# Supplementary material for: Aging potentiates glioma-driven remodeling of cortico-hippocampal neuron-astrocyte dynamics
Source: Research Square preprint supplement (doi:10.21203/rs.3.rs-8725420/v1), 2026-02-11
Supplement: Supplementary file 1 [file 178f341f88db5ba21cbc3d10.xlsx]

## Sheet: Extended Data Fig. 2c
Mixed-effects model (REML)	Matching by factor: Time
Assume sphericity?	Yes
Alpha	0.05
Fixed effects (type III)	P value	P value summary	Statistically significant (P < 0.05)?	F (DFn, DFd)
Time	0.0053	**	Yes	F (1, 43) = 8.643
Age	0.0029	**	Yes	F (1, 48) = 9.838
Treatment	0.141	ns	No	F (1, 48) = 2.240
Time x Age	0.2711	ns	No	F (1, 43) = 1.243
Time x Treatment	0.0148	*	Yes	F (1, 43) = 6.444
Age x Treatment	0.2838	ns	No	F (1, 48) = 1.175
Time x Age x Treatment	0.3064	ns	No	F (1, 43) = 1.072
Random effects	SD	Variance
Mouse	1.479	2.189
Residual	2.116	4.476
Was the matching effective?
Chi-square, df	5.191, 1
P value	0.0227
P value summary	*
Is there significant matching (P < 0.05)?	Yes

## Sheet: Extended Data Fig. 2d
Mixed-effects model (REML)	Matching by factors: Time & Age
Assume sphericity?	No
Alpha	0.05
Fixed effects (type III)	P value	P value summary	Statistically significant (P < 0.05)?	F (DFn, DFd)	Geisser-Greenhouse's epsilon
Time	0.0013	**	Yes	F (1.000, 29.00) = 12.62	1
Age	0.751	ns	No	F (1.000, 29.00) = 0.1026	1
Treatment	0.4989	ns	No	F (1, 29) = 0.4689
Time x Age	0.9088	ns	No	F (1.000, 5.000) = 0.01451	1
Time x Treatment	0.2148	ns	No	F (1.000, 29.00) = 1.609	1
Age x Treatment	0.0182	*	Yes	F (1.000, 29.00) = 6.269	1
Time x Age x Treatment	0.0796	ns	No	F (1.000, 5.000) = 4.817	1
Random effects	SD	Variance
Mouse	0.09989	0.009978
Mouse x Time	0	0
Mouse x Age	0	0
Residual	0.6663	0.4439
Was the matching effective?
Chi-square, df	0.05575, 1
P value	0.8134
P value summary	ns
Is there significant matching (P < 0.05)?	No

## Sheet: Extended Data Fig. 2e
Three-way ANOVA	Matching by factor: Time
Assume sphericity?	Yes
Alpha	0.05
Source of Variation	% of total variation	P value	P value summary	Significant?
Time	0.5028	0.2633	ns	No
Age	10.33	0.0054	**	Yes
Treatment	0.8552	0.4075	ns	No
Time x Age	0.01809	0.831	ns	No
Time x Treatment	0.09086	0.6327	ns	No
Age x Treatment	0.09063	0.7869	ns	No
Time x Age x Treatment	0.05725	0.7043	ns	No
Mouse	66.27
ANOVA table	SS	DF	MS	F (DFn, DFd)	P value
Time	1.955	1	1.955	F (1, 54) = 1.278	P=0.2633
Age	40.18	1	40.18	F (1, 54) = 8.420	P=0.0054
Treatment	3.325	1	3.325	F (1, 54) = 0.6968	P=0.4075
Time x Age	0.07033	1	0.07033	F (1, 54) = 0.04599	P=0.8310
Time x Treatment	0.3532	1	0.3532	F (1, 54) = 0.2310	P=0.6327
Age x Treatment	0.3523	1	0.3523	F (1, 54) = 0.07384	P=0.7869
Time x Age x Treatment	0.2226	1	0.2226	F (1, 54) = 0.1455	P=0.7043
Mouse	257.7	54	4.771
Residual	82.59	54	1.529

## Sheet: Extended Data Fig. 2f
Three-way ANOVA	Matching by factor: Time
Assume sphericity?	Yes
Alpha	0.05
Source of Variation	% of total variation	P value	P value summary	Significant?
Time	4.338	0.0098	**	Yes
Age	0.04307	0.8416	ns	No
Treatment	1.499	0.2413	ns	No
Time x Age	1.069	0.1895	ns	No
Time x Treatment	2.049	0.0714	ns	No
Age x Treatment	0.2837	0.6084	ns	No
Time x Age x Treatment	0.6709	0.2972	ns	No
Mouse	57.68
ANOVA table	SS	DF	MS	F (DFn, DFd)	P value
Time	1.951	1	1.951	F (1, 54) = 7.164	P=0.0098
Age	0.01937	1	0.01937	F (1, 54) = 0.04032	P=0.8416
Treatment	0.6743	1	0.6743	F (1, 54) = 1.404	P=0.2413
Time x Age	0.4809	1	0.4809	F (1, 54) = 1.766	P=0.1895
Time x Treatment	0.9214	1	0.9214	F (1, 54) = 3.383	P=0.0714
Age x Treatment	0.1276	1	0.1276	F (1, 54) = 0.2656	P=0.6084
Time x Age x Treatment	0.3017	1	0.3017	F (1, 54) = 1.108	P=0.2972
Mouse	25.94	54	0.4804
Residual	14.71	54	0.2723

## Sheet: Extended Data Fig. 2g
Mixed-effects model (REML)	Matching by factor: Time
Assume sphericity?	Yes
Alpha	0.05
Fixed effects (type III)	P value	P value summary	Statistically significant (P < 0.05)?	F (DFn, DFd)
Time	0.7331	ns	No	F (1, 44) = 0.1178
Age	0.2887	ns	No	F (1, 48) = 1.151
Treatment	0.3269	ns	No	F (1, 48) = 0.9811
Time x Age	0.6177	ns	No	F (1, 44) = 0.2527
Time x Treatment	0.9632	ns	No	F (1, 44) = 0.002156
Age x Treatment	0.2293	ns	No	F (1, 48) = 1.483
Time x Age x Treatment	0.7234	ns	No	F (1, 44) = 0.1269
Random effects	SD	Variance
Mouse	0.1625	0.02639
Residual	0.1722	0.02966
Was the matching effective?
Chi-square, df	10.34, 1
P value	0.0013
P value summary	**
Is there significant matching (P < 0.05)?	Yes

## Sheet: Extended Data Fig. 2h
Mixed-effects model (REML)	Matching by factor: Time
Assume sphericity?	Yes
Alpha	0.05
Fixed effects (type III)	P value	P value summary	Statistically significant (P < 0.05)?	F (DFn, DFd)
Time	0.5305	ns	No	F (1, 43) = 0.3998
Age	0.3181	ns	No	F (1, 48) = 1.018
Treatment	0.0451	*	Yes	F (1, 48) = 4.233
Time x Age	0.1369	ns	No	F (1, 43) = 2.297
Time x Treatment	0.0093	**	Yes	F (1, 43) = 7.408
Age x Treatment	0.1706	ns	No	F (1, 48) = 1.935
Time x Age x Treatment	0.117	ns	No	F (1, 43) = 2.559
Random effects	SD	Variance
Mouse	1.485	2.204
Residual	1.66	2.756
Was the matching effective?
Chi-square, df	10.22, 1
P value	0.0014
P value summary	**
Is there significant matching (P < 0.05)?	Yes

## Sheet: Extended Data Fig. 2i
Three-way ANOVA	Matching by factor: Time
Assume sphericity?	Yes
Alpha	0.05
Source of Variation	% of total variation	P value	P value summary	Significant?
Time	4.012	0.0059	**	Yes
Age	6.581	0.0177	*	Yes
Treatment	0.5412	0.486	ns	No
Time x Age	0.1791	0.5475	ns	No
Time x Treatment	0.1023	0.6492	ns	No
Age x Treatment	0.2119	0.6624	ns	No
Time x Age x Treatment	2.257	0.0362	*	Yes
Mouse	59.37
ANOVA table	SS	DF	MS	F (DFn, DFd)	P value
Time	0.3093	1	0.3093	F (1, 54) = 8.205	P=0.0059
Age	0.5074	1	0.5074	F (1, 54) = 5.986	P=0.0177
Treatment	0.04172	1	0.04172	F (1, 54) = 0.4922	P=0.4860
Time x Age	0.01381	1	0.01381	F (1, 54) = 0.3664	P=0.5475
Time x Treatment	0.00789	1	0.00789	F (1, 54) = 0.2093	P=0.6492
Age x Treatment	0.01634	1	0.01634	F (1, 54) = 0.1927	P=0.6624
Time x Age x Treatment	0.174	1	0.174	F (1, 54) = 4.616	P=0.0362
Mouse	4.577	54	0.08477
Residual	2.036	54	0.0377

## Sheet: Extended Data Fig. 2j
Three-way ANOVA	Matching by factor: Time
Assume sphericity?	Yes
Alpha	0.05
Source of Variation	% of total variation	P value	P value summary	Significant?
Time	4.465	0.0038	**	Yes
Age	8.948	0.0042	**	Yes
Treatment	0.5283	0.4703	ns	No
Time x Age	2.128	0.0413	*	Yes
Time x Treatment	1.326	0.1047	ns	No
Age x Treatment	1.428	0.2371	ns	No
Time x Age x Treatment	0.1924	0.5323	ns	No
Mouse	53.96
ANOVA table	SS	DF	MS	F (DFn, DFd)	P value
Time	30.4	1	30.4	F (1, 54) = 9.169	P=0.0038
Age	60.92	1	60.92	F (1, 54) = 8.955	P=0.0042
Treatment	3.597	1	3.597	F (1, 54) = 0.5287	P=0.4703
Time x Age	14.49	1	14.49	F (1, 54) = 4.370	P=0.0413
Time x Treatment	9.03	1	9.03	F (1, 54) = 2.723	P=0.1047
Age x Treatment	9.723	1	9.723	F (1, 54) = 1.429	P=0.2371
Time x Age x Treatment	1.31	1	1.31	F (1, 54) = 0.3951	P=0.5323
Mouse	367.4	54	6.803
Residual	179	54	3.316

## Sheet: Extended Data Fig. 2k
Mixed-effects model (REML)	Matching by factor: Time
Assume sphericity?	Yes
Alpha	0.05
Fixed effects (type III)	P value	P value summary	Statistically significant (P < 0.05)?	F (DFn, DFd)
Time	0.0033	**	Yes	F (1, 42) = 9.730
Age	0.9395	ns	No	F (1, 47) = 0.005815
Treatment	0.055	ns	No	F (1, 47) = 3.872
Time x Age	0.6619	ns	No	F (1, 42) = 0.1939
Time x Treatment	0.0119	*	Yes	F (1, 42) = 6.921
Age x Treatment	0.5412	ns	No	F (1, 47) = 0.3789
Time x Age x Treatment	0.0307	*	Yes	F (1, 42) = 5.001
Random effects	SD	Variance
Mouse	0.04839	0.002342
Residual	0.09854	0.009711
Was the matching effective?
Chi-square, df	1.718, 1
P value	0.1899
P value summary	ns
Is there significant matching (P < 0.05)?	No

## Sheet: Extended Data Fig. 2l
Three-way ANOVA	Matching by factor: Time
Assume sphericity?	Yes
Alpha	0.05
Source of Variation	% of total variation	P value	P value summary	Significant?
Time	2.146	0.0536	ns	No
Age	1.865	0.2095	ns	No
Treatment	0.8915	0.3838	ns	No
Time x Age	1.784	0.0775	ns	No
Time x Treatment	0.07169	0.7198	ns	No
Age x Treatment	0.0002098	0.9893	ns	No
Time x Age x Treatment	0.6199	0.2936	ns	No
Mouse	62.45
ANOVA table	SS	DF	MS	F (DFn, DFd)	P value
Time	0.03351	1	0.03351	F (1, 54) = 3.894	P=0.0536
Age	0.02912	1	0.02912	F (1, 54) = 1.613	P=0.2095
Treatment	0.01392	1	0.01392	F (1, 54) = 0.7709	P=0.3838
Time x Age	0.02786	1	0.02786	F (1, 54) = 3.238	P=0.0775
Time x Treatment	0.001119	1	0.001119	F (1, 54) = 0.1301	P=0.7198
Age x Treatment	3.275e-06	1	3.275e-06	F (1, 54) = 0.0001814	P=0.9893
Time x Age x Treatment	0.009679	1	0.009679	F (1, 54) = 1.125	P=0.2936
Mouse	0.975	54	0.01806
Residual	0.4646	54	0.008604

[truncated: 2 more sheets: Extended Data Fig. 2m, Extended Data Fig. 2n]
