# Supplementary material for: Aging potentiates glioma-driven remodeling of cortico-hippocampal neuron-astrocyte dynamics
Source: Research Square preprint supplement (doi:10.21203/rs.3.rs-8725420/v1), 2026-02-11
Supplement: Supplementary file 2 [file 4231639095592becff9fcbc1.xlsx]

## Sheet: Extended Data Fig. 6i
Two-way ANOVA	Ordinary
Alpha	0.05
Source of Variation	% of total variation	P value	P value summary	Significant?
Interaction	0.04765	0.8703	ns	No
Age	1.495	0.363	ns	No
Treatment	27.9	0.0003	***	Yes
ANOVA table	SS (Type III)	DF	MS	F (DFn, DFd)	P value
Interaction	0.141	1	0.141	F (1, 40) = 0.02699	P=0.8703
Age	4.422	1	4.422	F (1, 40) = 0.8467	P=0.3630
Treatment	82.54	1	82.54	F (1, 40) = 15.80	P=0.0003
Residual	208.9	40	5.223
Difference between column means
Predicted (LS) mean of Tumor	2.389
Predicted (LS) mean of Control	5.147
Difference between predicted means	-2.758
SE of difference	0.6938
95% CI of difference	-4.160 to -1.356
Difference between row means
Predicted (LS) mean of Young	3.449
Predicted (LS) mean of Aged	4.087
Difference between predicted means	-0.6384
SE of difference	0.6938
95% CI of difference	-2.041 to 0.7639
Interaction CI
Mean diff, A1 - B1	-2.644
Mean diff, A2 - B2	-2.872
(A1 -B1) - (A2 - B2)	0.228
95% CI of difference	-2.577 to 3.032
(B1 - A1) - (B2 - A2)	-0.228
95% CI of difference	-3.032 to 2.577

## Sheet: Extended Data Fig. 6j
Two-way ANOVA	Ordinary
Alpha	0.05
Source of Variation	% of total variation	P value	P value summary	Significant?
Interaction	0.04033	0.8776	ns	No
Age	2.208	0.2581	ns	No
Treatment	28.28	0.0002	***	Yes
ANOVA table	SS (Type III)	DF	MS	F (DFn, DFd)	P value
Interaction	0.03264	1	0.03264	F (1, 41) = 0.02403	P=0.8776
Age	1.787	1	1.787	F (1, 41) = 1.315	P=0.2581
Treatment	22.88	1	22.88	F (1, 41) = 16.85	P=0.0002
Residual	55.7	41	1.358
Difference between column means
Predicted (LS) mean of Tumor	7.174
Predicted (LS) mean of Control	8.604
Difference between predicted means	-1.43
SE of difference	0.3485
95% CI of difference	-2.134 to -0.7265
Difference between row means
Predicted (LS) mean of Young	8.089
Predicted (LS) mean of Aged	7.689
Difference between predicted means	0.3997
SE of difference	0.3485
95% CI of difference	-0.3041 to 1.103
Interaction CI
Mean diff, A1 - B1	-1.376
Mean diff, A2 - B2	-1.484
(A1 -B1) - (A2 - B2)	0.108
95% CI of difference	-1.300 to 1.516
(B1 - A1) - (B2 - A2)	-0.108
95% CI of difference	-1.516 to 1.300

## Sheet: Extended Data Fig. 6k
Two-way ANOVA	Ordinary
Alpha	0.05
Source of Variation	% of total variation	P value	P value summary	Significant?
Interaction	0.1183	0.8058	ns	No
Age	0.1377	0.7908	ns	No
Treatment	0.8759	0.5043	ns	No
ANOVA table	SS (Type III)	DF	MS	F (DFn, DFd)	P value
Interaction	0.228	1	0.228	F (1, 51) = 0.06108	P=0.8058
Age	0.2654	1	0.2654	F (1, 51) = 0.07109	P=0.7908
Treatment	1.688	1	1.688	F (1, 51) = 0.4523	P=0.5043
Residual	190.4	51	3.733
Difference between column means
Predicted (LS) mean of Tumor	2.797
Predicted (LS) mean of Control	3.151
Difference between predicted means	-0.3541
SE of difference	0.5265
95% CI of difference	-1.411 to 0.7028
Difference between row means
Predicted (LS) mean of Young	2.904
Predicted (LS) mean of Aged	3.045
Difference between predicted means	-0.1404
SE of difference	0.5265
95% CI of difference	-1.197 to 0.9165
Interaction CI
Mean diff, A1 - B1	-0.224
Mean diff, A2 - B2	-0.4842
(A1 -B1) - (A2 - B2)	0.2602
95% CI of difference	-1.854 to 2.374
(B1 - A1) - (B2 - A2)	-0.2602
95% CI of difference	-2.374 to 1.854

## Sheet: Extended Data Fig. 6l
Two-way ANOVA	Ordinary
Alpha	0.05
Source of Variation	% of total variation	P value	P value summary	Significant?
Interaction	0.0337	0.8886	ns	No
Age	8.772	0.0274	*	Yes
Treatment	4.522	0.1091	ns	No
ANOVA table	SS (Type III)	DF	MS	F (DFn, DFd)	P value
Interaction	0.04071	1	0.04071	F (1, 51) = 0.01982	P=0.8886
Age	10.6	1	10.6	F (1, 51) = 5.159	P=0.0274
Treatment	5.464	1	5.464	F (1, 51) = 2.660	P=0.1091
Residual	104.8	51	2.054
Difference between column means
Predicted (LS) mean of Tumor	7.845
Predicted (LS) mean of Control	8.482
Difference between predicted means	-0.6369
SE of difference	0.3905
95% CI of difference	-1.421 to 0.1471
Difference between row means
Predicted (LS) mean of Young	8.607
Predicted (LS) mean of Aged	7.72
Difference between predicted means	0.8871
SE of difference	0.3905
95% CI of difference	0.1030 to 1.671
Interaction CI
Mean diff, A1 - B1	-0.582
Mean diff, A2 - B2	-0.6919
(A1 -B1) - (A2 - B2)	0.11
95% CI of difference	-1.458 to 1.678
(B1 - A1) - (B2 - A2)	-0.11
95% CI of difference	-1.678 to 1.458
