# Supplementary material for: Aging potentiates glioma-driven remodeling of cortico-hippocampal neuron-astrocyte dynamics
Source: Research Square preprint supplement (doi:10.21203/rs.3.rs-8725420/v1), 2026-02-11
Supplement: Supplementary file 3 [file 60f6e9535d65341725c057df.xlsx]

## Sheet: Fig.1c
Three-way ANOVA	Matching by factor: Behavior
Assume sphericity?	Yes
Alpha	0.05
Source of Variation	% of total variation	P value	P value summary	Significant?
Behavior	52.09	<0.0001	****	Yes
Age	0.3369	0.434	ns	No
Treatment	1.922	0.0658	ns	No
Behavior x Age	0.04386	0.7515	ns	No
Behavior x Treatment	0.1573	0.5493	ns	No
Age x Treatment	0.2931	0.4654	ns	No
Behavior x Age x Treatment	0.1786	0.5235	ns	No
Subject	24.88
ANOVA table	SS	DF	MS	F (DFn, DFd)	P value
Behavior	470.6	1	470.6	F (1, 46) = 120.6	P<0.0001
Age	3.044	1	3.044	F (1, 46) = 0.6229	P=0.4340
Treatment	17.36	1	17.36	F (1, 46) = 3.553	P=0.0658
Behavior x Age	0.3962	1	0.3962	F (1, 46) = 0.1015	P=0.7515
Behavior x Treatment	1.421	1	1.421	F (1, 46) = 0.3639	P=0.5493
Age x Treatment	2.648	1	2.648	F (1, 46) = 0.5420	P=0.4654
Behavior x Age x Treatment	1.614	1	1.614	F (1, 46) = 0.4134	P=0.5235
Subject	224.8	46	4.886
Residual	179.6	46	3.904

## Sheet: Fig. 1d
Mixed-effects model (REML)	Matching by factor: Behavior
Assume sphericity?	Yes
Alpha	0.05
Fixed effects (type III)	P value	P value summary	Statistically significant (P < 0.05)?	F (DFn, DFd)
Behavior	<0.0001	****	Yes	F (1, 87) = 47.11
Age	0.148	ns	No	F (1, 87) = 2.130
Treatment	0.008	**	Yes	F (1, 87) = 7.376
Behavior x Age	0.4288	ns	No	F (1, 87) = 0.6318
Behavior x Treatment	0.0094	**	Yes	F (1, 87) = 7.065
Age x Treatment	0.2514	ns	No	F (1, 87) = 1.333
Behavior x Age x Treatment	0.314	ns	No	F (1, 87) = 1.026
Random effects	SD	Variance
Subject	0	0
Residual	3.941	15.53

## Sheet: Fig. 1e
Three-way ANOVA	Matching by factor: Behavior
Assume sphericity?	Yes
Alpha	0.05
Source of Variation	% of total variation	P value	P value summary	Significant?
Behavior	12.27	<0.0001	****	Yes
Age	3.447	0.044	*	Yes
Treatment	0.1321	0.6882	ns	No
Behavior x Age	3.783	0.0153	*	Yes
Behavior x Treatment	0.9636	0.2121	ns	No
Age x Treatment	1.312	0.2089	ns	No
Behavior x Age x Treatment	0.06619	0.742	ns	No
Subject	45.47
ANOVA table	SS	DF	MS	F (DFn, DFd)	P value
Behavior	124.8	1	124.8	F (1, 56) = 20.28	P<0.0001
Age	35.07	1	35.07	F (1, 56) = 4.245	P=0.0440
Treatment	1.344	1	1.344	F (1, 56) = 0.1627	P=0.6882
Behavior x Age	38.48	1	38.48	F (1, 56) = 6.256	P=0.0153
Behavior x Treatment	9.802	1	9.802	F (1, 56) = 1.594	P=0.2121
Age x Treatment	13.35	1	13.35	F (1, 56) = 1.616	P=0.2089
Behavior x Age x Treatment	0.6733	1	0.6733	F (1, 56) = 0.1095	P=0.7420
Subject	462.6	56	8.26
Residual	344.5	56	6.151

## Sheet: Fig. 1f
Mixed-effects model (REML)	Matching by factor: Behavior
Assume sphericity?	Yes
Alpha	0.05
Fixed effects (type III)	P value	P value summary	Statistically significant (P < 0.05)?	F (DFn, DFd)
Behavior	<0.0001	****	Yes	F (1, 52) = 109.1
Age	0.0119	*	Yes	F (1, 56) = 6.762
Treatment	0.1089	ns	No	F (1, 56) = 2.653
Behavior x Age	0.0342	*	Yes	F (1, 52) = 4.728
Behavior x Treatment	0.0694	ns	No	F (1, 52) = 3.438
Age x Treatment	0.151	ns	No	F (1, 56) = 2.119
Behavior x Age x Treatment	0.149	ns	No	F (1, 52) = 2.146
Random effects	SD	Variance
Subject	3.525	12.42
Residual	2.425	5.879

## Sheet: Fig. 1g
Two-way ANOVA	Ordinary
Alpha	0.05
Source of Variation	% of total variation	P value	P value summary	Significant?
Interaction	0.1413	0.7632	ns	No
Age	26.67	0.0001	***	Yes
Treatment	1.969	0.2637	ns	No
ANOVA table	SS (Type III)	DF	MS	F (DFn, DFd)	P value
Interaction	0.003299	1	0.003299	F (1, 46) = 0.09189	P=0.7632
Age	0.6227	1	0.6227	F (1, 46) = 17.35	P=0.0001
Treatment	0.04597	1	0.04597	F (1, 46) = 1.281	P=0.2637
Residual	1.651	46	0.0359
Difference between column means
Predicted (LS) mean of Tumor	0.5054
Predicted (LS) mean of Control	0.5663
Difference between predicted means	-0.06089
SE of difference	0.0538
95% CI of difference	-0.1692 to 0.04742
Difference between row means
Predicted (LS) mean of Young	0.6479
Predicted (LS) mean of Aged	0.4238
Difference between predicted means	0.2241
SE of difference	0.0538
95% CI of difference	0.1158 to 0.3324
Interaction CI
Mean diff, A1 - B1	-0.04458
Mean diff, A2 - B2	-0.0772
(A1 -B1) - (A2 - B2)	0.03262
95% CI of difference	-0.1840 to 0.2492
(B1 - A1) - (B2 - A2)	-0.03262
95% CI of difference	-0.2492 to 0.1840

## Sheet: Fig. 1h
Two-way ANOVA	Ordinary
Alpha	0.05
Source of Variation	% of total variation	P value	P value summary	Significant?
Interaction	10.35	0.0184	*	Yes
Age	1.441	0.3661	ns	No
Treatment	11.79	0.0123	*	Yes
ANOVA table	SS (Type III)	DF	MS	F (DFn, DFd)	P value
Interaction	0.1897	1	0.1897	F (1, 44) = 5.992	P=0.0184
Age	0.0264	1	0.0264	F (1, 44) = 0.8339	P=0.3661
Treatment	0.2161	1	0.2161	F (1, 44) = 6.825	P=0.0123
Residual	1.393	44	0.03166
Difference between column means
Predicted (LS) mean of Tumor	0.6204
Predicted (LS) mean of Control	0.7555
Difference between predicted means	-0.1351
SE of difference	0.05173
95% CI of difference	-0.2394 to -0.03089
Difference between row means
Predicted (LS) mean of Young	0.7116
Predicted (LS) mean of Aged	0.6643
Difference between predicted means	0.04724
SE of difference	0.05173
95% CI of difference	-0.05702 to 0.1515
Interaction CI
Mean diff, A1 - B1	-0.008519
Mean diff, A2 - B2	-0.2618
(A1 -B1) - (A2 - B2)	0.2533
95% CI of difference	0.04474 to 0.4618
(B1 - A1) - (B2 - A2)	-0.2533
95% CI of difference	-0.4618 to -0.04474

## Sheet: Fig. 1i
Two-way ANOVA	Ordinary
Alpha	0.05
Source of Variation	% of total variation	P value	P value summary	Significant?
Interaction	1.278	0.4144	ns	No
Age	2.285	0.2766	ns	No
Treatment	10.48	0.0227	*	Yes
ANOVA table	SS (Type III)	DF	MS	F (DFn, DFd)	P value
Interaction	0.009479	1	0.009479	F (1, 45) = 0.6786	P=0.4144
Age	0.01694	1	0.01694	F (1, 45) = 1.213	P=0.2766
Treatment	0.07774	1	0.07774	F (1, 45) = 5.565	P=0.0227
Residual	0.6287	45	0.01397
Difference between column means
Predicted (LS) mean of Tumor	0.3238
Predicted (LS) mean of Control	0.404
Difference between predicted means	-0.08029
SE of difference	0.03404
95% CI of difference	-0.1488 to -0.01174
Difference between row means
Predicted (LS) mean of Young	0.3826
Predicted (LS) mean of Aged	0.3452
Difference between predicted means	0.03748
SE of difference	0.03404
95% CI of difference	-0.03107 to 0.1060
Interaction CI
Mean diff, A1 - B1	-0.05225
Mean diff, A2 - B2	-0.1083
(A1 -B1) - (A2 - B2)	0.05607
95% CI of difference	-0.08103 to 0.1932
(B1 - A1) - (B2 - A2)	-0.05607
95% CI of difference	-0.1932 to 0.08103

## Sheet: Fig. 1j
Two-way ANOVA	Ordinary
Alpha	0.05
Source of Variation	% of total variation	P value	P value summary	Significant?
Interaction	0.000231	0.9901	ns	No
Age	15.87	0.0018	**	Yes
Treatment	1.263	0.3603	ns	No
ANOVA table	SS (Type III)	DF	MS	F (DFn, DFd)	P value
Interaction	2.866e-06	1	2.866e-06	F (1, 56) = 0.0001556	P=0.9901
Age	0.1969	1	0.1969	F (1, 56) = 10.69	P=0.0018
Treatment	0.01567	1	0.01567	F (1, 56) = 0.8506	P=0.3603
Residual	1.032	56	0.01842
Difference between column means
Predicted (LS) mean of Tumor	0.3032
Predicted (LS) mean of Control	0.3357
Difference between predicted means	-0.03244
SE of difference	0.03517
95% CI of difference	-0.1029 to 0.03802
Difference between row means
Predicted (LS) mean of Young	0.377
Predicted (LS) mean of Aged	0.262
Difference between predicted means	0.115
SE of difference	0.03517
95% CI of difference	0.04453 to 0.1854
Interaction CI
Mean diff, A1 - B1	-0.03288
Mean diff, A2 - B2	-0.032
(A1 -B1) - (A2 - B2)	-0.0008774
95% CI of difference	-0.1418 to 0.1400
(B1 - A1) - (B2 - A2)	0.0008774
95% CI of difference	-0.1400 to 0.1418

## Sheet: Fig. 2e
Two-way ANOVA	Ordinary
Alpha	0.05
Source of Variation	% of total variation	P value	P value summary	Significant?
Interaction	0.03338	0.8951	ns	No
Age	1.274	0.4168	ns	No
Treatment	8.994	0.0346	*	Yes
ANOVA table	SS (Type III)	DF	MS	F (DFn, DFd)	P value
Interaction	79.43	1	79.43	F (1, 47) = 0.01758	P=0.8951
Age	3032	1	3032	F (1, 47) = 0.6712	P=0.4168
Treatment	21402	1	21402	F (1, 47) = 4.737	P=0.0346
Residual	212343	47	4518
Difference between column means
Predicted (LS) mean of Tumor	118.9
Predicted (LS) mean of Control	160.1
Difference between predicted means	-41.13
SE of difference	18.9
95% CI of difference	-79.15 to -3.113
Difference between row means
Predicted (LS) mean of Young	147.2
Predicted (LS) mean of Aged	131.8
Difference between predicted means	15.48
SE of difference	18.9
95% CI of difference	-22.54 to 53.50
Interaction CI
Mean diff, A1 - B1	-38.63
Mean diff, A2 - B2	-43.64
(A1 -B1) - (A2 - B2)	5.011
95% CI of difference	-71.02 to 81.05
(B1 - A1) - (B2 - A2)	-5.011
95% CI of difference	-81.05 to 71.02

## Sheet: Fig. 2f
Two-way ANOVA	Ordinary
Alpha	0.05
Source of Variation	% of total variation	P value	P value summary	Significant?
Interaction	1.565	0.3664	ns	No
Age	2.827	0.2264	ns	No
Treatment	6.498	0.0694	ns	No
ANOVA table	SS (Type III)	DF	MS	F (DFn, DFd)	P value
Interaction	0.1647	1	0.1647	F (1, 47) = 0.8319	P=0.3664
Age	0.2975	1	0.2975	F (1, 47) = 1.502	P=0.2264
Treatment	0.6839	1	0.6839	F (1, 47) = 3.454	P=0.0694
Residual	9.307	47	0.198
Difference between column means
Predicted (LS) mean of Tumor	1.329
Predicted (LS) mean of Control	1.561
Difference between predicted means	-0.2325
SE of difference	0.1251
95% CI of difference	-0.4842 to 0.01918
Difference between row means
Predicted (LS) mean of Young	1.522
Predicted (LS) mean of Aged	1.368
Difference between predicted means	0.1533
SE of difference	0.1251
95% CI of difference	-0.09833 to 0.4050
Interaction CI
Mean diff, A1 - B1	-0.3466
Mean diff, A2 - B2	-0.1184
(A1 -B1) - (A2 - B2)	-0.2282
95% CI of difference	-0.7316 to 0.2751
(B1 - A1) - (B2 - A2)	0.2282
95% CI of difference	-0.2751 to 0.7316

[truncated: 8 more sheets: Fig. 2g, Fig. 2h, Fig. 2i, Fig. 2k, Fig. 2l, Fig. 2m, Fig. 2n, Fig. 2o]
