# Supplementary material for: Aging potentiates glioma-driven remodeling of cortico-hippocampal neuron-astrocyte dynamics
Source: Research Square preprint supplement (doi:10.21203/rs.3.rs-8725420/v1), 2026-02-11
Supplement: Supplementary file 4 [file 77aba8f2dffe08b9e2561781.xlsx]

## Sheet: Extended Data Fig. 4a
Two-way ANOVA	Ordinary
Alpha	0.05
Source of Variation	% of total variation	P value	P value summary	Significant?
Interaction	7.096	0.0041	**	Yes
Age	0.4817	0.4466	ns	No
Treatment	0.5188	0.4296	ns	No
ANOVA table	SS (Type III)	DF	MS	F (DFn, DFd)	P value
Interaction	1105	1	1105	F (1, 111) = 8.593	P=0.0041
Age	74.98	1	74.98	F (1, 111) = 0.5833	P=0.4466
Treatment	80.77	1	80.77	F (1, 111) = 0.6284	P=0.4296
Residual	14268	111	128.5
Difference between column means
Predicted (LS) mean of GBM	51.52
Predicted (LS) mean of Control	53.21
Difference between predicted means	-1.682
SE of difference	2.122
95% CI of difference	-5.886 to 2.522
Difference between row means
Predicted (LS) mean of Young	53.18
Predicted (LS) mean of Aged	51.56
Difference between predicted means	1.62
SE of difference	2.122
95% CI of difference	-2.584 to 5.825
Interaction CI
Mean diff, A1 - B1	4.538
Mean diff, A2 - B2	-7.901
(A1 -B1) - (A2 - B2)	12.44
95% CI of difference	4.031 to 20.85
(B1 - A1) - (B2 - A2)	-12.44
95% CI of difference	-20.85 to -4.031

## Sheet: Extended Data Fig. 4b
Two-way ANOVA	Ordinary
Alpha	0.05
Source of Variation	% of total variation	P value	P value summary	Significant?
Interaction	7.197	0.0323	*	Yes
Age	2.016	0.2504	ns	No
Treatment	4.476	0.089	ns	No
ANOVA table	SS (Type III)	DF	MS	F (DFn, DFd)	P value
Interaction	6914	1	6914	F (1, 57) = 4.814	P=0.0323
Age	1936	1	1936	F (1, 57) = 1.348	P=0.2504
Treatment	4300	1	4300	F (1, 57) = 2.994	P=0.0890
Residual	81861	57	1436
Difference between column means
Predicted (LS) mean of GBM	74.07
Predicted (LS) mean of Control	91.04
Difference between predicted means	-16.98
SE of difference	9.81
95% CI of difference	-36.62 to 2.670
Difference between row means
Predicted (LS) mean of Young	76.86
Predicted (LS) mean of Aged	88.25
Difference between predicted means	-11.39
SE of difference	9.81
95% CI of difference	-31.04 to 8.253
Interaction CI
Mean diff, A1 - B1	4.55
Mean diff, A2 - B2	-38.5
(A1 -B1) - (A2 - B2)	43.05
95% CI of difference	3.760 to 82.34
(B1 - A1) - (B2 - A2)	-43.05
95% CI of difference	-82.34 to -3.760

## Sheet: Extended Data Fig. 4c
Two-way ANOVA	Ordinary
Alpha	0.05
Source of Variation	% of total variation	P value	P value summary	Significant?
Interaction	3.201	0.0314	*	Yes
Age	0.7221	0.3022	ns	No
Treatment	24.82	<0.0001	****	Yes
ANOVA table	SS (Type III)	DF	MS	F (DFn, DFd)	P value
Interaction	1306	1	1306	F (1, 98) = 4.769	P=0.0314
Age	294.7	1	294.7	F (1, 98) = 1.076	P=0.3022
Treatment	10130	1	10130	F (1, 98) = 36.98	P<0.0001
Residual	26844	98	273.9
Difference between column means
Predicted (LS) mean of GBM	32.79
Predicted (LS) mean of Control	12.36
Difference between predicted means	20.43
SE of difference	3.36
95% CI of difference	13.76 to 27.10
Difference between row means
Predicted (LS) mean of Young	20.84
Predicted (LS) mean of Aged	24.32
Difference between predicted means	-3.485
SE of difference	3.36
95% CI of difference	-10.15 to 3.183
Interaction CI
Mean diff, A1 - B1	13.09
Mean diff, A2 - B2	27.77
(A1 -B1) - (A2 - B2)	-14.67
95% CI of difference	-28.01 to -1.339
(B1 - A1) - (B2 - A2)	14.67
95% CI of difference	1.339 to 28.01

## Sheet: Extended Data Fig. 4d
Two-way ANOVA	Ordinary
Alpha	0.05
Source of Variation	% of total variation	P value	P value summary	Significant?
Interaction	13.39	0.0011	**	Yes
Age	0.2593	0.6303	ns	No
Treatment	39.68	<0.0001	****	Yes
ANOVA table	SS (Type III)	DF	MS	F (DFn, DFd)	P value
Interaction	225.3	1	225.3	F (1, 49) = 12.11	P=0.0011
Age	4.363	1	4.363	F (1, 49) = 0.2346	P=0.6303
Treatment	667.7	1	667.7	F (1, 49) = 35.90	P<0.0001
Residual	911.4	49	18.6
Difference between column means
Predicted (LS) mean of GBM	4.2
Predicted (LS) mean of Control	11.48
Difference between predicted means	-7.284
SE of difference	1.216
95% CI of difference	-9.728 to -4.841
Difference between row means
Predicted (LS) mean of Young	7.547
Predicted (LS) mean of Aged	8.136
Difference between predicted means	-0.5889
SE of difference	1.216
95% CI of difference	-3.032 to 1.854
Interaction CI
Mean diff, A1 - B1	-3.053
Mean diff, A2 - B2	-11.52
(A1 -B1) - (A2 - B2)	8.463
95% CI of difference	3.577 to 13.35
(B1 - A1) - (B2 - A2)	-8.463
95% CI of difference	-13.35 to -3.577
