# Supplementary material for: Aging potentiates glioma-driven remodeling of cortico-hippocampal neuron-astrocyte dynamics
Source: Research Square preprint supplement (doi:10.21203/rs.3.rs-8725420/v1), 2026-02-11
Supplement: Supplementary file 5 [file 9c275fd74bdd495ef50c11b7.xlsx]

## Sheet: Fig. 3d
Mixed-effects model (REML)	Matching by factor: Behavior
Assume sphericity?	Yes
Alpha	0.05
Fixed effects (type III)	P value	P value summary	Statistically significant (P < 0.05)?	F (DFn, DFd)
Behavior	0.0045	**	Yes	F (1, 43) = 8.965
Age	0.0092	**	Yes	F (1, 44) = 7.431
Treatment	0.1334	ns	No	F (1, 44) = 2.338
Behavior x Age	0.3914	ns	No	F (1, 43) = 0.7497
Behavior x Treatment	0.6497	ns	No	F (1, 43) = 0.2092
Age x Treatment	0.4259	ns	No	F (1, 44) = 0.6458
Behavior x Age x Treatment	0.7506	ns	No	F (1, 43) = 0.1023
Random effects	SD	Variance
Mouse	1.951	3.807
Residual	2.087	4.356
Was the matching effective?
Chi-square, df	10.76, 1
P value	0.001
P value summary	**
Is there significant matching (P < 0.05)?	Yes

## Sheet: Fig. 3e
Mixed-effects model (REML)	Matching by factor: Behavior
Assume sphericity?	Yes
Alpha	0.05
Fixed effects (type III)	P value	P value summary	Statistically significant (P < 0.05)?	F (DFn, DFd)
Behavior	0.8457	ns	No	F (1, 42) = 0.03832
Age	0.7968	ns	No	F (1, 44) = 0.06713
Treatment	0.0008	***	Yes	F (1, 44) = 12.84
Behavior x Age	0.5152	ns	No	F (1, 42) = 0.4307
Behavior x Treatment	0.6905	ns	No	F (1, 42) = 0.1607
Age x Treatment	0.864	ns	No	F (1, 44) = 0.02969
Behavior x Age x Treatment	0.4722	ns	No	F (1, 42) = 0.5263
Random effects	SD	Variance
Mouse	0.3236	0.1047
Residual	0.3683	0.1356
Was the matching effective?
Chi-square, df	8.857, 1
P value	0.0029
P value summary	**
Is there significant matching (P < 0.05)?	Yes

## Sheet: Fig. 3f
Table Analyzed	AUC_withY_Astro_mPFC
Mixed-effects model (REML)	Matching by factor: Behavior
Assume sphericity?	Yes
Alpha	0.05
Fixed effects (type III)	P value	P value summary	Statistically significant (P < 0.05)?	F (DFn, DFd)
Behavior	0.1836	ns	No	F (1, 39) = 1.833
Age	0.1761	ns	No	F (1, 43) = 1.892
Treatment	<0.0001	****	Yes	F (1, 43) = 19.82
Behavior x Age	0.0103	*	Yes	F (1, 39) = 7.272
Behavior x Treatment	0.5157	ns	No	F (1, 39) = 0.4302
Age x Treatment	0.1451	ns	No	F (1, 43) = 2.202
Behavior x Age x Treatment	0.0439	*	Yes	F (1, 39) = 4.337
Random effects	SD	Variance
Mouse	2.491	6.205
Residual	1.748	3.055
Was the matching effective?
Chi-square, df	24.27, 1
P value	<0.0001
P value summary	****
Is there significant matching (P < 0.05)?	Yes

## Sheet: Fig. 3g
Mixed-effects model (REML)	Matching by factor: Behavior
Assume sphericity?	Yes
Alpha	0.05
Fixed effects (type III)	P value	P value summary	Statistically significant (P < 0.05)?	F (DFn, DFd)
Behavior	<0.0001	****	Yes	F (1, 53) = 30.87
Age	0.0196	*	Yes	F (1, 54) = 5.784
Treatment	0.1784	ns	No	F (1, 54) = 1.859
Behavior x Age	0.1931	ns	No	F (1, 53) = 1.738
Behavior x Treatment	0.5346	ns	No	F (1, 53) = 0.3907
Age x Treatment	0.0196	*	Yes	F (1, 54) = 5.788
Behavior x Age x Treatment	0.2109	ns	No	F (1, 53) = 1.603
Random effects	SD	Variance
Mouse	1.162	1.351
Residual	1.815	3.295
Was the matching effective?
Chi-square, df	4.765, 1
P value	0.029
P value summary	*
Is there significant matching (P < 0.05)?	Yes

## Sheet: Fig. 3h
Mixed-effects model (REML)	Matching by factor: Behavior
Assume sphericity?	Yes
Alpha	0.05
Fixed effects (type III)	P value	P value summary	Statistically significant (P < 0.05)?	F (DFn, DFd)
Behavior	0.0919	ns	No	F (1, 52) = 2.949
Age	0.0001	***	Yes	F (1, 54) = 17.57
Treatment	0.0141	*	Yes	F (1, 54) = 6.432
Behavior x Age	0.4453	ns	No	F (1, 52) = 0.5915
Behavior x Treatment	0.0507	ns	No	F (1, 52) = 4.000
Age x Treatment	0.1603	ns	No	F (1, 54) = 2.027
Behavior x Age x Treatment	0.4997	ns	No	F (1, 52) = 0.4621
Random effects	SD	Variance
Mouse	2.189	4.79
Residual	3.311	10.96
Was the matching effective?
Chi-square, df	4.708, 1
P value	0.03
P value summary	*
Is there significant matching (P < 0.05)?	Yes

## Sheet: Fig. 4e
Two-way ANOVA	Ordinary
Alpha	0.05
Source of Variation	% of total variation	P value	P value summary	Significant?
Interaction	2.375	0.2252	ns	No
Age	9.266	0.0194	*	Yes
Treatment	21.79	0.0006	***	Yes
ANOVA table	SS (Type III)	DF	MS	F (DFn, DFd)	P value
Interaction	36678	1	36678	F (1, 42) = 1.515	P=0.2252
Age	143079	1	143079	F (1, 42) = 5.909	P=0.0194
Treatment	336460	1	336460	F (1, 42) = 13.90	P=0.0006
Residual	1016897	42	24212
Difference between column means
Predicted (LS) mean of Tumor	136.9
Predicted (LS) mean of Control	310.2
Difference between predicted means	-173.2
SE of difference	46.47
95% CI of difference	-267.0 to -79.45
Difference between row means
Predicted (LS) mean of Young	167.1
Predicted (LS) mean of Aged	280
Difference between predicted means	-113
SE of difference	46.47
95% CI of difference	-206.8 to -19.19
Interaction CI
Mean diff, A1 - B1	-116
Mean diff, A2 - B2	-230.4
(A1 -B1) - (A2 - B2)	114.4
95% CI of difference	-73.17 to 302.0
(B1 - A1) - (B2 - A2)	-114.4
95% CI of difference	-302.0 to 73.17

## Sheet: Fig. 4f
Two-way ANOVA	Ordinary
Alpha	0.05
Source of Variation	% of total variation	P value	P value summary	Significant?
Interaction	0.647	0.5343	ns	No
Age	12.49	0.0087	**	Yes
Treatment	16.76	0.0027	**	Yes
ANOVA table	SS (Type III)	DF	MS	F (DFn, DFd)	P value
Interaction	0.1458	1	0.1458	F (1, 42) = 0.3926	P=0.5343
Age	2.815	1	2.815	F (1, 42) = 7.579	P=0.0087
Treatment	3.777	1	3.777	F (1, 42) = 10.17	P=0.0027
Residual	15.6	42	0.3714
Difference between column means
Predicted (LS) mean of Tumor	0.7797
Predicted (LS) mean of Control	1.36
Difference between predicted means	-0.5805
SE of difference	0.182
95% CI of difference	-0.9478 to -0.2131
Difference between row means
Predicted (LS) mean of Young	0.8194
Predicted (LS) mean of Aged	1.32
Difference between predicted means	-0.5011
SE of difference	0.182
95% CI of difference	-0.8684 to -0.1338
Interaction CI
Mean diff, A1 - B1	-0.4664
Mean diff, A2 - B2	-0.6945
(A1 -B1) - (A2 - B2)	0.2281
95% CI of difference	-0.5066 to 0.9628
(B1 - A1) - (B2 - A2)	-0.2281
95% CI of difference	-0.9628 to 0.5066

## Sheet: Fig. 4h
Two-way ANOVA	Ordinary
Alpha	0.05
Source of Variation	% of total variation	P value	P value summary	Significant?
Interaction	0.981	0.3879	ns	No
Age	26	<0.0001	****	Yes
Treatment	5.181	0.0506	ns	No
ANOVA table	SS (Type III)	DF	MS	F (DFn, DFd)	P value
Interaction	0.4004	1	0.4004	F (1, 52) = 0.7581	P=0.3879
Age	10.61	1	10.61	F (1, 52) = 20.09	P<0.0001
Treatment	2.115	1	2.115	F (1, 52) = 4.004	P=0.0506
Residual	27.46	52	0.5282
Difference between column means
Predicted (LS) mean of Tumor	1.057
Predicted (LS) mean of Control	1.446
Difference between predicted means	-0.3892
SE of difference	0.1945
95% CI of difference	-0.7794 to 0.001096
Difference between row means
Predicted (LS) mean of Young	0.8152
Predicted (LS) mean of Aged	1.687
Difference between predicted means	-0.8717
SE of difference	0.1945
95% CI of difference	-1.262 to -0.4815
Interaction CI
Mean diff, A1 - B1	-0.2198
Mean diff, A2 - B2	-0.5585
(A1 -B1) - (A2 - B2)	0.3387
95% CI of difference	-0.4418 to 1.119
(B1 - A1) - (B2 - A2)	-0.3387
95% CI of difference	-1.119 to 0.4418

## Sheet: Fig. 4i
Two-way ANOVA	Ordinary
Alpha	0.05
Source of Variation	% of total variation	P value	P value summary	Significant?
Interaction	2.864	0.1526	ns	No
Age	0.5104	0.5423	ns	No
Treatment	31.11	<0.0001	****	Yes
ANOVA table	SS (Type III)	DF	MS	F (DFn, DFd)	P value
Interaction	0.01957	1	0.01957	F (1, 47) = 2.114	P=0.1526
Age	0.003487	1	0.003487	F (1, 47) = 0.3768	P=0.5423
Treatment	0.2125	1	0.2125	F (1, 47) = 22.96	P<0.0001
Residual	0.435	47	0.009256
Difference between column means
Predicted (LS) mean of Tumor	0.1085
Predicted (LS) mean of Control	0.2394
Difference between predicted means	-0.131
SE of difference	0.02733
95% CI of difference	-0.1859 to -0.07598
Difference between row means
Predicted (LS) mean of Young	0.1823
Predicted (LS) mean of Aged	0.1656
Difference between predicted means	0.01677
SE of difference	0.02733
95% CI of difference	-0.03820 to 0.07175
Interaction CI
Mean diff, A1 - B1	-0.09122
Mean diff, A2 - B2	-0.1707
(A1 -B1) - (A2 - B2)	0.07947
95% CI of difference	-0.03048 to 0.1894
(B1 - A1) - (B2 - A2)	-0.07947
95% CI of difference	-0.1894 to 0.03048

## Sheet: Fig. 4j
Two-way ANOVA	Ordinary
Alpha	0.05
Source of Variation	% of total variation	P value	P value summary	Significant?
Interaction	0.2842	0.6791	ns	No
Age	2.431	0.2291	ns	No
Treatment	5.681	0.0683	ns	No
ANOVA table	SS (Type III)	DF	MS	F (DFn, DFd)	P value
Interaction	0.001532	1	0.001532	F (1, 56) = 0.1729	P=0.6791
Age	0.0131	1	0.0131	F (1, 56) = 1.479	P=0.2291
Treatment	0.03062	1	0.03062	F (1, 56) = 3.456	P=0.0683
Residual	0.4962	56	0.00886
Difference between column means
Predicted (LS) mean of Tumor	0.2719
Predicted (LS) mean of Control	0.3172
Difference between predicted means	-0.04534
SE of difference	0.02439
95% CI of difference	-0.09420 to 0.003519
Difference between row means
Predicted (LS) mean of Young	0.3094
Predicted (LS) mean of Aged	0.2797
Difference between predicted means	0.02966
SE of difference	0.02439
95% CI of difference	-0.01920 to 0.07852
Interaction CI
Mean diff, A1 - B1	-0.05548
Mean diff, A2 - B2	-0.0352
(A1 -B1) - (A2 - B2)	-0.02028
95% CI of difference	-0.1180 to 0.07744
(B1 - A1) - (B2 - A2)	0.02028
95% CI of difference	-0.07744 to 0.1180

[truncated: 2 more sheets: Fig. 4k, Fig. 4l]
