# Supplementary material for: Aging potentiates glioma-driven remodeling of cortico-hippocampal neuron-astrocyte dynamics
Source: Research Square preprint supplement (doi:10.21203/rs.3.rs-8725420/v1), 2026-02-11
Supplement: Supplementary file 6 [file f1abdfb6b767f5c0f069f0ba.xlsx]

## Sheet: Extended Data Fig. 1d
Two-way ANOVA	Ordinary
Alpha	0.05
Source of Variation	% of total variation	P value	P value summary	Significant?
Interaction	0.003933	0.9684	ns	No
Age	7.387	0.0923	ns	No
Treatment	3.713	0.2281	ns	No
ANOVA table	SS	DF	MS	F (DFn, DFd)	P value
Interaction	56.41	1	56.41	F (1, 36) = 0.001593	P=0.9684
Age	105936	1	105936	F (1, 36) = 2.991	P=0.0923
Treatment	53254	1	53254	F (1, 36) = 1.504	P=0.2281
Residual	1274917	36	35414
Difference between column means
Mean of Tumor	485.8
Mean of Control	558.8
Difference between means	-72.97
SE of difference	59.51
95% CI of difference	-193.7 to 47.72
Difference between row means
Mean of Young	470.8
Mean of Aged	573.8
Difference between means	-102.9
SE of difference	59.51
95% CI of difference	-223.6 to 17.77
Interaction CI
Mean diff, A1 - B1	-75.35
Mean diff, A2 - B2	-70.6
(A1 -B1) - (A2 - B2)	-4.75
95% CI of difference	-246.1 to 236.6
(B1 - A1) - (B2 - A2)	4.75
95% CI of difference	-236.6 to 246.1

## Sheet: Extended Data Fig. 1e
Two-way ANOVA	Ordinary
Alpha	0.05
Source of Variation	% of total variation	P value	P value summary	Significant?
Interaction	0.009042	0.9526	ns	No
Age	8.16	0.0806	ns	No
Treatment	0.9329	0.5471	ns	No
ANOVA table	SS	DF	MS	F (DFn, DFd)	P value
Interaction	2.662	1	2.662	F (1, 36) = 0.003581	P=0.9526
Age	2403	1	2403	F (1, 36) = 3.232	P=0.0806
Treatment	274.7	1	274.7	F (1, 36) = 0.3695	P=0.5471
Residual	26764	36	743.5
Difference between column means
Mean of Tumor	99.49
Mean of Control	104.7
Difference between means	-5.241
SE of difference	8.622
95% CI of difference	-22.73 to 12.25
Difference between row means
Mean of Young	94.36
Mean of Aged	109.9
Difference between means	-15.5
SE of difference	8.622
95% CI of difference	-32.99 to 1.986
Interaction CI
Mean diff, A1 - B1	-5.757
Mean diff, A2 - B2	-4.725
(A1 -B1) - (A2 - B2)	-1.032
95% CI of difference	-36.01 to 33.94
(B1 - A1) - (B2 - A2)	1.032
95% CI of difference	-33.94 to 36.01

## Sheet: Extended Data Fig. 1f
Two-way ANOVA	Ordinary
Alpha	0.05
Source of Variation	% of total variation	P value	P value summary	Significant?
Interaction	0.8769	0.5747	ns	No
Age	0.5486	0.6569	ns	No
Treatment	0.1355	0.8251	ns	No
ANOVA table	SS	DF	MS	F (DFn, DFd)	P value
Interaction	7304	1	7304	F (1, 36) = 0.3207	P=0.5747
Age	4569	1	4569	F (1, 36) = 0.2006	P=0.6569
Treatment	1129	1	1129	F (1, 36) = 0.04957	P=0.8251
Residual	819866	36	22774
Difference between column means
Mean of Tumor	265.9
Mean of Control	276.6
Difference between means	-10.63
SE of difference	47.72
95% CI of difference	-107.4 to 86.16
Difference between row means
Mean of Young	281.9
Mean of Aged	260.6
Difference between means	21.38
SE of difference	47.72
95% CI of difference	-75.41 to 118.2
Interaction CI
Mean diff, A1 - B1	-37.65
Mean diff, A2 - B2	16.4
(A1 -B1) - (A2 - B2)	-54.05
95% CI of difference	-247.6 to 139.5
(B1 - A1) - (B2 - A2)	54.05
95% CI of difference	-139.5 to 247.6

## Sheet: Extended Data Fig. 1g
Two-way ANOVA	Ordinary
Alpha	0.05
Source of Variation	% of total variation	P value	P value summary	Significant?
Interaction	0.008692	0.9552	ns	No
Age	0.3904	0.7069	ns	No
Treatment	1.732	0.43	ns	No
ANOVA table	SS	DF	MS	F (DFn, DFd)	P value
Interaction	1.653	1	1.653	F (1, 36) = 0.003197	P=0.9552
Age	74.26	1	74.26	F (1, 36) = 0.1436	P=0.7069
Treatment	329.5	1	329.5	F (1, 36) = 0.6371	P=0.4300
Residual	18615	36	517.1
Difference between column means
Mean of Tumor	106.5
Mean of Control	112.2
Difference between means	-5.74
SE of difference	7.191
95% CI of difference	-20.32 to 8.844
Difference between row means
Mean of Young	110.7
Mean of Aged	108
Difference between means	2.725
SE of difference	7.191
95% CI of difference	-11.86 to 17.31
Interaction CI
Mean diff, A1 - B1	-5.333
Mean diff, A2 - B2	-6.146
(A1 -B1) - (A2 - B2)	0.8132
95% CI of difference	-28.35 to 29.98
(B1 - A1) - (B2 - A2)	-0.8132
95% CI of difference	-29.98 to 28.35
