# Supplementary material for: Aging potentiates glioma-driven remodeling of cortico-hippocampal neuron-astrocyte dynamics
Source: Research Square preprint supplement (doi:10.21203/rs.3.rs-8725420/v1), 2026-02-11
Supplement: Supplementary file 7 [file f3dbe94d8fb2569275f70c4d.xlsx]

## Sheet: Young_Tumor_Exc_gseGO_BP_REVIGO
ID	Description	setSize	enrichmentScore	NES	pvalue	p.adjust	qvalue	rank	leading_edge	core_enrichment
GO:0035456	response to interferon-beta	39	0.853922	2.96984	3.97e-15	2.17e-11	2.05e-11	618	tags=51%, list=4%, signal=50%	Ifi204/Iigp1/Gbp3/Ifi207/Bst2/Gbp7/Gbp6/F830016B08Rik/Ifit1/Ifit3/Stat1/Oas1a/Xaf1/Ifitm3/Irgm1/Irgm2/Igtp/Ikbke/Shfl/Oas1c
GO:0045824	negative regulation of innate immune response	72	0.695455	2.8199	2.91e-13	7.96e-10	7.53e-10	685	tags=35%, list=4%, signal=33%	A2m/Ifi204/Ifi207/Tap1/H2-K1/H2-Q7/Nlrc5/Oas1a/Serping1/Isg15/Trim21/Parp14/Nmi/Stat2/Tap2/Tgfb1/H2-D1/Smpdl3b/Clec2d/Lgals9/H2-Q4/Dhx58/Drd2/Oas1c/H2-T22
GO:0048525	negative regulation of viral process	75	0.694016	2.90421	5.1e-13	9.31e-10	8.8e-10	170	tags=28%, list=1%, signal=28%	Oasl2/Ifi204/Ifi207/Bst2/Rsad2/Trim25/Oas2/Stat1/Oas1a/Eif2ak2/Trim30d/Cd74/Ifih1/Sp100/Isg15/Trim21/Ifitm3/Trim30a/Trim12a/Apobec3/Trim12c
GO:0001909	leukocyte mediated cytotoxicity	78	0.632331	2.78839	3.85e-11	4.22e-08	3.99e-08	685	tags=35%, list=4%, signal=33%	Tap1/H2-K1/H2-Q7/Fcgr2b/Cd1d1/Spi1/Fcgr1/Tap2/Fcgr3/Itgam/Ncf1/Tgfb1/Vav1/Rab27a/Ptprc/Ctsh/B2m/H2-D1/Clec2d/Ctsc/Lgals9/H2-Q4/Myd88/Raet1e/Tyrobp/Ptpn6/H2-T22
GO:0019884	antigen processing and presentation of exogenous antigen	30	0.832927	2.94795	3.73e-10	3.4e-07	3.21e-07	685	tags=60%, list=4%, signal=58%	H2-K1/H2-Q7/Fcgr2b/Ifi30/Cd74/Cd1d1/Fcgr1/Unc93b1/Ctss/Tap2/Fcgr3/Fcer1g/Mpeg1/B2m/H2-D1/H2-Q4/Tapbp/H2-T22
GO:0050830	defense response to Gram-positive bacterium	47	0.7009	2.4686	2.01e-09	1.28e-06	1.21e-06	685	tags=38%, list=4%, signal=37%	Gbp3/Gbp7/H2-K1/Gbp6/H2-Q7/Lyz2/Fgr/Ncf1/Myo1f/Mpeg1/B2m/H2-D1/H2-Q4/Rarres2/Tnfaip8/Myd88/Hmgb2/H2-T22
GO:0019882	antigen processing and presentation	71	0.612856	2.41256	4.91e-09	2.66e-06	2.51e-06	685	tags=37%, list=4%, signal=35%	Tap1/H2-K1/H2-Q7/Fcgr2b/Ifi30/Cd74/Cd1d1/Psmb8/Fcgr1/Unc93b1/Ctss/Tap2/Fcgr3/Fcer1g/Mpeg1/Rab27a/B2m/Rab32/H2-D1/Cd68/H2-Q4/Rftn1/Tapbp/Raet1e/Trem2/H2-T22
GO:0140888	interferon-mediated signaling pathway	61	0.647422	2.44874	8.94e-09	3.77e-06	3.56e-06	963	tags=36%, list=6%, signal=34%	Irf7/Oas2/Nlrc5/Stat1/Oas1a/Ifih1/Isg15/Ifitm3/Parp14/Irgm1/Rbm47/Stat2/Irgm2/Parp9/Igtp/Myd88/Ikbke/Oas1c/Tyk2/Trim56/Samhd1/Ifitm2
GO:0060760	positive regulation of response to cytokine stimulus	47	0.65646	2.31208	1.06e-07	3.07e-05	2.9e-05	784	tags=36%, list=5%, signal=35%	Irf7/Nlrc5/Cd74/Ifih1/Parp14/Irgm1/Rbm47/Irgm2/Parp9/Igtp/Axl/Csf1/Laptm5/Ikbke/Trem2/Tslp/Trim56
GO:0034340	response to type I interferon	53	0.646547	2.45605	1.76e-07	4.83e-05	4.56e-05	963	tags=38%, list=6%, signal=36%	Irf7/Oas2/Nlrc5/Stat1/Oas1a/Ifih1/Sp100/Isg15/Ifitm3/Rbm47/Stat2/Myd88/Ikbke/Shfl/Shmt2/Oas1c/Tyk2/Trim56/Samhd1/Ifitm2
GO:0001562	response to protozoan	22	0.813788	2.44676	2.24e-07	5.84e-05	5.52e-05	507	tags=41%, list=3%, signal=40%	Iigp1/Gbp3/Gbp7/Gbp6/Irgm2/Il4ra/Igtp/Irf8/Myd88
GO:0071346	cellular response to type II interferon	70	0.572053	2.2911	3.44e-07	7.96e-05	7.53e-05	386	tags=24%, list=2%, signal=24%	Gbp3/Ccl12/Gbp7/Gbp6/Vim/H2-Q7/Nlrc5/Stat1/Aqp4/Parp14/Irgm1/Irgm2/Parp9/Igtp/Irf8/Gbp5/Myo1c
GO:0002883	regulation of hypersensitivity	13	0.920863	2.57824	3.49e-07	7.96e-05	7.53e-05	685	tags=77%, list=4%, signal=74%	H2-K1/H2-Q7/Fcgr2b/Fcgr1/Fcgr3/Fcer1g/H2-D1/H2-Q4/Btk/H2-T22
GO:0006813	potassium ion transport	190	-0.552909	-1.52363	3.71e-07	8.12e-05	7.67e-05	2918	tags=33%, list=17%, signal=28%	Kcnmb4/Tsc1/Slc9a5/Kcnj2/Kcnh7/Crbn/Htr2a/Kcnq5/Wnk3/Slc12a6/Vps4b/Kcnc2/Kcnk1/Nalcn/Slc12a8/Kcnma1/Kcnd2/Slc9a9/Kcns2/Atp1b1/Kcnk2/Wnk4/Kcnip4/Ghitm/Kcnh1/Kcnb2/Plcb4/Kcnc1/Kcng3/Kcna4/Amigo1/Actn2/Rgs4/Kcnh4/Atp1a4/Slc12a2/Adcyap1/Kcns3/Kcnn2/Kcnh5/Dlg1/Kcna2/Slc9a6/Slc9a3/Kcnf1/Kcnt2/Lrrc55/Kcnj9/Kcnj3/Slc12a5/Oprk1/Abcc8/Atp1a1/Kcns1/Akap7/Alg10b/Akap5/Kcnj4/Kcnk4/Kcnip1/Kcng2/Kcnj11/Kcnv1
GO:0070664	negative regulation of leukocyte proliferation	71	0.550257	2.16614	6.79e-07	0.000137641	0.000130119	1099	tags=35%, list=6%, signal=33%	Ccl12/H2-K1/H2-Q7/Fcgr2b/Cd44/Cd274/Sdc4/Tgfb1/H2-D1/Lgals9/H2-Q4/Laptm5/Dlg5/Cd86/Tyrobp/Bcl6/Ptpn6/Btk/Btla/H2-T22/Rassf5/Cd37/Gnrh1/Tnfrsf13b/Vsir
GO:0060337	type I interferon-mediated signaling pathway	48	0.656336	2.36209	7.75e-07	0.000141394	0.000133667	963	tags=35%, list=6%, signal=34%	Irf7/Oas2/Nlrc5/Stat1/Oas1a/Ifih1/Isg15/Ifitm3/Rbm47/Stat2/Myd88/Ikbke/Oas1c/Tyk2/Trim56/Samhd1/Ifitm2
GO:0002347	response to tumor cell	31	0.70613	2.4918	9.22e-07	0.000156283	0.000147743	468	tags=26%, list=3%, signal=25%	H2-K1/H2-Q7/Cd274/Spi1/Tgfb1/H2-D1/H2-Q4/Laptm5
GO:0031341	regulation of cell killing	63	0.549799	2.14388	1.61e-06	0.000245302	0.000231896	685	tags=33%, list=4%, signal=32%	Tap1/H2-K1/H2-Q7/Cd1d1/Spi1/Tap2/Itgam/Tgfb1/Vav1/Ptprc/B2m/H2-D1/Clec2d/Lgals9/H2-Q4/Cd59a/Cfh/Raet1e/Tyrobp/Ccr5/H2-T22
GO:0042832	defense response to protozoan	20	0.821496	2.48874	1.89e-06	0.000279986	0.000264685	507	tags=45%, list=3%, signal=44%	Iigp1/Gbp3/Gbp7/Gbp6/Irgm2/Il4ra/Igtp/Irf8/Myd88
GO:1903557	positive regulation of tumor necrosis factor superfamily cytokine production	78	0.505756	2.23024	3.25e-06	0.000416501	0.000393739	685	tags=32%, list=4%, signal=31%	H2-K1/H2-Q7/Oas2/Fcgr2b/Oas1a/Ifih1/Fcgr3/Tlr3/Fcer1g/Stat3/Tgfb1/Plcg2/Ptprc/H2-D1/Lgals9/Cyba/H2-Q4/Myd88/Tyrobp/Cd84/Csf1r/Oas1c/Ccr5/Btk/H2-T22
GO:0002524	hypersensitivity	15	0.845282	2.42471	3.65e-06	0.000416501	0.000393739	685	tags=67%, list=4%, signal=64%	H2-K1/H2-Q7/Fcgr2b/Fcgr1/Fcgr3/Fcer1g/H2-D1/H2-Q4/Btk/H2-T22
GO:0032693	negative regulation of interleukin-10 production	10	0.914967	2.47014	3.99e-06	0.000442838	0.000418637	1099	tags=80%, list=6%, signal=75%	Fcgr2b/Cd274/Tyrobp/Trib2/Cd84/Jak3/Btk/Vsir
GO:0007416	synapse assembly	205	-0.533743	-1.47462	7.71e-06	0.0008119	0.00076753	3270	tags=33%, list=19%, signal=27%	Stau2/Ntrk3/Pclo/Pcdhb16/Il1rapl2/Nrg2/Snca/Myo6/Zdhhc2/2610042L04Rik/Cdh9/App/Slit2/Efnb1/Icam5/Nrg1/Sdcbp/Lingo2/Nlgn3/Mdga2/Ephb1/Gabrb3/Nrxn3/Ppp1r9a/Lrrtm4/Numb/Lrrn1/Mef2c/Reln/Npas4/Bdnf/Slitrk1/Gabra3/Gabrb2/Cacna1a/Adgrl1/Amigo1/Il1rap/Gabra5/Lrfn3/Ntng2/Syndig1/Il1rapl1/Chrnb2/Clstn1/Lrtm2/Fgf13/Abi3bp/Flrt2/Nptn/Slitrk2/Slitrk3/Arhgef9/Elavl2/Flrt1/Lrrn3/Lrp4/Gabra1/Akap5/Gpc4/Gpm6a/Lg…
GO:2001185	regulation of CD8-positive, alpha-beta T cell activation	19	0.830512	2.47466	9.1e-06	0.000922157	0.000871761	1099	tags=58%, list=6%, signal=54%	H2-K1/H2-Q7/Cd274/Runx1/Socs1/H2-D1/H2-Q4/Ptpn22/H2-T22/Irf1/Vsir
GO:0035455	response to interferon-alpha	20	0.79254	2.40102	1.1e-05	0.00105903	0.00100116	326	tags=45%, list=2%, signal=44%	Ifi204/Bst2/Ifit1/Oas1a/Eif2ak2/Ifitm3/Myc/Ifit2/Axl
GO:0010951	negative regulation of endopeptidase activity	74	0.476107	1.98387	1.43e-05	0.00130272	0.00123152	453	tags=16%, list=3%, signal=16%	Ifi204/Ifi207/Serpina3n/Serping1/Naip5/Cd44/Cflar/Serpinh1/Birc5/Serpinf1/Naip2/Mmp9
GO:0141084	inflammasome-mediated signaling pathway	38	0.6554	2.32603	2.86e-05	0.00227103	0.00214691	678	tags=37%, list=4%, signal=35%	Ifi204/Ifi207/Eif2ak2/Irgm1/Trim30a/Irgm2/Igtp/Plcg2/Gbp5/Myd88/Nlrp1b/Trem2/Ptpn22/Btk
GO:0002920	regulation of humoral immune response	24	0.717433	2.23024	3.31e-05	0.00244944	0.00231557	625	tags=38%, list=4%, signal=36%	A2m/Fcgr2b/Serping1/Masp1/Ptprc/Cd59a/Cfh/Trem2/Ptpn6
GO:0141085	regulation of inflammasome-mediated signaling pathway	35	0.653352	2.27555	4.54e-05	0.00331565	0.00313445	678	tags=37%, list=4%, signal=36%	Ifi204/Ifi207/Eif2ak2/Irgm1/Trim30a/Irgm2/Igtp/Plcg2/Gbp5/Myd88/Trem2/Ptpn22/Btk
GO:0032609	type II interferon production	73	0.470293	1.95645	5.54e-05	0.00393902	0.00372375	843	tags=26%, list=5%, signal=25%	H2-K1/H2-Q7/Isg15/Cd1d1/Cd274/Irgm1/Tlr3/Runx1/Irf8/H2-D1/Axl/Lgals9/H2-Q4/Rara/Laptm5/Ptpn22/Tyk2/Tcirg1/Tlr7
GO:0032815	negative regulation of natural killer cell activation	14	0.803529	2.23254	6.48e-05	0.00449248	0.00424696	685	tags=50%, list=4%, signal=48%	H2-K1/H2-Q7/Fgr/H2-D1/Lgals9/H2-Q4/H2-T22
GO:0002861	regulation of inflammatory response to antigenic stimulus	26	0.72009	2.35171	7.12e-05	0.00486977	0.00460364	685	tags=42%, list=4%, signal=41%	H2-K1/H2-Q7/Fcgr2b/Fcgr1/Fcgr3/Fcer1g/H2-D1/H2-Q4/Trem2/Btk/H2-T22
GO:0002437	inflammatory response to antigenic stimulus	43	0.545875	1.85683	8.91e-05	0.00595213	0.00562684	685	tags=30%, list=4%, signal=29%	H2-K1/H2-Q7/Fcgr2b/Fcgr1/Fcgr3/Fcer1g/H2-D1/Cd68/H2-Q4/Hmgb2/Trem2/Btk/H2-T22
GO:0046633	alpha-beta T cell proliferation	41	0.57938	1.99229	0.000244754	0.0136348	0.0128897	1099	tags=49%, list=6%, signal=46%	H2-K1/H2-Q7/Myc/Cd44/Cd274/Irgm1/Ptprc/H2-D1/Lgals9/H2-Q4/Dock2/Elf4/Ptpn22/Btla/H2-T22/Tyk2/Tgfbr2/Irf1/Il15/Vsir
GO:0098659	inorganic cation import across plasma membrane	87	-0.571883	-1.533	0.000254437	0.0137925	0.0130387	4370	tags=49%, list=25%, signal=37%	Slc39a14/Steap2/Fyn/Slc30a5/Pawr/Slc24a2/Ppp3ca/Cav1/Slc9a2/Slc31a1/Trpv3/Trpv6/Slc9a5/Kcnj2/Ppp3cc/Ppp3cb/Wnk3/Slc12a6/Trpm4/Slc12a8/Slc9a9/Atp1b1/Wnk4/Slc39a10/Cacna1a/Ppp3r1/Adrb1/Slc30a1/Atp1a4/Slc12a2/Dlg1/Slc8a3/Slc9a6/Cacna1f/Slc9a3/Slc8a2/Kcnj9/Kcnj3/Slc12a5/Atp1a1/Akap5/Kcnj4/Kcnj11
GO:0043903	regulation of biological process involved in symbiotic interaction	43	0.521391	1.77354	0.000270708	0.0143896	0.0136032	784	tags=30%, list=5%, signal=29%	Trim34a/Trim25/Trim30d/Cd74/Trim21/Ifitm3/Trim30a/Trim12a/Trim12c/Lgals1/Hs3st5/Fbln1/Trim56
GO:0070269	pyroptosis	23	0.696552	2.14998	0.000297321	0.0153569	0.0145176	995	tags=43%, list=6%, signal=41%	Gbp3/Naip5/Trim21/Gbp5/Naip2/Ninj1/Nlrp1b/Trem2/Casp8/Naip1
GO:0002418	immune response to tumor cell	21	0.724539	2.11417	0.00033491	0.0168223	0.015903	427	tags=29%, list=2%, signal=28%	H2-K1/H2-Q7/Cd274/Tgfb1/H2-D1/H2-Q4
GO:0044790	suppression of viral release by host	18	0.759469	2.23539	0.000364176	0.0178024	0.0168295	170	tags=33%, list=1%, signal=33%	Trim25/Trim30d/Trim21/Trim30a/Trim12a/Trim12c
GO:0006699	bile acid biosynthetic process	18	-0.766295	-1.74381	0.000384615	0.018311	0.0173103	1364	tags=39%, list=8%, signal=36%	Pex2/Malrd1/Prox1/Stard4/Cyp39a1/Slc27a2/Cyp7b1
GO:0007214	gamma-aminobutyric acid signaling pathway	28	-0.701033	-1.69599	0.00042974	0.020283	0.0191745	2352	tags=46%, list=14%, signal=40%	Gabrd/Gabrb3/Bdnf/Gabra3/Gabrb2/Cacna1a/Gabra5/Slc12a2/Htr1a/Gabra1/Gabra2/Gabra4/Gabrg2
GO:0032608	interferon-beta production	56	0.482318	1.79773	0.000613758	0.0270994	0.0256184	843	tags=25%, list=5%, signal=24%	Irf7/Oas2/Oas1a/Ifih1/Isg15/Nmi/Tlr3/Zc3hav1/Tradd/Hmgb2/Oas1c/Ptpn22/Trim56/Tlr7
GO:0044409	symbiont entry into host	68	0.436453	1.75055	0.000668349	0.0285876	0.0270253	504	tags=19%, list=3%, signal=19%	Trim34a/Trim25/Trim30d/Cd74/Naip5/Trim21/Ifitm3/Trim30a/Trim12a/Trim12c/Axl/Lgals1/Hs3st5
GO:0045214	sarcomere organization	34	-0.667685	-1.66026	0.000688791	0.0289003	0.0273209	2262	tags=32%, list=13%, signal=28%	Casq1/Neb/Prkd1/Mef2c/Csrp1/Tnnt2/Actn2/Mylk3/Prox1/Mypn/Six4
GO:0007409	axonogenesis	418	-0.446392	-1.255	0.000691495	0.0289003	0.0273209	4951	tags=37%, list=29%, signal=27%	Dclk1/Bmpr1b/Ptch1/Thy1/Kif5b/Snap91/Ank3/Mbp/Sema3d/Slc25a46/Pten/Actr3/Rtn4r/Unc5c/Atg7/Nefl/Ryk/Wnt7b/Klf7/Gli2/Cdh11/Igfals/C9orf72/Fbxo45/Auts2/Robo1/Tiam1/Cnp/Apbb2/Ctnna2/Unc5d/Cyfip1/Adcy10/Slit3/Epha4/Dag1/Cntn1/Dab1/Ttc8/Clasp2/Prkca/Sema4f/Nr4a3/Sema6d/Mapt/Rac1/Top2b/Nell2/Dscam/Sema4c/Ntrk3/Plxna1/Omg/Atp8a2/Mag/Spg11/Prtg/App/Scn1b/Slit2/Stxbp1/Zdhhc17/B4gat1/Kif5c/Etv1/Lgi1/Efnb1/E…
GO:0007215	glutamate receptor signaling pathway	45	-0.628922	-1.6055	0.000767928	0.0315746	0.029849	4355	tags=58%, list=25%, signal=43%	Grm8/Fyn/Tiam1/Grin2a/Kcnb1/Grm7/Grid2ip/Plcb1/Cx3cl1/Grm5/App/Sstr1/Grin2b/Dagla/Kalrn/Fmr1/Gria2/Camk2a/Cpeb4/Grm2/Grik1/Homer2/Plp1/Cdk5r1/Grm3/Frrs1l
GO:0035740	CD8-positive, alpha-beta T cell proliferation	13	0.810058	2.26801	0.000778551	0.0315746	0.029849	1099	tags=62%, list=6%, signal=58%	H2-K1/H2-Q7/H2-D1/H2-Q4/Ptpn22/H2-T22/Irf1/Vsir
GO:0098953	receptor diffusion trapping	14	-0.78584	-1.71453	0.000856684	0.0337435	0.0318994	1781	tags=50%, list=10%, signal=45%	Cacng3/Itgb3/Tspan9/Rdx/Camk2a/Gphn/Shisa6
GO:0043113	receptor clustering	70	-0.573997	-1.50923	0.000981141	0.0382414	0.0361515	2492	tags=29%, list=14%, signal=25%	Grik2/Grin2b/Tnfaip6/Lrrc7/Lrrtm4/Ptn/Nme7/Reln/Cacna1a/Dlg1/Gphn/Sorbs2/Slitrk3/Htr1a/Arhgef9/Lrp4/Akap5/Itga4/Frrs1l/Shisa6
GO:0050688	regulation of defense response to virus	50	0.426895	1.55574	0.00121394	0.0458368	0.0433318	1090	tags=28%, list=6%, signal=26%	Stat1/Ifnlr1/Irgm1/Irgm2/Apobec3/Parp9/Dtx3l/Igtp/Zc3hav1/Ptpn22/Cd37/Ccl5/Cgas/Il15
GO:0002507	tolerance induction	21	0.691765	2.01854	0.00122507	0.0459403	0.0434296	776	tags=48%, list=4%, signal=46%	H2-K1/H2-Q7/Cd274/Runx1/Tgfb1/H2-D1/H2-Q4/Cd86/H2-T22/Tgfbr2
GO:0001508	action potential	127	-0.516835	-1.40269	0.0013175	0.0484116	0.0457659	4101	tags=39%, list=24%, signal=30%	Kcnq3/Calm1/Grin2a/Kcnb1/Sod1/Slmap/Pawr/Tmem161b/Cav1/Calm3/Scn8a/Adra1a/Chrna7/Ntrk3/Scn1b/Kcnmb4/Kcnj2/Myh14/Ptpn3/P2rx7/Grik2/Grin2b/Kcnc2/Dmd/Trpm4/Kcnma1/Kcnd2/Scn2b/Hnrnpa1/Nrcam/Fmr1/Cacna2d1/Cacna1i/Slc4a3/Tac1/Chrnb2/Kcnn2/Dlg1/Kcna2/Fgf13/Atp2a2/Slc8a2/Scn1a/Scn4b/Gpr88/Scn2a/Chrna4/Kcnip1/Kcnj11

## Sheet: Aged_Tumor_Exc_gseGO_BP_REVIGO
ID	Description	setSize	enrichmentScore	NES	pvalue	p.adjust	qvalue	rank	leading_edge	core_enrichment
GO:0032252	secretory granule localization	32	-0.636642	-1.72799	0.000140987	0.0109096	0.0102297	4467	tags=66%, list=26%, signal=49%	Mecp2/Cadps/Syt4/Eipr1/Syt10/Unc13b/Myo5a/Kif1b/Map2/Kif5b/Rims1/Stxbp1/Ppfia2/Mapk8/Sybu/Cadps2/Tanc2/Snap25/Rasgrp1/Myo5c/Unc13c
GO:0044331	cell-cell adhesion mediated by cadherin	35	-0.61904	-1.6977	0.000188557	0.0139991	0.0131265	3415	tags=46%, list=20%, signal=37%	Afdn/Plekha7/Dennd6a/Cdh18/Cdh9/Cdh10/Nexmif/Cdh8/Vegfa/Cdh11/Cdh6/Fer/Cdh20/Cdh12/Cd2ap/Bmp6
GO:0007416	synapse assembly	205	-0.501438	-1.54842	9.49e-09	6.52e-06	6.11e-06	5679	tags=53%, list=33%, signal=36%	Ctnnb1/Cadm1/Lrtm2/Gabrg3/Lhfpl4/Efnb2/Adgrl3/Lrrc4/Adgrl1/Lrrtm3/Caprin1/Cdh2/Lrfn1/Vps35/Lrfn5/Ntrk3/Slitrk2/Efna5/Lzts3/Large1/Pik3r1/Lzts1/Fbxo45/Ube2v2/Gpc4/Mecp2/Stau2/Mapt/Abi3bp/Pdgfb/Ephb1/Gnpat/Dock7/Akap5/Shank3/Nrg1/Lrrtm4/Snca/Setd5/App/Nrxn1/Lingo2/Ntn1/Clstn1/Sdcbp/Mycbp2/Eif4g1/Lrrn1/Il1rapl2/Gsk3b/Sdk2/Grid2/Gap43/Chrnb2/Slc25a46/Nrg3/Slitrk3/Lrp4/Efnb1/Ogt/Ptprd/Ntng2/Magi2/Epha…
GO:0035264	multicellular organism growth	181	-0.447768	-1.37587	0.000230127	0.0164197	0.0153963	5584	tags=48%, list=32%, signal=33%	Zmpste24/Pcnt/Atm/Ercc5/Ctc1/Ncor1/Tnks2/Kdm2a/Hdac3/Sgip1/Fosl2/Wdr11/Large1/Atxn2/Creb1/Smpd3/Hsf1/Wwtr1/Alms1/Flt3/Atp1a3/Sod1/Ercc6/Stat5b/Bloc1s6/Apba1/Gpr21/Npr2/Sgpl1/Nipbl/Fto/Atrx/App/Kdm6a/Mbd5/Adarb1/Ghr/Rai1/Sos1/Bbs2/Icmt/Heg1/Rbbp6/Xrcc2/Pik3ca/Pou3f2/Zfp950/Adrb1/Ext1/Add1/Stil/Ptch1/Gpd2/Npy1r/Pantr2/Celf1/Meg3/Pde4d/Kmt2c/Wdr48/Slc4a10/Atp8a2/Gigyf2/Socs2/Etnk2/Plekha1/Dmd/Plag1/…
GO:0019827	stem cell population maintenance	166	-0.442771	-1.3565	0.000348605	0.0233566	0.0219008	5431	tags=46%, list=31%, signal=32%	Rest/Elavl1/Med12/Med10/Foxo3/Cdh2/Ing1/Bmpr1a/Ddx6/Cnot3/Actl6b/Panct2/Vangl2/Kdm3a/Srrt/Cnot1/Wdr47/Smarcc1/Crebbp/Zfp36l2/Smc3/Hdac2/Prox1/Bcl7c/Sox9/Ldb2/Ss18/Nipbl/Prdm16/Smarcd1/Zfp322a/Kat6a/Smc1a/Yap1/Stag2/Smarce1/Nfib/Rbbp4/Zc3h13/Cdc73/Ogt/Rtf1/Brms1l/Sinhcaf/Phf10/Jmjd1c/Ptn/Hook3/Tut4/Sav1/Kit/Mettl14/Eif4e/Taf5l/Dis3l2/Cnot2/Sap130/Smc5/Mapk8/Pcm1/Arid4b/Pou5f1/Apc/Rbpj/Med30/Braf/L…
GO:0050803	regulation of synapse structure or activity	287	-0.422206	-1.31655	6.26e-05	0.00577966	0.00541943	5777	tags=45%, list=33%, signal=31%	Frmpd4/Grin2b/Cntnap4/Ctnnb1/Homer1/Egln1/Itgb1/Lrtm2/Lhfpl4/Adgrl3/Rapgef4/Nrp2/Ctnna2/Adgrl1/Lrrtm3/Caprin1/Itpka/Cdh2/Lrfn1/Vps35/Lrfn5/Ntrk3/Slitrk2/Adam10/Efna5/Myo5b/Lzts3/Pik3r1/Lzts1/Ube2v2/Gpc4/Mecp2/Stau2/Ngef/Abi3bp/Ephb1/Hnrnpk/Cyfip1/Fyn/Chrna7/Neurod2/Disc1/Shank3/Nrg1/Lrrtm4/Snca/Setd5/App/Nrxn1/Afdn/Cask/Ywhaz/Lingo2/Mfn1/Ntn1/Clstn1/Hnrnpm/Mycbp2/Eif4g1/Dnm1l/Lrrn1/Il1rapl2/Gsk3b…
GO:0050807	regulation of synapse organization	280	-0.421277	-1.31245	0.000111114	0.00884726	0.00829584	5777	tags=46%, list=33%, signal=31%	Frmpd4/Grin2b/Cntnap4/Ctnnb1/Homer1/Egln1/Itgb1/Lrtm2/Lhfpl4/Adgrl3/Rapgef4/Nrp2/Ctnna2/Adgrl1/Lrrtm3/Caprin1/Itpka/Cdh2/Lrfn1/Vps35/Lrfn5/Ntrk3/Slitrk2/Adam10/Efna5/Myo5b/Lzts3/Pik3r1/Lzts1/Ube2v2/Gpc4/Mecp2/Stau2/Ngef/Abi3bp/Ephb1/Hnrnpk/Cyfip1/Fyn/Chrna7/Neurod2/Disc1/Shank3/Nrg1/Lrrtm4/Snca/Setd5/App/Nrxn1/Afdn/Cask/Ywhaz/Lingo2/Mfn1/Ntn1/Clstn1/Hnrnpm/Mycbp2/Eif4g1/Dnm1l/Lrrn1/Il1rapl2/Gsk3b…
GO:0044089	positive regulation of cellular component biogenesis	457	-0.389161	-1.23044	0.000490003	0.0307268	0.0288118	5832	tags=41%, list=34%, signal=28%	Pak1/Wipi1/Brk1/Sass6/Bid/Stx18/Grb2/Ndel1/Lrtm2/Tek/Atm/Cdc42ep3/Sh3glb1/Hsp90aa1/Ahr/Arpc2/Adgrl3/Atp7a/Tapt1/Mapre1/Snx18/Gnl3l/Arhgap35/Twf2/Adgrl1/Lrrtm3/P2rx7/Evl/Ripor2/Terf1/Caprin1/Nck1/Lims1/Ntrk3/Slitrk2/Akap9/Syk/Tpr/Efna5/G3bp2/Fam98a/Myo5b/Pik3r1/Togaram1/Rab3gap1/Ube2v2/Creb1/Clip1/Mecp2/Stau2/Mapt/Smpd3/Smad4/Hsf1/Cnot1/Prkd1/Snx4/Ephb1/Rhoq/Cyfip1/Pde4dip/Snx9/Ambra1/Tesk1/Sox9/C…
GO:0002418	immune response to tumor cell	21	0.469725	1.83518	0.000426853	0.0275898	0.0258702	595	tags=38%, list=3%, signal=37%	H2-Q7/H2-Q4/H2-K1/Cd274/Ulbp1/H2-D1/Adam15/Tgfb1
GO:0002507	tolerance induction	21	0.474175	1.85256	0.000347696	0.0233566	0.0219008	661	tags=48%, list=4%, signal=46%	H2-Q7/H2-Q4/H2-K1/Cd274/Runx1/H2-D1/H2-T22/Cd86/Tgfb1/Tgfbr2
GO:0036037	CD8-positive, alpha-beta T cell activation	26	0.441953	1.98641	0.000193497	0.0141743	0.0132909	545	tags=35%, list=3%, signal=34%	H2-Q7/H2-Q4/H2-K1/Cd274/Socs1/Igtp/Runx1/H2-D1/H2-T22
GO:0032607	interferon-alpha production	27	0.433473	1.98678	0.000402749	0.0263417	0.0246999	161	tags=22%, list=1%, signal=22%	Irf7/Ifih1/Stat1/Nmi/Zc3hav1/Tlr3
GO:0001787	natural killer cell proliferation	18	0.529589	1.99979	0.000276461	0.0194728	0.0182591	545	tags=39%, list=3%, signal=38%	H2-Q7/H2-Q4/H2-K1/Elf4/H2-D1/Il15/H2-T22
GO:0032647	regulation of interferon-alpha production	25	0.456055	2.01111	0.00010845	0.00876215	0.00821604	161	tags=24%, list=1%, signal=24%	Irf7/Ifih1/Stat1/Nmi/Zc3hav1/Tlr3
GO:0002347	response to tumor cell	31	0.438319	2.04671	7.84e-05	0.00683716	0.00641103	704	tags=32%, list=4%, signal=31%	H2-Q7/H2-Q4/H2-K1/Cd274/Ulbp1/Laptm5/H2-D1/Adam15/Tgfb1/Spi1
GO:0141060	disruption of anatomical structure in another organism	29	0.462285	2.09317	2.23e-05	0.00249611	0.00234054	465	tags=31%, list=3%, signal=30%	Gbp7/Gbp3/Irgm2/Gbp5/Ncf1/Igtp/Lyz2/Cxcl14/Ninj1
GO:0032731	positive regulation of interleukin-1 beta production	34	0.419822	2.10333	0.000167841	0.0128072	0.012009	336	tags=32%, list=2%, signal=32%	Ifi204/Ifi213/Ifi207/Mndal/Gbp5/Ccr5/Tyrobp/Casp8/Naip5/Nlrp1b/Stat3
GO:0035740	CD8-positive, alpha-beta T cell proliferation	13	0.613377	2.10701	0.000497759	0.0307268	0.0288118	545	tags=38%, list=3%, signal=37%	H2-Q7/H2-Q4/H2-K1/H2-D1/H2-T22
GO:0070269	pyroptosis	23	0.513148	2.12611	5.85e-05	0.00564139	0.00528978	465	tags=35%, list=3%, signal=34%	Gbp3/Trim21/Gbp5/Naip2/Casp8/Naip5/Nlrp1b/Ninj1
GO:0046597	negative regulation of viral entry into host cell	22	0.533801	2.21554	2.45e-05	0.00251103	0.00235453	107	tags=32%, list=1%, signal=32%	Ifitm3/Trim25/Trim30d/Trim56/Trim12a/Trim30a/Trim12c
GO:0035457	cellular response to interferon-alpha	13	0.64512	2.21605	0.000184218	0.0138643	0.0130002	359	tags=46%, list=2%, signal=45%	Ifit1/Oas1a/Ifi204/Ifit2/Myc/Axl
GO:0002861	regulation of inflammatory response to antigenic stimulus	26	0.493248	2.21696	1.97e-05	0.00238688	0.00223812	565	tags=38%, list=3%, signal=37%	H2-Q7/H2-Q4/H2-K1/Gpx1/Fcgr2b/Fcgr1/Fcer1g/H2-D1/H2-T22/Npy
GO:0060338	regulation of type I interferon-mediated signaling pathway	33	0.481772	2.24297	3.37e-06	0.000475171	0.000445555	201	tags=21%, list=1%, signal=21%	Nlrc5/Irf7/Oas1a/Isg15/Stat2/Trim56/Rbm47
GO:0044790	suppression of viral release by host	18	0.599713	2.26459	2.09e-05	0.00244205	0.00228985	107	tags=39%, list=1%, signal=39%	Trim21/Trim25/Trim30d/Trim56/Trim12a/Trim30a/Trim12c
GO:0016045	detection of bacterium	11	0.701485	2.2663	0.000289237	0.0198633	0.0186253	386	tags=55%, list=2%, signal=53%	H2-Q7/H2-Q4/H2-K1/Naip2/Naip5/H2-D1
GO:0032815	negative regulation of natural killer cell activation	14	0.625461	2.28108	9.5e-05	0.00778913	0.00730366	545	tags=43%, list=3%, signal=42%	H2-Q7/H2-Q4/H2-K1/Lgals9/H2-D1/H2-T22
GO:2001185	regulation of CD8-positive, alpha-beta T cell activation	19	0.630464	2.36315	4.95e-06	0.000679874	0.0006375	545	tags=42%, list=3%, signal=41%	H2-Q7/H2-Q4/H2-K1/Cd274/Socs1/Runx1/H2-D1/H2-T22
GO:0032693	negative regulation of interleukin-10 production	10	0.760476	2.36324	0.000118511	0.00930143	0.0087217	409	tags=50%, list=2%, signal=49%	Cd274/Jak3/Tyrobp/Fcgr2b/Cd84
GO:0050829	defense response to Gram-negative bacterium	32	0.514185	2.44618	1.76e-06	0.000285182	0.000267408	626	tags=41%, list=4%, signal=39%	Iigp1/Irgm2/Irgm1/Igtp/Ighm/Naip5/B2m/Lyz2/Tslp/Rarres2/Npy/Hmgb2/Mpeg1
GO:1903901	negative regulation of viral life cycle	25	0.560519	2.47178	6.28e-07	0.000150008	0.000140658	107	tags=32%, list=1%, signal=32%	Ifitm3/Bst2/Trim25/Trim30d/Trim56/Trim12a/Trim30a/Trim12c
GO:0141086	negative regulation of inflammasome-mediated signaling pathway	18	0.667472	2.52046	1.04e-06	0.000191647	0.000179702	157	tags=44%, list=1%, signal=44%	Ifi204/Ifi213/Ifi207/Irgm2/Mndal/Trim30a/Irgm1/Igtp
GO:0060333	type II interferon-mediated signaling pathway	18	0.687422	2.59579	4.53e-07	0.000119172	0.000111745	157	tags=39%, list=1%, signal=39%	Nlrc5/Parp14/Stat1/Irgm2/Parp9/Irgm1/Igtp
GO:0002474	antigen processing and presentation of peptide antigen via MHC class I	28	0.61488	2.72501	1.5e-08	8.24e-06	7.73e-06	626	tags=50%, list=4%, signal=48%	H2-Q7/Tap1/H2-Q4/H2-K1/Ulbp1/Mill2/Tap2/Tapbp/Fcgr1/Fcer1g/B2m/H2-D1/H2-T22/Mpeg1
GO:0002863	positive regulation of inflammatory response to antigenic stimulus	14	0.749957	2.73512	5.75e-07	0.000143472	0.00013453	545	tags=50%, list=3%, signal=48%	H2-Q7/H2-Q4/H2-K1/Fcgr1/Fcer1g/H2-D1/H2-T22
GO:0035455	response to interferon-alpha	20	0.71743	2.74389	4.9e-09	3.85e-06	3.61e-06	359	tags=45%, list=2%, signal=44%	Ifit1/Oas1a/Ifitm3/Bst2/Ifi204/Eif2ak2/Ifit2/Myc/Axl
GO:0031342	negative regulation of cell killing	26	0.628857	2.82647	4.16e-08	2.06e-05	1.93e-05	595	tags=50%, list=3%, signal=48%	H2-Q7/Tap1/Clec2d/H2-Q4/H2-K1/Ptprc/Tap2/Lgals9/Serpinb9/Arrb2/H2-D1/H2-T22/Tgfb1
GO:0001794	type IIa hypersensitivity	11	0.875588	2.82878	9.61e-08	3.19e-05	2.99e-05	545	tags=73%, list=3%, signal=70%	H2-Q7/H2-Q4/H2-K1/Fcgr2b/Fcgr1/Fcer1g/H2-D1/H2-T22
GO:0002716	negative regulation of natural killer cell mediated immunity	18	0.7917	2.98956	1.08e-09	1.19e-06	1.12e-06	595	tags=67%, list=3%, signal=64%	H2-Q7/Tap1/Clec2d/H2-Q4/H2-K1/Tap2/Lgals9/Serpinb9/Arrb2/H2-D1/H2-T22/Tgfb1
GO:0001562	response to protozoan	22	0.776899	3.22452	3.52e-11	6.44e-08	6.04e-08	380	tags=41%, list=2%, signal=40%	Gbp7/Gbp3/Iigp1/Gbp6/Irgm2/Igtp/Ccdc88b/Cd37/Il4ra
GO:0035458	cellular response to interferon-beta	32	0.848441	4.03636	9.37e-20	5.15e-16	4.82e-16	157	tags=50%, list=1%, signal=50%	Ifit1/Gbp7/Gbp3/Oas1a/Ifit3/Iigp1/F830016B08Rik/Ifi204/Gbp6/Stat1/Ifi213/Ifi207/Irgm2/Mndal/Irgm1/Igtp

## Sheet: Young_Tumor_Inh_gseGO_BP_REVIGO
ID	Description	setSize	enrichmentScore	NES	pvalue	p.adjust	qvalue	rank	leading_edge	core_enrichment
GO:0019884	antigen processing and presentation of exogenous antigen	30	0.819545	2.64165	9.81e-10	3.92e-07	3.51e-07	662	tags=47%, list=4%, signal=45%	H2-K1/Cd74/H2-Q4/Mpeg1/Ctss/Fcgr2b/B2m/H2-D1/Fcer1g/Fcgr1/H2-Q6/Unc93b1/Ifi30/Tap2
GO:0001794	type IIa hypersensitivity	13	0.960288	2.59866	4.66e-11	4.34e-08	3.89e-08	297	tags=62%, list=2%, signal=60%	H2-K1/C3/H2-Q4/Fcgr2b/H2-D1/Fcer1g/Fcgr1/H2-Q6
GO:0031342	negative regulation of cell killing	27	0.816758	2.57436	2.37e-09	6.99e-07	6.25e-07	1201	tags=52%, list=7%, signal=48%	H2-K1/Clec2d/H2-Q4/Tap1/Lgals9/H2-D1/Cd59a/H2-Q6/Serpinb9/Ptprc/Tap2/Tgfb1/Havcr2/Nckap1l
GO:0035456	response to interferon-beta	35	0.737619	2.47203	6.09e-08	9.73e-06	8.71e-06	1348	tags=49%, list=8%, signal=45%	Ifitm3/Ifit1/Bst2/Gbp3/Stat1/Gbp7/Iigp1/Xaf1/Irgm1/Igtp/Ifit3/Irgm2/Shfl/Gbp6/Irf1/Ifitm7/Ifitm2
GO:0032815	negative regulation of natural killer cell activation	14	0.897535	2.46468	2.61e-07	3.18e-05	2.84e-05	1082	tags=50%, list=7%, signal=47%	H2-K1/H2-Q4/Lgals9/H2-D1/H2-Q6/Havcr2/Pglyrp1
GO:0002507	tolerance induction	21	0.819057	2.46393	2.52e-07	3.13e-05	2.8e-05	877	tags=43%, list=5%, signal=41%	H2-K1/H2-Q4/Runx1/Cd86/H2-D1/H2-Q6/Cd274/Tgfb1/Havcr2
GO:0002698	negative regulation of immune effector process	80	0.652297	2.45644	4.37e-11	4.34e-08	3.89e-08	1201	tags=35%, list=7%, signal=33%	A2m/H2-K1/Bst2/Parp3/Clec2d/H2-Q4/Serping1/Jak3/Fcgr2b/Tap1/Lgals9/H2-D1/Cd59a/H2-Q6/Il4ra/Grn/Serpinb9/Ptprc/Angpt1/Bcl6/Tgfb2/Tap2/Tgfb1/Havcr2/Spi1/Irf1/Pglyrp1/Nckap1l
GO:0048525	negative regulation of viral process	67	0.650688	2.43533	2.59e-09	7.25e-07	6.49e-07	1018	tags=33%, list=6%, signal=31%	Ifitm3/Oasl2/Bst2/Cd74/Trim30d/Isg15/Trim30a/Apobec3/Ifih1/Stat1/Trim12a/Sp100/Eif2ak2/Trim25/Trim12c/Trim14/Shfl/Rsad2/Zc3hav1/Oas2/Trim8/Prox1
GO:0001787	natural killer cell proliferation	18	0.84184	2.41995	5.76e-07	6.44e-05	5.76e-05	1174	tags=44%, list=7%, signal=41%	H2-K1/Elf4/H2-Q4/Gm36723/H2-D1/H2-Q6/Flt3l/Tyk2
GO:2001187	positive regulation of CD8-positive, alpha-beta T cell activation	12	0.904231	2.36873	9.35e-07	9.02e-05	8.07e-05	297	tags=42%, list=2%, signal=41%	H2-K1/H2-Q4/Runx1/H2-D1/H2-Q6
GO:0016045	detection of bacterium	12	0.885858	2.3206	4.15e-06	0.000305632	0.000273475	297	tags=50%, list=2%, signal=49%	H2-K1/H2-Q4/Naip5/H2-D1/Ssc5d/H2-Q6
GO:0140888	interferon-mediated signaling pathway	58	0.613413	2.22713	4e-07	4.76e-05	4.26e-05	1459	tags=34%, list=9%, signal=32%	Ifitm3/Isg15/Ifih1/Stat1/Rbm47/Irf7/Nlrc5/Stat2/Irgm1/Igtp/Irgm2/Parp14/Oas2/Parp9/Irf1/Tyk2/Usp29/Ifitm7/Ifitm2/Myd88
GO:0002832	negative regulation of response to biotic stimulus	86	0.587484	2.19005	3.71e-09	9.43e-07	8.44e-07	877	tags=27%, list=5%, signal=25%	A2m/H2-K1/Isg15/Clec2d/H2-Q4/Serping1/Nlrc5/Tap1/Stat2/Lgals9/Irgm1/Igtp/H2-D1/H2-Q6/Irgm2/Grn/Serpinb9/Parp14/Nmi/Drd2/Tap2/Tgfb1/Havcr2
GO:0031341	regulation of cell killing	59	0.6005	2.18567	1e-06	9.44e-05	8.45e-05	907	tags=34%, list=5%, signal=32%	H2-K1/Ccr5/Clec2d/H2-Q4/Itgam/Tap1/Lgals9/B2m/Cfh/H2-D1/Cd59a/Crtam/Vav1/H2-Q6/Serpinb9/Ptprc/Tap2/Tgfb1/Havcr2/Spi1
GO:0035458	cellular response to interferon-beta	28	0.682453	2.16792	3.03e-05	0.00154304	0.00138068	330	tags=32%, list=2%, signal=32%	Ifit1/Gbp3/Stat1/Gbp7/Iigp1/Irgm1/Igtp/Ifit3/Irgm2
GO:0019882	antigen processing and presentation	71	0.573121	2.15846	2.17e-07	2.75e-05	2.46e-05	1210	tags=32%, list=7%, signal=30%	H2-K1/Cd74/H2-Q4/Mpeg1/Psmb8/Ctss/Fcgr2b/Tap1/B2m/H2-D1/Fcer1g/Wdfy4/Fcgr1/H2-Q6/Unc93b1/Trem2/Icam1/Ifi30/Tap2/Cd68/Rftn1/Rab3c/Thbs1
GO:0032613	interleukin-10 production	35	0.639254	2.14237	1.94e-05	0.00103194	0.000923366	392	tags=31%, list=2%, signal=31%	Isg15/Jak3/Rbm47/Fcgr2b/Stat3/Lgals9/Fcer1g/Plcg2/Trem2/Cd274/Prkcd
GO:0060337	type I interferon-mediated signaling pathway	45	0.616333	2.10386	1.2e-05	0.00067089	0.000600302	1459	tags=31%, list=9%, signal=28%	Ifitm3/Isg15/Ifih1/Stat1/Rbm47/Irf7/Nlrc5/Stat2/Oas2/Tyk2/Usp29/Ifitm7/Ifitm2/Myd88
GO:0070269	pyroptosis	19	0.723623	2.1036	0.00025583	0.0081184	0.00726421	956	tags=37%, list=6%, signal=35%	Gbp3/Naip5/Trem2/Casp8/Casp3/Gbp5/Nlrp1b
GO:0042832	defense response to protozoan	18	0.730579	2.10012	0.000352448	0.0101125	0.00904855	983	tags=56%, list=6%, signal=52%	Gbp3/Gbp7/Iigp1/Igtp/Irgm2/Il4ra/Cd37/Batf2/Irf8/Gbp6
GO:0001562	response to protozoan	19	0.721886	2.09855	0.000289271	0.00883039	0.00790129	983	tags=53%, list=6%, signal=50%	Gbp3/Gbp7/Iigp1/Igtp/Irgm2/Il4ra/Cd37/Batf2/Irf8/Gbp6
GO:0035455	response to interferon-alpha	20	0.702669	2.09501	0.000714975	0.0176224	0.0157682	1553	tags=45%, list=9%, signal=41%	Ifitm3/Ifit1/Bst2/Eif2ak2/Ifit2/Ifitm7/Ifitm2/Axl/Traf3ip3
GO:0006911	phagocytosis, engulfment	40	0.62512	2.07991	1.47e-05	0.000804723	0.000720053	1210	tags=35%, list=7%, signal=33%	C3/Bin2/Itgam/Fcgr2b/Fcer1g/Fcgr1/Plcg2/Trem2/Gulp1/Aif1/Megf10/Abca7/Nckap1l/Thbs1
GO:0140894	endolysosomal toll-like receptor signaling pathway	32	0.63341	2.06707	0.000208047	0.00708026	0.0063353	1459	tags=34%, list=9%, signal=31%	Pik3ap1/Cd86/Unc93b1/Colec12/Rsad2/Havcr2/Rftn1/Irf1/Tlr3/Nr1h4/Myd88
GO:0002347	response to tumor cell	32	0.63263	2.06452	0.000220871	0.00738002	0.00660352	907	tags=34%, list=5%, signal=33%	H2-K1/H2-Q4/H2-D1/Crtam/H2-Q6/Cd274/Laptm5/Notch2/Tgfb1/Havcr2/Spi1
GO:0002861	regulation of inflammatory response to antigenic stimulus	27	0.653463	2.05967	7.79e-05	0.00313418	0.00280441	329	tags=33%, list=2%, signal=33%	H2-K1/C3/H2-Q4/Fcgr2b/H2-D1/Fcer1g/Fcgr1/H2-Q6/Trem2
GO:0060252	positive regulation of glial cell proliferation	25	0.660662	2.05738	0.000222917	0.00738002	0.00660352	86	tags=12%, list=1%, signal=12%	Gfap/Vim/Ntn1
GO:0006925	inflammatory cell apoptotic process	18	0.713719	2.05166	0.000667249	0.0168165	0.0150471	689	tags=28%, list=4%, signal=27%	Cd44/Ccr5/Itgam/Fcgr2b/Pik3cd
GO:0001767	establishment of lymphocyte polarity	11	0.806138	2.04091	0.000480862	0.0128728	0.0115184	1038	tags=36%, list=6%, signal=34%	Crtam/Dock8/Dock2/Flot2
GO:0051607	defense response to virus	201	0.481868	2.03961	8.69e-12	3.95e-08	3.53e-08	1059	tags=21%, list=6%, signal=20%	Ifitm3/Oasl2/Ifit1/Ddx60/Bst2/Trim30d/Isg15/Trim30a/Apobec3/Ifih1/Stat1/Gbp7/Irf7/Stat2/Apobec1/Cd86/Trim12a/Dtx3l/Irgm1/Igtp/Ifit3/Ifit3b/Unc93b1/Eif2ak2/Irgm2/Ptprc/Trim25/Trim12c/Gbp5/Cd37/Shfl/Rsad2/Rnf135/Zc3hav1/Il10rb/Oas2/Rtp4/Ifit2/Nlrp1b/Parp9/Trim8/Irf1/Tlr3
GO:0014002	astrocyte development	26	0.650836	2.03687	0.000242693	0.00789457	0.00706393	699	tags=27%, list=4%, signal=26%	Gfap/Vim/Ror1/Trem2/Grn/Csf1r/C1qa
GO:0046597	negative regulation of viral entry into host cell	22	0.686087	2.03436	0.000297544	0.00894369	0.00800267	1348	tags=45%, list=8%, signal=42%	Ifitm3/Cd74/Trim30d/Trim30a/Trim12a/Trim25/Trim12c/Trim8/Ifitm7/Ifitm2
GO:0001906	cell killing	105	0.532811	2.03062	5.53e-08	9.1e-06	8.15e-06	907	tags=31%, list=5%, signal=30%	H2-K1/C3/Gbp3/Ccr5/Clec2d/Gbp7/H2-Q4/Itgam/Lyz2/Fcgr2b/Tap1/Lgals9/B2m/Igtp/Cfh/H2-D1/Cd59a/Crtam/Vav1/Ctsh/Fcgr1/H2-Q6/Irgm2/Ctsc/Ncf1/Serpinb9/Ptprc/Gbp5/Tap2/Tgfb1/Havcr2/Stxbp2/Spi1
GO:0044319	wound healing, spreading of cells	25	0.647225	2.01554	0.000375187	0.0105486	0.00943871	371	tags=20%, list=2%, signal=20%	Cd44/Pdpn/Flna/Arhgap24/Ccn1
GO:0002396	MHC protein complex assembly	11	0.791822	2.00466	0.000908775	0.0210979	0.0188781	297	tags=45%, list=2%, signal=45%	H2-K1/H2-Q4/B2m/H2-D1/H2-Q6
GO:0034340	response to type I interferon	51	0.583696	2.00188	7.27e-06	0.000458891	0.000410609	1459	tags=31%, list=9%, signal=29%	Ifitm3/Isg15/Ifih1/Stat1/Rbm47/Irf7/Nlrc5/Stat2/Sp100/Shfl/Oas2/Tyk2/Usp29/Ifitm7/Ifitm2/Myd88
GO:0035740	CD8-positive, alpha-beta T cell proliferation	14	0.725169	1.99135	0.00245496	0.0448873	0.0401644	1035	tags=36%, list=6%, signal=34%	H2-K1/H2-Q4/H2-D1/H2-Q6/Irf1
GO:0031664	regulation of lipopolysaccharide-mediated signaling pathway	20	0.664005	1.97974	0.00228074	0.0425358	0.0380604	421	tags=30%, list=3%, signal=29%	Trim30d/Ly86/Trim30a/Trim12a/Bmp6/Trim12c
GO:1902254	negative regulation of intrinsic apoptotic signaling pathway by p53 class mediator	18	0.683226	1.964	0.00186607	0.0363786	0.032551	29	tags=11%, list=0%, signal=11%	Cd44/Cd74
GO:0002424	T cell mediated immune response to tumor cell	10	0.78258	1.96166	0.00256487	0.0465923	0.0416901	297	tags=40%, list=2%, signal=39%	H2-K1/H2-Q4/H2-D1/H2-Q6
GO:0060100	positive regulation of phagocytosis, engulfment	12	0.748167	1.95991	0.00172301	0.0342987	0.0306899	1201	tags=50%, list=7%, signal=46%	C3/Fcgr1/Plcg2/Trem2/Abca7/Nckap1l
GO:0070664	negative regulation of leukocyte proliferation	73	0.519073	1.95438	9.05e-06	0.00054423	0.000486968	988	tags=29%, list=6%, signal=27%	Cd44/H2-K1/H2-Q4/Fcgr2b/Inpp5d/Cd86/Lgals9/H2-D1/Sdc4/Crtam/H2-Q6/Sox11/Casp3/Cd274/Bcl6/Laptm5/Btla/Cd37/Tgfb1/Havcr2/Btk
GO:0002920	regulation of humoral immune response	25	0.625566	1.94809	0.000827288	0.0195303	0.0174754	547	tags=36%, list=3%, signal=35%	A2m/C3/Serping1/Fcgr2b/Cfh/Cd59a/Trem2/Ptprc/Cd37
GO:0061684	chaperone-mediated autophagy	11	0.766087	1.93951	0.00184585	0.0361103	0.0323109	334	tags=18%, list=2%, signal=18%	Gfap/Synpo2
GO:0009595	detection of biotic stimulus	24	0.626269	1.92235	0.00119941	0.0258103	0.0230946	329	tags=33%, list=2%, signal=33%	H2-K1/H2-Q4/Naip5/H2-D1/Crtam/Ssc5d/H2-Q6/Trem2
GO:0034341	response to type II interferon	79	0.504762	1.90745	1.12e-05	0.000655931	0.000586916	1348	tags=32%, list=8%, signal=29%	Ifitm3/Bst2/Cd74/Vim/Gbp3/Aqp4/Stat1/Gbp7/Nlrc5/Irgm1/Igtp/Sp100/Irgm2/Gbp5/Parp14/Shfl/Stxbp2/Irf8/Parp9/Gbp6/Irf1/Dapk3/Tyk2/Ifitm7/Ifitm2
GO:0002460	adaptive immune response based on somatic recombination of immune receptors built from immunoglobulin superfamily domains	190	0.445098	1.90487	1.61e-08	2.91e-06	2.61e-06	1497	tags=27%, list=9%, signal=25%	C4b/H2-K1/Parp3/C3/Cd74/H2-Q4/Serping1/Jak3/Irf7/Fcgr2b/Inpp5d/Stat3/Il21r/B2m/Cfh/H2-D1/Fcer1g/C1qb/Ctsh/Fcgr1/H2-Q6/Unc93b1/Trem2/Ctsc/Il4ra/Serpinb9/Icam1/Cd274/Prkcd/Ptprc/Gadd45g/Bcl6/Csf3r/C1qc/Rsad2/Tap2/C1qa/Tgfb1/Havcr2/Btk/Rftn1/Irf1/Sema4a/Brd2/Tyk2/Nckap1l/Otud5/C3ar1/Pnp/Mill2/Myd88/Tnfsf13b
GO:0046634	regulation of alpha-beta T cell activation	79	0.501205	1.89401	1.49e-05	0.000807821	0.000722825	1401	tags=30%, list=8%, signal=28%	Cd44/H2-K1/H2-Q4/Jak3/Runx1/Lgals9/Irgm1/H2-D1/Crtam/H2-Q6/Rara/Il4ra/Cd274/Ptprc/Bcl6/Btla/Tgfb1/Irf1/Card11/Brd2/Tyk2/Nckap1l/Klhl25/Pnp
GO:0048246	macrophage chemotaxis	29	0.588981	1.89113	0.0010339	0.0229551	0.0205399	1332	tags=38%, list=8%, signal=35%	Gpr35/Il34/Cmklr1/Csf1r/Cklf/Csf1/Myo9b/Ednrb/Rarres2/Thbs1/C3ar1
GO:0031348	negative regulation of defense response	174	0.460942	1.88992	2.95e-09	7.87e-07	7.04e-07	877	tags=19%, list=5%, signal=18%	A2m/Cd44/H2-K1/Ctla2a/Isg15/Socs3/Clec2d/Elf4/H2-Q4/Serping1/Fcgr2b/Nlrc5/Tap1/Il10ra/Stat2/Stat3/Tnfrsf1a/Lgals9/Irgm1/Igtp/H2-D1/H2-Q6/Trem2/Irgm2/Grn/Serpinb9/Parp14/Nmi/Drd2/Tap2/Aoah/Tgfb1/Havcr2
GO:0002526	acute inflammatory response	62	0.515596	1.887	9.92e-05	0.00382814	0.00342536	1134	tags=32%, list=7%, signal=30%	Serpina3n/H2-K1/C3/Ccr5/H2-Q4/Fcgr2b/Stat3/H2-D1/Fcer1g/Fcgr1/H2-Q6/Serpinb9/Icam1/Pik3cg/F3/Vwf/Ednrb/Fn1/Btk/Adam8
GO:0006959	humoral immune response	86	0.495544	1.84731	5.84e-06	0.000403641	0.000361172	699	tags=22%, list=4%, signal=21%	C4b/A2m/H2-K1/C3/H2-Q4/Serping1/Fcgr2b/B2m/Cfh/H2-D1/Cd59a/C1qb/H2-Q6/Trem2/Ptprc/C1qc/Cd37/Notch2/C1qa
GO:0046631	alpha-beta T cell activation	126	0.455808	1.84616	4.75e-06	0.000340513	0.000304685	1401	tags=27%, list=8%, signal=25%	Cd44/H2-K1/Elf4/H2-Q4/Jak3/Runx1/Stat3/Lgals9/Irgm1/Igtp/H2-D1/Crtam/Wdfy4/H2-Q6/Rara/Il4ra/Cd274/Ptprc/Gadd45g/Bcl6/Btla/Rsad2/Dock2/Tgfb1/Irf1/Sema4a/Tcf7/Card11/Brd2/Tyk2/Nckap1l/Otud5/Klhl25/Pnp
GO:0050792	regulation of viral process	122	0.464159	1.83789	1.63e-06	0.000142684	0.000127671	1348	tags=22%, list=8%, signal=20%	Ifitm3/Oasl2/Bst2/Cd74/Trim30d/Isg15/Trim30a/Apobec3/Ifih1/Stat1/Trim12a/Sp100/Eif2ak2/Trim25/Trim12c/Trim14/Shfl/Rsad2/Zc3hav1/Oas2/Dynlt1b/Trim8/Prox1/Pfn1/Tmprss4/Ifitm7/Ifitm2
GO:1903038	negative regulation of leukocyte cell-cell adhesion	96	0.485098	1.83644	9.7e-06	0.000577359	0.000516612	1134	tags=25%, list=7%, signal=23%	Cd44/H2-K1/Cd74/H2-Q4/Jak3/Runx1/Cd86/Lgals9/H2-D1/Sdc4/Crtam/H2-Q6/Il4ra/Casp3/Cd274/Bcl6/Laptm5/Btla/Cd37/Tgfb1/Havcr2/Irf1/Pag1/Adam8
GO:0002011	morphogenesis of an epithelial sheet	47	0.535299	1.8309	0.000259342	0.00815179	0.00729409	602	tags=17%, list=4%, signal=16%	Cd44/Pdpn/Flna/Sox11/Arhgap24/Ccn1/Notch2/Phactr4
GO:0035886	vascular associated smooth muscle cell differentiation	30	0.566472	1.82592	0.00167273	0.0336652	0.0301231	1422	tags=27%, list=9%, signal=24%	C3/Eng/Cfh/Cth/Prok2/Pdgfb/Nfatc2/Pdgfrb
GO:0042742	defense response to bacterium	132	0.47412	1.81919	1.2e-07	1.68e-05	1.51e-05	983	tags=32%, list=6%, signal=30%	H2-K1/Gbp3/Isg15/Gbp7/H2-Q4/Mpeg1/Naip5/Lyz2/Iigp1/Tnfrsf1a/Lgals9/Irgm1/B2m/Igtp/H2-D1/Fcer1g/Ssc5d/Cyba/Shc1/Stab1/Tnfaip8/Fcgr1/H2-Q6/Trem2/Irgm2/Ncf1/Grn/Serpinb9/Rbck1/Rnf213/Prkcd/Colec12/Anxa3/Gbp5/Notch2/Myo1f/Oas2/Prkd1/Havcr2/Irf8/Rarres2/Gbp6
GO:0002437	inflammatory response to antigenic stimulus	44	0.531907	1.8116	0.000328224	0.00971649	0.00869416	988	tags=34%, list=6%, signal=32%	H2-K1/C3/H2-Q4/Fcgr2b/H2-D1/Ak7/Fcer1g/Fcgr1/H2-Q6/Trem2/Serpinb9/Icam1/Notch2/Cd68/Btk
GO:0060760	positive regulation of response to cytokine stimulus	44	0.527408	1.79628	0.000363707	0.0103824	0.00928997	570	tags=27%, list=3%, signal=26%	Cd74/Ifih1/Rbm47/Irf7/Nlrc5/Irgm1/Igtp/Trem2/Irgm2/Laptm5/Parp14/Csf1
GO:0019079	viral genome replication	87	0.472188	1.74106	4.85e-05	0.00218712	0.001957	1348	tags=17%, list=8%, signal=16%	Ifitm3/Oasl2/Bst2/Isg15/Apobec3/Ifih1/Eif2ak2/Shfl/Rsad2/Zc3hav1/Oas2/Prox1/Pcbp2/Ifitm7/Ifitm2
GO:0002819	regulation of adaptive immune response	132	0.451568	1.73266	8.96e-07	8.79e-05	7.87e-05	1254	tags=23%, list=8%, signal=22%	Cd44/H2-K1/Parp3/C3/Cd74/H2-Q4/Jak3/Irf7/Fcgr2b/B2m/H2-D1/Fcer1g/Fcgr1/H2-Q6/Trem2/Il4ra/Cd274/Ptprc/Bcl6/Rsad2/Tap2/Samsn1/Tgfb1/Havcr2/Btk/Irf1/Brd2/Tyk2/Adcy7/Nckap1l/Otud5
GO:0010324	membrane invagination	55	0.480802	1.71625	0.000543581	0.0141458	0.0126574	1210	tags=25%, list=7%, signal=24%	C3/Bin2/Itgam/Fcgr2b/Fcer1g/Fcgr1/Plcg2/Trem2/Gulp1/Aif1/Megf10/Abca7/Nckap1l/Thbs1
GO:0045639	positive regulation of myeloid cell differentiation	80	0.442007	1.66452	0.000268015	0.00828478	0.00741309	994	tags=22%, list=6%, signal=21%	Cd74/Isg15/Stat1/Itgam/Runx1/Inpp5d/Stat3/Cd101/Trem2/Casp8/Il34/Csf1r/Csf1/Notch2/Ikzf1/Fes/Tgfb1/Zfp36l1
GO:0002532	production of molecular mediator involved in inflammatory response	63	0.449779	1.65525	0.00161016	0.0326646	0.0292278	1459	tags=25%, list=9%, signal=23%	Pld4/Stat3/Fcer1g/Trem2/Ncf1/Il4ra/Grn/Itgb6/Pbxip1/Gbp5/Btk/Tlr3/Alox5/Adcy7/Ephx2/Myd88
GO:0060759	regulation of response to cytokine stimulus	114	0.402864	1.5766	6.94e-05	0.00294143	0.00263195	997	tags=19%, list=6%, signal=18%	Cd74/Isg15/Ifih1/Naip5/Rbm47/Irf7/Nlrc5/Stat2/Tnfrsf1a/Irgm1/Igtp/Trem2/Irgm2/Ptprc/Angpt1/Laptm5/Parp14/Csf1/Traip/Irak2/Parp9/Mapk7
GO:0070534	protein K63-linked ubiquitination	57	0.435255	1.56663	0.00280782	0.0497144	0.0444836	971	tags=14%, list=6%, signal=13%	Trim30d/Trim30a/Trim12a/Parp10/Rnf213/Trim12c/Rnf135/Trim8
GO:0001818	negative regulation of cytokine production	191	0.370281	1.55979	3.27e-05	0.00164679	0.00147352	1255	tags=22%, list=8%, signal=21%	Bst2/Trim30a/Aqp4/Elf4/Jak3/Fcgr2b/Inpp5d/Xaf1/Tnfrsf1a/Lgals9/Irgm1/Igtp/Cd59a/Ssc5d/Trem2/Irgm2/Rara/Casp3/Cd274/Ptprc/Angpt1/Cmklr1/Bcl6/Laptm5/Klf2/Tgfb2/Nmi/Traip/Ezr/Srgn/Tgfb1/Mertk/Havcr2/Fn1/Btk/Pglyrp1/Tspo/Adcy7/Nckap1l/Thbs1/Otud5/Hdac7
GO:0007249	canonical NF-kappaB signal transduction	188	0.352084	1.5417	7.2e-05	0.00300123	0.00268545	1134	tags=20%, list=7%, signal=19%	Cd74/Trim30d/Trim30a/Stat1/Rassf2/Rhoh/Tnfrsf1a/Trim12a/Irgm1/Igtp/Ror1/Plcg2/Trem2/Irgm2/Casp8/Rbck1/Trim25/Trim12c/Angpt1/Esr1/Irak4/Zc3hav1/Capn3/Ednrb/Akap13/Tgfb1/Tmem106a/Prkd1/Ilk/Cth/Irak2/Trim8/S100a13/Irf1/Flot2/Tlr3/Card11/Adam8
GO:0043123	positive regulation of canonical NF-kappaB signal transduction	107	0.401812	1.53089	0.000250764	0.00806336	0.00721497	1094	tags=22%, list=7%, signal=21%	Cd74/Trim30d/Trim30a/Tnfrsf1a/Trim12a/Ror1/Casp8/Rbck1/Trim25/Trim12c/Irak4/Zc3hav1/Ednrb/Akap13/Tgfb1/Tmem106a/Prkd1/Ilk/Cth/Trim8/S100a13/Flot2/Tlr3/Card11
GO:0043122	regulation of canonical NF-kappaB signal transduction	165	0.374526	1.51644	3.67e-05	0.00178531	0.00159747	1094	tags=21%, list=7%, signal=19%	Cd74/Trim30d/Trim30a/Stat1/Rhoh/Tnfrsf1a/Trim12a/Irgm1/Igtp/Ror1/Plcg2/Trem2/Irgm2/Casp8/Rbck1/Trim25/Trim12c/Angpt1/Esr1/Irak4/Zc3hav1/Capn3/Ednrb/Akap13/Tgfb1/Tmem106a/Prkd1/Ilk/Cth/Trim8/S100a13/Flot2/Tlr3/Card11
GO:0071216	cellular response to biotic stimulus	148	0.373254	1.50945	0.000183922	0.00647196	0.005791	1030	tags=22%, list=6%, signal=21%	Vim/Trim30d/Gbp3/Ly86/Trim30a/Stat1/Fcgr2b/Cd86/Trim12a/Irgm1/B2m/Igtp/Cfh/Plcg2/Trem2/Irgm2/Rara/Cd274/Bmp6/Sbno2/Trim12c/Map2k3/Gbp5/Notch2/Irak4/Cd68/Havcr2/Spi1/Irak2/Irf8/Gbp6/Btk/Plscr4
GO:0007159	leukocyte cell-cell adhesion	258	0.333163	1.49786	8.35e-06	0.000513635	0.000459592	1210	tags=20%, list=7%, signal=19%	Cd44/H2-K1/Cd74/Igfbp2/H2-Q4/F11r/Jak3/Itgam/Runx1/Rhoh/Capn1/Cd86/Lgals9/Irgm1/B2m/Cfh/H2-D1/Sdc4/Cd59a/Crtam/Dock8/Vcam1/H2-Q6/Rara/Il4ra/Icam1/Casp3/Cd274/Ptprc/Bcl6/Tespa1/Laptm5/Btla/Cd37/Tgfb1/Chst2/Havcr2/Aif1/Zmiz1/Irf1/Flot2/Pag1/Card11/Alox5/Brd2/Adam8/Gcnt1/Has2/Tyk2/Nckap1l/Thbs1
GO:0051701	biological process involved in interaction with host	99	0.377783	1.43035	0.00215438	0.0404489	0.036193	1348	tags=18%, list=8%, signal=17%	Ifitm3/Cd74/Trim30d/Gbp3/Trim30a/Gbp7/Naip5/Trim12a/Icam1/Trim25/Trim12c/Dynlt1b/Trim8/Gbp6/Pglyrp1/Tmprss4/Ifitm7/Ifitm2
GO:0002262	myeloid cell homeostasis	167	0.328999	1.35837	0.00195078	0.0375072	0.0335609	1084	tags=16%, list=7%, signal=15%	Cd44/Isg15/Stat1/Cflar/Itgam/Slc1a5/Fcgr2b/Inpp5d/Stat3/B2m/Cfh/Fcer1g/Casp3/Bcl6/Csf1r/Klf2/Csf1/Ikzf1/Pik3cd/Hdac6/Adgrf4/Mertk/Spi1/Btk/Zfp36l1/Ldb1
GO:0030522	intracellular receptor signaling pathway	260	0.290631	1.30709	0.000267605	0.00828478	0.00741309	1059	tags=15%, list=6%, signal=14%	Ddx60/Trim30a/Rxra/Ifih1/Pik3ap1/Irf7/Stat3/Cd86/Irgm1/Igtp/Plcg2/Unc93b1/Eif2ak2/Trem2/Irgm2/Rara/Trim25/Colec12/Brca1/Gbp5/Klf2/Esr1/Aldh1a3/Rsad2/Rnf135/Zc3hav1/Lyplal1/Prkd1/Havcr2/Bmp2/Rxrg/Nlrp1b/Cyp2j6/Btk/Rftn1/Zmiz1/Irf1/Tlr3
GO:0045765	regulation of angiogenesis	216	0.293875	1.24781	0.00209648	0.0394943	0.0353388	1450	tags=22%, list=9%, signal=20%	C3/Stat1/Runx1/Eng/Sparc/Stat3/Tnfrsf1a/Fgf2/Cd59a/Tspan18/Sp100/Shc1/Ctsh/Stab1/Grn/Pik3cg/Hk2/Brca1/Foxj2/F3/Anxa3/Klf2/Tgfb2/Adamts9/Pik3cd/Btg1/Cela1/Prkd1/Ism1/Epha1/Fgf18/Mapk7/Pxn/Sema4a/Dcn/Tlr3/Rhoj/Alox5/Nr2e1/Adgra2/Amot/Thbs1/S100a1/C3ar1/Stard13/Erap1/Nfe2l2
GO:0009100	glycoprotein metabolic process	300	-0.450085	-1.37049	0.000537407	0.0140504	0.0125721	3347	tags=31%, list=20%, signal=25%	Alg6/Galnt6/B3gat1/B4galt7/Aga/Man2a2/St6gal2/Alg5/Fbxo44/Ganc/Alg11/Acer2/Galnt1/Ddost/Fbxo17/Uggt2/Aqp11/Xxylt1/Erp44/Tmtc1/Arsb/Ndst1/B3galt5/Hs3st2/B3galt4/Ndst3/Ids/Man1a2/Phlda1/Gnptab/Pomgnt2/Mogs/Itm2b/Chst12/St3gal5/B4gat1/Sulf2/Fut9/Man1c1/Itm2a/Gfpt1/Ramp1/Csgalnact1/Tm9sf2/Tusc3/Fam20b/Galnt12/Galnt16/Extl1/Ncstn/Mgat5b/Hgsnat/B3galnt1/Man2a1/Alg1/Fkrp/Rpn2/Soat1/C1galt1c1/Acan/Hs3st3…
GO:0050890	cognition	311	-0.451168	-1.37608	0.000932417	0.0215525	0.0192848	3294	tags=26%, list=20%, signal=22%	Kalrn/B3gat1/Dgki/Psen2/Gm2a/Ndufs4/Scn2a/Kmt2a/Grin2a/Vip/Ntrk2/Aph1b/Tanc1/Mapk8ip2/App/Eif2ak4/Nog/Prkcz/Gabra5/Dgcr2/Crh/Thra/Deaf1/Ntf3/Adrb1/Tnr/Cck/Brinp1/Nptn/Bace1/Mef2c/Adcy8/Oprl1/Abcc8/Chmp2b/Grin2b/Shc3/Tusc3/Npas4/Ncstn/Nrg1/Pde5a/B4galt2/Aph1c/Foxp2/Chd7/Peg13/Camk2n1/Synpo/Arc/Ccnd2/Slc24a2/Atp1a3/Slc6a1/Adora1/Cln8/Tbr1/Syt4/Arl6ip5/Pgrmc1/Syt11/Ppp1r1b/Chrna4/Map1a/Adcy1/Slc17a7…
GO:0048511	rhythmic process	250	-0.455783	-1.37727	0.00130955	0.0276489	0.0247398	3064	tags=24%, list=18%, signal=20%	Kmt2a/Grin2a/Ass1/Ntrk2/Ptgds/Ntrk3/Pla2g4a/Cbx3/Fbxw7/Impdh2/Lgr4/Pparg/Hs3st2/Parp1/Adrb1/Suv39h1/Ada/Id4/Hnrnpd/Npr2/Oprl1/Gfpt1/Grin2b/Trp53/Nppc/Adrm1/Enpp2/Dtl/Gpr176/Rack1/Mapk9/Nfkb2/Relb/Siah2/Bmpr1b/Suv39h2/Gdf9/Naglu/Atp1a3/Adora1/Ndufa9/Klf9/Hnrnpu/Fzd4/Kcna2/Tyro3/Tnfaip6/Adcy1/Egr1/Adamts1/Usp2/Hes7/Cckbr/Cort/Nfil3/Atf5/Npas2/Nlgn3/Rorb/Bdnf/Cdk5r1
GO:0009101	glycoprotein biosynthetic process	248	-0.470846	-1.42282	0.000374759	0.0105486	0.00943871	3470	tags=32%, list=21%, signal=26%	Oga/Uggt1/Alg6/Galnt6/B3gat1/B4galt7/St6gal2/Alg5/Alg11/Acer2/Galnt1/Ddost/Uggt2/Aqp11/Xxylt1/Tmtc1/Ndst1/B3galt5/Hs3st2/B3galt4/Ndst3/Phlda1/Pomgnt2/Mogs/Itm2b/Chst12/St3gal5/B4gat1/Fut9/Man1c1/Itm2a/Gfpt1/Ramp1/Csgalnact1/Tm9sf2/Tusc3/Fam20b/Galnt12/Galnt16/Extl1/Ncstn/Mgat5b/B3galnt1/Alg1/Fkrp/Rpn2/Soat1/C1galt1c1/Acan/Hs3st3a1/Npc1/Mlec/Alg3/Bcl2/St8sia4/Alg2/Hs3st4/St3gal1/Hs6st2/Hbegf/Itm2c…
GO:0050807	regulation of synapse organization	280	-0.481565	-1.46205	3.98e-05	0.00188748	0.00168889	4037	tags=34%, list=24%, signal=26%	Syndig1/Mfn1/Chd4/Mycbp2/Prnp/Asap1/Mdga1/Adgrl2/Itsn1/Caprin2/Lrrc24/Numb/Dhx36/Clstn2/Oxtr/Igsf9/Rapgef4/Ppfia2/Kalrn/Dnm1l/Taok2/Homer1/Psen2/Ptk2b/Cdkl5/Epha7/Egln1/Abi3bp/Myh10/Ntrk2/Tanc1/Ntrk3/Myo5b/Il1rapl1/Lzts1/App/Etv5/Cript/Efnb3/Flrt2/Vps35/Il1rap/Tsc2/Gpm6a/Flrt1/Lrrc4b/Nectin1/Slit2/Mef2c/Dact1/Rims4/Chmp2b/Grin2b/Zfp804a/Psd/Dab2ip/Slitrk3/Baiap2/Nrg1/Rhob/Il1rapl2/Slitrk5/Lrrtm2/…
GO:0006813	potassium ion transport	185	-0.49264	-1.46521	0.000721342	0.0177014	0.0158389	2047	tags=23%, list=12%, signal=21%	Kcnh7/Slc9a8/Kcnj11/Kcnk3/Abcc8/Kcnj12/Kcna6/Atp1b3/Kcnk4/Kcna4/Kcnj6/Dlg1/Actn2/Kcnh5/Kcnj9/Atp1b1/Kcnj2/Kcns1/Slc24a2/Atp1a3/Adora1/Slc9a3/Kcnc1/Kcna2/Lrrc55/Slc17a7/Slc24a4/Kcng2/Slc12a5/Ghitm/Atp1a1/Htr2a/Kcnb1/Rgs4/Kcnk1/Kcng1/Kcnv1/Alg10b/Adcyap1/Kcnh3/Kcnj4/Kcnf1/Amigo1
GO:0050803	regulation of synapse structure or activity	286	-0.48511	-1.47293	4.55e-05	0.00206968	0.00185191	4037	tags=34%, list=24%, signal=26%	Syndig1/Mfn1/Chd4/Mycbp2/Prnp/Asap1/Mdga1/Adgrl2/Itsn1/Sybu/Caprin2/Lrrc24/Numb/Dhx36/Clstn2/Oxtr/Igsf9/Rapgef4/Ppfia2/Kalrn/Dnm1l/Taok2/Homer1/Psen2/Ptk2b/Cdkl5/Epha7/Egln1/Abi3bp/Myh10/Ntrk2/Tanc1/Ntrk3/Myo5b/Il1rapl1/Lzts1/App/Etv5/Cript/Efnb3/Flrt2/Vps35/Il1rap/Tsc2/Gpm6a/Flrt1/Lrrc4b/Nectin1/Slit2/Mef2c/2610042L04Rik/Dact1/Rims4/Chmp2b/Grin2b/Zfp804a/Psd/Dab2ip/Slitrk3/Baiap2/Nrg1/Rhob/Il1ra…
GO:0098739	import across plasma membrane	149	-0.504336	-1.48723	0.000778769	0.0185349	0.0165847	1679	tags=27%, list=10%, signal=24%	Kcnj12/Slc19a1/Slc31a1/Slc16a2/Slc28a1/Atp1b3/Slc7a8/Kcnj6/Dlg1/Slc39a10/Slc36a1/Kcnj9/Arl6ip1/Atp1b1/Kcnj2/Slc24a2/Atp1a3/Slc6a9/Slc6a1/Slc39a6/Cln8/Slc7a1/Arl6ip5/Slc9a3/Slc7a5/Slc24a4/Slc1a4/Slc12a5/Slc38a1/Atp1a1/Slc30a1/Rgs4/Lrrc8a/Slc1a2/Slc8a2/Ntsr1/Slc5a6/Kcnj4/Acsl5/Slc7a3
GO:0071805	potassium ion transmembrane transport	157	-0.507438	-1.50098	0.000400577	0.0110952	0.0099278	2047	tags=24%, list=12%, signal=21%	Kcnh7/Slc9a8/Kcnj11/Kcnk3/Kcnj12/Kcna6/Atp1b3/Kcnk4/Kcna4/Kcnj6/Dlg1/Actn2/Kcnh5/Kcnj9/Atp1b1/Kcnj2/Kcns1/Slc24a2/Atp1a3/Slc9a3/Kcnc1/Kcna2/Lrrc55/Slc24a4/Kcng2/Slc12a5/Ghitm/Atp1a1/Kcnb1/Rgs4/Kcnk1/Kcng1/Kcnv1/Alg10b/Kcnh3/Kcnj4/Kcnf1/Amigo1
GO:0021549	cerebellum development	94	-0.531743	-1.51212	0.00182925	0.035911	0.0321326	1858	tags=19%, list=11%, signal=17%	Cdk5r2/Trp53/Trnp1/Sez6l2/B4galt2/Foxp2/Naglu/Hspa5/Faim2/Fzd4/Sema4c/Psap/Sptbn2/Atp2b2/Zfp365/Zbtb18/Neurod2/Cdk5r1
GO:0007416	synapse assembly	205	-0.524074	-1.57097	2.44e-05	0.0012784	0.00114389	3122	tags=31%, list=19%, signal=25%	Plxnb1/Sdk2/Epha7/Abi3bp/Ntrk2/Ntrk3/Zdhhc2/Il1rapl1/Gabrb2/Lzts1/App/Arhgef9/Cript/Efnb3/Gabra5/Flrt2/Vps35/Il1rap/Slc25a46/Gpm6a/Flrt1/Lrrc4b/Nectin1/Nptn/Gabra4/Lrrc4/Slit2/Mef2c/2610042L04Rik/Psd/Slitrk3/Npas4/Nrg1/Il1rapl2/Zdhhc12/Hapln4/Slitrk5/Lrrtm2/Efnb1/Cntn5/Ptprd/Eef2k/Plxnd1/Myo6/Ntng2/Adgrl1/C1ql3/Lrrn3/Sptbn2/Gabrg2/Clstn3/Lrrn1/Icam5/Ephb1/Slitrk4/Clstn1/Lgi2/Gabra1/Nlgn3/Slitrk2/…
GO:0019233	sensory perception of pain	74	-0.565028	-1.57797	0.00144503	0.0298338	0.0266948	2715	tags=31%, list=16%, signal=26%	Cacnb3/Ano1/Grm3/Cxcl12/Tmem120a/Phf24/Bace1/Oprl1/Grin2b/Scn1a/Retreg1/Penk/Kcnk4/Nrg1/Adora1/Disc1/Kcna2/Chrna4/Ephb1/Htr2a/Tmem100/Ntsr1/Tac1
GO:0010469	regulation of signaling receptor activity	87	-0.556378	-1.58039	0.00106087	0.0233685	0.0209097	3227	tags=31%, list=19%, signal=25%	Homer1/Psen2/Thap11/Mapk8ip2/Fbxw7/Dlgap2/App/Nog/Pparg/Crh/Bud31/Crhbp/Park7/Mef2c/Shisa8/Tafa1/Ppp2ca/Cacng3/Arc/Rasgrf1/Slc6a9/Slc24a4/Gsg1l/Aplp2/Ramp3/Nlgn3/Cdk5r1
GO:1901890	positive regulation of cell junction assembly	106	-0.552672	-1.5874	0.000298922	0.00894369	0.00800267	2939	tags=27%, list=18%, signal=23%	Ntrk2/Ntrk3/Il1rapl1/Smad3/Flrt2/Il1rap/Flrt1/Lrrc4b/Fmn1/Slit2/Slitrk3/Enpp2/Itgb1bp1/Thy1/Slitrk5/Lrrtm2/Ptprd/Eef2k/Adgrl1/Lrrn3/Clstn3/Lrrn1/Ephb1/Slitrk4/Clstn1/Nlgn3/Slitrk2/Bdnf/Amigo1
GO:0007411	axon guidance	193	-0.533454	-1.59185	5.43e-06	0.000384812	0.000344323	2965	tags=32%, list=18%, signal=26%	Cntn2/Myh10/Bsg/App/Ece1/Lgr4/Lmtk2/Nfasc/Nog/Gas1/Efnb3/Alcam/Sema7a/Rtn4rl1/Scn1b/Cxcl12/Ntf3/Mapk8ip3/Unc5b/Flrt2/Emb/Megf9/Plxna4/Nectin1/Nptn/B4gat1/Efna3/Ephb6/Slit2/Mef2c/Sema6b/Lama1/Cdk5r2/Boc/Slit3/Etv4/Nell2/Bmpr1b/Sema5a/Cyfip2/Efnb1/Cntn5/Lama3/Tbr1/Ntn4/Sema4c/Epha4/Lmo4/Pcdhac2/Lama2/Shh/Ephb1/Nr4a3/Mypn/Nrp2/Lamc2/Etv1/Rtn4r/Lhx2/Bdnf/Cdk5r1
GO:0051952	regulation of amine transport	89	-0.559733	-1.59192	0.000671181	0.0168397	0.0150679	2587	tags=38%, list=16%, signal=32%	Stxbp1/Htr1b/Grm2/Syt12/Rab3a/Crh/Chga/Syt5/Cxcl12/Cck/Grin2b/Syt13/Nr3c1/Syt2/Arl6ip1/Syt7/Htr1a/Slc6a1/Adora1/Syt4/Arl6ip5/Syt11/Kcna2/Chrna4/Gabbr1/Slc7a5/Slc38a1/Htr2a/Kcnb1/Pcp4/Rgs4/Nat8l/Ntsr1/Sv2a
GO:0048709	oligodendrocyte differentiation	102	-0.560096	-1.60238	0.00022248	0.00738002	0.00660352	2529	tags=29%, list=15%, signal=25%	Pparg/Tspan2/Med12/Dusp10/Trpc4/Id4/Sox9/Enpp2/Ncstn/Nrg1/Enpp1/B4galt6/Gpm6b/Hes5/Sox5/Mal/Fa2h/Myrf/Bmp4/Il33/Mag/Zfp365/Shh/Prdm8/Tppp/Lingo1/Plp1/Nlgn3/Aspa/Opalin
GO:0015837	amine transport	95	-0.567015	-1.6138	0.00033903	0.00998354	0.00893311	3218	tags=39%, list=19%, signal=32%	Stxbp1/Htr1b/Grm2/Syt12/Slc18a2/Rab3a/Crh/Chga/Syt5/Cxcl12/Cck/Grin2b/Syt13/Nr3c1/Slc7a8/Syt2/Arl6ip1/Syt7/Htr1a/Slc6a1/Adora1/Syt4/Arl6ip5/Syt11/Kcna2/Chrna4/Gabbr1/Slc7a5/Ddc/Slc38a1/Htr2a/Kcnb1/Pcp4/Rgs4/Nat8l/Ntsr1/Sv2a
GO:1902475	L-alpha-amino acid transmembrane transport	51	-0.60031	-1.61692	0.00160535	0.0326646	0.0292278	990	tags=25%, list=6%, signal=24%	Arl6ip1/Slc6a9/Cln8/Slc7a1/Arl6ip5/Slc17a7/Slc7a5/Slc1a4/Slc38a1/Rgs4/Slc1a2/Ntsr1/Slc7a3
GO:0002209	behavioral defense response	51	-0.605589	-1.63114	0.00116663	0.0252184	0.022565	2546	tags=33%, list=15%, signal=28%	Gabra5/Crh/Deaf1/Cck/Brinp1/Dpp4/Mef2c/Grin2b/Penk/Gng7/Bcl2/Htr1a/Cckbr/Npas2/Adcyap1/Bdnf/Neurod2
GO:0007218	neuropeptide signaling pathway	47	-0.617021	-1.64332	0.00205076	0.038895	0.0348026	2024	tags=36%, list=12%, signal=32%	Kiss1r/Oprl1/Sort1/Pomc/Penk/Sstr3/Oprd1/Nmb/Scg5/Tyro3/Crhr1/Cort/Gpr83/Ntsr1/Tac1/Adcyap1/Gpr37
GO:0051932	synaptic transmission, GABAergic	65	-0.603428	-1.65943	0.000276827	0.00851014	0.00761474	2546	tags=48%, list=15%, signal=41%	Gabrb3/Oxtr/Kras/Stxbp1/Htr1b/Gabrb2/Gabra5/Adra1a/Zdhhc3/Plcl1/Clcn3/Gabra4/Phf24/Gabbr2/Slitrk3/Npas4/Car7/Zdhhc12/Hapln4/Slc6a1/Adora1/Cntnap4/Gabbr1/Gabrg2/Clstn3/Cckbr/Slc38a1/Gabrd/Gabra1/Tac1/Bdnf
GO:0042596	fear response	56	-0.617862	-1.67893	0.000431959	0.0117321	0.0104977	2546	tags=36%, list=15%, signal=30%	Gabra5/Crh/Deaf1/Adrb1/Cck/Brinp1/Dpp4/Mef2c/Grin2b/Penk/Gng7/Bcl2/Htr1a/Atp1a3/Cckbr/Crhr1/Npas2/Adcyap1/Bdnf/Neurod2
GO:0050961	detection of temperature stimulus involved in sensory perception	19	-0.725359	-1.69447	0.00237578	0.0438696	0.0392538	2675	tags=47%, list=16%, signal=40%	Ano1/Cxcl12/Nrg1/Adora1/Disc1/Ephb1/Htr2a/Ntsr1/Tac1
GO:0070445	regulation of oligodendrocyte progenitor proliferation	11	-0.818199	-1.72151	0.00234542	0.0434523	0.0388805	307	tags=36%, list=2%, signal=36%	Nog/Shh/Emx1/Adcyap1
GO:0021978	telencephalon regionalization	10	-0.842768	-1.72577	0.00116739	0.0252184	0.022565	590	tags=40%, list=4%, signal=39%	Bmp4/Shh/Emx1/Lhx2
GO:0055090	acylglycerol homeostasis	23	-0.721689	-1.74159	0.00125389	0.0267767	0.0239594	1321	tags=35%, list=8%, signal=32%	Fitm2/Mia2/Dgat2/Sesn2/Apoa1/Adora1/Fundc2/Lpl
GO:0007214	gamma-aminobutyric acid signaling pathway	28	-0.70427	-1.74727	0.000567701	0.0146373	0.0130972	2804	tags=46%, list=17%, signal=39%	Gabrb2/Gabra5/Plcl1/Gabra4/Phf24/Gabbr2/Htr1a/Atp1a3/Gabbr1/Gabrg2/Gabrd/Gabra1/Bdnf
GO:0106030	neuron projection fasciculation	24	-0.723263	-1.75578	0.000907026	0.0210979	0.0188781	1103	tags=17%, list=7%, signal=16%	Sema5a/Epha4/Amigo1/Cdk5r1
GO:0098693	regulation of synaptic vesicle cycle	16	-0.782798	-1.76818	0.000764949	0.0184415	0.0165011	202	tags=31%, list=1%, signal=31%	Pld1/Ppp3r1/Lpar1/Arhgdia/Cdk5r1
GO:0050951	sensory perception of temperature stimulus	26	-0.716109	-1.76956	0.00130388	0.0276333	0.0247258	1432	tags=42%, list=9%, signal=39%	Ano1/Cxcl12/Kcnk4/Nrg1/Enpp1/Adora1/Disc1/Ephb1/Htr2a/Ntsr1/Tac1
GO:0062149	detection of stimulus involved in sensory perception of pain	29	-0.71322	-1.77243	0.00022643	0.00745221	0.00666812	2715	tags=52%, list=16%, signal=43%	Cacnb3/Ano1/Cxcl12/Tmem120a/Phf24/Bace1/Grin2b/Scn1a/Nrg1/Adora1/Disc1/Ephb1/Htr2a/Ntsr1/Tac1

## Sheet: Aged_Tumor_Inh_gseGO_BP_REVIGO
ID	Description	setSize	enrichmentScore	NES	pvalue	p.adjust	qvalue	rank	leading_edge	core_enrichment
GO:0035456	response to interferon-beta	35	0.791196	3.03843	6.33e-12	3.5e-08	3.25e-08	584	tags=37%, list=4%, signal=36%	Ifit1/Gbp7/Stat1/Ifit3/Ifitm3/Gbp3/Iigp1/Gbp6/Xaf1/Irgm2/Irgm1/Ndufa13/Igtp
GO:0001788	antibody-dependent cellular cytotoxicity	11	0.953759	2.81606	3.8e-10	1.05e-06	9.77e-07	707	tags=73%, list=4%, signal=70%	H2-K1/H2-Q4/H2-D1/Fcgr1/H2-T22/Fcgr2b/Fcgr3/H2-T23
GO:0001911	negative regulation of leukocyte mediated cytotoxicity	23	0.806936	2.89864	6.8e-10	1.26e-06	1.17e-06	1110	tags=48%, list=7%, signal=45%	H2-K1/H2-Q4/Tap1/Arrb2/H2-D1/Clec2d/H2-T22/Lgals9/H2-T23/Nckap1l/Ptprc
GO:0140888	interferon-mediated signaling pathway	58	0.577325	2.55367	2.35e-09	1.43e-06	1.33e-06	185	tags=19%, list=1%, signal=19%	Stat2/Stat1/Parp9/Nlrc5/Ifih1/Ifitm3/Oas2/Isg15/Parp14/Irgm2/Irgm1
GO:0002883	regulation of hypersensitivity	15	0.908667	2.88995	1.44e-09	1.43e-06	1.33e-06	707	tags=60%, list=4%, signal=57%	H2-K1/H2-Q4/H2-D1/Fcgr1/H2-T22/Fcgr2b/Btk/Fcgr3/H2-T23
GO:0048525	negative regulation of viral process	67	0.531344	2.36072	1.21e-08	3.04e-06	2.82e-06	632	tags=24%, list=4%, signal=23%	Oasl2/Stat1/Ifih1/Ifitm3/Oas2/Eif2ak2/Isg15/Trim30a/Zc3hav1/Sp100/Trim25/Trim30d/Trim14/Inpp5k/Trim12a/Rsad2
GO:0046641	positive regulation of alpha-beta T cell proliferation	23	0.751539	2.69964	3.94e-08	9.1e-06	8.45e-06	1110	tags=39%, list=7%, signal=37%	H2-K1/H2-Q4/Cd55/Irgm1/H2-D1/H2-T22/H2-T23/Syk/Ptprc
GO:0050830	defense response to Gram-positive bacterium	48	0.582151	2.3748	4.37e-08	9.67e-06	8.98e-06	1722	tags=35%, list=10%, signal=32%	Gbp7/H2-K1/Gbp3/H2-Q4/Gbp6/H2-D1/B2m/Ncf1/H2-T22/Fau/H2-T23/Npy/Scd1/Romo1/Tnfaip8/Hck/Ssc5d
GO:0048002	antigen processing and presentation of peptide antigen	37	0.64936	2.55857	6.19e-08	1.32e-05	1.22e-05	1068	tags=35%, list=6%, signal=33%	H2-K1/H2-Q4/Tap1/H2-D1/B2m/Tapbp/Fcgr1/H2-T22/Fcgr2b/Fcgr3/H2-T23/Ctss/Mill2
GO:0060337	type I interferon-mediated signaling pathway	45	0.610764	2.46847	1.22e-07	2.33e-05	2.16e-05	76	tags=16%, list=0%, signal=16%	Stat2/Stat1/Nlrc5/Ifih1/Ifitm3/Oas2/Isg15
GO:0034340	response to type I interferon	51	0.583428	2.43236	1.54e-07	2.85e-05	2.64e-05	158	tags=16%, list=1%, signal=16%	Stat2/Stat1/Nlrc5/Ifih1/Ifitm3/Oas2/Isg15/Sp100
GO:0032815	negative regulation of natural killer cell activation	14	0.854621	2.63769	2.23e-07	3.75e-05	3.48e-05	707	tags=43%, list=4%, signal=41%	H2-K1/H2-Q4/H2-D1/H2-T22/Lgals9/H2-T23
GO:0001787	natural killer cell proliferation	18	0.813019	2.738	3.32e-07	4.84e-05	4.49e-05	1270	tags=44%, list=8%, signal=41%	H2-K1/H2-Q4/H2-D1/Emp2/H2-T22/H2-T23/Flt3l/Gm36723
GO:0007416	synapse assembly	205	-0.51228	-1.55933	5.58e-07	7.18e-05	6.67e-05	4556	tags=45%, list=27%, signal=33%	Hapln4/Lrrtm3/Ptk2/Adgrl3/Slitrk4/Pclo/Ogt/Nrg2/Pcdh17/Chd4/Adgrl2/Nrg3/Adnp/Nlgn3/Il1rapl2/Colq/Sipa1l1/Icam5/Magi2/Gabrg3/Lrrtm1/Nrxn2/Nrxn1/Lrfn5/Cacna1a/Nptn/Ntrk2/Ntng2/Pten/Mycbp2/Vps35/Adgrl1/Sdcbp/Lhfpl4/Mapt/Il1rap/Large1/Rap2a/Ntrk3/Add2/Eef2k/Ephb1/Shank2/Gnpat/Cntnap2/Mdga2/Cbln2/Zdhhc2/Pcdhb16/Il1rapl1/Syndig1/Slit2/Ppp1r9a/Gabra2/C1ql3/Gabra4/App/Epha7/Gabra1/Mef2c/Lrrn1/Numb/Lrrn3/…
GO:0045824	negative regulation of innate immune response	65	0.493735	2.11708	6.26e-07	7.88e-05	7.32e-05	707	tags=25%, list=4%, signal=24%	Stat2/H2-K1/Nlrc5/H2-Q4/Tap1/Isg15/Parp14/Arrb2/Nmi/Grn/H2-D1/Clec2d/H2-T22/Nlrx1/Lgals9/H2-T23
GO:0031341	regulation of cell killing	59	0.513587	2.31423	1.87e-06	0.000195408	0.000181444	1110	tags=32%, list=7%, signal=30%	H2-K1/H2-Q4/Tap1/Ccr5/Arrb2/Cd55/H2-D1/Clec2d/B2m/H2-T22/Itgam/Lgals9/H2-T23/Nckap1l/Tyrobp/Syk/Pnp/Mill2/Ptprc
GO:0035740	CD8-positive, alpha-beta T cell proliferation	14	0.818274	2.52551	2.7e-06	0.000262045	0.000243318	707	tags=36%, list=4%, signal=34%	H2-K1/H2-Q4/H2-D1/H2-T22/H2-T23
GO:0002861	regulation of inflammatory response to antigenic stimulus	27	0.682121	2.50551	3.21e-06	0.000301609	0.000280055	1014	tags=41%, list=6%, signal=38%	H2-K1/H2-Q4/H2-D1/Fcgr1/H2-T22/Fcgr2b/Btk/Gpx1/Fcgr3/H2-T23/Npy
GO:0001562	response to protozoan	19	0.752811	2.55718	4.97e-06	0.000444163	0.000412421	584	tags=42%, list=4%, signal=41%	Gbp7/Gbp3/Iigp1/Gbp6/Irgm2/Ccdc88b/Il4ra/Igtp
GO:0002396	MHC protein complex assembly	11	0.854311	2.52243	5.34e-06	0.000462457	0.000429408	272	tags=45%, list=2%, signal=45%	H2-K1/H2-Q4/H2-D1/B2m/Tapbp
GO:0090075	relaxation of muscle	26	-0.73874	-1.8716	7.5e-06	0.000624179	0.000579572	1620	tags=42%, list=10%, signal=38%	Pln/Camk2d/Kcnma1/Akap6/Camk2g/Abcc8/Pde4d/Pde5a/Kcnj2/Gucy1a1/Pde4b
GO:0042832	defense response to protozoan	18	0.753074	2.53612	7.55e-06	0.000624179	0.000579572	584	tags=44%, list=4%, signal=43%	Gbp7/Gbp3/Iigp1/Gbp6/Irgm2/Ccdc88b/Il4ra/Igtp
GO:0035455	response to interferon-alpha	20	0.702097	2.40002	1.17e-05	0.00090586	0.000841123	57	tags=20%, list=0%, signal=20%	Ifit1/Ifitm3/Eif2ak2/Ifit2
GO:0007611	learning or memory	280	-0.452371	-1.38711	2.22e-05	0.00166174	0.00154298	4081	tags=38%, list=25%, signal=29%	Ntf3/Slc7a11/Adnp/Zzef1/Rcan2/Hrh2/Cacna1c/Comt/Hrh1/Vdac3/Ptchd1/Nlgn3/Rcan1/Btbd9/Uba6/Cpeb3/B4galt2/Tmod2/Deaf1/Grin2a/Ctnnd2/Tac1/Pias1/Acss2/Prkar2b/Nrxn2/Nrxn1/Pak6/Nfix/Shc3/Gm2a/Nptn/Tsc1/Crh/Ntrk2/Adcy8/Thra/Syt4/Pten/Snap25/Mapt/Bche/B3gat1/Dgki/Tbr1/Scn2a/Large1/Plcb1/Prkcz/Amph/Slc12a5/Shank2/Psen2/Cntnap2/Itga8/Csmd1/Sorcs3/Meis2/Foxo6/Atxn1/Ptgs2/Drd1/Slc8a2/Ptprz1/App/Map1a/Chst10/…
GO:0007215	glutamate receptor signaling pathway	45	-0.643695	-1.7508	2.78e-05	0.0020025	0.00185939	1810	tags=38%, list=11%, signal=34%	Frrs1l/Homer3/Homer1/Gria2/App/Camk2a/Atp1a3/Kalrn/Grin2b/Grm8/Shank3/Grin1/Grm2/Kcnb1/Grm3/Dagla/Plp1
GO:0002673	regulation of acute inflammatory response	41	0.522732	2.11679	2.94e-05	0.00208767	0.00193848	1067	tags=32%, list=6%, signal=30%	H2-K1/H2-Q4/Ccr5/H2-D1/Fcgr1/H2-T22/Fcgr2b/Btk/Fcgr3/H2-T23/Ednrb/Npy/Tnfsf11
GO:0002526	acute inflammatory response	62	0.451582	2.04694	3.02e-05	0.00211994	0.00196844	1111	tags=31%, list=7%, signal=29%	H2-K1/H2-Q4/Ccr5/Stat3/H2-D1/Serpina3n/Fn1/Fcgr1/H2-T22/Fcgr2b/Btk/Fcgr3/H2-T23/B4galt1/Lipa/Ednrb/Npy/Tnfsf11/F3
GO:0060760	positive regulation of response to cytokine stimulus	44	0.520174	2.07347	3.12e-05	0.00216164	0.00200716	1022	tags=23%, list=6%, signal=21%	Parp9/Nlrc5/Ifih1/Parp14/Irgm2/Irgm1/Igtp/Laptm5/Axl/Cd300lf
GO:0050807	regulation of synapse organization	280	-0.44908	-1.37702	3.79e-05	0.00259069	0.00240555	4508	tags=42%, list=27%, signal=31%	Lrrtm3/Lrrk2/Ptk2/Adgrl3/Slitrk4/Sparcl1/Ogt/Nrg2/Rock2/Chd4/Adgrl2/Camk2b/Myo5b/Slc7a11/Cyfip1/Rock1/Adnp/Nlgn3/Il1rapl2/Colq/Sipa1l1/Arhgap44/Icam5/Chmp2b/Magi2/Tiam1/Rheb/Lrrtm1/Ncan/Dhx36/Nrxn1/Lrfn5/Rims4/Egln1/Nefl/Ntrk2/Rbmx/Ntng2/Grid1/Pten/Mycbp2/Vps35/Gripap1/Adgrl1/Dgkb/Lhfpl4/Gpr158/Il1rap/Tanc2/Rap2a/Ntrk3/Lrfn2/Ppfia2/Eef2k/Snap91/Ephb1/Shank2/Nrcam/Psen2/Baiap2/Etv5/Asap1/Mdga2/Dab…
GO:0019882	antigen processing and presentation	71	0.420411	1.89837	3.99e-05	0.00266103	0.00247087	1068	tags=23%, list=6%, signal=21%	H2-K1/H2-Q4/Tap1/Psmb8/H2-D1/B2m/Tapbp/Fcgr1/H2-T22/Ighm/Fcgr2b/Fcgr3/H2-T23/Psme2/Ctss/Mill2
GO:0050803	regulation of synapse structure or activity	286	-0.447654	-1.37395	5.3e-05	0.00341009	0.00316638	4508	tags=41%, list=27%, signal=31%	Lrrtm3/Lrrk2/Ptk2/Adgrl3/Slitrk4/Sparcl1/Ogt/Nrg2/Rock2/Chd4/Adgrl2/Camk2b/Myo5b/Slc7a11/Cyfip1/Rock1/Adnp/Nlgn3/Il1rapl2/Colq/Sipa1l1/Arhgap44/Icam5/Chmp2b/Magi2/Tiam1/Rheb/Lrrtm1/Ncan/Dhx36/Nrxn1/Lrfn5/Rims4/Egln1/Nefl/Ntrk2/Rbmx/Ntng2/Grid1/Pten/Mycbp2/Vps35/Gripap1/Adgrl1/Dgkb/Lhfpl4/Gpr158/Il1rap/Tanc2/Rap2a/Ntrk3/Lrfn2/Ppfia2/Eef2k/Snap91/Ephb1/Shank2/Nrcam/Psen2/Baiap2/Etv5/Asap1/Mdga2/Dab…
GO:0030101	natural killer cell activation	62	0.439159	1.99063	5.91e-05	0.00372237	0.00345636	1332	tags=29%, list=8%, signal=27%	H2-K1/H2-Q4/Il11ra1/H2-D1/Emp2/Ikzf1/H2-T22/Lgals9/Ticam1/Prdx1/H2-T23/Tyrobp/Flt3l/Axl/Ptprc/Unc13d/Gm36723/Dcaf15
GO:0061564	axon development	471	-0.418544	-1.30043	6.49e-05	0.00399202	0.00370674	4165	tags=36%, list=25%, signal=28%	Ifrd1/Macf1/Kif5b/Ank3/Ntf3/Myo5b/Map6/Nfib/Cyfip1/Adnp/Diaph2/Nlgn3/Cntn6/Dhfr/Cers2/Epha3/Sipa1l1/Evl/D130043K22Rik/Megf9/Chn1/Rnd2/Trio/Raph1/Cxcl12/Sema5b/Adcy10/Etv1/Epha5/Aplp2/Tiam1/Mapk8ip3/Plxnb3/Mag/Enpp1/Crtac1/Epb41l3/Cacna1a/Nfix/Nptn/Cacna1f/Nefl/Nova2/Stxbp1/Ntrk2/Ntng2/Robo2/Aplp1/Fstl4/Pten/Top2b/Fgfr2/Trak2/Golga4/Nfasc/Mycbp2/Pitpna/Enah/Mapt/Prickle1/Rab21/Tbr1/Nin/Rtn4/Brsk2/…
GO:1901861	regulation of muscle tissue development	35	-0.646008	-1.69944	0.000108802	0.00609114	0.00565584	1872	tags=31%, list=11%, signal=28%	Prkaa1/Hdac9/Ppargc1a/Bcl2/Mtm1/Mef2c/Erbb3/Hdac7/Cdon/Shh/Usp2
GO:0061687	detoxification of inorganic compound	11	0.780062	2.30321	0.000108869	0.00609114	0.00565584	73	tags=27%, list=0%, signal=27%	Mt1/Mt3/Mt2
GO:0048643	positive regulation of skeletal muscle tissue development	12	-0.823231	-1.84911	0.000110367	0.00611324	0.00567636	1872	tags=58%, list=11%, signal=52%	Prkaa1/Bcl2/Mtm1/Mef2c/Cdon/Shh/Usp2
GO:1903557	positive regulation of tumor necrosis factor superfamily cytokine production	78	0.396469	1.86499	0.000116015	0.00636247	0.00590778	912	tags=24%, list=5%, signal=23%	H2-K1/Ifih1/H2-Q4/Oas2/Ccr5/Stat3/H2-D1/Tmem106a/H2-T22/Fcgr2b/Btk/Lgals9/Fcgr3/Ticam1/H2-T23/Sphk2/Tyrobp/Syk/Clu
GO:0048709	oligodendrocyte differentiation	102	-0.527385	-1.55292	0.00014455	0.00784962	0.00728865	3331	tags=31%, list=20%, signal=25%	Rheb/Mag/Enpp1/Nfix/Ntrk2/Dlx1/Pten/Mal/Cntnap2/Wasf3/Dicer1/Ptprz1/Dusp15/Sox8/Tenm4/Pparg/Lingo1/Tppp/Trpc4/Med12/Sox5/Enpp2/Tspan2/Ptn/Fa2h/Il33/Gpm6b/Nrg1/Aspa/Shh/Plp1/Opalin
GO:0016045	detection of bacterium	12	0.773227	2.36211	0.000168435	0.0089708	0.00832971	210	tags=33%, list=1%, signal=33%	H2-K1/H2-Q4/Naip5/H2-D1
GO:0032814	regulation of natural killer cell activation	36	0.549956	2.13737	0.000170538	0.0089963	0.00835338	908	tags=28%, list=5%, signal=26%	H2-K1/H2-Q4/H2-D1/H2-T22/Lgals9/Ticam1/H2-T23/Tyrobp/Flt3l/Axl
GO:0050890	cognition	311	-0.438195	-1.34857	0.000175713	0.00909605	0.008446	4081	tags=38%, list=25%, signal=29%	Ntf3/Slc7a11/Cyfip1/Adnp/Zzef1/Rcan2/Hrh2/Cacna1c/Comt/Hrh1/Vdac3/Ptchd1/Nlgn3/Rcan1/Btbd9/Uba6/Chmp2b/Cpeb3/B4galt2/Tusc3/Tmod2/Deaf1/Grin2a/Ctnnd2/Dgcr2/Tac1/Pias1/Acss2/Prkar2b/Mfsd2a/Nrxn2/Nrxn1/Pak6/Nfix/Shc3/Gm2a/Nptn/Tsc1/Crh/Ntrk2/Adcy8/Thra/Syt4/Pten/Snap25/Mapt/Bche/Gpr158/B3gat1/Dgki/Tbr1/Scn2a/Large1/Plcb1/Prkcz/Jakmip1/Amph/Slc12a5/Shank2/Psen2/Cntnap2/Itga8/Csmd1/Sorcs3/Meis2/Foxo6/…
GO:0071346	cellular response to type II interferon	68	0.412562	1.76111	0.000185055	0.00923442	0.00857449	331	tags=19%, list=2%, signal=19%	Gbp7/Stat1/Parp9/Nlrc5/Gbp3/Vim/Gbp6/Parp14/Irgm2/Dapk3/Irgm1/Gbp5/Gapdh
GO:0048713	regulation of oligodendrocyte differentiation	43	-0.617402	-1.67078	0.000270958	0.0123019	0.0114228	1552	tags=28%, list=9%, signal=25%	Dicer1/Ptprz1/Dusp15/Tenm4/Pparg/Lingo1/Enpp2/Ptn/Il33/Aspa/Shh/Opalin
GO:0003012	muscle system process	322	-0.430923	-1.3258	0.000275696	0.0124153	0.011528	2386	tags=24%, list=14%, signal=21%	Adk/Atp2b1/Klf15/Large1/Foxp1/Prkd1/Arhgap42/Sulf2/Akap9/Dlg1/Jsrp1/Akap1/Scn1a/Gtf2ird1/Psen2/Tpcn2/Nr3c1/Ryr3/Homer1/Ppp3ca/Tmod1/Ndufs4/Pln/Ptgs2/Trip10/Drd1/Camk2d/Kcnma1/Akap6/Smtn/Atp8a2/Tcap/Atp1a3/Mef2c/Sorbs2/Cacna1d/Npy1r/Tpm4/Itga2/Tpm3/Camk2g/Kcnip2/Pparg/Htr2b/Adra1a/Flt1/Fbxo32/Ctdp1/Cacna2d1/Smpd3/Dock5/Nr4a3/Abcc8/Smad1/Apbb2/Meis1/Pde4d/Prkca/Ddx39b/Tshz3/Srsf1/Adra1b/Parp1/Ppara…
GO:0140374	antiviral innate immune response	34	0.511537	1.98512	0.000330086	0.0146268	0.0135815	242	tags=18%, list=1%, signal=17%	Ifit3/Ifih1/Eif2ak2/Ifit2/Ifit3b/Trim25
GO:0002507	tolerance induction	21	0.596341	2.13129	0.000328959	0.0146268	0.0135815	707	tags=29%, list=4%, signal=27%	H2-K1/H2-Q4/H2-D1/Cd274/H2-T22/H2-T23
GO:0002437	inflammatory response to antigenic stimulus	44	0.465066	1.8538	0.00039256	0.0168557	0.0156511	1264	tags=34%, list=8%, signal=32%	H2-K1/H2-Q4/H2-D1/Fcgr1/H2-T22/Fcgr2b/Btk/Gpx1/Fcgr3/Notch1/H2-T23/Notch2/Npy/Ak7/Cd68
GO:0048588	developmental cell growth	253	-0.435432	-1.33063	0.000517479	0.0207406	0.0192584	2825	tags=31%, list=17%, signal=26%	Rarg/Emx1/Syt4/Fstl4/Pten/Golga4/Dcaf13/Rims2/Mapt/Prickle1/Rab21/Syt1/Nin/Rtn4/Foxp1/Ntrk3/Prkcz/Ttc3/Nrp1/Itsn2/Arhgap32/Dcx/Nr3c1/Cdkl3/Fubp1/Zeb2/Sh3gl2/Cd2ap/Dclk1/Slit2/Trip10/Bcan/Olfm1/Disc1/Camk2d/Tnfrsf12a/Akap6/App/Plxna4/Smurf1/Sema6a/Auts2/Epha7/Cdkl5/Plaa/Cobl/Slit3/Slit1/Sorbs2/Shtn1/Sema5a/Eif2ak4/Rgma/Ext1/Itgb1/Tmem108/Adra1a/Ctdp1/Clstn3/Ttl/Flrt1/Dip2b/Cyfip2/Meis1/Ddx39b/Adra…
GO:0010613	positive regulation of cardiac muscle hypertrophy	38	-0.615983	-1.63959	0.00052048	0.0207406	0.0192584	1823	tags=37%, list=11%, signal=33%	Nr3c1/Ppp3ca/Trip10/Camk2d/Akap6/Mef2c/Adra1a/Nr4a3/Prkca/Ddx39b/Parp1/Trpc3/Adrb1/Pde5a
GO:0060292	long-term synaptic depression	34	-0.626363	-1.63932	0.000648004	0.0252767	0.0234703	2996	tags=47%, list=18%, signal=39%	Bcl2l1/Stxbp1/Adcy8/Pten/Mapt/Dgki/Shank2/Arf1/Sorcs3/Ppp1r9a/Drd1/Abhd6/Shank3/Grm2/Slc24a2/Kcnb1
GO:1990089	response to nerve growth factor	38	-0.607755	-1.61769	0.000749677	0.0286377	0.0265911	5318	tags=68%, list=32%, signal=47%	Rapgef1/Ngf/Rapgef2/Wasf1/Bdnf/Kidins220/Shoc2/Usp8/Micall1/Ntf3/Rap1a/Magi2/Tac1/Ntrk2/Cdc5l/Ntrk3/Dlg1/Nfkb1/Sh3gl2/Dync1li2/Cd2ap/Gria2/Akt1/Tmem108/Acap2/Parp1
GO:1990090	cellular response to nerve growth factor stimulus	38	-0.607755	-1.61769	0.000749677	0.0286377	0.0265911	5318	tags=68%, list=32%, signal=47%	Rapgef1/Ngf/Rapgef2/Wasf1/Bdnf/Kidins220/Shoc2/Usp8/Micall1/Ntf3/Rap1a/Magi2/Tac1/Ntrk2/Cdc5l/Ntrk3/Dlg1/Nfkb1/Sh3gl2/Dync1li2/Cd2ap/Gria2/Akt1/Tmem108/Acap2/Parp1
GO:0006516	glycoprotein catabolic process	28	0.555685	2.07566	0.000778888	0.0295497	0.027438	1451	tags=36%, list=9%, signal=33%	Adamts12/Cst3/Gpc1/Naglu/Man1a/Edem1/Btk/Fbxo2/Cela1/Hpse
GO:0046068	cGMP metabolic process	12	-0.777403	-1.74617	0.000792491	0.0298613	0.0277272	2535	tags=58%, list=15%, signal=49%	Gucy2e/Gucy2g/Rora/Gucy1b1/Pde5a/Atp2b2/Gucy1a1
GO:0007272	ensheathment of neurons	152	-0.47349	-1.42221	0.000848041	0.0311079	0.0288848	4081	tags=36%, list=25%, signal=27%	Ntf3/Cyfip1/Pikfyve/Acer3/Raf1/Eif2ak3/Srebf2/Nab2/Mag/Enpp1/Ski/Epb41l3/Cldn11/Tsc1/Ntrk2/Zfp24/Rarg/Serinc5/Pten/Nfasc/Hexa/Mal2/Mal/Large1/Ntrk3/Adam22/Dlg1/Mbp/Arhgef10/Gnpat/Cntnap2/Wasf3/Dicer1/Ptprz1/Adgrg6/Xk/Atrn/Akt1/Erbb3/Tenm4/Tppp/Tg/Tspan2/Ptn/Fa2h/Gpm6b/Gjc3/Nrg1/Tmem163/Rarb/Ndrg1/Sh3tc2/Plp1/Ugt8a
GO:0033210	leptin-mediated signaling pathway	10	0.75591	2.17354	0.000847196	0.0311079	0.0288848	102	tags=20%, list=1%, signal=20%	Mt3/Stat3
GO:0030048	actin filament-based movement	100	-0.498692	-1.4662	0.000933352	0.0340121	0.0315814	4485	tags=43%, list=27%, signal=32%	Pard3/Pik3ca/Tpm1/Myo5b/Limch1/Ank2/Rock1/Cacna1c/Evl/Vil1/Adcy10/Ryr2/Ctnna3/Kcnn2/Frmd6/Atp2a2/Myrip/Kcnq1/Hcn4/Akap9/Dlg1/Scn1a/Fnbp1l/Myo19/Pln/Zeb2/Wipf1/Camk2d/Akap6/Cacna1d/Myh10/Actn4/Shtn1/Epdr1/Cacna2d1/Myo6/Ccdc88c/Myo1b/Pde4d/Adrb1/Kcnj2/Myo5c/Pde4b
GO:0090036	regulation of protein kinase C signaling	16	-0.73452	-1.74686	0.00094824	0.0342468	0.0317993	1158	tags=38%, list=7%, signal=35%	Sez6l2/Adra1a/Sez6l/Dgkd/Phlpp1/Vegfa
GO:0051043	regulation of membrane protein ectodomain proteolysis	20	-0.702071	-1.70903	0.001036	0.0367847	0.0341559	1483	tags=30%, list=9%, signal=27%	Ptpn3/App/Rgma/Tspan5/Snx9/Tspan15
GO:0050919	negative chemotaxis	40	-0.596642	-1.60119	0.00105868	0.0373504	0.0346812	1529	tags=30%, list=9%, signal=27%	Slit2/Plxna4/Sema6a/Slit3/Slit1/Itgav/Lgr4/Rtn4rl1/Sema7a/Nrp2/Nrg1/Rtn4r
GO:0042552	myelination	150	-0.47215	-1.41827	0.00113324	0.0394781	0.0366568	4081	tags=35%, list=25%, signal=27%	Ntf3/Cyfip1/Pikfyve/Acer3/Raf1/Eif2ak3/Srebf2/Nab2/Mag/Enpp1/Ski/Epb41l3/Tsc1/Ntrk2/Zfp24/Rarg/Serinc5/Pten/Nfasc/Hexa/Mal2/Mal/Large1/Ntrk3/Adam22/Dlg1/Mbp/Arhgef10/Gnpat/Cntnap2/Wasf3/Dicer1/Ptprz1/Adgrg6/Xk/Atrn/Akt1/Erbb3/Tenm4/Tppp/Tg/Tspan2/Ptn/Fa2h/Gpm6b/Gjc3/Nrg1/Tmem163/Rarb/Ndrg1/Sh3tc2/Plp1/Ugt8a
GO:0097501	stress response to metal ion	10	0.746002	2.14505	0.00115809	0.0400915	0.0372264	73	tags=30%, list=0%, signal=30%	Mt1/Mt3/Mt2
GO:0007264	small GTPase-mediated signal transduction	391	-0.409951	-1.26917	0.00116892	0.0402154	0.0373414	5676	tags=45%, list=34%, signal=30%	Arhgap35/Ralgapb/Tiam2/Sos1/Frmd7/Pik3cg/Gna13/Wasf2/Fbxo8/Ripor2/Cdh2/Arhgef11/Itga3/Rapgef1/Map4k4/Kras/Ngf/Ywhaq/Dnaja3/Dennd1a/Arhgef18/Nf1/Rap1gap2/Bnip2/Rapgef2/Wasf1/Sema4d/Spry4/Cyth1/Ralgps1/Dock7/Cgnl1/Cavin4/Dok2/Rhobtb2/Rapgef3/Chuk/Lrrk2/Ralb/Iqsec2/Usp50/Rap1gap/Syde1/Ralgapa1/Ogt/Rock2/Cul3/Kbtbd7/Shoc2/Usp8/Csnk1a1/Abra/Cyfip1/Rock1/Madd/Rap1a/Dock9/Sipa1l1/Arhgap44/Sh2b2/Kctd10/C…
GO:1902414	protein localization to cell junction	121	-0.47957	-1.42511	0.00118852	0.0406371	0.037733	5387	tags=55%, list=32%, signal=37%	Clstn1/Mapk8/Gsk3b/Nsg1/Arhgef18/Nlgn1/Lgi1/Stx3/Fermt2/Cgnl1/Lrrc7/Tjp1/Iqsec2/Pclo/Jam3/Ogt/Jak1/Kif5b/Cplx1/Lamtor2/Rap1a/Nlgn3/Arhgap44/Magi2/Grin2a/Mapk8ip3/Lrrtm1/Nrxn2/Nrxn1/Dlgap1/Tnik/Kif3a/Vps35/Mapk9/Gripap1/Tjp2/Snap25/Lhfpl4/Mapt/Gphn/Prkcz/Adam22/Dlg1/Snap47/Heg1/Baiap2/Homer1/Lsr/Zdhhc2/Klc1/Kif5c/C1ql3/Map1a/Camk2a/Rapgef4/Kalrn/Stx4a/Actn4/Nbea/Nectin3/Clstn3/Grin1/Zdhhc7/Erbb4/N…
GO:0070670	response to interleukin-4	23	0.523405	1.88015	0.00123257	0.0418847	0.0388914	1022	tags=35%, list=6%, signal=33%	Fasn/Parp14/Tuba1b/Stat6/Jak3/Il4ra/Pml/Cd300lf
GO:0046339	diacylglycerol metabolic process	21	-0.680698	-1.67545	0.00135195	0.044823	0.0416197	2678	tags=48%, list=16%, signal=40%	Daglb/Pnpla2/Dgkq/Dgkb/Dgki/Dgkz/Avil/Dgkh/Dgkd/Dagla
GO:0046321	positive regulation of fatty acid oxidation	18	-0.707243	-1.69723	0.00138706	0.0450188	0.0418015	1481	tags=28%, list=9%, signal=25%	Ppargc1a/Acsl5/Pparg/Nr4a3/Ppara

## Sheet: Young_Tumor_Astro_gseGO_BP_REVI
ID	Description	setSize	enrichmentScore	NES	pvalue	p.adjust	qvalue	rank	leading_edge	core_enrichment
GO:0051607	defense response to virus	195	0.764754	1.95674	8.46e-19	2.26e-15	1.95e-15	1072	tags=29%, list=8%, signal=27%	Ddx60/Oasl2/Trim30a/Ifit1/Irgm1/Trim30d/Irf7/Cxcl10/Ifit3/Bst2/Ifitm3/Rsad2/Isg15/Trim34a/Slfn8/Oas2/Slfn9/Gbp5/Parp9/Stat2/Ifih1/Irgm2/Zc3hav1/Ifit3b/Stat1/Gbp7/Trim25/Ifit2/Mlkl/Dhx58/Shfl/Ifitm7/Igtp/Map3k14/Apobec1/Dtx3l/Trim21/Mov10/Eif2ak2/Znfx1/Samhd1/Ifit1bl2/Mndal/Vamp8/Ptprc/Pml/Unc93b1/Agbl4/Trim5/Apobec3/Gpam/Trim12a/Rtp4/Hcfc2/Aim2/Trim26/Casp1
GO:0002831	regulation of response to biotic stimulus	335	0.676258	1.75021	8.19e-16	1.1e-12	9.43e-13	1441	tags=24%, list=10%, signal=22%	Ddx60/A2m/Trim30a/Nlrc5/Irgm1/Parp14/Trim30d/Irf7/Gbp3/Casp8/Rsad2/Isg15/Ifi35/Lgals9/Gbp5/Parp9/Stat2/Ifih1/H2-Q4/Irgm2/Zc3hav1/Clec2d/Stat1/Gbp7/Trim25/Serping1/Tap1/Dhx58/Esr1/Gbp2/H2-Q7/Cd274/Cd74/Igtp/Flot1/Foxp1/Rbm47/Cxcl5/Prkca/H2-D1/Dtx3l/Trim21/Eif2ak2/Znfx1/Samhd1/H2-T22/Cav1/Ahr/Mndal/Colec12/Pml/Tap2/Ly86/Hmgb2/Unc93b1/Dapk1/Trim5/Apobec3/Tlr4/H2-T23/Trim12a/Pik3ap1/Trem2/Hcfc2/Plcg2…
GO:0031347	regulation of defense response	472	0.638214	1.66279	1.64e-15	1.76e-12	1.51e-12	1441	tags=22%, list=10%, signal=21%	Ddx60/A2m/Trim30a/Sbno2/Nlrc5/Irgm1/Socs3/Parp14/Trim30d/Irf7/Gbp3/Il1r1/Cd44/Casp8/Casp12/Rsad2/Isg15/C3/Ifi35/Lgals9/Shank3/Gbp5/Parp9/Stat2/Ifih1/H2-Q4/Irgm2/Zc3hav1/Clec2d/Stat1/Gbp7/Trim25/Serping1/Tap1/Dhx58/Ctss/Ier3/Ephb2/Esr1/Gbp2/Stat3/H2-Q7/Cd274/Cd74/Igtp/Flot1/Foxp1/Rbm47/Cxcl5/Prkca/H2-D1/Dtx3l/Trim21/Clcf1/Eif2ak2/Znfx1/Samhd1/H2-T22/Cav1/Ahr/Ctsc/Mndal/Fancd2/Vamp8/Akna/Colec12/Pm…
GO:0050778	positive regulation of immune response	418	0.642905	1.67156	8.2e-15	7.32e-12	6.3e-12	2026	tags=28%, list=15%, signal=24%	Ddx60/A2m/Trim30a/Plscr2/Nlrc5/Irgm1/Trim30d/Irf7/Gbp3/C4b/Il1r1/Cd44/Rsad2/C3/Ifi35/Lgals9/Gbp5/Parp9/Ifih1/H2-Q4/Irgm2/Zc3hav1/Gbp7/Mill2/Trim25/Serping1/Dhx58/Ptprj/Esr1/Gbp2/H2-Q7/C1s1/Cd274/Cd74/B2m/Igtp/C1ra/Flot1/Foxp1/Rbm47/Pla2g4a/Nfatc2/H2-D1/Fosl2/Clcf1/Eif2ak2/Znfx1/H2-T22/Cav1/Mndal/Pde4d/Ptprc/Colec12/Tap2/Hmgb2/Unc93b1/Hc/Bcar1/Plcl2/Trim5/Tlr4/H2-T23/Blnk/Trim12a/Pik3ap1/Lat2/Trem…
GO:0002252	immune effector process	327	0.668436	1.73056	1e-14	7.64e-12	6.58e-12	1549	tags=28%, list=11%, signal=25%	Ddx60/A2m/Sbno2/Bcl3/Irf7/C4b/Il1r1/Bst2/Rsad2/Fas/C3/Icam1/Anxa3/Ifi35/Lgals9/H2-Q4/Clec2d/Il6ra/Dock10/Trpm4/Dysf/Mill2/Serping1/Tap1/Hmox1/Dhx58/Parp3/Tcirg1/Ephb2/Angpt1/Apbb1ip/Stat3/H2-Q7/C1s1/Cd74/B2m/C1ra/Irf8/Foxp1/Exo1/Cxcl5/H2-D1/Fosl2/Clcf1/H2-T22/Ahr/Ctsc/Vamp8/Ptprc/Cracr2a/Tap2/Unc93b1/Hc/Plcl2/Rab27a/Gab2/Gadd45g/Tlr4/H2-T23/Cebpb/Dock2/Lat2/Trem2/Rnf19b/Plcg2/Stxbp2/Fcer1g/Casp1/…
GO:0001817	regulation of cytokine production	454	0.627554	1.63286	1.05e-13	6.23e-11	5.36e-11	1479	tags=23%, list=11%, signal=21%	Trim30a/Sulf1/Bcl3/Irgm1/Irf7/Il1r1/Bst2/Casp8/Rsad2/Isg15/C3/Met/Oas2/Xaf1/Lgals9/Gbp5/Ifih1/H2-Q4/Irgm2/Zc3hav1/S1pr3/Runx1/Ssc5d/Stat1/Il6ra/Trpm4/Cyp1b1/Hmox1/Dhx58/Afap1l2/Ptprj/Ephb2/Ccn1/Angpt1/Stat3/H2-Q7/Cd274/Cd74/B2m/Igtp/Flot1/Irf8/Foxp1/Rbm47/Socs1/Hspb1/Cxcl5/Gpnmb/Brca1/H2-D1/Arrdc4/Eif2ak2/H2-T22/Mndal/Aif1/Pde4d/Ptprc/Pml/Ankrd42/Heg1/Hmgb2/Unc93b1/Hc/Sulf2/Fn1/S100a13/Tspo/Ccr5/…
GO:0001819	positive regulation of cytokine production	273	0.673372	1.73698	3.47e-13	1.86e-10	1.6e-10	1479	tags=28%, list=11%, signal=25%	Sulf1/Bcl3/Irf7/Il1r1/Casp8/Rsad2/Isg15/C3/Oas2/Lgals9/Gbp5/Ifih1/H2-Q4/Zc3hav1/Runx1/Stat1/Il6ra/Cyp1b1/Dhx58/Afap1l2/Ptprj/Ephb2/Ccn1/Stat3/H2-Q7/Cd274/Cd74/B2m/Flot1/Irf8/Foxp1/Rbm47/Hspb1/Brca1/H2-D1/Arrdc4/Eif2ak2/H2-T22/Mndal/Aif1/Pde4d/Ptprc/Ankrd42/Heg1/Hmgb2/Unc93b1/Hc/Sulf2/S100a13/Ccr5/Tlr4/H2-T23/Cebpb/Rock2/Mapk11/Trem2/Il1rap/Plcg2/Scrib/Fcer1g/Aim2/Tnfrsf1a/Casp1/Agpat1/Stat5a/Tyro…
GO:0002443	leukocyte mediated immunity	195	0.703294	1.79948	1.28e-11	4.57e-09	3.93e-09	1549	tags=33%, list=11%, signal=30%	Bcl3/Irf7/C4b/Il1r1/Bst2/Rsad2/Fas/C3/Icam1/Anxa3/Lgals9/H2-Q4/Clec2d/Trpm4/Mill2/Serping1/Tap1/Hmox1/Parp3/Tcirg1/H2-Q7/C1s1/Cd74/B2m/C1ra/Exo1/Cxcl5/H2-D1/Fosl2/Clcf1/H2-T22/Ahr/Ctsc/Vamp8/Ptprc/Tap2/Unc93b1/Hc/Rab27a/Gab2/Tlr4/H2-T23/Lat2/Trem2/Rnf19b/Plcg2/Stxbp2/Fcer1g/Stat5a/Tyrobp/Arrb2/Pomc/Itgam/C1qb/Irak4/Ctsh/Arid5a/Snap23/Kit/C1qa/H2-K1/Stat6/P2rx7/Nfkbiz/C1qc
GO:0002237	response to molecule of bacterial origin	173	0.706038	1.80086	4.39e-11	1.38e-08	1.19e-08	1774	tags=32%, list=13%, signal=29%	Trim30a/Sbno2/Plscr2/Irgm1/Trim30d/Gbp3/Cxcl10/Gbp6/Lgals9/Gbp5/Vim/Irgm2/Ssc5d/Stat1/Noct/Gbp2/Cd274/B2m/Igtp/Irf8/Foxp1/Cxcl5/Prkca/Fosl2/Eif2ak2/Ahr/Pde4d/Tap2/Cmpk2/Ly86/Hmgb2/Trim5/Tlr4/Cebpb/Trim12a/Plscr4/Nos1/Trem2/Zfp36/Plcg2/Casp1/Trib1/Abca1/Mapk14/Irak4/Tab2/Trim12c/Arid5a/P2rx7/Mgst1/Nfkbiz/Nfkbia/Smad6/Pde4b/Ly96/Casp7
GO:0006954	inflammatory response	427	0.599364	1.55798	2.89e-10	8.04e-08	6.92e-08	2519	tags=32%, list=18%, signal=27%	Trim30a/Sbno2/Irgm1/Socs3/Serpina3n/Cxcl10/Il1r1/Cd44/Casp12/C3/Icam1/Ifi35/Lgals9/Timp1/Gbp5/H2-Q4/Irgm2/S1pr3/Ccl12/Hmox1/Afap1l2/Ctss/Ier3/Tcirg1/Ephb2/Esr1/Gbp2/Stat3/H2-Q7/Trim14/Igtp/Foxp1/Ano6/Cxcl5/Prkca/H2-D1/Fosl2/Clcf1/Eif2ak2/H2-T22/Ahr/Ctsc/Ulk4/Mndal/Aif1/Fancd2/Stab1/Vamp8/Akna/Ankrd42/Mecom/Gpx1/Ly86/Pik3cd/Hmgb2/Hc/Acvr1/Ctla2a/Fn1/Ccr5/Tlr4/Uaca/H2-T23/Cebpb/Csf1/Ext1/Pstpip1/Ch…
GO:0035456	response to interferon-beta	40	0.875543	2.00867	8.41e-10	1.96e-07	1.68e-07	725	tags=50%, list=5%, signal=48%	Ifit1/Irgm1/Iigp1/Gbp3/F830016B08Rik/Ifit3/Gbp6/Bst2/Ifitm3/Xaf1/Irgm2/Stat1/Gbp7/Shfl/Gbp2/Ifitm7/Igtp/Mndal/Gm4841/Cdc34
GO:0001562	response to protozoan	17	0.95432	1.96134	1.29e-09	2.77e-07	2.39e-07	323	tags=65%, list=2%, signal=63%	Bcl3/Iigp1/Gbp3/Gbp6/Irgm2/Gbp7/Gbp8/Ier3/Gbp2/Igtp/Irf8
GO:0002832	negative regulation of response to biotic stimulus	80	0.777783	1.90769	3.47e-09	5.98e-07	5.15e-07	1420	tags=35%, list=10%, signal=32%	A2m/Nlrc5/Irgm1/Parp14/Isg15/Lgals9/Stat2/H2-Q4/Irgm2/Clec2d/Serping1/Tap1/Dhx58/H2-Q7/Igtp/H2-D1/Trim21/Samhd1/H2-T22/Ahr/Mndal/Tap2/H2-T23/Trib1/Adar/Arrb2/Trafd1/H2-K1
GO:0002250	adaptive immune response	210	0.657798	1.68571	6.7e-09	1.05e-06	9.08e-07	1549	tags=29%, list=11%, signal=26%	Bcl3/Irf7/C4b/Il1r1/Cd44/Rsad2/Fas/C3/Icam1/H2-Q4/Il6ra/Trpm4/Mill2/Serping1/Tap1/Parp3/Tcirg1/Ephb2/Stat3/H2-Q7/C1s1/Cd274/Cd74/B2m/C1ra/Exo1/Pla2g4a/H2-D1/Fosl2/Clcf1/H2-T22/Ahr/Ctsc/Ptprc/Cracr2a/Tap2/Pik3cd/Il18bp/Unc93b1/Hc/Rab27a/Gadd45g/H2-T23/Lat2/Trem2/Rnf19b/Fcer1g/Tec/Trat1/C1qb/Csk/Ctsh/Arid5a/Irf1/C1qa/H2-K1/Lef1/Stat6/P2rx7/Nfkbiz/C1qc
GO:0002460	adaptive immune response based on somatic recombination of immune receptors built from immunoglobulin superfamily domains	165	0.690689	1.75865	7.51e-09	1.15e-06	9.88e-07	1549	tags=32%, list=11%, signal=29%	Bcl3/Irf7/C4b/Il1r1/Rsad2/Fas/C3/Icam1/H2-Q4/Il6ra/Trpm4/Mill2/Serping1/Parp3/Tcirg1/Ephb2/Stat3/H2-Q7/C1s1/Cd274/Cd74/B2m/C1ra/Exo1/Pla2g4a/H2-D1/Fosl2/Clcf1/H2-T22/Ahr/Ctsc/Ptprc/Cracr2a/Tap2/Il18bp/Unc93b1/Hc/Rab27a/Gadd45g/H2-T23/Trem2/Fcer1g/C1qb/Ctsh/Arid5a/Irf1/C1qa/H2-K1/Lef1/Stat6/P2rx7/Nfkbiz/C1qc
GO:0001906	cell killing	78	0.769731	1.88744	1.25e-08	1.63e-06	1.41e-06	1479	tags=45%, list=11%, signal=40%	Gbp3/Cxcl10/C3/Lgals9/Gbp5/H2-Q4/Irgm2/Clec2d/Gbp7/Mill2/Tap1/Gbp2/H2-Q7/B2m/Igtp/Cxcl5/H2-D1/H2-T22/Ctsc/Ptprc/Tap2/Hc/Rab27a/Ccr5/H2-T23/Rnf19b/Stxbp2/Stat5a/Tyrobp/Arrb2/Pomc/Itgam/Ctsh/H2-K1/P2rx7
GO:0071216	cellular response to biotic stimulus	143	0.696937	1.76612	1.51e-08	1.93e-06	1.66e-06	1839	tags=32%, list=13%, signal=28%	Trim30a/Sbno2/Plscr2/Irgm1/Trim30d/Gbp3/Cxcl10/Gbp6/Gbp5/Vim/Irgm2/Stat1/Gbp2/Cd274/B2m/Igtp/Irf8/Cxcl5/Prkca/Ahr/Pde4d/Cmpk2/Ly86/Trim5/Tlr4/Cebpb/Trim12a/Plscr4/Atg10/Trem2/Zfp36/Plcg2/Casp1/Trib1/Abca1/Mapk14/Irak4/Trim12c/Arid5a/Nfkbiz/Tigar/Nfkbia/Pde4b/Ly96/Casp7/Rhoa
GO:0060759	regulation of response to cytokine stimulus	106	0.730583	1.82647	2.81e-08	3.42e-06	2.94e-06	1236	tags=27%, list=9%, signal=25%	Nlrc5/Irgm1/Parp14/Irf7/Il1r1/Isg15/Parp9/Stat2/Ifih1/Irgm2/Angpt1/Cd74/Igtp/Ccdc3/Rbm47/Tnfrsf11b/Samhd1/Cav1/Ptprc/Tlr4/Traip/Csf1/Ext1/Trem2/Tnfrsf1a/Casp1/Adar/Ptprf/Trim56
GO:1901988	negative regulation of cell cycle phase transition	212	0.645308	1.65483	3.02e-08	3.59e-06	3.09e-06	2274	tags=36%, list=16%, signal=31%	Parp9/Ier3/Birc5/Timeless/Bub1b/Clspn/Dtl/Knl1/Gpnmb/Brca1/Spc25/Dtx3l/E2f7/Gen1/Bard1/Ccnd1/Cdca8/Zwilch/Fancd2/Blm/Pml/Kntc1/E2f1/Ttk/Pkmyt1/Map3k20/Stil/Rbl1/Acvr1/Ndc80/Cenpe/Cdkn1a/Wee1/Mad2l1/Incenp/D7Ertd443e/Cdk5rap2/Rbbp8/Ppp2r3d/Nek11/Chek2/Chek1/Dna2/Mapk14/Rad51/Nuf2/Ezh2/Brca2/Apbb2/Myo16/Mtbp/Spc24/Ints7/Diaph3/Wdr76/Ccng1/Nop53/Bcl2/Stk33/Rhno1/Cdk2ap2/Muc1/Fam107a/Topbp1/Ccnb1/Ana…
GO:0008285	negative regulation of cell population proliferation	486	0.563604	1.4682	6.97e-08	7.62e-06	6.56e-06	2538	tags=30%, list=18%, signal=26%	Sulf1/Nox4/Irgm1/Ifit3/Cd44/Ifitm3/Fas/Parp10/Ifi35/Lgals9/H2-Q4/Runx1/Ifit3b/Stat1/Ccl12/Cyp1b1/Hmox1/Ptprj/Esr1/Skap2/Stat3/H2-Q7/Igfbp3/Cd274/Itga1/B2m/Brip1/Sparc/Socs1/Gpnmb/Prkca/H2-D1/Pth1r/Tns2/E2f7/Sh3bp4/Cd109/Ptpn14/Eif2ak2/Zbtb16/Adarb1/Med25/H2-T22/Cav1/Ahr/Hspg2/Aif1/Cdh13/Pml/Cdk6/E2f1/Agbl4/Prkg1/Tspo/Ccr5/Tgfbr2/H2-T23/Pdpn/Cebpb/Ift88/Cdkn1a/Nos1/Mapk11/Trem2/Tfdp1/Pawr/Scrib/49…
GO:0001959	regulation of cytokine-mediated signaling pathway	100	0.725283	1.79795	1.73e-07	1.72e-05	1.48e-05	1236	tags=27%, list=9%, signal=25%	Nlrc5/Irgm1/Parp14/Irf7/Il1r1/Isg15/Parp9/Stat2/Irgm2/Angpt1/Cd74/Igtp/Ccdc3/Rbm47/Tnfrsf11b/Samhd1/Cav1/Ptprc/Traip/Csf1/Ext1/Trem2/Tnfrsf1a/Casp1/Adar/Ptprf/Trim56
GO:0030335	positive regulation of cell migration	413	0.569505	1.48037	2.65e-07	2.29e-05	1.97e-05	2165	tags=30%, list=15%, signal=26%	Nox4/Cxcl10/Il1r1/Slc8a1/Casp8/Met/Icam1/Anxa3/Lgals9/Rapgef4/Dysf/Ccl12/Cyp1b1/Hmox1/Ptprj/Ephb2/Ccn1/S100a11/Angpt1/Stat3/Cd274/Cemip/Cd74/Flna/Sema3c/Foxp1/Sparc/Hspb1/Gcnt2/Ano6/Irs2/Gpnmb/Prkca/Kif20b/Tiam1/Lpar1/Cav1/Aif1/Sema5a/Pde4d/Ptprc/Cdh13/Rhoj/Glipr2/Wdr62/Pik3cd/Zfp703/Fgf18/Smoc2/Acvr1/Plvap/Bcar1/Ssh2/Sema6d/Fn1/Gab2/Tlr4/Tgfbr2/Iqgap1/Pdpn/Tjp1/Onecut2/Rock2/Csf1/Ddr2/Irs1/Dock5…
GO:0046649	lymphocyte activation	480	0.553097	1.44144	8.39e-07	5.81e-05	5.01e-05	2309	tags=27%, list=17%, signal=23%	Bcl3/Irgm1/Cd44/Rsad2/Fas/Icam1/Lgals9/H2-Q4/Jag2/Runx1/Il6ra/Dock10/Parp3/Tcirg1/Ptprj/Ephb2/Skap2/Apbb1ip/Stat3/H2-Q7/Cd274/Cd74/B2m/Igtp/Irf8/Foxp1/Exo1/Nfatc2/Socs1/Hspb1/Irs2/Gpnmb/Ildr2/Igfbp2/H2-D1/Fosl2/Clcf1/Msn/Itpkb/Zbtb16/H2-T22/Cav1/Ahr/Aif1/Fancd2/Blm/Ptprc/Cracr2a/Cdk6/Pik3cd/Ctla2a/Plcl2/Rab27a/Gadd45g/Hells/Tlr4/Tgfbr2/H2-T23/Blnk/Cebpb/Gpam/Cdkn1a/Sh3kbp1/Tcf7/Dock2/Lat2/Pawr/Pl…
GO:0019058	viral life cycle	185	0.638841	1.63289	8.3e-07	5.81e-05	5.01e-05	1322	tags=20%, list=9%, signal=18%	Oasl2/Trim30a/Trim30d/Bst2/Ifitm3/Rsad2/Isg15/Trim34a/Oas2/Icam1/Ifih1/Zc3hav1/Trim25/Shfl/Top2a/Ifitm7/Cd74/Kpna2/Trim21/Eif2ak2/Znfx1/Adarb1/Cav1/Mndal/Vamp8/Trim5/Apobec3/Trim12a/Hmga2/Trim26/Adar/Fam111a/Ly6e/Trim56/Hs3st5/Trim68/Trim12c
GO:0032640	tumor necrosis factor production	117	0.688133	1.72681	1.06e-06	7.08e-05	6.1e-05	1420	tags=30%, list=10%, signal=27%	Trim30a/Bcl3/Oas2/Lgals9/Ifih1/H2-Q4/Ptprj/Ephb2/Ccn1/Angpt1/Stat3/H2-Q7/Foxp1/Frmd8/Hspb1/Gpnmb/H2-D1/H2-T22/Ptprc/Tspo/Ccr5/Tlr4/H2-T23/Trem2/Zfp36/Plcg2/Fcer1g/Tnfrsf1a/Tyrobp/Arrb2/Tmem106a/Pomc/Mapk14/Arid5a/H2-K1
GO:0044770	cell cycle phase transition	440	0.556386	1.44767	1.1e-06	7.2e-05	6.2e-05	2274	tags=30%, list=16%, signal=26%	Parp9/Cdc7/Ier3/Birc5/Timeless/Nek6/Rrm2/Cenpf/Bub1b/Rad51b/Clspn/Dtl/Knl1/Gpnmb/Brca1/Spc25/Dtx3l/Stox1/E2f7/Gen1/Bard1/Tcf19/Ccnd1/Cdca8/Fbxl7/Ccnf/Zwilch/Aif1/Fancd2/Blm/Ptprc/Pml/Pole/Kntc1/Tacc3/Cdk6/Tmod3/E2f1/Ttk/Pkmyt1/Ube2e2/Map3k20/Stil/Cks2/Rbl1/Acvr1/Ndc80/Cenpe/Pdpn/Iqgap3/Nes/Cdkn1a/Ddr2/Wee1/Mad2l1/Incenp/D7Ertd443e/Adamts1/Kif14/Cdk5rap2/Plcg2/Rbbp8/Cit/Lmnb1/Atp2b4/Ppp2r3d/Nek11/…
GO:0044772	mitotic cell cycle phase transition	360	0.570818	1.47847	1.84e-06	0.000113291	9.75e-05	2309	tags=31%, list=17%, signal=26%	Cdc7/Ier3/Birc5/Nek6/Rrm2/Cenpf/Bub1b/Rad51b/Clspn/Dtl/Knl1/Gpnmb/Brca1/Spc25/Stox1/E2f7/Gen1/Bard1/Tcf19/Ccnd1/Cdca8/Fbxl7/Ccnf/Zwilch/Aif1/Blm/Pml/Pole/Kntc1/Tacc3/Cdk6/Tmod3/E2f1/Ttk/Pkmyt1/Ube2e2/Stil/Cks2/Rbl1/Acvr1/Ndc80/Cenpe/Pdpn/Iqgap3/Nes/Cdkn1a/Ddr2/Wee1/Mad2l1/Incenp/D7Ertd443e/Adamts1/Kif14/Cdk5rap2/Rbbp8/Cit/Lmnb1/Ppp2r3d/Nek11/Chek2/Chek1/Ccna2/Cdk2/Psme2/Rad51c/Mnat1/Nuf2/Ezh2/Myo…
GO:0016032	viral process	255	0.593482	1.53178	2.33e-06	0.000141595	0.00012189	1460	tags=18%, list=10%, signal=16%	Oasl2/Trim30a/Trim30d/Bst2/Ifitm3/Rsad2/Isg15/Trim34a/Oas2/Icam1/Ifih1/Zc3hav1/Stat1/Trim25/Shfl/Top2a/Ifitm7/Trim14/Cd74/Kpna2/Mdfic/Trim21/Eif2ak2/Znfx1/Adarb1/Sp100/Cav1/Mndal/Vamp8/Trim5/Apobec3/Trim12a/Hmga2/Zfp36/Trim26/Pfn1/Adar/Fam111a/Ptbp1/Ly6e/Trim56/Hs3st5/Trim68/Trim12c/Lgals1/Lef1
GO:0007249	canonical NF-kappaB signal transduction	182	0.631315	1.61318	2.55e-06	0.000153367	0.000132024	1963	tags=30%, list=14%, signal=26%	Trim30a/Bcl3/Irgm1/Trim30d/Casp8/Traf1/Trim34a/Irgm2/Zc3hav1/Stat1/Trim25/Esr1/Angpt1/Cd74/Igtp/Flot1/Eda2r/Hspb1/Ror1/Map3k14/Trim21/Cav1/Trim5/S100a13/Tlr4/Uaca/Tle1/Rock2/Akap13/S100a4/Trim12a/Trem2/Plcg2/Tnfrsf1a/Casp1/Arrb2/Tmem106a/Irak4/Lurap1l/Tab2/Trim68/Trim12c/Irf1/Btrc/Traf3/Fbxw11/Nfkbia/Nod1/Tgfbr3/Rnf31/Rhoa/Myo18a/Flot2/Tirap
GO:0002440	production of molecular mediator of immune response	154	0.642495	1.63695	4.58e-06	0.000252558	0.00021741	2286	tags=31%, list=16%, signal=26%	Il1r1/Bst2/Rsad2/Fas/H2-Q4/Trpm4/Hmox1/Parp3/Tcirg1/Ephb2/Angpt1/H2-Q7/Cd74/B2m/Foxp1/Exo1/H2-D1/Fosl2/Clcf1/Samhd1/H2-T22/Ptprc/Tlr4/H2-T23/Polq/Plcg2/Fcer1g/Casp1/Fbn1/Polm/Arid5a/Kit/Ezh2/H2-K1/Stat6/P2rx7/Nfkbiz/Icosl/Nod1/Crlf2/Ighm/Tirap/Nsd2/Ptpn22/Rasgrp1/Laptm5/Tgfb3/Hfe
GO:0043122	regulation of canonical NF-kappaB signal transduction	161	0.644064	1.63915	5.07e-06	0.000274178	0.000236021	1963	tags=30%, list=14%, signal=26%	Trim30a/Irgm1/Trim30d/Casp8/Traf1/Trim34a/Irgm2/Zc3hav1/Stat1/Trim25/Esr1/Angpt1/Cd74/Igtp/Flot1/Eda2r/Hspb1/Ror1/Trim21/Cav1/Trim5/S100a13/Tlr4/Uaca/Tle1/Akap13/S100a4/Trim12a/Trem2/Plcg2/Tnfrsf1a/Casp1/Arrb2/Tmem106a/Irak4/Lurap1l/Tab2/Trim68/Trim12c/Btrc/Traf3/Fbxw11/Nfkbia/Nod1/Tgfbr3/Rnf31/Rhoa/Flot2/Tirap
GO:0006959	humoral immune response	67	0.744523	1.81055	5.43e-06	0.000290375	0.000249964	1959	tags=45%, list=14%, signal=39%	A2m/Bcl3/Cxcl10/C4b/C3/H2-Q4/Serping1/H2-Q7/C1s1/B2m/C1ra/Exo1/Cxcl5/H2-D1/H2-T22/Ptprc/Hc/H2-T23/Trem2/Pomc/C1qb/Trf/C1qa/H2-K1/C1qc/Lgals3/H2-DMa/Rarres2/Ighm/Rbpj
GO:0052547	regulation of peptidase activity	198	0.604334	1.5477	6.45e-06	0.000325723	0.000280393	1412	tags=20%, list=10%, signal=18%	A2m/Serpina3n/Cd44/Casp8/Fas/Timp1/Psmb8/Stat1/Serping1/Ctss/Ccn1/Stat3/Birc5/Bbc3/Psmb9/Cast/Mgmt/Cd109/Spink10/Cav1/Mndal/Pml/Gpx1/Mrtfa/Dapk1/Uaca/Crb2/Rock2/Antxr1/Nek5/Ttbk1/Aim2/Casp1/St18/Pih1d1/Psme2/Ctsh/Itih5/Prelid1/Ppm1f
GO:0070661	leukocyte proliferation	199	0.608793	1.55893	6.95e-06	0.000344231	0.000296325	2964	tags=46%, list=21%, signal=37%	Irgm1/Cd44/Lgals9/H2-Q4/Ccl12/Junb/Tcirg1/Ephb2/H2-Q7/Cd274/Cd74/Nfatc2/Irs2/Gpnmb/Igfbp2/H2-D1/Fosl2/Clcf1/Msn/H2-T22/Ahr/Aif1/Blm/Ptprc/Plcl2/Hells/Tlr4/Tgfbr2/H2-T23/Cebpb/Gpam/Csf1/Cdkn1a/Dock2/Trem2/Pawr/Scrib/Nck2/Stat5a/Flt3l/Tyrobp/Itgam/Csf2ra/Irf1/Kit/H2-K1/Lef1/Stat6/P2rx7/Psmb10/Nfkbiz/Erbb2/Lgals3/Pde5a/Adk/Icosl/Zfp335/Cd38/Slc7a1/Bcl2/Coro1a/Ighm/Elf4/Tirap/Prkcq/Prkcd/Ptpn22/Znhit…
GO:0007059	chromosome segregation	341	0.561703	1.4545	7.58e-06	0.000372107	0.000320322	2792	tags=33%, list=20%, signal=27%	Psrc1/Cenph/Top2a/Uhrf1/Kif11/Birc5/Flna/Nek6/Cenpf/Bub1b/Brip1/Ect2/Aaas/Dlgap5/Knl1/Brca1/Esco2/Kif18a/Racgap1/Spc25/Kif23/Cenpk/Kifc1/Tpx2/Gen1/Rmi2/Sgo2a/Cdca8/Zwilch/Cenpp/Fancd2/Cenpn/Mki67/Cenpm/Kntc1/Cenpi/Tacc3/Ttk/Mybl2/Stil/Ndc80/Cenpe/Setdb2/Rad18/Ncapg2/Kif4/Knstrn/Mad2l1/Incenp/Kif14/Cdk5rap2/Aspm/Cit/Ncapd2/Stag3/Ccsap/Cenpu/Chek2/Rec8/Syde1/Nuf2/Cpeb1/Brca2/Ccne1/Ccnb2/Terb1/Cenpw…
GO:0007015	actin filament organization	362	0.554461	1.43597	1.09e-05	0.00051246	0.000441142	2719	tags=33%, list=19%, signal=27%	Nox4/Iqgap2/Fmn1/Myo1d/Asap3/Rhobtb1/Met/Icam1/Shank3/Sorbs1/Avil/Add3/Tmeff2/Tagln2/Flna/Capn1/Lpar1/Actn1/Plekhh2/Rhpn1/Aif1/Sema5a/Rhoj/Dpysl3/Tmod3/Rac3/Gas2l3/Cttn/Shroom3/Arhgap25/Bcar1/Ssh2/Ccn2/Iqgap1/Tjp1/Rhot2/Iqgap3/Rock2/Pstpip1/Sh3kbp1/Plekhg2/Myo1e/Samd14/Pawr/Myo1c/Cit/Cnn3/Rhob/Nck2/Arpc1b/Synpo/Pdlim4/Pfn1/Baiap2/S100a10/Cdc42ep4/Pak3/Pakap/Gdpd2/Spag6l/Tpm3/Gas2l1/Micall2/Trf/Nf…
GO:0051301	cell division	497	0.526788	1.37266	1.3e-05	0.000594136	0.000511452	2807	tags=31%, list=20%, signal=26%	Iqgap2/Samd9l/Ckap2/Cdc7/Psrc1/Top2a/Kif11/Birc5/Timeless/Nek6/Bub1b/Brip1/Ect2/Knl1/Kif20b/Racgap1/Spc25/Kif23/Tpx2/Stox1/E2f7/Sgo2a/Ccnd1/Zbtb16/Cdca8/Fbxl7/Ccnf/Zwilch/Ulk4/Blm/Akna/Vrk1/Kntc1/Tacc3/Cdk6/Mis18bp1/Anxa11/Cks2/Entr1/Ndc80/Cenpe/Setdb2/Hells/Iqgap1/Ncapg2/Iqgap3/Rock2/Ext1/Pstpip1/Knstrn/Wee1/Mad2l1/Incenp/Bin3/Cenpa/Hmga2/Exoc4/Kif14/Aspm/Fign/Rbbp8/Cit/Nek3/Pkp4/Ncapd2/Ccsap/Rh…
GO:0033993	response to lipid	469	0.532621	1.38677	1.34e-05	0.000608002	0.000523388	1774	tags=20%, list=13%, signal=18%	Trim30a/Sbno2/Plscr2/Irgm1/Trim30d/Gbp3/Cxcl10/Gbp6/Fas/Lgals9/Gbp5/Vim/Irgm2/Runx1/Stat1/Noct/Hmox1/Pappa/Spp1/Esr1/Gbp2/Stat3/Rbp1/Cd274/B2m/Igtp/Irf8/Foxp1/Cxcl5/Brca1/Prkca/Fosl2/Lpar1/Msn/Eif2ak2/Sp100/Cav1/Ahr/Pde4d/Cmpk2/Ly86/Zfp703/Hmgb2/Sgk1/Trim5/Ccr5/Gramd1c/Tlr4/Tgfbr2/Rbfox2/Cebpb/Rock2/Akap13/Irs1/Trim12a/Brinp2/Plscr4/Nos1/Hmga2/Trem2/Zfp36/Plcg2/Casp1/Cyp7b1/Trib1/Adam15/Abca1/Map…
GO:1902652	secondary alcohol metabolic process	104	-0.533269	-1.93633	1.83e-05	0.000797173	0.000686232	1872	tags=41%, list=13%, signal=36%	Abca2/Soat1/Por/Sec14l2/Fdxr/Lipe/Fgf1/Dgat2/Cyp46a1/Lpcat3/Hsd17b7/Pmvk/Cln6/Srebf2/Disp3/Acadl/Lmf1/Npc1/Hmgcs2/Apoe/Aplp2/Fdps/Sqle/Tm7sf2/Sc5d/Idi1/Nsdhl/Hmgcr/Mvk/Msmo1/Hmgcs1/Ldlr/Sod1/Stard4/Fdft1/Dhcr7/Dhcr24/Cyp51/Abca5/Vldlr/Lss/Insig1/Mvd
GO:0016125	sterol metabolic process	100	-0.543636	-2.00151	2.2e-05	0.00092089	0.000792732	1872	tags=44%, list=13%, signal=38%	Abca2/Soat1/Por/Sec14l2/Fdxr/Lipe/Fgf1/Erg28/Dgat2/Cyp46a1/Lpcat3/Hsd17b7/Pmvk/Cln6/Srebf2/Disp3/Acadl/Lmf1/Npc1/Hmgcs2/Apoe/Aplp2/Fdps/Sqle/Tm7sf2/Sc5d/Idi1/Nsdhl/Hmgcr/Mvk/Msmo1/Hmgcs1/Ldlr/Sod1/Stard4/Fdft1/Dhcr7/Dhcr24/Cyp51/Abca5/Vldlr/Lss/Insig1/Mvd
GO:0043068	positive regulation of programmed cell death	462	0.531117	1.38176	2.22e-05	0.00092089	0.000792732	2892	tags=31%, list=21%, signal=26%	Nox4/Gbp3/Cd44/Net1/Casp8/Casp12/Fas/Gbp5/Melk/Cyp1b1/Ifit2/Hmox1/Ctss/Ccn1/Gbp2/Top2a/Igfbp3/Cd274/Itga1/Irf8/Foxp1/Pla2g4a/Socs1/Ect2/Ano6/Adamtsl4/Tnfrsf12a/Bbc3/Capn1/Lpar1/Bard1/Hpgd/Eif2ak2/Zbtb16/Htatip2/Cav1/Ahr/Ctsc/Ptprc/Pml/E2f1/Mybl2/Map3k20/Pik3cd/Cdc34/Itpr1/Dapk1/Tspo/Stpg1/Gadd45g/Ccn2/Tlr4/Uaca/Fank1/Cdkn1a/Clip3/Skil/Pawr/Scrib/Itga4/Mcl1/Tnfrsf1a/Casp1/Rhob/Nck2/Pea15a/Chek2/Sa…
GO:0035457	cellular response to interferon-alpha	12	0.930118	1.78498	2.48e-05	0.00101182	0.000871011	195	tags=17%, list=1%, signal=16%	Ifit1/Ifit2
GO:0051276	chromosome organization	470	0.531341	1.38348	2.53e-05	0.00101678	0.000875276	2801	tags=29%, list=20%, signal=24%	Psrc1/Cenph/Atf7ip2/Parp3/Top2a/Uhrf1/Kif11/Birc5/Flna/Nek6/Bub1b/Brip1/Aaas/Dlgap5/Knl1/Esco2/Kif18a/Racgap1/Spc25/Kif23/Cenpk/Kifc1/Tpx2/Gen1/Rmi2/Sgo2a/Cdca8/Sp100/Zwilch/Wdhd1/Cenpp/Fancd2/Cenpn/Blm/Pml/Kntc1/Cenpi/Tacc3/Ttk/Mybl2/Ndc80/Cenpe/Ddx11/Setdb2/Ncapg2/Knstrn/Mad2l1/Incenp/Cenpa/Hmga2/Tep1/Slf2/Kif14/Cdk5rap2/Cit/Rad54l/Ncapd2/Stag3/Ccsap/Rtel1/Chek2/Cip2a/Ascc3/Rec8/Cdk2/Dna2/Rad51…
GO:0002521	leukocyte differentiation	416	0.535674	1.39296	2.67e-05	0.00104929	0.000903259	1550	tags=20%, list=11%, signal=19%	Sbno2/Bcl3/Cd44/Casp8/Rsad2/Fas/Lgals9/Clec2d/Jag2/Runx1/Il6ra/Dock10/Junb/Fos/Tcirg1/Ptprj/Stat3/Rbp1/Cd74/B2m/Igtp/Irf8/Foxp1/Socs1/Hspb1/Tnfrsf11b/Prkca/Fosl2/Clcf1/Cd109/Itpkb/Zbtb16/Ahr/Mndal/Fancd2/Lrrk1/Blm/Ptprc/Cracr2a/Cdk6/Ctla2a/Plcl2/Gab2/Gadd45g/Hells/Tlr4/Tgfbr2/Cebpb/Csf1/Tcf7/Dock2/Trem2/Plcg2/Fcer1g/Fbn1/Stat5a/Trib1/Flt3l/Tyrobp/Ikzf1/Polm/Nrros/Itgam/Snx10/Mapk14/St3gal1/Gpr137…
GO:0051701	biological process involved in interaction with host	101	0.661108	1.6419	3.8e-05	0.0014069	0.0012111	1433	tags=24%, list=10%, signal=21%	Trim30a/Trim30d/Gbp3/Gbp6/Ifitm3/Trim34a/Icam1/Gbp7/Trim25/Gbp2/Ifitm7/Cd74/Trim21/Cav1/Vamp8/Trim5/Trim12a/Trim26/Ly6e/Trim56/Hs3st5/Trim68/Trim12c/Lgals1
GO:0031342	negative regulation of cell killing	17	0.880021	1.80864	4.84e-05	0.00170462	0.00146739	1420	tags=71%, list=10%, signal=63%	Lgals9/H2-Q4/Clec2d/Tap1/H2-Q7/H2-D1/H2-T22/Ptprc/Tap2/H2-T23/Arrb2/H2-K1
GO:0045785	positive regulation of cell adhesion	328	0.554455	1.43543	5.14e-05	0.00178621	0.00153763	2314	tags=30%, list=17%, signal=25%	Irgm1/Fmn1/Cd44/Icam1/Lgals9/H2-Q4/Runx1/Il6ra/Dysf/Ptprj/Spp1/Ccn1/Angpt1/Apbb1ip/H2-Q7/Cd274/Cd74/B2m/Flna/Flot1/Socs1/Gcnt2/Prkca/Igfbp2/H2-D1/Capn1/Vwc2/Itpkb/Zbtb16/H2-T22/Cav1/Aif1/Pde4d/Blm/Ptprc/Cdh13/Smoc1/Ecm2/Frmd5/Cdk6/Rac3/Smoc2/Adam19/Fn1/Ccr5/Tgfbr2/Iqgap1/H2-T23/Pdpn/Tjp1/Gpam/Csf1/Chst2/Dock5/Pawr/Itga4/Nck2/Stat5a/Itga5/Lamc1/Disc1/S100a10/Col16a1/Col8a1/Irf1/Plekha2/Ppm1f/H2-K1…
GO:0001525	angiogenesis	371	0.538549	1.3962	5.36e-05	0.00183856	0.00158269	2033	tags=26%, list=15%, signal=23%	Sulf1/Cxcl10/Adam12/Casp8/C3/Anxa3/Klf5/Thbs2/Runx1/Stat1/Dysf/Ccl12/Cyp1b1/Hmox1/Ephb2/Ccn1/Angpt1/Stat3/Fbln5/Rnf213/Flna/Sparc/Hspb1/Brca1/Prkca/Arhgap22/Tnfrsf12a/E2f7/Minar2/Anxa2/Sp100/Htatip2/Cav1/Ahr/Hspg2/Sema5a/Stab1/Cdh13/Pml/Rhoj/Notch3/Gpx1/Pik3cd/Hspb6/Hc/Fgf18/Smoc2/Acvr1/Fn1/Cemip2/Ccn2/Tgfbr2/Parva/Hk2/Tjp1/Rock2/Elk3/Hmga2/Adamts1/Thsd7a/Tnfrsf1a/Atp2b4/Rhob/Cnmd/Smad1/Adam15/It…
GO:0045765	regulation of angiogenesis	185	0.59524	1.52145	9.4e-05	0.00285805	0.00246031	2556	tags=37%, list=18%, signal=30%	Sulf1/Cxcl10/Adam12/C3/Anxa3/Thbs2/Runx1/Stat1/Cyp1b1/Hmox1/Stat3/Fbln5/Sparc/Hspb1/Brca1/Prkca/Tnfrsf12a/Sp100/Htatip2/Sema5a/Stab1/Pml/Rhoj/Pik3cd/Hspb6/Hc/Fgf18/Smoc2/Tgfbr2/Hk2/Tjp1/Rock2/Hmga2/Adamts1/Tnfrsf1a/Atp2b4/Rhob/Cnmd/Smad1/Itga5/Plxnd1/Sema3e/Ctsh/Gadd45a/Fgf2/Rras/Lgals3/Jcad/Ets1/Pik3cb/Stard13/Ddah1/S100a1/Ecm1/Hgs/Lif/Nras/Epn1/Nrp1/Tcf4/Gab1/Wnt5a/Pde3b/Egln1/Rela/Hgf/Shc1/Prk…
GO:0030522	intracellular receptor signaling pathway	251	0.568096	1.46568	0.00011258	0.00332825	0.00286506	1991	tags=22%, list=14%, signal=19%	Ddx60/Trim30a/Irgm1/Irf7/Rsad2/Gbp5/Ifih1/Irgm2/Zc3hav1/Trim25/Dhx58/Esr1/Gbp2/Stat3/Igtp/Flot1/Foxp1/Brca1/Eif2ak2/Cav1/Mndal/Colec12/Pml/Unc93b1/Tlr4/Rbfox2/Hmga2/Pik3ap1/Trem2/Hcfc2/Plcg2/Cyp7b1/Trim68/Bdnf/Irf1/Asxl1/Ezh2/Ncoa3/Rnf135/Trp63/Pdk3/Rxra/Nfkbia/Nod1/Esrrg/Nop53/Irf2/Tgif1/Rhoa/Nploc4/Pcbp2/Tirap/Erbin/Atat1/Ar
GO:0035455	response to interferon-alpha	20	0.844152	1.77929	0.000119968	0.00350792	0.00301973	468	tags=30%, list=3%, signal=29%	Ifit1/Bst2/Ifitm3/Ifit2/Ifitm7/Eif2ak2
GO:2001251	negative regulation of chromosome organization	82	0.668031	1.64332	0.000136078	0.00393598	0.00338822	2274	tags=34%, list=16%, signal=29%	Top2a/Birc5/Bub1b/Knl1/Spc25/Gen1/Cdca8/Zwilch/Pml/Kntc1/Ttk/Ndc80/Cenpe/Mad2l1/Incenp/Cdk5rap2/Rtel1/Mnat1/Nuf2/Spc24/Acd/Dcp2/Ccnb1/Anapc15/Tex14/Mad1l1/Cep192/Trp53
GO:0043903	regulation of biological process involved in symbiotic interaction	45	0.741602	1.72319	0.000139183	0.00396152	0.0034102	1433	tags=44%, list=10%, signal=40%	Trim30a/Trim30d/Ifitm3/Trim34a/Trim25/Ifitm7/Cd74/Cxcl5/Trim21/Cav1/Trim5/Trim12a/Trim26/Pomc/Ly6e/Trim56/Hs3st5/Trim68/Trim12c/Lgals1
GO:0032970	regulation of actin filament-based process	312	0.544508	1.40697	0.000146386	0.00414449	0.00356772	2759	tags=32%, list=20%, signal=26%	Nox4/Iqgap2/Fmn1/Asap3/Bst2/Met/Icam1/Shank3/Avil/Add3/Trpm4/Tmeff2/Flna/Ect2/Capn1/Lpar1/Plekhh2/Cav1/Rhpn1/Sema5a/Pde4d/Tmod3/Rac3/Cttn/Ssh2/Arhgap44/Ccn2/Pdpn/Tjp1/Rock2/Akap13/Plekhg2/Nos1/Myo1c/Cit/Nck2/Synpo/Pdlim4/Pfn1/Baiap2/S100a10/Cdc42ep4/Pak3/Ank2/Nf2/Fxyd1/Ppm1f/Arhgef5/Synpo2/Mtss1/Myh9/Rhoc/Cdk10/Plek/Arpc5/Pde4b/Rhoa/Coro1a/Wdr1/Ssh3/Cacna1c/Nedd9/Fam107a/Arf6/Prkcq/Vasp/Jam3/Tmod…
GO:0051090	regulation of DNA-binding transcription factor activity	268	0.553294	1.42796	0.00016276	0.0045126	0.00388459	2598	tags=27%, list=19%, signal=22%	Trim30a/Nlrc5/Bcl3/Trim30d/Traf1/Parp10/Trim34a/Anxa3/Trim25/Cyp1b1/Arid5b/Esr1/Trim14/Flna/Eda2r/Slco3a1/Ror1/Lrrfip1/Trim21/Eif2ak2/Sp100/Fancd2/Cys1/Tacc3/Ankrd42/Rtkn2/Trim5/Tlr4/Traip/Fank1/Ddr2/Trim12a/Il1rap/Plcg2/Aim2/Trim26/Trib1/Sav1/Arrb2/Trim68/Bdnf/Trim12c/Fanca/Kit/Ezh2/Arhgef5/Traf3/Anxa4/Nfkbia/Nod1/Tgfbr3/Rnf31/Tirap/Erbin/Ar/Prkcq/Sri/Prmt2/Stk36/Cd200/Map3k10/Nupr1/Smarca4/Rab7…
GO:0019882	antigen processing and presentation	62	0.700596	1.69578	0.000176147	0.00480899	0.00413974	2286	tags=48%, list=16%, signal=41%	Icam1/H2-Q4/Psmb8/Mill2/Tap1/Ctss/H2-Q7/Cd74/B2m/H2-D1/Psmb9/H2-T22/Tap2/Unc93b1/Rab27a/H2-T23/Ext1/Trem2/Fcer1g/Psme2/H2-K1/Ifi30/Nod1/H2-DMa/Lgmn/Rab8b/Ighm/Psme1/Tapbp/Hfe
GO:1903599	positive regulation of autophagy of mitochondrion	14	0.873138	1.71934	0.000183822	0.00499304	0.00429817	297	tags=21%, list=2%, signal=21%	Irgm1/Irgm2/Igtp
GO:0042770	signal transduction in response to DNA damage	150	0.609277	1.55087	0.000189128	0.00504656	0.00434424	2274	tags=28%, list=16%, signal=24%	Bcl3/Cd44/Parp9/Ier3/Cd74/Clspn/Dtl/Brca1/Dtx3l/E2f7/Bard1/Ccnd1/Sp100/Fancd2/Blm/Pml/E2f1/Map3k20/Cdkn1a/D7Ertd443e/Nek11/Chek2/Chek1/Mapk14/Sesn2/Rad51/Gadd45a/Brca2/Ints7/Wdr76/Ccng1/Nop53/Stk33/Rhno1/Muc1/Topbp1/Foxo3/Ticrr/Rpa2/Znhit1/Taok3/Trp53
GO:0051304	chromosome separation	63	0.698046	1.69439	0.000187931	0.00504656	0.00434424	2262	tags=46%, list=16%, signal=39%	Top2a/Birc5/Bub1b/Knl1/Spc25/Gen1/Cdca8/Zwilch/Kntc1/Ttk/Ndc80/Cenpe/Ncapg2/Mad2l1/Incenp/Cdk5rap2/Ncapd2/Nuf2/Spc24/Smc4/Ncapg/Smc2/Espl1/Ccnb1/Anapc15/Tex14/Anapc7/Mad1l1/Cep192
GO:0141060	disruption of anatomical structure in another organism	23	0.819704	1.75988	0.000193411	0.00512349	0.00441046	692	tags=39%, list=5%, signal=37%	Gbp3/Cxcl10/Gbp5/Irgm2/Gbp7/Gbp2/Igtp/Cxcl5/Hc
GO:0006935	chemotaxis	256	0.551132	1.42225	0.000217393	0.00564693	0.00486106	2556	tags=34%, list=18%, signal=29%	Cxcl10/Met/Lgals9/Trpm4/Dysf/Ccl12/Ptprj/Spp1/Ccn1/Angpt1/Cd74/Itga1/Sema3c/Hspb1/Ano6/Cxcl5/Prkca/Tiam1/Lpar1/Rin3/Aif1/Ntn1/Sema5a/Pde4d/Cdh13/Rac3/Pik3cd/Hmgb2/Cttn/Hc/Fgf18/Smoc2/Bcar1/Sema6d/Fn1/Ccr5/Parva/Csf1/Itga9/Dock2/Trem2/Myo9b/Scrib/Robo3/Fcer1g/Tubb2b/Tafa4/Lrtm2/Cyp7b1/Arrb2/Itgam/Sema3d/Sema3e/Lrtm1/Sema6c/Kit/Ppm1f/Fgf2/Arhgef5/Lef1/Plekhg5/Lgals3/Ptpro/Pde4b/Pdgfb/Rarres2/Rhoa/C…
GO:0042327	positive regulation of phosphorylation	495	0.508472	1.32438	0.000225593	0.0056749	0.00488513	2194	tags=24%, list=16%, signal=21%	Nox4/Irgm1/Parp14/Grm5/Cd44/Alk/Fas/C3/Met/Icam1/Parp9/Irgm2/Prr5l/Il6ra/Psrc1/Ptprj/Camkk2/Ccn1/Angpt1/Birc5/Cemip/Cd74/Igtp/Flot1/Slco3a1/Socs1/Ect2/Clspn/Ror1/Gpnmb/Prkca/Tpx2/Stox1/Ehd4/Clcf1/Ccnd1/Cdca8/Anxa2/Cav1/Aif1/Pde4d/Lrrk1/Ptprc/Stil/Fgf18/Acvr1/Cenpe/Ccn2/Tlr4/Iqgap1/Mt3/Iqgap3/Rock2/Csf1/Cdkn1a/Ddr2/Irs1/Incenp/Nos1/Hmga2/Clip3/Trem2/Kif14/Plcg2/Ttbk1/Tnfrsf1a/Atp2b4/Fbn1/Chek2/Ddr…
GO:0043254	regulation of protein-containing complex assembly	344	0.530205	1.37273	0.000225818	0.0056749	0.00488513	2140	tags=22%, list=15%, signal=19%	Trim30a/Irgm1/Fmn1/Fas/Isg15/Met/Icam1/Xaf1/Gbp5/Irgm2/Avil/Add3/Psrc1/Gbp2/Igtp/Spidr/Stxbp6/Bbc3/Capn1/Msn/Eif2ak2/Med25/Cav1/Ahr/Mndal/Tmod3/Cttn/Sgk1/Ssh2/Tlr4/Plekhg2/Eml2/Clip3/Slf2/Trem2/Kif14/Cdk5rap2/Plcg2/Myo1c/Ttbk1/Nck2/Pfn1/Baiap2/Arhgef7/Abca1/Ikzf1/Stxbp5/Cdc42ep4/Pak3/Hrk/Arhgef5/Lcp1/Ncln/Mpp7/Rhoc/Kif9/Plek/Lgals3/Arpc5/Nop53/Rhoa/Tbcd/Coro1a/Tirap/Ssh3/Atat1/Arf6/Vasp/Jam3/Tmod…
GO:0002526	acute inflammatory response	44	0.735419	1.70482	0.000226703	0.0056749	0.00488513	1045	tags=34%, list=7%, signal=32%	Serpina3n/C3/Icam1/H2-Q4/Stat3/H2-Q7/Ano6/H2-D1/H2-T22/Acvr1/Fn1/Ccr5/H2-T23/Ext1/Fcer1g
GO:0002520	immune system development	147	0.594045	1.50913	0.000279041	0.00663621	0.00571267	1637	tags=22%, list=12%, signal=20%	Bcl3/Samd9l/Fas/H2-Q4/Runx1/Parp3/H2-Q7/Cd274/Foxp1/Exo1/H2-D1/Clcf1/Samhd1/H2-T22/Ahr/Ptprc/Tgfbr2/H2-T23/Pdpn/Tcf7/Polq/Stat5a/Adar/Ikzf1/Polm/Asxl1/Ezh2/H2-K1/Ccnb2/Lef1/Stat6/Nfkbiz/Icosl
GO:0052372	modulation by symbiont of entry into host	41	0.744814	1.71496	0.000285411	0.00675766	0.00581722	1433	tags=44%, list=10%, signal=40%	Trim30a/Trim30d/Ifitm3/Trim34a/Trim25/Ifitm7/Cd74/Trim21/Cav1/Trim5/Trim12a/Trim26/Ly6e/Trim56/Hs3st5/Trim68/Trim12c/Lgals1
GO:0070269	pyroptosis	20	0.828257	1.74578	0.000292967	0.00690602	0.00594493	1072	tags=45%, list=8%, signal=42%	Gbp3/Casp8/Gbp5/Gbp2/Trim21/Map3k20/Trem2/Aim2/Casp1
GO:0019884	antigen processing and presentation of exogenous antigen	24	0.810463	1.75259	0.000308937	0.00718748	0.00618722	2161	tags=75%, list=15%, signal=64%	H2-Q4/Ctss/H2-Q7/Cd74/B2m/H2-D1/H2-T22/Tap2/Unc93b1/H2-T23/Fcer1g/Psme2/H2-K1/Ifi30/H2-DMa/Lgmn/Psme1/Tapbp
GO:0002507	tolerance induction	14	0.863303	1.69997	0.000322914	0.00741593	0.00638387	800	tags=57%, list=6%, signal=54%	H2-Q4/Runx1/H2-Q7/Cd274/H2-D1/H2-T22/Tgfbr2/H2-T23
GO:0044403	biological process involved in symbiotic interaction	170	0.578588	1.47499	0.000357086	0.00816568	0.00702928	1861	tags=21%, list=13%, signal=19%	Trim30a/Trim30d/Gbp3/Gbp6/Ifitm3/Trim34a/Icam1/Gbp7/Trim25/Gbp2/Ifitm7/Cd74/Cxcl5/Trim21/Cav1/Vamp8/Gpx1/Fn1/Trim5/Rock2/Trim12a/Hmga2/Trim26/Pomc/Ly6e/Trim56/Hs3st5/Trim68/Trim12c/Lgals1/Lef1/Rab29/Ifitm2/Napepld/Jun/Zfyve1
GO:0000768	syncytium formation by plasma membrane fusion	41	0.737446	1.698	0.000406644	0.00888144	0.00764544	1490	tags=44%, list=11%, signal=39%	Sbno2/Cxcl10/Cd44/Stat1/Flot1/Nfatc2/Cd109/Tanc1/Ehd2/Dock2/Dock5/Trem2/Casp1/Flt3l/Tyrobp/Mapk14/Adamts5/Myh9
GO:0140253	cell-cell fusion	41	0.737446	1.698	0.000406644	0.00888144	0.00764544	1490	tags=44%, list=11%, signal=39%	Sbno2/Cxcl10/Cd44/Stat1/Flot1/Nfatc2/Cd109/Tanc1/Ehd2/Dock2/Dock5/Trem2/Casp1/Flt3l/Tyrobp/Mapk14/Adamts5/Myh9
GO:0051306	mitotic sister chromatid separation	48	0.718939	1.67793	0.000413996	0.00900526	0.00775202	2262	tags=46%, list=16%, signal=39%	Birc5/Bub1b/Knl1/Spc25/Gen1/Cdca8/Zwilch/Kntc1/Ttk/Ndc80/Cenpe/Mad2l1/Incenp/Cdk5rap2/Nuf2/Spc24/Ccnb1/Anapc15/Tex14/Anapc7/Mad1l1/Cep192
GO:0033865	nucleoside bisphosphate metabolic process	80	-0.506988	-1.76756	0.000483102	0.00998099	0.00859197	1782	tags=31%, list=13%, signal=27%	Fitm2/Nudt7/Dgat2/Pank3/Acaca/Pmvk/Slc25a42/Acot11/Acsl4/Papss2/Hmgcs2/Snca/Acsm5/Acsl6/Hmgcr/Mvk/Hmgcs1/Acsl3/Acaa2/Pank1/Acot6/Acly/Acsl1/Mvd/Acss2
GO:0022612	gland morphogenesis	104	0.617884	1.54164	0.000485759	0.00999729	0.008606	2546	tags=38%, list=18%, signal=32%	Sulf1/Cd44/Met/Esr1/Sema3c/Capn1/Msn/Cav1/Ntn1/Mki67/Pml/Csmd1/Fgf18/Sulf2/Itpr1/Tgfbr2/Cebpb/Csf1/Btbd7/Scrib/Cyp7b1/Stat5a/Ddr1/Plxnd1/Btrc/Ncoa3/Stat6/Trp63/Rxra/Pdgfb/Bcl2/Lims2/Ar/Nrp1/Lims1/Wnt5a/Twsg1/Ctnnd1/Robo1/Hgf
GO:0043123	positive regulation of canonical NF-kappaB signal transduction	106	0.622914	1.55729	0.000577701	0.0113616	0.00978043	1963	tags=30%, list=14%, signal=26%	Trim30a/Trim30d/Casp8/Trim34a/Zc3hav1/Trim25/Cd74/Flot1/Eda2r/Ror1/Trim21/Cav1/Trim5/S100a13/Tlr4/Akap13/S100a4/Trim12a/Tnfrsf1a/Casp1/Tmem106a/Irak4/Lurap1l/Tab2/Trim68/Trim12c/Fbxw11/Nod1/Rnf31/Rhoa/Flot2/Tirap
GO:0006949	syncytium formation	43	0.723262	1.6721	0.000583793	0.011401	0.00981435	1490	tags=42%, list=11%, signal=38%	Sbno2/Cxcl10/Cd44/Stat1/Flot1/Nfatc2/Cd109/Tanc1/Ehd2/Dock2/Dock5/Trem2/Casp1/Flt3l/Tyrobp/Mapk14/Adamts5/Myh9
GO:0002377	immunoglobulin production	81	0.643445	1.57929	0.000608966	0.0117574	0.0101212	1944	tags=30%, list=14%, signal=26%	Fas/H2-Q4/Parp3/Tcirg1/Ephb2/H2-Q7/Foxp1/Exo1/H2-D1/Clcf1/Samhd1/H2-T22/Ptprc/H2-T23/Polq/Fbn1/Polm/Ezh2/H2-K1/Stat6/Nfkbiz/Icosl/Crlf2/Ighm
GO:0048285	organelle fission	377	0.516858	1.34006	0.000856353	0.0156707	0.0134899	2707	tags=29%, list=19%, signal=24%	Irgm1/Met/Stat2/Irgm2/Psrc1/Rad51ap1/Esr1/Top2a/Uhrf1/Kif11/Birc5/Igtp/Pde3a/Flna/Bub1b/Brip1/Aaas/Knl1/Mybl1/Kif18a/Racgap1/Spc25/Kif23/Cenpk/Kifc1/Tpx2/Gen1/Sgo2a/Cdca8/Zwilch/Fancd2/Mki67/Rad54b/Kntc1/Cenpi/Ttk/Mybl2/Cks2/Ndc80/Cenpe/Ncapg2/Knstrn/Mad2l1/Incenp/Kif14/Mief2/Cdk5rap2/Aspm/Hfm1/Cit/Rad54l/Ncapd2/Stag3/Ccsap/Chek2/Chek1/Rec8/Rad51c/Syde1/Rad51/Fanca/Nuf2/Cpeb1/Brca2/Ccne1/Ccnb2/Sh…
GO:0006979	response to oxidative stress	296	0.519896	1.34419	0.000858067	0.0156707	0.0134899	3053	tags=29%, list=22%, signal=23%	Net1/Slc8a1/Met/Msrb3/Oxr1/Prr5l/Trim25/Fos/Cyp1b1/Lpo/Hmox1/Pcgf2/Fbln5/Foxp1/Ect2/Hspb1/Prkca/Capn1/Stox1/Aif1/Fancd2/Gsr/Pml/Slc25a24/Gpx1/Dapk1/Aldh3b1/Tlr4/Mt3/Ddr2/Rcan2/Pawr/Naprt/Rhob/Sesn2/Ezh2/Lig1/Prdx6/Stat6/Mgst1/Pnpt1/Rcan1/Aldh1a1/Ercc3/Cd38/Ercc2/Jun/Bcl2/Stk25/Ncoa7/Prkcd/Foxo3/Foxo1/Trp53/Apod/Usp25/Dhfr/Stx2/Rbpms/Trp53inp1/Gab1/Txnrd1/Rela/Ogg1/Hgf/Mgat3/Map2k1/Rnf112/Slc7a11/…
GO:0007259	receptor signaling pathway via JAK-STAT	95	0.614977	1.52125	0.0008702	0.0157922	0.0135945	2028	tags=32%, list=15%, signal=27%	Bcl3/Socs3/Parp14/Parp9/Stat2/Stat1/Il6ra/Cyp1b1/Ephb2/Stat3/Socs1/Cxcl5/Clcf1/Cav1/Ptprc/Hmga2/Tnfrsf1a/Stat5a/Csf2ra/Gadd45a/Irf1/Kit/Nf2/Nlk/Stat6/Cenpj/Adipor1/Il10rb/Hgs/Lif
GO:0043032	positive regulation of macrophage activation	13	0.87022	1.68282	0.000977688	0.017313	0.0149036	1044	tags=54%, list=7%, signal=50%	Irgm1/Lgals9/Pla2g4a/Ctsc/Tlr4/Trem2/Ttbk1
GO:0051208	sequestering of calcium ion	82	0.637198	1.56748	0.00098955	0.0173609	0.0149449	2203	tags=32%, list=16%, signal=27%	Plce1/Cxcl10/Slc8a1/Cemip/Flna/Hap1/Dbi/Pde4d/Htr2c/Ptprc/Plch2/Itpr1/Ccr5/Plch1/Plcg2/Atp7b/Ank2/Fgf2/P2rx7/Camk2d/Ibtk/Coro1a/Htt/Sri/Plcb4/Npsr1
GO:0034502	protein localization to chromosome	99	0.623874	1.54875	0.000997324	0.0174401	0.015013	2379	tags=31%, list=17%, signal=26%	Parp3/Esr1/Bub1b/Knl1/Esco2/Spidr/Zwilch/Vrk1/Pml/Kntc1/Ttk/Scml2/Cenpa/Slf2/Lrwd1/Mms22l/Stag3/Mcm8/Ezh2/Brca2/Lef1/Mtbp/Acd/Zmynd8/Rhno1/Snhg15/Topbp1/Rpa2/Daxx/Brd2/Pphln1
GO:0002009	morphogenesis of an epithelium	375	0.502537	1.30327	0.00100325	0.0174749	0.015043	2638	tags=28%, list=19%, signal=23%	Sulf1/Socs3/Fmn1/Cxcl10/Cd44/Casp8/Met/Shank3/Jag2/Runx1/Tmeff2/Ccn1/Esr1/Angpt1/Timeless/Flna/Sema3c/Foxp1/Kif20b/Tgfb1i1/Stox1/Col5a1/Msn/Ahr/Ntn1/Sema5a/Pml/Stil/Pik3cd/Csmd1/Acvr1/Shroom3/Mrtfa/Tgfbr2/Pdpn/Rock2/Csf1/Ext1/Mthfd1l/Btbd7/Hmga2/Scrib/Rhob/Plxnb2/Cyp7b1/Stat5a/Pfn1/Ddr1/Lamc1/Plxnd1/Bmp5/Sema3e/Spag6l/Hs3st3b1/Ctsh/Btrc/Fgf2/Ncoa3/Frem2/Lef1/Mtss1/Trp63/Ift172/Rxra/Aldh1a1/Mthfr/…
GO:0051282	regulation of sequestering of calcium ion	80	0.636245	1.56054	0.00105048	0.0179016	0.0154103	2203	tags=31%, list=16%, signal=26%	Plce1/Cxcl10/Slc8a1/Cemip/Flna/Hap1/Dbi/Pde4d/Htr2c/Ptprc/Plch2/Itpr1/Ccr5/Plch1/Plcg2/Ank2/Fgf2/P2rx7/Camk2d/Ibtk/Coro1a/Htt/Sri/Plcb4/Npsr1
GO:0002437	inflammatory response to antigenic stimulus	30	0.748355	1.6741	0.00117146	0.019589	0.0168628	1045	tags=43%, list=7%, signal=40%	C3/Icam1/H2-Q4/H2-Q7/H2-D1/Fosl2/H2-T22/Gpx1/Hmgb2/H2-T23/Ext1/Trem2/Fcer1g
GO:1901978	positive regulation of cell cycle checkpoint	14	0.83801	1.65017	0.00125744	0.0203895	0.017552	880	tags=57%, list=6%, signal=54%	Birc5/Knl1/Gen1/Cdca8/Map3k20/Ndc80/Mad2l1/Incenp
GO:0009595	detection of biotic stimulus	22	0.797693	1.69615	0.00127043	0.0204146	0.0175735	1750	tags=45%, list=13%, signal=40%	H2-Q4/Ssc5d/H2-Q7/H2-D1/Tspo/Tlr4/Trem2/H2-K1/Nod1/Ly96
GO:0018108	peptidyl-tyrosine phosphorylation	199	0.54935	1.40671	0.00129228	0.0207036	0.0178223	1388	tags=19%, list=10%, signal=17%	Nox4/Socs3/Parp14/Grm5/Cd44/Alk/Icam1/Parp9/Il6ra/Ptprj/Ephb2/Angpt1/Cd74/Socs1/Prkca/Ehd4/Clcf1/Cav1/Lrrk1/Ptprc/Ttk/Acvr1/Tlr4/Iqgap1/Ddr2/Wee1/Trem2/Plcg2/Ttbk1/Tnfrsf1a/Stat5a/Ddr1/Itga5/Arrb2/Pdgfc/Irf1/Kit/Nf2
GO:0001667	ameboidal-type cell migration	328	0.518147	1.34143	0.0013175	0.0208025	0.0179075	2783	tags=31%, list=20%, signal=25%	Slc8a1/Met/Anxa3/Timp1/Prr5l/Cyp1b1/Arid5b/Hmox1/Angpt1/Sema3c/Foxp1/Sparc/Hspb1/Irs2/Prkca/Sp100/Sema5a/Cdh13/Pml/Rhoj/Glipr2/Gpx1/Pik3cd/Fgf18/Smoc2/Acvr1/Bcar1/Sema6d/Fn1/Gab2/Tgfbr2/Crb2/Iqgap1/Rock2/Ddr2/Irs1/Dock5/Plcg2/Itga4/Atp2b4/Rhob/Stat5a/Pfn1/Plxnd1/Pak3/Sema3d/Sema3e/Spag6l/Sema6c/Syde1/Ctsh/Gadd45a/Kit/Ppm1f/Fgf2/Ptpn23/Iqsec1/Pdlim1/Myh9/Cdh2/Rras/Plekhg5/Fstl1/Jcad/Tgfbr3/Arsb/Pt…
GO:1990266	neutrophil migration	57	0.683991	1.64231	0.00132178	0.0208025	0.0179075	2137	tags=39%, list=15%, signal=33%	Cxcl10/Il1r1/Dysf/Ccl12/Spp1/Cd74/Itga1/Cxcl5/Prkca/Pde4d/Rac3/Itga9/Pawr/Fcer1g/Itgam/Irak4/Lgals3/Pde4b/Wdr1/Tirap/Jam3/Mcu
GO:0097396	response to interleukin-17	19	0.817617	1.71321	0.00131936	0.0208025	0.0179075	262	tags=21%, list=2%, signal=21%	Socs3/Cxcl10/Shank3/Stat3
GO:0007159	leukocyte cell-cell adhesion	224	0.534796	1.37368	0.00134264	0.0209927	0.0180712	2480	tags=31%, list=18%, signal=26%	Irgm1/Cd44/Icam1/Lgals9/H2-Q4/Runx1/H2-Q7/Cd274/Cd74/B2m/Socs1/Hspb1/Gpnmb/Ildr2/Igfbp2/H2-D1/Capn1/Msn/Itpkb/Zbtb16/H2-T22/Cav1/Aif1/Blm/Ptprc/Tgfbr2/H2-T23/Cebpb/Gpam/Ext1/Chst2/Pawr/Scrib/Itga4/Nck2/Stat5a/Itga5/Itgam/Irf1/H2-K1/Lgals1/Lef1/Nfkbiz/Erbb2/Lgals3/Pde5a/Adk/Icosl/H2-DMa/Slc7a1/Ets1/Rhoa/Coro1a/Flot2/Prkcq/Ptpn22/Rasgrp1/Slc4a2/Laptm5/Mad1l1/Brd2/Klhl25/Loxl3/Hfe/Smarca4/Twsg1/Ppp3…
GO:0002524	hypersensitivity	11	0.875922	1.64892	0.00134564	0.0209927	0.0180712	1420	tags=82%, list=10%, signal=74%	C3/H2-Q4/H2-Q7/H2-D1/H2-T22/H2-T23/Ext1/Fcer1g/H2-K1
GO:0002863	positive regulation of inflammatory response to antigenic stimulus	11	0.87605	1.64916	0.00134564	0.0209927	0.0180712	1420	tags=73%, list=10%, signal=65%	C3/H2-Q4/H2-Q7/H2-D1/H2-T22/H2-T23/Fcer1g/H2-K1
GO:0000281	mitotic cytokinesis	72	0.648191	1.58082	0.00140772	0.0217709	0.0187411	2151	tags=33%, list=15%, signal=28%	Iqgap2/Ckap2/Birc5/Ect2/Kif20b/Racgap1/Kif23/Cdca8/Iqgap1/Iqgap3/Rock2/Incenp/Cenpa/Exoc4/Cit/Rhob/Rhoc/Efhc1/Myh10/Rhoa/Klhdc8b/Mitd1/Anln/Daxx
GO:0044090	positive regulation of vacuole organization	23	0.774644	1.66314	0.00146051	0.022297	0.019194	312	tags=17%, list=2%, signal=17%	Irgm1/Irgm2/Igtp/Snx7
GO:0035235	ionotropic glutamate receptor signaling pathway	18	-0.775963	-2.06568	0.00153339	0.0232441	0.0200093	236	tags=56%, list=2%, signal=55%	Camk2a/Atp1a3/Grin3a/Grin2b/Plp1/Kalrn/Cdk5r1/Grin2c/Grik1/Cpeb4
GO:0006501	C-terminal protein lipidation	12	0.869057	1.6678	0.00160905	0.0241178	0.0207614	297	tags=25%, list=2%, signal=24%	Irgm1/Irgm2/Igtp
GO:0006310	DNA recombination	252	0.526575	1.35876	0.00172634	0.0253086	0.0217864	2303	tags=26%, list=16%, signal=22%	Cdc7/Parp3/Rad51ap1/Top2a/Timeless/Foxp1/Exo1/Brip1/Parpbp/Rad51b/Brca1/Spidr/Gen1/Rmi2/Bard1/Clcf1/Samhd1/Fancd2/Blm/Ptprc/Rad54b/Hmgb2/Rad18/Tcf7/Zgrf1/Tep1/Polq/Hfm1/Morf4l2/Mms22l/Rbbp8/Rad54l/Rtel1/Chek1/Polm/Rec8/Rad51c/Mcm8/Rad51/Ezh2/Lig1/Brca2/Lef1/Terb1/Stat6/Nfkbiz/Zmynd8/Icosl/Kdm4d/Palb2/Ercc2/Cdc45/Mcm6/Rhno1/Xrcc5/Topbp1/Fus/Zranb3/Nsd2/Rpa2/Inip/Ints3/Nsmce1/Actr5/Poln
GO:0018212	peptidyl-tyrosine modification	201	0.547226	1.40095	0.00175535	0.0256272	0.0220607	1388	tags=19%, list=10%, signal=17%	Nox4/Socs3/Parp14/Grm5/Cd44/Alk/Icam1/Parp9/Il6ra/Ptprj/Ephb2/Angpt1/Cd74/Socs1/Prkca/Ehd4/Clcf1/Cav1/Lrrk1/Ptprc/Ttk/Acvr1/Tlr4/Iqgap1/Ddr2/Wee1/Trem2/Plcg2/Ttbk1/Tnfrsf1a/Stat5a/Ddr1/Itga5/Arrb2/Pdgfc/Irf1/Kit/Nf2
GO:0070534	protein K63-linked ubiquitination	60	0.658114	1.58354	0.00179174	0.0259827	0.0223668	1441	tags=23%, list=10%, signal=21%	Trim30a/Trim30d/Traf1/Parp10/Rnf213/Arrdc4/Trim21/Ube2e2/Trim5/Trim12a/Trim56/Trim12c/Rnf135/Traf3
GO:0072593	reactive oxygen species metabolic process	164	0.563301	1.43279	0.00179794	0.0260021	0.0223835	1865	tags=23%, list=13%, signal=20%	Trim30a/Nox4/Slc5a3/Met/Cyp1b1/Ier3/Ccn1/Stat3/Fbln5/Brca1/Ahr/Gpx1/Rab27a/Immp2l/Tspo/Ccn2/Tlr4/Tgfbr2/Hk2/Mt3/Cdkn1a/Birc3/Plcg2/Tafa4/Tyrobp/Nrros/Itgam/Mapk14/Sesn2/Gadd45a/Prdx6/P2rx7/Pdk3/Tigar/Pdgfb/Pon3/Rhoa/Bcl2
GO:0070588	calcium ion transmembrane transport	215	0.540849	1.38778	0.00182597	0.0263363	0.0226712	2203	tags=27%, list=16%, signal=23%	Plce1/Cxcl10/Slc8a1/Nalcn/Cacna2d3/Cacnb2/Trpm4/Dysf/Cemip/Mrln/Flna/Cacna1a/Hap1/Ano6/Cav1/Ahr/Dbi/Cacna2d4/Pde4d/Htr2c/Ptprc/Pml/Ahnak/Rgs9/Cracr2a/Plch2/Itpr1/Ccr5/Ccn2/Plch1/Pawr/Plcg2/Atp2b4/Slc25a25/Catsper2/1810037I17Rik/Cacna1i/Ank2/Fgf2/P2rx7/Camk2d/Ibtk/Micu2/Pde4b/Sestd1/Bcl2/Coro1a/Cacna1c/Trpm6/Tspoap1/Htt/Fgf14/Sri/Mcu/Ptpn22/Plcb4/Npsr1
GO:0031664	regulation of lipopolysaccharide-mediated signaling pathway	19	0.80492	1.6866	0.00209544	0.0289863	0.0249523	1322	tags=42%, list=9%, signal=38%	Trim30a/Trim30d/Prkca/Ly86/Trim5/Trim12a/Trib1/Trim12c
GO:0010212	response to ionizing radiation	117	0.591013	1.4831	0.0022887	0.0311173	0.0267868	2274	tags=32%, list=16%, signal=27%	Net1/Rad51ap1/Ect2/Brca1/Spidr/Apobec1/Bbc3/Bard1/Mndal/Fancd2/Blm/Ptprc/Rad54b/Pml/Map3k20/Gpx1/Cdkn1a/D7Ertd443e/Rad54l/Rhob/Chek2/Mapk14/Rad51/Gadd45a/Brca2/Ints7/Tigar/Kdm4d/Bcl2/Rhno1/Xrcc5/Topbp1/Eef1d/Ticrr/Inip/Ints3/Trp53
GO:0000209	protein polyubiquitination	223	0.54046	1.38766	0.00232634	0.031277	0.0269243	3509	tags=34%, list=25%, signal=26%	Trim30a/Trim30d/Traf1/Parp10/Trim34a/Dysf/Trim25/Rnf213/Dtl/Brca1/Arrdc4/Dtx3l/Trim21/Bard1/Ube2l6/Fbxl7/Rnf144b/Ube2e2/Cdc34/Trim5/Birc3/Trim12a/D7Ertd443e/Rnf19b/Trim26/Trim56/Trim68/Trim12c/Btrc/Rnf135/Traf3/Fbxw11/Ube2q1/Dtx4/Wdr24/Rnf31/Klhl3/Bcl2/Dzip3/Ptpn22/Anapc7/Rnf217/Nmi/Jade2/Anapc2/Trip12/Rnf166/Rusc1/Rbck1/Cdc16/Chfr/Ube2h/Znrf1/Arel1/Pnkp/Wsb1/Map3k1/Trim3/Cbfb/Rnf126/Ercc8/Rnf168…
GO:0006637	acyl-CoA metabolic process	66	-0.521329	-1.76482	0.00242531	0.0319651	0.0275166	1982	tags=33%, list=14%, signal=29%	Mmut/Suclg1/Fitm2/Nudt7/Dgat2/Acaca/Pmvk/Acot11/Acsl4/Hmgcs2/Snca/Acsm5/Acsl6/Mvk/Hmgcs1/Acsl3/Acaa2/Acot6/Acly/Acsl1/Mvd/Acss2
GO:0070227	lymphocyte apoptotic process	60	0.65324	1.57181	0.00242048	0.0319651	0.0275166	2556	tags=40%, list=18%, signal=33%	Bcl3/Cd44/Casp8/Fas/Cd274/Cd74/Foxp1/Irs2/Bbc3/Blm/Gpam/Chek2/St3gal1/Prelid1/P2rx7/Nfkbiz/Lgals3/Casp7/Bcl2/Prkcq/Trp53/Wnt5a/Tnfrsf21/Prkd2
GO:0097696	receptor signaling pathway via STAT	101	0.603973	1.5	0.00250342	0.0327539	0.0281956	2028	tags=31%, list=15%, signal=26%	Bcl3/Socs3/Parp14/Parp9/Stat2/Stat1/Il6ra/Cyp1b1/Ephb2/Stat3/Socs1/Cxcl5/Clcf1/Cav1/Ptprc/Hmga2/Tnfrsf1a/Stat5a/Csf2ra/Gadd45a/Irf1/Kit/Nf2/Nlk/Stat6/Cenpj/Adipor1/Crlf2/Il10rb/Hgs/Lif
GO:0030162	regulation of proteolysis	428	0.494094	1.28474	0.00253438	0.0329162	0.0283353	2964	tags=25%, list=21%, signal=20%	A2m/Serpina3n/Cd44/Casp8/Fas/Timp1/Psmb8/Stat1/Serping1/Ctss/Ccn1/Stat3/Birc5/Rhbdf1/Tspan17/Bbc3/Tgfb1i1/Psmb9/Cast/Hspbp1/Mgmt/Cd109/Spink10/Cav1/Ctsc/Mndal/Pml/Sh3d19/Plat/Gpx1/Agbl4/Ctla2a/Mrtfa/Dapk1/Uaca/Crb2/Rock2/Ift88/Antxr1/Nek5/Trem2/Rnft2/Ttbk1/Aim2/Casp1/Trib1/Disc1/S100a10/St18/Pih1d1/Psme2/Ctsh/Itih5/Prelid1/Btrc/Xpo1/Ppm1f/Traf3/Usp13/Myh9/Fbxw11/Trp63/Nod1/Rybp/Nop53/Ptpn3/Axin2/…
GO:0043062	extracellular structure organization	212	0.532086	1.36448	0.00255223	0.0330677	0.0284658	1860	tags=29%, list=13%, signal=25%	Sulf1/Bcl3/Gfap/Adamtsl1/Aebp1/Col4a6/Cyp1b1/Ctss/Ccn1/Fbln5/Flot1/Tnfrsf11b/Adamtsl4/Col11a1/Ltbp4/Col5a1/Adamts10/Anxa2/Cav1/Hspg2/Sema5a/Smoc1/Ecm2/Col9a2/Gfod2/Col22a1/Smoc2/Sulf2/Col4a4/Fn1/Ccn2/Pdpn/Ext1/Ddr2/Antxr1/Mmp16/Myo1e/Adamts1/Col4a5/Tnfrsf1a/Tnr/Antxr2/Ddr1/Lamc1/Col16a1/Col5a3/Col8a1/Adamts5/Lcp1/Adamts20/Apbb2/Col5a2/Kif9/Lgals3/Matn4/Pbxip1/Tgfbr3/Ercc2/Axin2/Ets1/Mmp17
GO:0039529	RIG-I signaling pathway	21	0.773477	1.64052	0.00259159	0.0334966	0.028835	212	tags=14%, list=2%, signal=14%	Ddx60/Zc3hav1/Dhx58
GO:1903975	regulation of glial cell migration	23	0.760921	1.63367	0.00262647	0.0336225	0.0289434	962	tags=30%, list=7%, signal=28%	Fas/Bmerb1/Vim/Tiam1/Ntn1/Csf1/Trem2
GO:0031023	microtubule organizing center organization	127	0.572673	1.44481	0.00280399	0.0349747	0.0301074	3325	tags=43%, list=24%, signal=33%	Kif11/Brca1/Kifc1/Gen1/Ccnf/Ulk4/Wdr62/Stil/Ndc80/Rock2/D7Ertd443e/Cdk5rap2/Plk4/Chek1/Cdk2/Gadd45a/Slc16a1/Xpo1/Tuba1a/Brca2/Poc1a/Fbxw11/Poc1b/Haus4/Rttn/Cep135/Cenpj/Haus3/Mcph1/Kat2b/Spice1/Pclaf/Mdm1/Cep192/Sdccag8/Cep152/Arhgef10/Chmp2b/Pdcd6ip/Ccdc78/Fbxw5/Haus8/Nin/Rbm14/Uvrag/Haus6/Cep85/Nubp1/Ubxn2b/Clasp1/Crocc/Dzip1/Ctnnb1/Ppp1r35/Cetn4
GO:0098581	detection of external biotic stimulus	15	0.840208	1.67469	0.00291893	0.0359889	0.0309804	1750	tags=60%, list=13%, signal=53%	H2-Q4/Ssc5d/H2-Q7/H2-D1/Tlr4/Trem2/H2-K1/Nod1/Ly96
GO:0032815	negative regulation of natural killer cell activation	10	0.865774	1.60827	0.00297562	0.036436	0.0313653	1420	tags=70%, list=10%, signal=63%	Lgals9/H2-Q4/H2-Q7/H2-D1/H2-T22/H2-T23/H2-K1
GO:0019722	calcium-mediated signaling	127	0.572169	1.44354	0.00299217	0.0365013	0.0314216	1424	tags=22%, list=10%, signal=20%	Irgm1/Grm5/Slc8a1/Sgcd/Irgm2/Trpm4/Ptprj/Camkk2/Igtp/Nfatc2/Htr2c/Ptprc/Cdh13/Itpr1/Ccr5/Exoc4/Samd14/Lat2/Rcan2/Trem2/Plcg2/Atp2b4/Ptbp1/Pomc/Trat1/Car8/Ank2/Cmya5
GO:0030865	cortical cytoskeleton organization	48	0.680098	1.58728	0.00307608	0.0372401	0.0320575	2253	tags=40%, list=16%, signal=33%	Iqgap2/Ect2/Racgap1/Actn1/Rac3/Ehd2/Iqgap1/Iqgap3/Rock2/Synpo/Fmnl2/Plek/Llgl1/Wdr1/Rab13/Arf6/Ezr/Anln/Epb41l1
GO:0030500	regulation of bone mineralization	53	0.655578	1.5526	0.0030996	0.0374401	0.0322296	852	tags=23%, list=6%, signal=21%	Slc8a1/Isg15/Trpm4/Adgrv1/Ccn1/Tent5a/Ano6/Sgms2/Acvr1/Srgn/Ltbp3/Ddr2
GO:0034599	cellular response to oxidative stress	185	0.545778	1.39502	0.00327	0.0387978	0.0333984	3211	tags=30%, list=23%, signal=23%	Net1/Slc8a1/Met/Oxr1/Prr5l/Fos/Cyp1b1/Pcgf2/Fbln5/Foxp1/Ect2/Hspb1/Capn1/Aif1/Fancd2/Gsr/Pml/Slc25a24/Dapk1/Aldh3b1/Mt3/Ddr2/Pawr/Rhob/Sesn2/Ezh2/Stat6/Mgst1/Pnpt1/Jun/Stk25/Ncoa7/Prkcd/Foxo3/Foxo1/Trp53/Dhfr/Stx2/Trp53inp1/Rela/Hgf/Mgat3/Slc7a11/Stx4a/Zfp277/Abl1/Zc3h12a/Pex14/Fyn/Zfp580/Srxn1/Prkaa2/Map3k5/Atp7a/Pdgfra
GO:0006261	DNA-templated DNA replication	128	0.564108	1.42223	0.00326559	0.0387978	0.0333984	2696	tags=33%, list=19%, signal=27%	Cdc7/Timeless/Brca1/E2f7/Gen1/Bard1/Samhd1/Wdhd1/Blm/Pole/Mcm10/Pole2/Traip/Prim2/Polq/Mms22l/Rbbp8/Rtel1/Fam111a/Rfc2/Cdk2/Dna2/Tk1/Rad51/Lig1/Brca2/Ccne1/Dbf4/Rfc3/Rrm1/Cdc45/Mcm6/Topbp1/Ticrr/Zranb3/Pola1/Poln/Pcna/Mettl4/Recql/Gins4/Ccne2
GO:0051383	kinetochore organization	20	0.776935	1.63761	0.00326781	0.0387978	0.0333984	1600	tags=55%, list=11%, signal=49%	Cenph/Dlgap5/Cenpk/Kntc1/Ndc80/Cenpe/Cenpa/Nuf2/Cenpw/Smc4/Smc2
GO:0030198	extracellular matrix organization	211	0.53459	1.3696	0.00337191	0.0395214	0.0340213	1860	tags=29%, list=13%, signal=25%	Sulf1/Bcl3/Gfap/Adamtsl1/Aebp1/Col4a6/Cyp1b1/Ctss/Ccn1/Fbln5/Flot1/Tnfrsf11b/Adamtsl4/Col11a1/Ltbp4/Col5a1/Adamts10/Anxa2/Cav1/Hspg2/Sema5a/Smoc1/Ecm2/Col9a2/Gfod2/Col22a1/Smoc2/Sulf2/Col4a4/Fn1/Ccn2/Pdpn/Ext1/Ddr2/Antxr1/Mmp16/Myo1e/Adamts1/Col4a5/Tnfrsf1a/Tnr/Antxr2/Ddr1/Lamc1/Col16a1/Col5a3/Col8a1/Adamts5/Lcp1/Adamts20/Apbb2/Col5a2/Kif9/Lgals3/Matn4/Pbxip1/Tgfbr3/Ercc2/Axin2/Ets1/Mmp17
GO:0045229	external encapsulating structure organization	211	0.53459	1.3696	0.00337191	0.0395214	0.0340213	1860	tags=29%, list=13%, signal=25%	Sulf1/Bcl3/Gfap/Adamtsl1/Aebp1/Col4a6/Cyp1b1/Ctss/Ccn1/Fbln5/Flot1/Tnfrsf11b/Adamtsl4/Col11a1/Ltbp4/Col5a1/Adamts10/Anxa2/Cav1/Hspg2/Sema5a/Smoc1/Ecm2/Col9a2/Gfod2/Col22a1/Smoc2/Sulf2/Col4a4/Fn1/Ccn2/Pdpn/Ext1/Ddr2/Antxr1/Mmp16/Myo1e/Adamts1/Col4a5/Tnfrsf1a/Tnr/Antxr2/Ddr1/Lamc1/Col16a1/Col5a3/Col8a1/Adamts5/Lcp1/Adamts20/Apbb2/Col5a2/Kif9/Lgals3/Matn4/Pbxip1/Tgfbr3/Ercc2/Axin2/Ets1/Mmp17
GO:0071360	cellular response to exogenous dsRNA	11	0.848717	1.5977	0.00348424	0.0407078	0.0350426	502	tags=36%, list=4%, signal=35%	Ifih1/Zc3hav1/Flot1/Cav1
GO:0070213	protein auto-ADP-ribosylation	11	0.847296	1.59503	0.00372789	0.0423727	0.0364758	601	tags=36%, list=4%, signal=35%	Parp10/Parp3/Parp11/Parp12
GO:0051865	protein autoubiquitination	63	0.637316	1.54698	0.00404377	0.0452716	0.0389712	1294	tags=14%, list=9%, signal=13%	Trim30a/Uhrf1/Rnf213/Brca1/Dtx3l/Trim21/Rad18/Rnf19b/Trim68
GO:2000377	regulation of reactive oxygen species metabolic process	115	0.582892	1.46125	0.00422417	0.0463314	0.0398836	2331	tags=28%, list=17%, signal=23%	Trim30a/Nox4/Slc5a3/Cyp1b1/Ier3/Stat3/Fbln5/Brca1/Rab27a/Tspo/Tlr4/Tgfbr2/Hk2/Mt3/Cdkn1a/Birc3/Plcg2/Tyrobp/Itgam/Mapk14/Gadd45a/Pdk3/Tigar/Pdgfb/Pon3/Rhoa/Bcl2/Prkcd/Foxo3/Foxo1/Trp53/Dhfr
GO:0007169	transmembrane receptor protein tyrosine kinase signaling pathway	445	0.482707	1.25648	0.00427583	0.0466938	0.0401955	2921	tags=29%, list=21%, signal=23%	Sulf1/Socs3/Plce1/Tmem108/Alk/Slc39a14/Met/Sorbs1/Col4a6/Arid5b/Afap1l2/Ptprj/Ephb2/Esr1/Shc4/Angpt1/Stat3/Igfbp3/Itga1/Rhbdf1/Hap1/Socs1/Hspb1/Ror1/Nrg2/Irs2/Prkca/Igfbp2/Tns2/Tiam1/Shcbp1/Cdh13/Frk/Plat/Pik3cd/Fgf18/Smoc2/Sulf2/Anks1b/Bcar1/Ccn2/Iqgap1/Blnk/Mt3/Csf1/Ift88/Ext1/Ddr2/Irs1/Shkbp1/Myo1e/Samd12/Fstl4/Myo1c/Col4a5/Cnmd/Nck2/Ston1/Stat5a/Ddr1/Samd10/Ptprf/Bmp5/Myof/Mapk14/Ptpn12/Rapge…
GO:0042060	wound healing	215	0.528246	1.35544	0.00438082	0.0476459	0.0410152	1836	tags=24%, list=13%, signal=21%	Cd44/Timp1/C1qtnf1/Il6ra/Dysf/Serping1/Tmeff2/Hmox1/Ptprj/Ephb2/Ccn1/Dst/Flna/Pros1/Pla2g4a/Ano6/Prkca/Tnfrsf12a/Col5a1/Cd109/Anxa2/Cav1/Ahnak/Plat/Gpx1/Smoc2/Fn1/Prkg1/Mrtfa/Rab27a/Tlr4/Pdpn/Ext1/Cdkn1a/Ddr2/Elk3/Scrib/Fcer1g/Tec/Ddr1/S100a10/Myof/Srsf6/Fgf2/Myh9/Erbb2/Plek/Myh10/Casp7/Pdgfb/Pik3cb/F8
GO:0060142	regulation of syncytium formation by plasma membrane fusion	19	0.785744	1.64642	0.00443441	0.0480334	0.0413487	1245	tags=47%, list=9%, signal=43%	Cxcl10/Stat1/Flot1/Nfatc2/Ehd2/Trem2/Flt3l/Tyrobp/Mapk14
GO:0014812	muscle cell migration	101	0.592883	1.47246	0.00449385	0.048481	0.041734	1865	tags=32%, list=13%, signal=28%	Nox4/Net1/Met/Rapgef4/Cyp1b1/S100a11/Igfbp3/Lpar1/Cav1/Aif1/Pde4d/Plat/Sema6d/Prkg1/Tlr4/Parva/Iqgap1/Ddr2/Bin3/Dock5/Adamts1/Itga4/Trib1/Ddr1/Dock7/Myh9/Camk2d/Abhd2/Arpc5/Pdgfb/Rhoa/Bcl2
GO:0061762	CAMKK-AMPK signaling cascade	10	0.851913	1.58253	0.00464783	0.0498408	0.0429046	962	tags=50%, list=7%, signal=47%	Irgm1/Irgm2/Camkk2/Igtp/Trem2
GO:0008203	cholesterol metabolic process	96	-0.558315	-2.01616	1.08e-05	0.000510865	0.00043977	1872	tags=45%, list=13%, signal=39%	Abca2/Soat1/Por/Sec14l2/Fdxr/Lipe/Fgf1/Dgat2/Cyp46a1/Lpcat3/Hsd17b7/Pmvk/Cln6/Srebf2/Disp3/Acadl/Lmf1/Npc1/Hmgcs2/Apoe/Aplp2/Fdps/Sqle/Tm7sf2/Sc5d/Idi1/Nsdhl/Hmgcr/Mvk/Msmo1/Hmgcs1/Ldlr/Sod1/Stard4/Fdft1/Dhcr7/Dhcr24/Cyp51/Abca5/Vldlr/Lss/Insig1/Mvd

## Sheet: Aged_Tumor_Astro_gseGO_BP_REVIG
ID	Description	setSize	enrichmentScore	NES	pvalue	p.adjust	qvalue	rank	leading_edge	core_enrichment
GO:0051607	defense response to virus	195	0.577151	2.54119	2.52e-19	1.34e-15	1.14e-15	1354	tags=29%, list=10%, signal=27%	Ifitm3/Irf7/Ddx60/Ifit1/Bst2/Oasl2/Irgm1/Trim30a/Rsad2/Oas2/Oas1a/Ifit3/Ifit3b/Slfn8/Ifi204/Gbp5/Mndal/Stat2/Slfn9/Trim30d/Dhx58/Trim34a/Irgm2/Parp9/Gbp7/Mlkl/Oasl1/Stat1/Igtp/Trim25/Ifih1/Eif2ak2/Pml/Trim21/Ptprc/Shfl/Zc3hav1/Mov10/Ifit2/Ifitm2/Casp1/Znfx1/Dtx3l/Unc93b1/Trim12a/Ticam1/Hsp90aa1/Apobec1/Samhd1/Map3k14/Apobec3/Vamp8/Ifitm7/Trim5/Aim2/Selenok/Rnf135
GO:0035456	response to interferon-beta	40	0.872906	2.97064	7.07e-17	1.87e-13	1.6e-13	829	tags=57%, list=6%, signal=54%	Ifitm3/Ifit1/Bst2/Irgm1/Iigp1/F830016B08Rik/Oas1a/Ifit3/Ifi204/Gbp3/Xaf1/Mndal/Gbp2/Gbp6/Irgm2/Ndufa13/Gbp7/Stat1/Igtp/Camk2a/Shfl/Gm4841/Ifitm2
GO:0034341	response to type II interferon	86	0.689061	2.70318	1.12e-14	1.49e-11	1.27e-11	1294	tags=41%, list=9%, signal=37%	Ifitm3/Bst2/Nlrc5/Vim/Irgm1/Gapdh/Gbp3/Gbp5/Sp100/Gbp2/Gbp6/Parp14/Gbp9/Irgm2/Parp9/Gbp8/Gbp7/H2-Q7/Stat1/Igtp/Actg1/Trim21/Camk2a/Shfl/Tlr4/Ifitm2/Casp1/Stxbp2/Zyx/Dapk3/Cd74/Vamp8/Irf8/Calm1/Ifitm7
GO:0048525	negative regulation of viral process	78	0.703486	2.69185	2.42e-14	2.57e-11	2.19e-11	1297	tags=41%, list=9%, signal=37%	Ifitm3/Bst2/Oasl2/Trim30a/Rsad2/Oas2/Oas1a/Hmga2/Ifi204/Sp100/Mndal/Trim30d/Ppia/Oasl1/Stat1/Trim25/Ifih1/Trim14/Eif2ak2/Trim21/Zfp36/Shfl/Fam111a/Zc3hav1/Ly6e/Ifitm2/Znfx1/Trim12a/Cd74/Apobec3/Ifitm7/Trim5
GO:0042742	defense response to bacterium	114	0.626856	2.55973	5.85e-14	5.17e-11	4.42e-11	1288	tags=42%, list=9%, signal=39%	Irgm1/Iigp1/Oas2/Oas1a/Fau/Bcl3/Gbp3/Gbp5/Ighm/Gbp2/Gbp6/Anxa3/Lgals9/Stab1/H2-Q4/B2m/Romo1/Rnf213/Gbp9/Irgm2/Gbp8/Gbp7/Casp4/H2-Q7/H2-T22/Igtp/Cebpb/Ssc5d/H2-D1/Fcer1g/H2-T23/Trf/Lpo/Rarres2/Tusc2/Rnf31/Tlr4/Pglyrp1/Casp1/Znfx1/Tnfrsf1a/Cyba/H2-K1/Hmgb2/Trem2/Nfkbiz/Irf8/Grn
GO:0001906	cell killing	78	0.695429	2.66103	8.35e-14	6.32e-11	5.4e-11	1019	tags=44%, list=7%, signal=41%	Gapdh/Ccr5/Gbp3/Gbp5/Gbp2/Lgals9/Clec2d/H2-Q4/B2m/Romo1/Arrb2/Irgm2/Gbp7/Tap1/H2-Q7/H2-T22/Igtp/Tyrobp/Tap2/Lgals3/Pomc/Mill2/Hmgn2/Itgam/Ptprc/Ctsc/H2-D1/H2-T23/Hsp90ab1/Rnf19b/Tusc2/Pglyrp1/H2-K1/Stxbp2
GO:0050792	regulation of viral process	134	0.586124	2.48082	2.48e-13	1.46e-10	1.25e-10	971	tags=25%, list=7%, signal=24%	Ifitm3/Bst2/Oasl2/Trim30a/Rsad2/Oas2/Oas1a/Hmga2/Ifi204/Sp100/Mndal/Pfn1/Trim30d/Trim34a/Top2a/Ppia/Oasl1/Stat1/Trim25/Ifih1/Trim14/Eif2ak2/Lgals1/Trim21/Mdfic/Zfp36/Shfl/Fam111a/Zc3hav1/Ly6e/Ifitm2/Znfx1/Kpna2/Trim12a
GO:0006119	oxidative phosphorylation	101	0.637245	2.5505	4.29e-13	2.07e-10	1.77e-10	1498	tags=47%, list=11%, signal=42%	Cox5b/Cox6a1/Uqcr11/Uqcrq/Ndufa1/Cox8a/Chchd10/Uqcc2/Ndufc1/Cox4i1/Ndufa13/Uqcrb/Ndufa2/Uqcrfs1/Ndufc2/Ndufs6/Ndufa3/Ndufb9/Cycs/Pde2a/Ndufs8/Cox7c/Ndufb11/Uqcr10/Chchd2/Ndufa11/Ndufb7/Park7/Ccnb1/Nupr1/Ndufb8/Ndufb6/Cox7a2/Ndufa5/Ndufa7/Iscu/Ndufa6/Cox7a2l/Ndufv1/Gadd45gip1/Ndufs2/Ndufa8/Uqcc3/Uqcrh/Rhoa/Ndufb4/Coq7
GO:0002443	leukocyte mediated immunity	195	0.499322	2.19851	9.85e-13	4.01e-10	3.43e-10	1208	tags=28%, list=9%, signal=26%	Irf7/Bst2/Rsad2/Il1r1/Csf3r/Hmox1/Bcl3/Fas/Ighm/Anxa3/Lgals9/Fosl2/Clec2d/Serping1/H2-Q4/B2m/Arrb2/C4b/C1qb/Tcirg1/Icam1/Tap1/H2-Q7/H2-T22/Inpp5d/Tyrobp/Tap2/Pomc/Mill2/Parp3/C1qc/Itgam/Ptprc/Ctsc/H2-D1/Fcer1g/H2-T23/Wdr1/Rnf19b/Clcf1/Tusc2/Arid5a/Tlr4/C1ra/C1qa/Unc93b1/Ticam1/H2-K1/Stxbp2/Exo1/Trem2/Cd74/Nfkbiz/Vamp8
GO:0045089	positive regulation of innate immune response	236	0.459456	2.0672	2.31e-12	8.74e-10	7.47e-10	1141	tags=22%, list=8%, signal=21%	Irf7/Ddx60/Nlrc5/Irgm1/Trim30a/Rsad2/Oas1a/Ifi35/Ifi204/Gbp3/Gbp5/Mndal/Gbp2/Lgals9/Trim30d/H2-Q4/Dhx58/Arrb2/Pik3ap1/Irgm2/Parp9/Gbp7/Cav1/Casp4/Oasl1/H2-Q7/H2-T22/Rbm47/Igtp/Cd274/Tyrobp/Trim25/Ifih1/Eif2ak2/Hspa8/H2-D1/H2-T23/Arf6/Zc3hav1/Tlr4/Casp1/Znfx1/Unc93b1/Cyba/Trim12a/Ticam1/Esr1/H2-K1/Nop53/Hsp90aa1/Hmgb2/Trem2/Cd74
GO:0071346	cellular response to type II interferon	74	0.651022	2.46529	9.36e-11	3.1e-08	2.65e-08	1264	tags=36%, list=9%, signal=33%	Nlrc5/Vim/Irgm1/Gapdh/Gbp3/Gbp5/Gbp2/Gbp6/Parp14/Gbp9/Irgm2/Parp9/Gbp8/Gbp7/H2-Q7/Stat1/Igtp/Actg1/Camk2a/Tlr4/Casp1/Stxbp2/Zyx/Dapk3/Vamp8/Irf8/Calm1
GO:0006959	humoral immune response	67	0.663971	2.44458	2.55e-10	7.51e-08	6.42e-08	1128	tags=42%, list=8%, signal=39%	A2m/Gapdh/Fau/Bcl3/Ighm/Serping1/H2-Q4/B2m/Romo1/C4b/C1qb/H2-Q7/H2-T22/Lgals3/Pomc/Hmgn2/C1qc/Ptprc/H2-D1/H2-T23/Trf/Rarres2/Pglyrp1/C1ra/C1qa/H2-K1/Exo1/Trem2
GO:0052547	regulation of peptidase activity	198	0.467138	2.07938	4.21e-10	8.91e-08	7.62e-08	1333	tags=27%, list=10%, signal=25%	A2m/Gpx1/Cd44/Gapdh/Serpina3n/Pcsk1n/Psmb8/Fas/Ifi204/Ccn1/Mndal/Casp8/Cryab/Serping1/Ndufa13/Cav1/Cstb/Timp1/Stat1/Pebp1/Psmb9/Cycs/Rack1/Pml/Cd109/Uaca/Ctss/Birc5/Psme2/Cst3/Fis1/Park7/Bin1/Cast/Ints1/Anp32b/Stat3/Mbp/Casp1/Psme1/Prelid1/Nek5/Ubxn1/Wnt9a/Bok/Col7a1/Mgmt/Cdkn2d/Pih1d1/Grn/Ctsh/Aim2/Lyn
GO:0140888	interferon-mediated signaling pathway	59	0.688752	2.52005	6.91e-10	1.38e-07	1.18e-07	411	tags=24%, list=3%, signal=23%	Ifitm3/Irf7/Nlrc5/Irgm1/Oas2/Oas1a/Stat2/Parp14/Irgm2/Parp9/Rbm47/Stat1/Igtp/Ifih1
GO:0019058	viral life cycle	185	0.455281	1.9918	1.93e-09	3.41e-07	2.91e-07	1310	tags=24%, list=9%, signal=22%	Ifitm3/Bst2/Oasl2/Trim30a/Rsad2/Oas2/Oas1a/Hmga2/Ifi204/Mndal/Trim30d/Trim34a/Top2a/Ppia/Cav1/Icam1/Oasl1/Chmp2a/Trim25/Jpt2/Ifih1/Spcs1/Eif2ak2/Hspa8/Lgals1/Trim21/Eef1a1/Shfl/Fam111a/Zc3hav1/Ly6e/Ifitm2/Znfx1/Kpna2/Trim12a/Cd74/Pcbp1/Apobec3/Vamp8/Cav2/Ifitm7/Trim5/Chmp6/Ctsb
GO:0002250	adaptive immune response	210	0.433913	1.95515	2.91e-09	4.4e-07	3.76e-07	1141	tags=24%, list=8%, signal=22%	Irf7/Cd44/Rsad2/Il1r1/Csf3r/Bcl3/Fas/Ighm/Fosl2/Serping1/H2-Q4/Il6ra/B2m/Pik3cd/Mif/C4b/C1qb/Tcirg1/Icam1/Tap1/H2-Q7/H2-T22/Inpp5d/Cd274/Ephb2/Tap2/Mill2/Parp3/C1qc/Ptprc/Ctsc/Cd247/H2-D1/Fcer1g/H2-T23/Gadd45g/Rnf19b/Clcf1/Hras/Arid5a/Stat3/C1ra/C1qa/Unc93b1/H2-K1/Exo1/Relb/Nfkb2/Trem2/Cd74
GO:0016032	viral process	255	0.407228	1.89972	3.07e-09	4.51e-07	3.86e-07	1310	tags=22%, list=9%, signal=20%	Ifitm3/Bst2/Oasl2/Trim30a/Rsad2/Oas2/Oas1a/Hmga2/Ifi204/Sp100/Mndal/Cfl1/Pfn1/Trim30d/Trim34a/Top2a/Ppia/Cav1/Icam1/Oasl1/Stat1/Eif3f/Chmp2a/Trim25/Jpt2/Ifih1/Trim14/Spcs1/Eif2ak2/Hspa8/Lgals1/Trim21/Mdfic/Eef1a1/Zfp36/Jun/Shfl/Fam111a/Zc3hav1/Ly6e/Ifitm2/Znfx1/Kpna2/Trim12a/Eif3g/Cd74/Pcbp1/Apobec3/Vamp8/Cav2/Eif3d/Ifitm7/Trim5/Chmp6/Ctsb
GO:0002526	acute inflammatory response	44	0.732447	2.54746	4.57e-09	6.05e-07	5.17e-07	1017	tags=39%, list=7%, signal=36%	Serpina3n/Ccr5/Fn1/H2-Q4/Icam1/H2-Q7/H2-T22/Ano6/Gstp1/H2-D1/Fcer1g/H2-T23/Park7/Nupr1/Stat3/Ptges/H2-K1
GO:0032680	regulation of tumor necrosis factor production	112	0.535918	2.14893	5.31e-09	6.86e-07	5.86e-07	1224	tags=33%, list=9%, signal=30%	Ccr5/Trim30a/Akap12/Oas2/Oas1a/Bcl3/Ccn1/Tspo/Lgals9/H2-Q4/Arrb2/Mif/H2-Q7/H2-T22/Ephb2/Hspb1/Tyrobp/Pomc/Ifih1/Gstp1/Ptprc/H2-D1/Ptprj/Fcer1g/H2-T23/Zfp36/Gpnmb/Arid5a/Tlr4/Stat3/Tnfrsf1a/Cyba/Ticam1/H2-K1/Trem2/C1qtnf4/Angpt1
GO:0032640	tumor necrosis factor production	117	0.529107	2.17952	6.28e-09	7.92e-07	6.77e-07	1224	tags=32%, list=9%, signal=29%	Ccr5/Trim30a/Akap12/Oas2/Oas1a/Bcl3/Ccn1/Tspo/Lgals9/H2-Q4/Arrb2/Mif/H2-Q7/H2-T22/Ephb2/Hspb1/Tyrobp/Pomc/Ifih1/Gstp1/Ptprc/H2-D1/Ptprj/Fcer1g/H2-T23/Zfp36/Gpnmb/Arid5a/Tlr4/Stat3/Tnfrsf1a/Cyba/Ticam1/H2-K1/Trem2/C1qtnf4/Angpt1
GO:0031640	killing of cells of another organism	21	0.856378	2.44755	3.6e-08	3.81e-06	3.26e-06	828	tags=62%, list=6%, signal=58%	Gapdh/Gbp3/Gbp5/Gbp2/Romo1/Irgm2/Gbp7/Igtp/Lgals3/Pomc/Hmgn2/Tusc2/Pglyrp1
GO:0141060	disruption of anatomical structure in another organism	23	0.837452	2.53725	4.18e-08	4.18e-06	3.57e-06	828	tags=57%, list=6%, signal=53%	Gapdh/Gbp3/Gbp5/Gbp2/Romo1/Irgm2/Gbp7/Igtp/Lgals3/Pomc/Hmgn2/Tusc2/Pglyrp1
GO:0015986	proton motive force-driven ATP synthesis	43	0.713428	2.4926	4.48e-08	4.24e-06	3.63e-06	1449	tags=49%, list=10%, signal=44%	Ndufa1/Ndufc1/Ndufa13/Ndufa2/Ndufc2/Ndufs6/Ndufa3/Ndufb9/Ndufs8/Ndufb11/Ndufa11/Ndufb7/Ndufb8/Ndufb6/Ndufa5/Ndufa7/Ndufa6/Ndufv1/Ndufs2/Ndufa8/Ndufb4
GO:0001562	response to protozoan	17	0.884149	2.47813	6.09e-08	5.46e-06	4.67e-06	746	tags=71%, list=5%, signal=67%	Iigp1/Bcl3/Gbp3/Gbp2/Gbp6/Gbp9/Irgm2/Gbp8/Gbp7/Igtp/Ier3/Hras
GO:0042832	defense response to protozoan	16	0.880449	2.43893	6.9e-08	5.92e-06	5.06e-06	746	tags=69%, list=5%, signal=65%	Iigp1/Bcl3/Gbp3/Gbp2/Gbp6/Gbp9/Irgm2/Gbp8/Gbp7/Igtp/Hras
GO:0002460	adaptive immune response based on somatic recombination of immune receptors built from immunoglobulin superfamily domains	165	0.453725	1.97738	7.3e-08	5.95e-06	5.08e-06	1141	tags=27%, list=8%, signal=25%	Irf7/Rsad2/Il1r1/Csf3r/Bcl3/Fas/Ighm/Fosl2/Serping1/H2-Q4/Il6ra/B2m/C4b/C1qb/Tcirg1/Icam1/H2-Q7/H2-T22/Inpp5d/Cd274/Ephb2/Tap2/Mill2/Parp3/C1qc/Ptprc/Ctsc/H2-D1/Fcer1g/H2-T23/Gadd45g/Clcf1/Hras/Arid5a/Stat3/C1ra/C1qa/Unc93b1/H2-K1/Exo1/Relb/Nfkb2/Trem2/Cd74
GO:0071216	cellular response to biotic stimulus	143	0.464177	1.99489	8.26e-08	6.63e-06	5.67e-06	1333	tags=27%, list=10%, signal=24%	Vim/Irgm1/Plscr2/Sbno2/Trim30a/Gbp3/Gbp5/Gbp2/Gbp6/Trim30d/Ly86/B2m/Irgm2/Mif/Stat1/Igtp/Cebpb/Cmpk2/Cd274/Pde2a/Trib1/Gstp1/Zfp36/Cd180/Git1/Prdx2/Arid5a/Tlr4/Mapk3/Casp1/Trim12a/Ticam1/Trem2/Nfkbiz/Irf8/Trim5/Ddit3/Lyn
GO:0031341	regulation of cell killing	41	0.708873	2.44517	1.36e-07	1.02e-05	8.7e-06	696	tags=44%, list=5%, signal=42%	Ccr5/Lgals9/Clec2d/H2-Q4/B2m/Arrb2/Tap1/H2-Q7/H2-T22/Tyrobp/Tap2/Pomc/Mill2/Itgam/Ptprc/H2-D1/H2-T23/Hsp90ab1
GO:0001910	regulation of leukocyte mediated cytotoxicity	36	0.725869	2.47295	1.51e-07	1.11e-05	9.47e-06	619	tags=44%, list=4%, signal=43%	Lgals9/Clec2d/H2-Q4/B2m/Arrb2/Tap1/H2-Q7/H2-T22/Tyrobp/Tap2/Pomc/Mill2/Itgam/Ptprc/H2-D1/H2-T23
GO:0035455	response to interferon-alpha	20	0.843404	2.38353	1.73e-07	1.24e-05	1.06e-05	829	tags=40%, list=6%, signal=38%	Ifitm3/Ifit1/Bst2/Oas1a/Ifi204/Eif2ak2/Ifit2/Ifitm2
GO:0044403	biological process involved in symbiotic interaction	170	0.42839	1.86997	2.74e-07	1.84e-05	1.57e-05	829	tags=18%, list=6%, signal=17%	Ifitm3/Gpx1/Gapdh/Trim30a/Hmga2/Gbp3/Fn1/Cfl1/Gbp2/Gbp6/Trim30d/Romo1/Trim34a/Gbp9/Gbp7/Cav1/Icam1/Chmp2a/Trim25/Pomc/Jpt2/Hspa8/Lgals1/Trim21/Eef1a1/Jun/Tusc2/Ly6e/Pglyrp1/Ifitm2
GO:0034340	response to type I interferon	51	0.638468	2.24964	3.08e-07	1.96e-05	1.68e-05	829	tags=24%, list=6%, signal=22%	Ifitm3/Irf7/Nlrc5/Oas2/Oas1a/Sp100/Stat2/Rbm47/Stat1/Ifih1/Shfl/Ifitm2
GO:0046651	lymphocyte proliferation	173	0.42259	1.84332	4.24e-07	2.61e-05	2.23e-05	1501	tags=27%, list=11%, signal=25%	Cd44/Irgm1/Ighm/Lgals9/Fosl2/H2-Q4/Aif1/Igfbp2/Mif/Msn/Cdkn1a/Carmil2/H2-Q7/H2-T22/Inpp5d/Psmb10/Cebpb/Cd274/Ephb2/Irs2/Tyrobp/Lgals3/Itgam/Ptprc/H2-D1/H2-T23/Cd180/Gpnmb/Clcf1/Dock2/Prdx2/Tlr4/Znhit1/Ticam1/H2-K1/Cd74/Nfkbiz/Tgfbr2/Slc4a2/Lyn/Selenok/Fkbp1a/Cxcl12/Slc7a1/Laptm5/Nfatc2/Shb
GO:0002437	inflammatory response to antigenic stimulus	30	0.750923	2.38253	6.87e-07	3.95e-05	3.38e-05	1128	tags=47%, list=8%, signal=43%	Gpx1/Fosl2/H2-Q4/Icam1/H2-Q7/H2-T22/H2-D1/Fcer1g/H2-T23/Park7/Psmb4/H2-K1/Hmgb2/Trem2
GO:0072593	reactive oxygen species metabolic process	164	0.418851	1.81715	9.14e-07	5.04e-05	4.31e-05	976	tags=21%, list=7%, signal=20%	Gpx1/Nox4/Mt3/Trim30a/Slc5a3/Ccn1/Tspo/Cryab/Romo1/Ndufa13/Cdkn1a/Gadd45a/Prdx5/Met/Ier3/Ndufc2/Tyrobp/Sesn2/Cycs/Hk2/Eif5a/Gstp1/Itgam/Pdgfb/Brca1/Birc3/Tusc2/Prdx2/Park7/Fbln5/Tlr4/Stat3/Txn1/Cyba/Cyp1b1
GO:0060337	type I interferon-mediated signaling pathway	46	0.638601	2.25586	1.61e-06	8.26e-05	7.06e-05	411	tags=20%, list=3%, signal=19%	Ifitm3/Irf7/Nlrc5/Oas2/Oas1a/Stat2/Rbm47/Stat1/Ifih1
GO:0032753	positive regulation of interleukin-4 production	16	0.839648	2.32591	2.16e-06	0.000107791	9.21e-05	1017	tags=50%, list=7%, signal=46%	H2-Q4/H2-Q7/H2-T22/Cebpb/H2-D1/Fcer1g/H2-T23/H2-K1
GO:0002428	antigen processing and presentation of peptide antigen via MHC class Ib	11	0.908799	2.19856	3.19e-06	0.000153561	0.000131274	1017	tags=82%, list=7%, signal=76%	H2-Q4/B2m/H2-Q7/H2-T22/Tap2/Mill2/H2-D1/H2-T23/H2-K1
GO:0002440	production of molecular mediator of immune response	154	0.415663	1.77917	3.85e-06	0.00018022	0.000154064	1224	tags=22%, list=9%, signal=20%	Bst2/Rsad2/Il1r1/Hmox1/Fas/Ighm/Fosl2/H2-Q4/B2m/Mif/Tcirg1/Casp4/H2-Q7/H2-T22/Ephb2/Parp3/Ptprc/H2-D1/Fcer1g/H2-T23/Clcf1/Arid5a/Tlr4/Sema7a/Casp1/Polq/Tgfb3/Ticam1/H2-K1/Exo1/Samhd1/Cd74/Nfkbiz/Angpt1
GO:0002861	regulation of inflammatory response to antigenic stimulus	20	0.803252	2.27006	4.13e-06	0.000188472	0.000161118	1128	tags=55%, list=8%, signal=51%	Gpx1/H2-Q4/H2-Q7/H2-T22/H2-D1/Fcer1g/H2-T23/Park7/Psmb4/H2-K1/Trem2
GO:0007416	synapse assembly	200	-0.517463	-1.67012	5.39e-06	0.000237907	0.000203379	3725	tags=44%, list=27%, signal=33%	Ube2v2/Pdlim5/Bhlhb9/Lzts3/Kirrel3/Robo1/Abi3bp/Lrrc4/Elavl2/Ntng2/Slitrk2/Cdh9/Nrxn3/Mdga2/Syndig1/Epha7/Farp1/Vps35/Nrxn2/Slitrk4/Lrp4/Slit2/Gria1/Mycbp2/Gsk3b/Pcdh17/Flrt2/Gabra1/Plxnb1/Gabra5/Gabrg2/Lgi2/Ptpn13/Lrrc4b/Lrtm1/Large1/Mecp2/Stau2/Pten/Dnm3/Setd5/Nrxn1/Dlg5/Mef2c/Chd4/Numb/Erbb4/Efnb1/Slitrk3/Gpm6a/Wnt7a/Magi2/Ntrk3/Gabra2/Grid2/Slc25a46/Ogt/Mapt/Ephb3/Adgrl2/Gabra4/Pik3r1/Ppp1r9a…
GO:0051701	biological process involved in interaction with host	101	0.483737	1.9361	5.45e-06	0.000238443	0.000203837	1310	tags=27%, list=9%, signal=24%	Ifitm3/Trim30a/Gbp3/Gbp2/Gbp6/Trim30d/Trim34a/Gbp9/Gbp7/Cav1/Icam1/Chmp2a/Trim25/Jpt2/Lgals1/Trim21/Ly6e/Pglyrp1/Ifitm2/Trim12a/Cd74/Vamp8/Cav2/Ifitm7/Trim5/Chmp6/Ctsb
GO:0032673	regulation of interleukin-4 production	20	0.796329	2.25049	5.59e-06	0.000240869	0.00020591	1317	tags=45%, list=9%, signal=41%	H2-Q4/H2-Q7/H2-T22/Cebpb/H2-D1/Fcer1g/H2-T23/H2-K1/Ddit3
GO:0060759	regulation of response to cytokine stimulus	106	0.47135	1.89118	5.58e-06	0.000240869	0.00020591	1224	tags=24%, list=9%, signal=22%	Irf7/Nlrc5/Irgm1/Oas1a/Il1r1/Stat2/Parp14/Tle5/Irgm2/Parp9/Cav1/Casp4/Rbm47/Igtp/Tnfrsf11b/Ifih1/Ptprc/Tlr4/Casp1/Tnfrsf1a/Trem2/Samhd1/Cd74/C1qtnf4/Angpt1
GO:0002673	regulation of acute inflammatory response	25	0.746178	2.33429	7.26e-06	0.000304177	0.000260031	1017	tags=44%, list=7%, signal=41%	Ccr5/H2-Q4/H2-Q7/H2-T22/Gstp1/H2-D1/Fcer1g/H2-T23/Park7/Ptges/H2-K1
GO:0000070	mitotic sister chromatid segregation	152	0.406559	1.72529	7.59e-06	0.000313793	0.000268251	988	tags=26%, list=7%, signal=24%	Tpx2/Flna/Uhrf1/Ncapg/Chmp2a/Spc25/Cenpe/Cdca8/Prc1/Anapc15/Knstrn/Kntc1/Cenpi/Racgap1/Nuf2/Ska3/Ndc80/Incenp/Birc5/Kif23/Kif18a/Knl1/Chek2/Kif11/Ran/Spc24/Kifc1/Kif14/Tubg2/Ccnb1/Kifc2/Mad2l1/Nudc/Nusap1/Snhg15/Psrc1/Espl1/Ttk/Cenpk
GO:0070269	pyroptosis	20	0.788391	2.22806	7.99e-06	0.000325375	0.000278152	1433	tags=50%, list=10%, signal=45%	Gbp3/Gbp5/Gbp2/Casp8/Casp4/Trim21/Casp1/Trem2/Aim2/Dpp9
GO:0071174	mitotic spindle checkpoint signaling	37	0.654259	2.23423	8.22e-06	0.000327934	0.00028034	1161	tags=43%, list=8%, signal=40%	Spc25/Cenpe/Cdca8/Anapc15/Kntc1/Nuf2/Ndc80/Incenp/Birc5/Knl1/Stil/Spc24/Ccnb1/Mad2l1/Ttk/Zwilch
GO:0052372	modulation by symbiont of entry into host	41	0.640092	2.20792	9.2e-06	0.000361041	0.000308641	1297	tags=34%, list=9%, signal=31%	Ifitm3/Trim30a/Trim30d/Trim34a/Cav1/Trim25/Lgals1/Trim21/Ly6e/Ifitm2/Trim12a/Cd74/Ifitm7/Trim5
GO:0002438	acute inflammatory response to antigenic stimulus	17	0.820255	2.29904	1.14e-05	0.00044407	0.00037962	1017	tags=53%, list=7%, signal=49%	H2-Q4/Icam1/H2-Q7/H2-T22/H2-D1/Fcer1g/H2-T23/Park7/H2-K1
GO:0007389	pattern specification process	266	-0.482454	-1.58282	1.54e-05	0.000577993	0.000494106	3748	tags=39%, list=27%, signal=29%	Hif1a/Sox1/Bmpr2/Cep290/Robo1/Bmp7/Ift140/Fuz/Psen2/Adgrg1/Fgfr2/Sufu/Frs2/Smad2/Mdga2/Meis1/Prkdc/Ssbp3/Bmpr1a/Dchs1/Bptf/Tra2b/Rnf111/Gja1/Lrp4/Ldb1/Atm/Meis2/Kdm2a/Zic1/Pcsk5/Ppp2r3a/Disp1/Intu/Pax6/Kif3a/Yy1/Tshz1/Med12/Arl13b/Hipk2/Dzip1l/Plxna2/Dync2h1/Eya1/Nckap1/Ep300/Tdrd5/Tasor/Smad6/Ift57/Notch2/Zic3/Smo/Abi1/Ttn/Nphp3/Tbc1d32/Asph/Mef2c/Lrp6/Fgf1/Erbb4/Ttc21b/Efnb1/Sf3b1/Dop1b/Tcf7l1/…
GO:0033108	mitochondrial respiratory chain complex assembly	84	0.485993	1.87439	2.12e-05	0.000773284	0.000661054	1846	tags=38%, list=13%, signal=33%	Ndufa1/Uqcc2/Ndufc1/Ndufa13/Taco1/Ndufa2/Ndufc2/Ndufs6/Ndufa3/Ndufb9/Coa3/Ndufs8/Ndufb11/Ndufa11/Ndufb7/Ndufb8/Ndufb6/Ndufa5/Cox17/Ndufa6/Ndufs2/Cox14/Ndufa8/Uqcc3/Pet100/Ndufb4/Ndufaf8/Sdhaf4/Dmac1/Ndufb10/Sdhaf1/Ndufb5
GO:0032602	chemokine production	53	0.58024	2.06422	2.41e-05	0.000856604	0.000732281	1593	tags=40%, list=11%, signal=35%	Oas1a/Ccn1/Lgals9/Fosl2/Il6ra/Aif1/Apod/Mif/Eif2ak2/Gstp1/Tusc2/Tlr4/Mbp/Ticam1/Trem2/Cd74/Nfkbiz/Selenok/Cxcl5/Hc/Csf1r
GO:2000377	regulation of reactive oxygen species metabolic process	115	0.422585	1.71658	2.4e-05	0.000856604	0.000732281	976	tags=23%, list=7%, signal=22%	Nox4/Mt3/Trim30a/Slc5a3/Tspo/Cryab/Romo1/Cdkn1a/Gadd45a/Ier3/Ndufc2/Tyrobp/Hk2/Eif5a/Gstp1/Itgam/Pdgfb/Brca1/Birc3/Tusc2/Prdx2/Park7/Fbln5/Tlr4/Stat3/Cyba/Cyp1b1
GO:0019882	antigen processing and presentation	62	0.534454	1.95618	2.74e-05	0.000937902	0.00080178	1141	tags=37%, list=8%, signal=34%	Psmb8/Ighm/H2-Q4/B2m/Icam1/Tap1/H2-Q7/H2-T22/Tap2/Psmb9/Mill2/Ctss/H2-D1/Fcer1g/H2-T23/Psme2/Psme1/Tapbp/Unc93b1/H2-K1/Relb/Trem2/Cd74
GO:0045765	regulation of angiogenesis	185	0.367947	1.60972	3e-05	0.00101858	0.000870753	1316	tags=23%, list=9%, signal=21%	Adam12/Sulf1/S100a1/Hmox1/Lif/Hmga2/Hspb6/Rhoj/Sp100/Anxa3/Stab1/Pik3cd/Runx1/Gadd45a/Adamts1/Itga5/Stat1/Tnfrsf12a/Sparc/Hspb1/Lgals3/Epn1/Hk2/Pml/Rras/Brca1/Fbln5/Stat3/Fgf2/Sirt6/Thbs2/Tnfrsf1a/Cyp1b1/Rhob/Pgk1/Plk2/Mdk/Ets1/Ppp1r15a/Tjp1/Grn/Ctsh/Tgfbr2
GO:0042060	wound healing	215	0.350688	1.57094	3.79e-05	0.00123199	0.00105319	1121	tags=20%, list=8%, signal=19%	Gpx1/Cd44/S100a10/Hmox1/Ccn1/Fn1/Flna/Serping1/Il6ra/Ppia/Cav1/Timp1/Cdkn1a/Carmil2/Tnfrsf12a/Chmp2a/Ephb2/Anxa2/Actg1/Ano6/Cd109/Pip5k1c/Myof/Hbegf/Pdgfb/Ptprj/Fcer1g/C1qtnf1/Pdpn/Hras/Prdx2/Tlr4/Cd9/Myh9/Fgf2/Elk3/Plat/Dysf/Col5a1/Ahnak/Anxa5/Vkorc1/Fermt3
GO:0010257	NADH dehydrogenase complex assembly	53	0.568632	2.02292	4.33e-05	0.00133362	0.00114007	1480	tags=38%, list=11%, signal=34%	Ndufa1/Ndufc1/Ndufa13/Ndufa2/Ndufc2/Ndufs6/Ndufa3/Ndufb9/Ndufs8/Ndufb11/Ndufa11/Ndufb7/Ndufb8/Ndufb6/Ndufa5/Ndufa6/Ndufs2/Ndufa8/Ndufb4/Ndufaf8
GO:0090266	regulation of mitotic cell cycle spindle assembly checkpoint	15	0.811747	2.2088	4.55e-05	0.00136143	0.00116384	796	tags=53%, list=6%, signal=50%	Cdca8/Anapc15/Ndc80/Incenp/Birc5/Knl1/Ccnb1/Mad2l1
GO:0043903	regulation of biological process involved in symbiotic interaction	45	0.597525	2.10384	4.74e-05	0.00139442	0.00119204	1297	tags=33%, list=9%, signal=30%	Ifitm3/Trim30a/Trim30d/Trim34a/Cav1/Trim25/Pomc/Lgals1/Trim21/Ly6e/Ifitm2/Trim12a/Cd74/Ifitm7/Trim5
GO:0009141	nucleoside triphosphate metabolic process	205	0.347571	1.54531	6.69e-05	0.00183499	0.00156867	1449	tags=27%, list=10%, signal=24%	Gapdh/Nme2/Ndufa1/Tspo/Ndufc1/Eno2/Ndufa13/Ndufa2/Cmpk2/Ier3/Ndufc2/Ndufs6/Ndufa3/Ndufb9/Hk2/Hspa8/Ndufs8/Pgam1/Uck2/Ndufb11/Aldoa/Ran/Nme1/Ndufa11/Git1/Ak5/Ndufb7/Fis1/Nupr1/Ndufb8/Ndufb6/Aldoc/Stat3/Cbfa2t3/Slc2a6/Sirt6/Ndufa5/Guk1/Ndufa7/Galt/Pgk1/Slc25a25/Trem2/Samhd1/Tpi1/Ndufa6/Ndufv1/Col6a1/Ndufs2/Ndufa8/Pfkp/Uqcc3/Rhoa/Pkm/Ndufb4
GO:0046688	response to copper ion	17	0.784123	2.19777	7.14e-05	0.0019281	0.00164827	759	tags=29%, list=5%, signal=28%	Cp/Mt3/Mt1/Mt2/Park7
GO:0002028	regulation of sodium ion transport	66	-0.602071	-1.76505	0.000114167	0.00282536	0.0024153	2221	tags=29%, list=16%, signal=24%	Nedd4l/Tmem168/Snta1/Sgk1/Ahcyl1/Fxyd4/Klhl24/Cnksr3/Nkain4/Fgf12/Slmap/Wnk2/Fgf14/Cntn1/Dmd/Akt3/Plcb1/Fgf13/Stk39
GO:0060004	reflex	18	-0.801005	-1.88407	0.00012277	0.00296891	0.00253802	508	tags=33%, list=4%, signal=32%	Glrb/Auts2/Satb1/Adra1a/Kcnma1/Foxp2
GO:0051783	regulation of nuclear division	102	0.41531	1.64432	0.000151811	0.00349562	0.00298828	1161	tags=26%, list=8%, signal=24%	Pde3a/Lif/Cdca2/Spc25/Cenpe/Mki67/Met/Cdca8/Anapc15/Pebp1/Kntc1/Nuf2/Ndc80/Incenp/Birc5/Knl1/Pdgfb/Spc24/Ccnb1/Fbxw5/Mad2l1/Nusap1/Rad51ap1/Ttk/Esr1/Camk2b/Zwilch
GO:0031333	negative regulation of protein-containing complex assembly	125	0.388755	1.63694	0.000164986	0.0036784	0.00314454	1170	tags=17%, list=8%, signal=16%	Irgm1/Trim30a/Tmsb10/Ifi204/Xaf1/Mndal/Cfl1/Pfn1/Cryab/Tmsb4x/Irgm2/Carmil2/Igtp/Hspa8/Stmn1/Kif14/Add3/Nop53/Eml2/Trem2/Sptb
GO:0022409	positive regulation of cell-cell adhesion	179	0.346276	1.51667	0.000165306	0.0036784	0.00314454	1527	tags=22%, list=11%, signal=20%	Cd44/Irgm1/Ccr5/Actb/Lgals9/H2-Q4/Il6ra/Aif1/B2m/Runx1/Igfbp2/Cav1/Icam1/Carmil2/H2-Q7/H2-T22/Cd274/Gcnt2/Lgals1/Ptprc/H2-D1/Socs1/H2-T23/Pdpn/H2-K1/Itga4/Hsp90aa1/Cd74/Mdk/Nfkbiz/Ets1/Tjp1/Tgfbr2/Selenok/Slc7a1/Ptpru/Rhoa/Sox4/Shb/Adam19
GO:0002396	MHC protein complex assembly	10	0.869991	2.11086	0.000170667	0.00375042	0.0032061	1017	tags=60%, list=7%, signal=56%	H2-Q4/B2m/H2-Q7/H2-D1/Tapbp/H2-K1
GO:2001185	regulation of CD8-positive, alpha-beta T cell activation	18	0.76165	2.16196	0.000183673	0.00397033	0.0033941	1321	tags=56%, list=9%, signal=50%	H2-Q4/Runx1/H2-Q7/H2-T22/Cd274/H2-D1/Socs1/H2-T23/H2-K1/Slc4a2
GO:0045861	negative regulation of proteolysis	158	0.370512	1.56272	0.000183373	0.00397033	0.0033941	1182	tags=20%, list=8%, signal=18%	A2m/Gpx1/Cd44/Gapdh/Serpina3n/Pcsk1n/Ifi204/Mndal/Cryab/Serping1/Cstb/Timp1/Pebp1/Pml/Cd109/Birc5/Cst3/Hsp90ab1/Park7/Bin1/Cast/Map1a/Ints1/Plat/Ubxn1/Wnt9a/Ctsz/Nop53/Col7a1/Cdkn2d/Pih1d1
GO:0021953	central nervous system neuron differentiation	143	-0.506252	-1.60362	0.000198731	0.00424388	0.00362794	2167	tags=28%, list=16%, signal=24%	Zswim6/Dync2h1/Arhgef28/Atp2b2/Atxn2/Pex5/Gnaq/Smo/Pten/Nrxn1/Ttc21b/Plxna4/Dicer1/Nfib/Gli3/Brinp3/Wnt7a/Nrp2/Epha4/Grid2/Slc25a46/Ephb3/Gigyf2/Rora/Ptch1/Fezf2/Nr2e1/Id4/Bmpr1b/Ephb1/Ptk2/Herc1/Sema3e/Gli2/Elavl4/Tox/Hes5/Dcc/Cdh11/Foxp2
GO:0019228	neuronal action potential	39	-0.669739	-1.81912	0.000218538	0.00460994	0.00394088	1007	tags=28%, list=7%, signal=26%	Kcnc4/Gpr35/Myh14/Kcnq3/Fgf12/Kcnmb2/Kcna2/Kcnd2/Chrna7/Kcnma1/Grik2
GO:0007249	canonical NF-kappaB signal transduction	182	0.349936	1.5154	0.000236174	0.00492433	0.00420964	1141	tags=20%, list=8%, signal=19%	Irgm1/Gapdh/Trim30a/Bcl3/Casp8/S100a13/Trim30d/Arrb2/Trim34a/Irgm2/Cav1/Stat1/Igtp/Traf1/Hspb1/Eda2r/Trim25/Gstp1/Uaca/Trim21/Zc3hav1/Rnf31/Tlr4/Ror1/Casp1/Tnfrsf1a/Trim12a/Ticam1/S100a4/Esr1/Relb/Nfkb2/Ccdc22/Trem2/S100b/Map3k14/Cd74
GO:0043122	regulation of canonical NF-kappaB signal transduction	161	0.362936	1.55555	0.00024655	0.0051205	0.00437734	1141	tags=20%, list=8%, signal=19%	Irgm1/Gapdh/Trim30a/Casp8/S100a13/Trim30d/Arrb2/Trim34a/Irgm2/Cav1/Stat1/Igtp/Traf1/Hspb1/Eda2r/Trim25/Gstp1/Uaca/Trim21/Zc3hav1/Rnf31/Tlr4/Ror1/Casp1/Tnfrsf1a/Trim12a/Ticam1/S100a4/Esr1/Ccdc22/Trem2/S100b/Cd74
GO:0050818	regulation of coagulation	32	0.611191	1.9816	0.000252216	0.00521771	0.00446044	1670	tags=47%, list=12%, signal=41%	Serping1/Cav1/Ephb2/Anxa2/Ano6/Pdgfb/C1qtnf1/Prdx2/Cd9/Plat/Anxa5/Vkorc1/Pdgfa/Pdgfra/Pros1
GO:0051651	maintenance of location in cell	166	0.354307	1.53896	0.000254978	0.00525434	0.00449176	1066	tags=16%, list=8%, signal=15%	Dbi/Ccr5/Tmsb10/Ftl1/Plce1/Sp100/Fth1/Tspo/Pfn1/Flna/Chchd10/Tmsb4x/Cav1/Calm3/Plch2/Jph3/Bard1/Hk2/Pml/Ptprc/Park7/Fgf2/Txn1/Aspm/Cyba/Mprip/Srgn
GO:0051304	chromosome separation	63	0.489476	1.78121	0.000257732	0.00529049	0.00452266	1387	tags=32%, list=10%, signal=29%	Top2a/Ncapg/Spc25/Cenpe/Cdca8/Anapc15/Kntc1/Nuf2/Ndc80/Incenp/Birc5/Knl1/Spc24/Ccnb1/Mad2l1/Espl1/Ttk/Zwilch/Ncapg2/Smc4
GO:0051963	regulation of synapse assembly	124	-0.517599	-1.6115	0.000261687	0.00535095	0.00457434	3932	tags=46%, list=28%, signal=33%	Lzts1/Lhfpl4/Lrrn3/Ube2v2/Pdlim5/Bhlhb9/Lzts3/Robo1/Abi3bp/Elavl2/Ntng2/Slitrk2/Mdga2/Syndig1/Epha7/Farp1/Vps35/Slitrk4/Slit2/Mycbp2/Gsk3b/Flrt2/Ptpn13/Lrrc4b/Lrtm1/Stau2/Setd5/Nrxn1/Dlg5/Mef2c/Chd4/Numb/Slitrk3/Wnt7a/Ntrk3/Grid2/Ogt/Ephb3/Adgrl2/Pik3r1/Ppp1r9a/Slitrk1/Adgrl3/Sema4a/Nlgn3/Adgrb3/Sema4d/Ephb1/Negr1/Ptk2/Nlgn1/Il1rapl1/Efna5/Adgrl1/Mdga1/Colq/Flrt1
GO:1902042	negative regulation of extrinsic apoptotic signaling pathway via death domain receptors	19	0.731884	2.06105	0.000275971	0.0055784	0.00476878	1098	tags=37%, list=8%, signal=34%	Gpx1/Hmox1/Pea15a/Icam1/Brca1/Park7/Hmgb2
GO:0032815	negative regulation of natural killer cell activation	10	0.859172	2.08461	0.000304669	0.00599825	0.0051277	1017	tags=80%, list=7%, signal=74%	Lgals9/H2-Q4/H2-Q7/H2-T22/H2-D1/H2-T23/Pglyrp1/H2-K1
GO:0016358	dendrite development	295	-0.441279	-1.45793	0.000304558	0.00599825	0.0051277	1988	tags=23%, list=14%, signal=20%	Parp6/Lrrk2/Tmem106b/Cdkl3/Mef2a/Mecp2/Stau2/Pten/Tnik/Ctnna2/Tbc1d24/Adam10/Dnm3/Abi1/Sgk1/Ptprz1/Dlg5/Mef2c/Numb/Spire1/Pias2/Itsn1/Hdac2/Cpeb3/Wnt7a/Uba6/Epha4/Crebbp/Nr3c1/Strn/Slc25a46/Kidins220/Bcl11a/Phactr1/Wls/Ephb3/Picalm/Abi2/Gpr37/Ppp1r9a/Cdkl5/Caprin2/Fezf2/Nlgn3/Ube3a/Mark1/Nr2e1/Adgrb3/Btbd3/Sema4d/Prickle1/Ephb1/Tet1/Epha5/Tanc2/Nlgn1/Abl2/Il1rapl1/Vldlr/Reln/Elavl4/Mapk8/Ngef/Chr…
GO:0042026	protein refolding	19	0.729194	2.05347	0.000316479	0.00615805	0.00526431	1077	tags=32%, list=8%, signal=29%	Hspb6/Cryab/B2m/Hspb1/Hspa8/Hsp90aa1
GO:0042744	hydrogen peroxide catabolic process	15	0.771619	2.09961	0.000327606	0.00628623	0.00537388	748	tags=27%, list=5%, signal=25%	Gpx1/Mt3/Prdx5/Prdx2
GO:0032689	negative regulation of type II interferon production	18	0.747686	2.12233	0.000345032	0.00650912	0.00556442	1819	tags=56%, list=13%, signal=48%	Irgm1/Lgals9/Cd274/Tlr4/Pglyrp1/Ddit3/Laptm5/C1qbp/Zc3h12a/Cd276
GO:0048145	regulation of fibroblast proliferation	94	0.425581	1.67264	0.000364864	0.00675636	0.00577578	1146	tags=26%, list=8%, signal=24%	Parp10/Lif/Hmga2/Fn1/Fth1/Fosl2/Mif/Cav1/Cdkn1a/Anxa2/Pml/Gstp1/Pdgfb/Socs1/Jun/Hras/Ccnb1/Nupr1/Ccna2/Sirt6/Esr1/Cdk6/Cd74/E2f1
GO:0098581	detection of external biotic stimulus	15	0.767171	2.0875	0.000392661	0.00717081	0.00613008	1128	tags=60%, list=8%, signal=55%	H2-Q4/Casp4/H2-Q7/Ssc5d/H2-D1/Tlr4/Pglyrp1/H2-K1/Trem2
GO:0051235	maintenance of location	250	0.310584	1.40818	0.000429602	0.00776509	0.00663811	1163	tags=15%, list=8%, signal=14%	Dbi/Mt3/Ccr5/Tmsb10/Ftl1/Plce1/Sp100/Fth1/Tspo/Pfn1/Cops9/Flna/Lgals9/Chchd10/Tmsb4x/Rnf213/Cav1/Calm3/Plch2/Jph3/Bard1/Hk2/Pml/Ptprc/Park7/B4galnt1/Fgf2/Txn1/Dysf/Aspm/Cyba/Ehd1/Mprip/Srgn/Tacc3/Ccdc22/Trem2/Ttc39d
GO:0097306	cellular response to alcohol	64	-0.590597	-1.72044	0.000511639	0.00888406	0.00759468	1745	tags=31%, list=12%, signal=27%	Creb1/Smo/Akap8/Pten/Sgk1/Acaca/Lrp6/Gpr155/Prkd1/Glra2/Prkaa2/Nr3c2/Ptch1/Gnai1/Hdac8/Epha5/Adcy8/Efna5/Gramd1b/Adcy2
GO:0071887	leukocyte apoptotic process	84	0.434018	1.67394	0.000616711	0.0105699	0.00903585	1386	tags=25%, list=10%, signal=23%	Cd44/Ccr5/Bcl3/Fas/Casp8/Pik3cd/Mif/Cd274/Irs2/Lgals3/Itgam/Chek2/Fcer1g/Siva1/Prelid1/Noc2l/Cd74/Nfkbiz/St3gal1/Lyn/Cxcl12
GO:0044057	regulation of system process	405	-0.41813	-1.3914	0.000618843	0.0105722	0.00903784	2295	tags=24%, list=16%, signal=20%	Yy1/Igfbp5/Pln/Camk2g/Pard3/Cxadr/Arhgap42/Atp2b1/Akap1/Ep300/Sod1/Lrrk2/Zdhhc21/Ptpro/Atp2a2/Adcy10/Homer1/Slc25a12/Snta1/Smad6/Mef2a/Mecp2/Pten/Abcc8/Grm3/Epb41/Grin2b/Akap9/Tbc1d24/Ece1/Dock4/Dlg1/Adra1b/Emp2/Ttn/Nrxn1/Grin2c/Tgfb2/Mef2c/Dicer1/Mdm4/Pde4d/Igf1/Prkd1/Fbxo32/Wnt7a/Ctnna3/Myh6/Setd3/Kcnc4/Hdac4/Gpr35/Unc13b/Npy1r/Nr3c1/Ednra/Pde9a/Cry2/Fgf12/Ppara/Pik3r1/Nmur2/Fto/Nlgn3/Smad4/Thr…
GO:0070227	lymphocyte apoptotic process	60	0.47676	1.76544	0.000644582	0.0109414	0.0093534	1333	tags=27%, list=10%, signal=24%	Cd44/Bcl3/Fas/Casp8/Mif/Cd274/Irs2/Lgals3/Chek2/Siva1/Prelid1/Noc2l/Cd74/Nfkbiz/St3gal1/Lyn
GO:0033865	nucleoside bisphosphate metabolic process	80	-0.553623	-1.65752	0.000727224	0.0120356	0.0102888	3914	tags=50%, list=28%, signal=36%	Nudt7/Pdhb/Acadsb/Pdk2/Tdo2/Mlycd/Mmut/Fitm2/Pdk1/Dlat/Sucla2/Pank3/Acsl4/Acot6/Dld/Suclg2/Ehhadh/Slc25a42/Suclg1/Hmgcr/Hmgcs1/Mccc2/Pdhx/Pank2/Acly/Hsd17b4/Acot11/Acaca/Hmgcs2/Papss2/Acsl1/Acsl3/Acss1/Acsl6/Acaa2/Acsm5/Far1/Pank1/Mvd/Acss2
GO:0034032	purine nucleoside bisphosphate metabolic process	80	-0.553623	-1.65752	0.000727224	0.0120356	0.0102888	3914	tags=50%, list=28%, signal=36%	Nudt7/Pdhb/Acadsb/Pdk2/Tdo2/Mlycd/Mmut/Fitm2/Pdk1/Dlat/Sucla2/Pank3/Acsl4/Acot6/Dld/Suclg2/Ehhadh/Slc25a42/Suclg1/Hmgcr/Hmgcs1/Mccc2/Pdhx/Pank2/Acly/Hsd17b4/Acot11/Acaca/Hmgcs2/Papss2/Acsl1/Acsl3/Acss1/Acsl6/Acaa2/Acsm5/Far1/Pank1/Mvd/Acss2
GO:0046597	negative regulation of viral entry into host cell	24	0.644389	1.96354	0.000780155	0.0128236	0.0109625	1297	tags=42%, list=9%, signal=38%	Ifitm3/Trim30a/Trim30d/Trim25/Ly6e/Ifitm2/Trim12a/Cd74/Ifitm7/Trim5
GO:0008625	extrinsic apoptotic signaling pathway via death domain receptors	58	0.482422	1.7597	0.000782104	0.0128236	0.0109625	1098	tags=22%, list=8%, signal=21%	Gpx1/Hmox1/Fas/Sp100/Casp8/Pea15a/Icam1/Lgals3/Brca1/Gabarap/Park7/Tnfrsf1a/Hmgb2
GO:0072567	chemokine (C-X-C motif) ligand 2 production	12	0.808596	2.05184	0.000801266	0.0130569	0.0111619	1141	tags=50%, list=8%, signal=46%	Oas1a/Ccn1/Mif/Tlr4/Mbp/Cd74
GO:0031644	regulation of nervous system process	116	-0.51783	-1.60505	0.00080464	0.0130717	0.0111745	1939	tags=26%, list=14%, signal=22%	Lrrk2/Homer1/Slc25a12/Pten/Grm3/Grin2b/Tbc1d24/Nrxn1/Grin2c/Dicer1/Igf1/Wnt7a/Kcnc4/Gpr35/Unc13b/Fgf12/Nmur2/Nlgn3/Lpin1/Nlgn1/Prkn/Rims2/Fig4/Reln/Mgll/Chrna7/Slc8a3/Pclo/Grik2/Shisa9
GO:0061000	negative regulation of dendritic spine development	15	-0.795078	-1.7883	0.000827419	0.0133598	0.0114208	1754	tags=60%, list=13%, signal=53%	Mecp2/Pten/Dnm3/Hdac2/Nlgn3/Ube3a/Nlgn1/Ngef/Grin3a
GO:0035457	cellular response to interferon-alpha	12	0.807045	2.0479	0.000827253	0.0133598	0.0114208	799	tags=33%, list=6%, signal=31%	Ifit1/Oas1a/Ifi204/Ifit2
GO:0048511	rhythmic process	232	-0.447787	-1.45793	0.000890686	0.0141654	0.0121095	2720	tags=30%, list=19%, signal=24%	Foxo3/Igf1r/Kdm2a/Tardbp/Mycbp2/Gsk3b/Enox1/Lhcgr/Enox2/Egfr/Cipc/Rbm4/Mttp/Rorb/Ncor1/Clock/Ep300/Dyrk1a/Huwe1/Dbp/Creb1/Pten/Grin2b/Per3/Plekha1/Nr1d1/Rorc/Ncoa2/Hnrnpu/Pspc1/Pde4d/Igf1/Hdac2/Npas2/Nr1d2/Crebbp/Ntrk3/Prkaa2/Ogt/Cckbr/Cry2/Rora/Scaper/Ppara/Fbxw7/Nlgn3/Ube3a/Kdm5b/Id4/Phlpp1/Bmpr1b/Ppargc1a/Pgr/Enpp2/Kcna2/Hlf/Nlgn1/Fbxl17/Arrb1/Kcnd2/Hrh1/Gpr176/Mapk8/Gas2/Chrna7/Sfpq/Fbxl3/Gri…
GO:0032653	regulation of interleukin-10 production	26	0.630007	1.95428	0.00092791	0.0146693	0.0125403	1128	tags=38%, list=8%, signal=35%	Bcl3/Lgals9/Rbm47/Cd274/Tyrobp/Fcer1g/Tusc2/Tlr4/Stat3/Trem2
GO:0007159	leukocyte cell-cell adhesion	224	0.317022	1.41918	0.00103912	0.0161859	0.0138367	1458	tags=21%, list=10%, signal=19%	Cd44/Irgm1/Actb/Lgals9/H2-Q4/Aif1/Podxl2/B2m/Runx1/Igfbp2/Msn/Cav1/Icam1/Carmil2/Itga5/H2-Q7/H2-T22/Cebpb/Cd274/Hspb1/Lgals3/Gstp1/Lgals1/Itgam/Ptprc/H2-D1/Socs1/H2-T23/Gpnmb/Prdx2/H2-K1/Itga4/Hsp90aa1/Fermt3/Cd74/Mdk/Nfkbiz/Ets1/Tgfbr2/Slc4a2/Selenok/Cxcl12/Slc7a1/Rhoa/Laptm5/Sox4
GO:0048545	response to steroid hormone	165	-0.473134	-1.5112	0.00107553	0.0166064	0.0141962	3244	tags=38%, list=23%, signal=30%	Ubr5/Safb2/Rnf6/Agl/Peg13/Klf9/Kdm3a/Npc1/Eif4e/Rxra/Gsk3b/Idh1/Tbl1x/Calcoco1/Yap1/Lats1/Acsbg1/Ddx17/Casp9/Ncor1/Crebrf/Clock/Vps54/Ep300/Esrrg/Kdm5d/Acaa1a/Arid1a/Adra1b/Sgk1/Tgfb2/Ncoa2/Maob/Sult1a1/Strn3/Hnrnpu/Trerf1/Pias2/Igf1/Ufl1/Fbxo32/Ncoa1/Paqr8/Nr3c1/Paqr7/Kdm4c/Nr3c2/Cry2/Kmt2d/Pik3r1/Ube3a/Hdac8/Esrrb/Cnot2/Pgr/Lmo3/Tfap4/Ppargc1b/Smyd3/Padi2/Alpl/Uri1/Stk39
GO:0021697	cerebellar cortex formation	27	-0.688618	-1.74078	0.00114741	0.0175121	0.0149705	2049	tags=37%, list=15%, signal=32%	Atp2b2/Atxn2/Nrxn1/Ttc21b/Wnt7a/Grid2/Slc25a46/Rora/Herc1/Foxp2
GO:0051383	kinetochore organization	20	0.673844	1.90434	0.00116093	0.0176168	0.01506	1412	tags=55%, list=10%, signal=50%	Dlgap5/Cenpe/Kntc1/Nuf2/Cenph/Ndc80/Cenpw/Cenpa/Cenpk/Smc4/Cenpx
GO:1990806	ligand-gated ion channel signaling pathway	27	-0.683932	-1.72893	0.00126102	0.0189725	0.016219	1892	tags=37%, list=14%, signal=32%	Gnaq/Grin2b/Plp1/Grin2c/Gria2/Trpc1/Plcb1/Kalrn/Grin3a/Cpeb4
GO:0071353	cellular response to interleukin-4	19	0.685047	1.92915	0.00125799	0.0189725	0.016219	905	tags=26%, list=6%, signal=25%	Tuba1b/Parp14/Pml/Hsp90ab1/Tcf7
GO:0050832	defense response to fungus	18	0.702981	1.99543	0.0013548	0.0201546	0.0172295	656	tags=22%, list=5%, signal=21%	Gapdh/Pik3cd/Pomc/Rarres2
GO:0051341	regulation of oxidoreductase activity	43	0.521987	1.82374	0.00141136	0.0208206	0.0177988	1014	tags=26%, list=7%, signal=24%	Mt3/S100a1/Lgals9/Cav1/Taco1/Prdx5/Gstp1/Park7/Ndufa4/Cox17/Esr1
GO:0006814	sodium ion transport	146	-0.48385	-1.53309	0.00142405	0.0209493	0.0179089	2221	tags=25%, list=16%, signal=21%	Nedd4l/Tmem168/Catsper3/Gm13629/Cpox/Slc20a2/Slc6a1/Snta1/Slc9a9/Sgk1/Slc9a7/Ahcyl1/Tpcn1/Fxyd4/Klhl24/Cnksr3/Nkain4/Ednra/Slc13a5/Fgf12/Pkd2/Slc6a11/Slmap/Wnk2/Slc8b1/Fgf14/Cntn1/Dmd/Slc20a1/Slc24a3/Akt3/Plcb1/Slc6a6/Fgf13/Slc8a3/Stk39
GO:0035725	sodium ion transmembrane transport	96	-0.521016	-1.58159	0.00147694	0.0214887	0.01837	2221	tags=26%, list=16%, signal=22%	Nedd4l/Tmem168/Gm13629/Slc6a1/Snta1/Slc9a9/Slc9a7/Tpcn1/Fxyd4/Klhl24/Cnksr3/Fgf12/Pkd2/Slc6a11/Slmap/Wnk2/Slc8b1/Fgf14/Dmd/Slc24a3/Plcb1/Slc6a6/Fgf13/Slc8a3/Stk39
GO:0006637	acyl-CoA metabolic process	66	-0.561574	-1.64633	0.00163905	0.0233344	0.0199478	3914	tags=50%, list=28%, signal=36%	Nudt7/Pdhb/Acadsb/Pdk2/Tdo2/Mlycd/Mmut/Fitm2/Pdk1/Dlat/Sucla2/Acsl4/Acot6/Dld/Suclg2/Ehhadh/Suclg1/Hmgcs1/Pdhx/Acly/Hsd17b4/Acot11/Acaca/Hmgcs2/Acsl1/Acsl3/Acss1/Acsl6/Acaa2/Acsm5/Far1/Mvd/Acss2
GO:2000106	regulation of leukocyte apoptotic process	63	0.44976	1.63668	0.00163448	0.0233344	0.0199478	1386	tags=25%, list=10%, signal=23%	Cd44/Ccr5/Bcl3/Casp8/Pik3cd/Mif/Cd274/Irs2/Lgals3/Fcer1g/Prelid1/Noc2l/Cd74/St3gal1/Lyn/Cxcl12
GO:0070670	response to interleukin-4	20	0.657574	1.85836	0.00181843	0.0255178	0.0218143	905	tags=25%, list=6%, signal=23%	Tuba1b/Parp14/Pml/Hsp90ab1/Tcf7
GO:0006879	intracellular iron ion homeostasis	50	0.484862	1.72132	0.00182133	0.0255178	0.0218143	628	tags=16%, list=4%, signal=15%	Cp/Hmox1/Ftl1/Fth1/Slc39a14/B2m/Bola2/Trf
GO:0048247	lymphocyte chemotaxis	23	-0.706947	-1.73077	0.00183798	0.0256832	0.0219557	408	tags=13%, list=3%, signal=13%	Slc8b1/Padi2/Stk39
GO:0036315	cellular response to sterol	17	-0.750678	-1.74829	0.00189083	0.0260778	0.022293	1742	tags=47%, list=12%, signal=41%	Smo/Rorc/Lrp6/Gpr155/Rora/Ptch1/Insig1/Gramd1b
GO:0048146	positive regulation of fibroblast proliferation	55	0.474641	1.7226	0.00188929	0.0260778	0.022293	1146	tags=33%, list=8%, signal=30%	Lif/Hmga2/Fn1/Fosl2/Mif/Cdkn1a/Anxa2/Pml/Pdgfb/Jun/Hras/Ccnb1/Ccna2/Sirt6/Esr1/Cdk6/Cd74/E2f1
GO:0090596	sensory organ morphogenesis	194	-0.450027	-1.44884	0.00187277	0.0260778	0.022293	2488	tags=28%, list=18%, signal=23%	Ppp2r3a/Intu/Pax6/Rpgr/Yy1/Fgf9/Tshz1/Nf1/Rorb/Hipk2/Chd7/Crb1/Sobp/Abr/Ptk7/Atp2b2/Eya1/Sod1/Fgfr3/Large1/Notch2/Zic3/Stau2/Fzd2/Arid1a/Alms1/Sox8/Lrp6/Bloc1s5/Nipbl/Hdac2/Gli3/Msx1/Dzank1/Eya4/Ednra/Bcar3/Abi2/Thrb/Cdon/Ephb1/Lrig3/Nectin3/Vegfa/Pou2f1/Myo3b/Insig1/Zeb1/Gli2/Man2a1/Jag1/Celsr1/Ttc39c/Fat3
GO:0043243	positive regulation of protein-containing complex disassembly	29	0.586807	1.85869	0.00191629	0.026292	0.0224761	629	tags=28%, list=5%, signal=26%	Irgm1/Cfl1/Nes/Irgm2/Carmil2/Igtp/Eif5a/Wdr1
GO:0051100	negative regulation of binding	107	0.376842	1.51046	0.00195707	0.0267821	0.0228951	933	tags=19%, list=7%, signal=18%	1810037I17Rik/Hmga2/Ifi204/Sp100/Mndal/Actb/Nes/Tle5/B2m/Arrb2/Cdkn1a/Rack1/Pdgfb/Pin1/Jun/Park7/Ybx2/Ifit2/Mapk3/Dysf
GO:0007626	locomotory behavior	211	-0.445262	-1.44169	0.0020239	0.0274835	0.0234947	2145	tags=24%, list=15%, signal=21%	Hipk2/Chd7/Slc18a2/Sobp/Ncor1/Atp2b2/Sod1/Vps13a/Lrrk2/Large1/Mecp2/Ppp1r1b/Pten/Adra1b/Ncoa2/Astn1/Npas2/Uba6/Gad1/Epha4/Npy1r/Bahcc1/Strn/Slc25a46/Fgf12/Mapt/Gigyf2/Gpr37/Fezf2/Adgrl3/Ube3a/Glrb/Negr1/Fgf14/Cntn1/Prkn/Abl2/Dmd/Crbn/Adcy8/Gnao1/Fig4/Kcnd2/Reln/Elavl4/Celsr1/Lsamp/Kalrn/Adam22/Dab1/Kcnma1
GO:0002070	epithelial cell maturation	13	-0.787302	-1.71543	0.00206249	0.0276167	0.0236085	519	tags=31%, list=4%, signal=30%	Pgr/Rfx3/Vegfa/Kcnma1
GO:0070228	regulation of lymphocyte apoptotic process	41	0.516129	1.78032	0.00205409	0.0276167	0.0236085	1333	tags=29%, list=10%, signal=27%	Cd44/Bcl3/Casp8/Mif/Cd274/Irs2/Lgals3/Prelid1/Noc2l/Cd74/St3gal1/Lyn
GO:0050804	modulation of chemical synaptic transmission	482	-0.394186	-1.31616	0.0020925	0.0279141	0.0238628	2067	tags=20%, list=15%, signal=18%	Abr/Atp2b2/Cd2ap/Unc13c/Fbxl20/Ptpra/Lrrk2/Atp2a2/Slc6a1/Homer1/Large1/Mecp2/Ythdf1/Creb1/Stau2/Plppr4/Pten/Grm3/Grin2b/Dgki/Tbc1d24/Nrxn1/Grin2c/Gnal/Sv2c/Mef2c/Cspg5/Abhd6/Prrt1/Erbb4/Akap7/Gria2/Igf1/Pnkd/Cpeb3/Kras/Wnt7a/Kcnc4/Snx14/Epha4/Tent2/Unc13b/Npy1r/Nr3c1/Grid2/Stxbp5/Prkar2b/Nr3c2/Pde9a/Kcnq3/Cckbr/Cacna2d2/Mapt/Cpeb2/Gnai1/Ppp1r9a/Cdkl5/Stx3/Nlgn3/Ube3a/Car7/Nr2e1/Slc7a10/Ncan/Nptn/…
GO:0002573	myeloid leukocyte differentiation	169	0.327377	1.43516	0.00213091	0.028355	0.0242397	1333	tags=22%, list=10%, signal=21%	Sbno2/Lif/Nme2/Ifi204/Mndal/Casp8/Fosl2/Clec2d/Runx1/Tcirg1/Inpp5d/Fos/Cebpb/Tnfrsf11b/Rbp1/Lrrk1/Tyrobp/Trib1/C1qc/Cd109/Junb/Itgam/Socs1/Fcer1g/Trf/Jun/Nme1/Tlr4/Cbfa2t3/Gpr137/Cdk6/Relb/Trem2/Cd74/Ikzf1/Tgfbr2/Slc4a2/Lyn
GO:0032656	regulation of interleukin-13 production	17	0.675404	1.89305	0.00226301	0.0293747	0.0251114	1017	tags=41%, list=7%, signal=38%	H2-Q4/H2-Q7/H2-T22/H2-D1/H2-T23/Tlr4/H2-K1
GO:0000768	syncytium formation by plasma membrane fusion	41	0.511385	1.76396	0.00225241	0.0293747	0.0251114	1601	tags=44%, list=11%, signal=39%	Cd44/Sbno2/Stat1/Tyrobp/Cd109/Tanc1/Dock2/Cd9/Myh9/Ehd2/Casp1/Dock5/Ehd1/Trem2/Cxcl12/Nfatc2/Ntn3/Flot1
GO:0140253	cell-cell fusion	41	0.511385	1.76396	0.00225241	0.0293747	0.0251114	1601	tags=44%, list=11%, signal=39%	Cd44/Sbno2/Stat1/Tyrobp/Cd109/Tanc1/Dock2/Cd9/Myh9/Ehd2/Casp1/Dock5/Ehd1/Trem2/Cxcl12/Nfatc2/Ntn3/Flot1
GO:0008202	steroid metabolic process	181	-0.463091	-1.48782	0.00236436	0.0303924	0.0259814	3001	tags=34%, list=21%, signal=27%	Srebf2/Npc1/Dhcr24/Dhrs11/Hsd17b11/Fmo5/Igf1r/Hmgcr/Tiparp/Lpcat3/Fech/Pex2/Kit/Cyp51/Lhcgr/Aplp2/Hmgcs1/Asah1/Sec14l2/Mttp/Sc5d/Cat/Nsdhl/Pank2/Sod1/Stard4/Ldlr/Hsd17b4/Mecp2/Creb1/Acaa1a/Soat1/Plekha1/Nr1d1/Cyp2r1/Rorc/Disp3/Sult1a1/Fgf1/Hmgcs2/Igf1/Acox2/Tm7sf2/Nr3c1/Prkaa2/Hsd11b1/Rora/Pbx1/Ttc39b/Thrb/Bmpr1b/Ppargc1a/Fdft1/Pde8b/Vldlr/Chst10/Lss/Insig1/Hrh1/Mvd/Abca5/Kcnma1
GO:0009190	cyclic nucleotide biosynthetic process	14	-0.778435	-1.73129	0.00246259	0.0315021	0.0269301	303	tags=50%, list=2%, signal=49%	Gucy1b1/Adcy10/Adcy8/Gucy2f/Adcy2/Gucy2e/Gucy1a1
GO:0021952	central nervous system projection neuron axonogenesis	27	-0.665415	-1.68212	0.00248882	0.0317609	0.0271513	1340	tags=33%, list=10%, signal=30%	Plxna4/Nfib/Epha4/Ephb3/Nr2e1/Ephb1/Gli2/Dcc/Cdh11
GO:0071280	cellular response to copper ion	11	0.78745	1.905	0.00257065	0.032492	0.0277763	692	tags=27%, list=5%, signal=26%	Mt3/Mt1/Mt2
GO:0006949	syncytium formation	43	0.504988	1.76435	0.00266562	0.0335323	0.0286656	1601	tags=42%, list=11%, signal=37%	Cd44/Sbno2/Stat1/Tyrobp/Cd109/Tanc1/Dock2/Cd9/Myh9/Ehd2/Casp1/Dock5/Ehd1/Trem2/Cxcl12/Nfatc2/Ntn3/Flot1
GO:0050817	coagulation	88	0.3967	1.55512	0.00272137	0.0339114	0.0289897	1468	tags=30%, list=11%, signal=27%	Flna/Serping1/Il6ra/Ppia/Cav1/Ephb2/Anxa2/Ano6/Pip5k1c/Pdgfb/Ptprj/Fcer1g/C1qtnf1/Pdpn/Prdx2/Tlr4/Cd9/Plat/Anxa5/Vkorc1/Fermt3/Lyn/Bloc1s4/Pdgfa/Pdgfra/Fundc2
GO:1902652	secondary alcohol metabolic process	104	-0.494783	-1.51345	0.00286272	0.0354229	0.0302818	3593	tags=39%, list=26%, signal=30%	Angptl3/Sqle/Acadl/Dgkq/Lima1/Srebf2/Aco2/Npc1/Dhcr24/Fmo5/Hmgcr/Lpcat3/Fech/Pex2/Idh1/Cyp51/Aplp2/Hmgcs1/Sec14l2/Mttp/Sc5d/Cat/Nsdhl/Sod1/Stard4/Ldlr/Soat1/Cyp2r1/Disp3/Fgf1/Hmgcs2/Tm7sf2/Prkaa2/Ttc39b/Thrb/Fdft1/Vldlr/Lss/Insig1/Mvd/Abca5
GO:1901623	regulation of lymphocyte chemotaxis	12	-0.809048	-1.73324	0.00287775	0.0355258	0.0303698	408	tags=33%, list=3%, signal=32%	Adam10/Slc8b1/Padi2/Stk39
GO:0014897	striated muscle hypertrophy	90	-0.527615	-1.59853	0.00293128	0.0358905	0.0306816	3871	tags=44%, list=28%, signal=32%	Rbm10/Akap6/Sirt1/Pdlim5/Pak1/Mtor/Foxo1/Ppp3ca/Zfp418/Rap1gds1/Meis1/Tomm70a/Rock1/Gsk3b/Sorbs2/Yy1/Igfbp5/Klf15/Akap1/Ep300/Map2k4/Atp2a2/Adcy10/Mef2a/Ece1/Adra1b/Ttn/Mef2c/Igf1/Fbxo32/Myh6/Nr3c1/Pde9a/Ppara/Smad4/Ctdp1/Ptk2/Myoc/Jarid2/Adra1a
GO:0036294	cellular response to decreased oxygen levels	96	-0.50695	-1.53889	0.00296847	0.0361403	0.0308951	993	tags=19%, list=7%, signal=18%	Epha4/Kdm6a/Cbs/Ogt/Rora/Cpeb2/Atf2/Acvr2a/Acaa2/Vegfa/Vldlr/Ak4/Kcnk2/Kcnd2/Mapk8/Fmn2/Slc8a3/Cpeb4
GO:0009620	response to fungus	22	0.620753	1.84116	0.00299235	0.0363474	0.0310722	656	tags=18%, list=5%, signal=17%	Gapdh/Pik3cd/Pomc/Rarres2
GO:1904892	regulation of receptor signaling pathway via STAT	61	0.436271	1.60831	0.00304755	0.0368489	0.0315008	595	tags=21%, list=4%, signal=20%	Bcl3/Lif/Hmga2/Socs3/Parp14/Agap2/Il6ra/Cav1/Gadd45a/Ephb2/Ptprc/Camk2a/Socs1
GO:0099177	regulation of trans-synaptic signaling	483	-0.392448	-1.31083	0.0030554	0.0368597	0.0315101	2067	tags=20%, list=15%, signal=18%	Abr/Atp2b2/Cd2ap/Unc13c/Fbxl20/Ptpra/Lrrk2/Atp2a2/Slc6a1/Homer1/Large1/Mecp2/Ythdf1/Creb1/Stau2/Plppr4/Pten/Grm3/Grin2b/Dgki/Tbc1d24/Nrxn1/Grin2c/Gnal/Sv2c/Mef2c/Cspg5/Abhd6/Prrt1/Erbb4/Akap7/Gria2/Igf1/Pnkd/Cpeb3/Kras/Wnt7a/Kcnc4/Snx14/Epha4/Tent2/Unc13b/Npy1r/Nr3c1/Grid2/Stxbp5/Prkar2b/Nr3c2/Pde9a/Kcnq3/Cckbr/Cacna2d2/Mapt/Cpeb2/Gnai1/Ppp1r9a/Cdkl5/Stx3/Nlgn3/Ube3a/Car7/Nr2e1/Slc7a10/Ncan/Nptn/…
GO:0048813	dendrite morphogenesis	180	-0.449514	-1.4443	0.00308626	0.0371474	0.031756	1988	tags=27%, list=14%, signal=23%	Parp6/Lrrk2/Tmem106b/Cdkl3/Mef2a/Stau2/Pten/Tnik/Ctnna2/Tbc1d24/Adam10/Dnm3/Abi1/Sgk1/Ptprz1/Numb/Pias2/Wnt7a/Epha4/Kidins220/Phactr1/Wls/Ephb3/Picalm/Abi2/Ppp1r9a/Cdkl5/Caprin2/Nlgn3/Ube3a/Nr2e1/Adgrb3/Btbd3/Sema4d/Ephb1/Tet1/Epha5/Tanc2/Nlgn1/Abl2/Il1rapl1/Vldlr/Reln/Elavl4/Mapk8/Ngef/Chrna7/Kalrn
GO:0009263	deoxyribonucleotide biosynthetic process	16	0.676966	1.87526	0.00324141	0.0386633	0.033052	938	tags=38%, list=7%, signal=35%	Nme2/Cmpk2/Rrm2/Nme1/Shmt1/Guk1
GO:0046385	deoxyribose phosphate biosynthetic process	16	0.676966	1.87526	0.00324141	0.0386633	0.033052	938	tags=38%, list=7%, signal=35%	Nme2/Cmpk2/Rrm2/Nme1/Shmt1/Guk1
GO:0042770	signal transduction in response to DNA damage	150	0.326135	1.39396	0.00330977	0.0393017	0.0335976	1146	tags=17%, list=8%, signal=16%	Cd44/Bcl3/Sp100/Ccnd1/Parp9/Mif/Cdkn1a/Gadd45a/Ier3/Bard1/Sesn2/E2f7/Pml/Clspn/Chek2/Dtl/Brca1/Ticrr/Mapk3/Cdk5rap3/Dtx3l/Znhit1/Fancd2/Nop53/Cd74/E2f1
GO:1903729	regulation of plasma membrane organization	16	0.674663	1.86888	0.00335649	0.0395902	0.0338443	1013	tags=31%, list=7%, signal=29%	S100a10/Atp10a/Anxa2/Myh9/Ahnak
GO:0023035	CD40 signaling pathway	10	0.791244	1.9198	0.00344233	0.0404225	0.0345558	1128	tags=50%, list=8%, signal=46%	Itga5/Fanca/Rnf31/Fancd2/Trem2
GO:0001702	gastrulation with mouth forming second	27	-0.650508	-1.64444	0.00353912	0.0412679	0.0352785	1748	tags=33%, list=13%, signal=29%	Zic3/Amot/Lrp6/Plpp3/Smad4/Prickle1/Acvr2a/Acvr2b/Nat8f3
GO:0098792	xenophagy	14	0.709472	1.89454	0.00353885	0.0412679	0.0352785	849	tags=43%, list=6%, signal=40%	Irgm1/Rnf213/Irgm2/Igtp/Rnf31/Mapk3
GO:0055017	cardiac muscle tissue growth	83	-0.517888	-1.55304	0.00355716	0.041313	0.0353171	3871	tags=53%, list=28%, signal=39%	Rbm10/Akap6/Mapk1/Sirt1/Pdlim5/Pak1/Mtor/Zfp418/Fgfr2/Meis1/Tomm70a/Bmpr1a/Gja1/Vgll4/Ncam1/Rxra/Zfpm2/Gsk3b/Sorbs2/Yy1/Yap1/Fgf9/Cxadr/Ep300/Map2k4/Pten/S1pr1/Adra1b/Tgfb2/Mef2c/Fgf1/Arid2/Erbb4/Igf1/Hdac2/Dipk2a/Apc/Nr3c1/Ppara/Ctdp1/Kcnk2/Gli1/Jarid2/Adra1a
GO:0035249	synaptic transmission, glutamatergic	107	-0.495343	-1.52202	0.00359237	0.0415397	0.0355109	4340	tags=48%, list=31%, signal=33%	Serpine2/Grm4/Atad1/Cacng3/Zzef1/Myo5a/Als2/Aph1b/Cln3/Rab3gap1/Pak1/Fxr1/Shc3/Peg13/Iqsec2/Clcn3/Dcdc2a/Kmo/Tshz3/Gria1/Glul/Grik1/Cnr1/Cnih3/Egfr/Nf1/Napb/Unc13c/Vps54/Lrrk2/Homer1/Plppr4/Abcc8/Grm3/Grin2b/Dgki/Nrxn1/Grin2c/Mef2c/Gria2/Unc13b/Nr3c1/Grid2/Cckbr/Nlgn3/Grid1/Nlgn1/Prkn/Reln/Grin3a/Grik2
GO:0051962	positive regulation of nervous system development	310	-0.40794	-1.34978	0.00361816	0.0417468	0.0356879	2033	tags=25%, list=15%, signal=21%	Lrrc4b/Aspa/Parp6/Ptpra/Lrtm1/Ep300/Cdkl3/Adcy10/Notch2/Mecp2/Smo/Stau2/Tnik/Tbc1d24/Sgk1/Nrxn1/Ptprz1/Sox8/Dlg5/Numb/Plxna4/Pias2/Rufy3/Dicer1/Igf1/Ufl1/Hdac2/Slitrk3/Gli3/Kras/Wnt7a/Golga4/Synj1/Epha4/Plag1/Ntrk3/Grid2/Bcl11a/Mapt/Wls/Ephb3/Adgrl2/Picalm/Pik3r1/Cdkl5/Caprin2/Slitrk1/Adgrl3/Sema4a/Nlgn3/Nr2e1/Adgrb3/Id4/Ncan/Nptn/Sema4d/Plxnc1/Cdon/Ephb1/Enpp2/Vegfa/Ptk2/Nlgn1/Il1rapl1/Efna5/Arh…
GO:0007623	circadian rhythm	168	-0.456768	-1.46065	0.00368442	0.042144	0.0360275	3751	tags=38%, list=27%, signal=28%	Sirt1/Piwil2/Top1/Ddx5/Mtor/Cry1/Lgr4/Csnk1e/Fxr1/Usp9x/Hnrnpd/Kdm8/Suv39h2/Prkdc/Mapk9/Ankfn1/Kdm2a/Tardbp/Mycbp2/Gsk3b/Cipc/Rbm4/Mttp/Rorb/Ncor1/Clock/Ep300/Dyrk1a/Huwe1/Dbp/Creb1/Pten/Per3/Nr1d1/Rorc/Ncoa2/Hnrnpu/Pspc1/Igf1/Hdac2/Npas2/Nr1d2/Ntrk3/Prkaa2/Ogt/Cry2/Rora/Ppara/Fbxw7/Nlgn3/Ube3a/Kdm5b/Id4/Phlpp1/Ppargc1a/Kcna2/Nlgn1/Fbxl17/Kcnd2/Gpr176/Mapk8/Sfpq/Fbxl3/Kcnma1
GO:0051983	regulation of chromosome segregation	104	0.348643	1.41194	0.00370252	0.0422193	0.0360919	1161	tags=21%, list=8%, signal=20%	Actb/Ncapg/Cdca2/Spc25/Cenpe/Mki67/Cdca8/Anapc15/Kntc1/Nuf2/Nek6/Ndc80/Incenp/Birc5/Knl1/Spc24/Ccnb1/Mad2l1/Rmi2/Ttk/Tacc3/Zwilch
GO:0045664	regulation of neuron differentiation	169	-0.448987	-1.43682	0.00375691	0.0426051	0.0364216	3216	tags=36%, list=23%, signal=28%	Meis1/Gprc5b/Sox5/Brinp2/Hmg20a/Rock1/Cpne1/Zc4h2/Eif4e/Nrep/Impact/Eif4enif1/Foxo3/Tcf12/Dleu2/Epo/Rap1gap/Gsk3b/Pax6/Opa1/Shoc2/Nf1/Eya1/Lrrk2/Fgfr3/Pten/Ddx6/Disp3/Sox8/Mef2c/Numb/Dicer1/Ttc3/Gli3/Brinp3/Spag9/Mmd2/Dtx1/Ncoa1/Rgs6/Sall1/Bcl11a/Zfp536/Fezf2/Pbx1/Nr2e1/Id4/Cdon/Mib1/Nlgn1/Dmd/Zeb1/Gli2/Reln/Mapk8/Jag1/Hes5/Nox1/Map3k13/Dab1
GO:2000379	positive regulation of reactive oxygen species metabolic process	53	0.467923	1.66465	0.0037691	0.0426521	0.0364618	976	tags=28%, list=7%, signal=26%	Nox4/Slc5a3/Tspo/Romo1/Cdkn1a/Gadd45a/Tyrobp/Eif5a/Gstp1/Itgam/Pdgfb/Park7/Tlr4/Cyba/Cyp1b1
GO:0043124	negative regulation of canonical NF-kappaB signal transduction	46	0.479753	1.69473	0.00382489	0.0430992	0.036844	1128	tags=24%, list=8%, signal=22%	Irgm1/Casp8/Arrb2/Irgm2/Stat1/Igtp/Gstp1/Uaca/Esr1/Ccdc22/Trem2
GO:0035107	appendage morphogenesis	116	-0.493884	-1.53083	0.00392021	0.0438004	0.0374435	3643	tags=40%, list=26%, signal=30%	Nfia/Bmp7/Ift140/Fuz/Cplane1/Psen2/Fgfr2/Bmpr1a/Gja1/Lrp4/Flvcr1/Pcsk5/Intu/Fgf9/Chd7/Plxna2/Dync2h1/Vps54/Gnaq/Large1/Notch2/Zic3/Ece1/Tbc1d32/Mbnl1/Tgfb2/Asph/Atrx/Lrp6/Dicer1/Nipbl/Sall3/Hdac2/Gli3/Wnt7a/Lmbr1/Msx1/Pbx2/Fras1/Sall1/Ptch1/Pbx1/Smad4/Lnpk/Prickle1/Gli2
GO:0007259	receptor signaling pathway via JAK-STAT	95	0.368606	1.46099	0.00394435	0.0439774	0.0375948	976	tags=21%, list=7%, signal=20%	Bcl3/Lif/Hmga2/Socs3/Stat2/Parp14/Agap2/Il6ra/Parp9/Cav1/Gadd45a/Stat1/Ephb2/Ptprc/Camk2a/Socs1/Clcf1/Stat3/Tnfrsf1a/Cyp1b1
GO:0014896	muscle hypertrophy	91	-0.518397	-1.56967	0.00398684	0.0443578	0.0379199	3871	tags=44%, list=28%, signal=32%	Rbm10/Akap6/Sirt1/Pdlim5/Pak1/Mtor/Foxo1/Ppp3ca/Zfp418/Rap1gds1/Meis1/Tomm70a/Rock1/Gsk3b/Sorbs2/Yy1/Igfbp5/Klf15/Akap1/Ep300/Map2k4/Atp2a2/Adcy10/Mef2a/Ece1/Adra1b/Ttn/Mef2c/Igf1/Fbxo32/Myh6/Nr3c1/Pde9a/Ppara/Smad4/Ctdp1/Ptk2/Myoc/Jarid2/Adra1a
GO:1902004	positive regulation of amyloid-beta formation	17	-0.72706	-1.69329	0.00418763	0.0459166	0.0392525	993	tags=24%, list=7%, signal=22%	Epha4/Picalm/Slc2a13/Chrna7
GO:0006813	potassium ion transport	159	-0.453875	-1.44597	0.00433574	0.0470535	0.0402244	2318	tags=23%, list=17%, signal=20%	Kcnk10/Nedd4l/Kcnn1/Cdkn1b/Cpox/Kcnj13/Gnaq/Vps4b/Large1/Abcc8/Nsf/Akap9/Dlg1/Slc9a9/Slc9a7/Kcnn3/Akap7/Fxyd4/Klhl24/Hbp1/Kcnc4/Slc12a6/Nr3c2/Kcnq3/Pkd2/Kcnv1/Wnk2/Kcnmb2/Kcna2/Kcnn2/Crbn/Slc24a3/Kcnk2/Kcnd2/Kcnj3/Kcnma1/Stk39
GO:0007215	glutamate receptor signaling pathway	44	-0.579655	-1.59854	0.00440477	0.0476391	0.0407251	1892	tags=25%, list=14%, signal=22%	Gnaq/Homer1/Grm3/Grin2b/Plp1/Grin2c/Gria2/Plcb1/Kalrn/Grin3a/Cpeb4
GO:0032736	positive regulation of interleukin-13 production	15	0.68919	1.87532	0.00458772	0.0491833	0.0420451	1017	tags=47%, list=7%, signal=43%	H2-Q4/H2-Q7/H2-T22/H2-D1/H2-T23/Tlr4/H2-K1
GO:0060080	inhibitory postsynaptic potential	17	-0.723687	-1.68543	0.00462334	0.0493657	0.0422011	957	tags=24%, list=7%, signal=22%	Unc13b/Nlgn3/Rims2/Grik2
GO:0019226	transmission of nerve impulse	69	-0.534139	-1.57503	0.00464202	0.0493657	0.0422011	1007	tags=19%, list=7%, signal=18%	Kcnc4/Gpr35/Myh14/Ntrk3/Kcnq3/Fgf12/Clcn1/Kcnmb2/Kcna2/Kcnd2/Chrna7/Kcnma1/Grik2
GO:1990266	neutrophil migration	57	0.444105	1.61287	0.00469317	0.0498097	0.0425806	1456	tags=28%, list=10%, signal=25%	Il1r1/Csf3r/Itga1/Ppia/Lgals3/Itgam/Spp1/Fcer1g/Wdr1/Rac3/Dysf/Cd74/Mdk/Selenok/Ppib/Cxcl5
