# Supplementary material for: Aging potentiates glioma-driven remodeling of cortico-hippocampal neuron-astrocyte dynamics
Source: Research Square preprint supplement (doi:10.21203/rs.3.rs-8725420/v1), 2026-02-11
Supplement: Supplementary file 8 [file f47929559fd850fa99d15de0.xlsx]

## Sheet: mPFC_ExcitatoryNeuron_YTvYC
gene	logFC_groupYoung_Tumor	FDR_groupYoung_Tumor
C030029H02Rik	-1.79841	1.32e-06
Ifi44	5.79931	2.51e-06
Olfr464	-1.61907	0.0364494
G530011O06Rik	-1.50337	0.00371291
Gm15247	-1.18916	0.0292418
Opalin	-1.17665	0.00512035
Aspa	-1.14599	0.0313916
A230001M10Rik	-1.13415	5e-05
Ifi207	4.70813	0.000479774
Gm19500	-1.10255	0.0299446
4930556I23Rik	-1.09654	2.28e-06
Bace2	-1.05559	0.00793248
Irgc1	-1.04573	0.00210506
Fgf1	-1.04148	0.0234689
Oasl2	4.66115	1.7e-07
Fam160a1	-1.01193	0.000737462
Hunk	-0.993152	0.000622317
Samd3	-0.992047	0.000651943
Gm30313	-0.981031	0.00112245
Pde6c	-0.969865	0.0030233
Frzb	-0.96962	0.0233215
Pcdh20	-0.951749	0.00757235
Samd13	-0.93928	0.00945269
4930488N15Rik	-0.938477	0.000103541
4930548K13Rik	-0.921589	0.00041098
Gm5546	-0.912325	3.08e-07
A2m	4.38133	1.12e-10
Insc	-0.901043	0.0294744
Iigp1	4.35393	0.000156917
Gm4951	4.15672	9.21e-06
1700016K19Rik	-0.89552	0.0294305
Gask1b	-0.887392	5.35e-06
Gm14461	-0.886321	0.000557222
Baz1a	-0.883488	0.025156
Rassf3	-0.878197	0.012917
Usp18	4.12053	2.29e-06
Htr1a	-0.877397	0.0332406
Ifi204	4.11955	3.15e-05
Chgb	-0.872984	0.0492397
Gm15046	-0.8706	1.16e-07
Lmcd1	-0.861673	0.0237166
Ifi27l2a	3.9787	0.00024584
Kctd15	-0.861647	0.0015842
Asb11	-0.860003	0.000859424
Krt20	-0.857153	0.0442479
Gm47450	-0.852133	0.00045106
Pip5k1bos	-0.84346	0.0491886
Gm13067	-0.839163	0.0016168
Gm15893	-0.83897	0.01609
5930438M14Rik	-0.833204	0.000609871
F830016B08Rik	3.86926	0.00512035
Gm40418	-0.820139	0.007642
Pth2r	-0.814524	0.0194986
Gm34794	-0.813359	1.03e-05
Gm29695	-0.812986	0.0138109
Prr5l	-0.81236	0.0360733
Lgi2	-0.812308	0.0043626
Plekhg3	-0.810726	0.0359961
Myh2	-0.806742	0.00213477
Olfr78	-0.804263	0.0011091
Gbp3	3.78023	0.00028983
Gm32081	-0.801628	0.0011273
Gm34721	-0.800318	8.88e-06
Arr3	-0.798128	0.0333832
Gm49415	-0.792938	0.0227176
Gadl1	-0.790921	0.00564571
Gpr88	-0.789618	0.0154397
Gfpt2	-0.786888	0.00112245
C130074G19Rik	-0.784784	0.000267922
Arhgap6	-0.783704	0.000137415
9230109A22Rik	-0.779524	0.00233577
Gucy2g	-0.771031	0.00718192
Rflnb	-0.770348	0.0172875
Gm765	-0.770314	0.000687188
Pcsk9	-0.769723	0.00764478
Plp1	-0.7665	0.0397971
Gm27151	-0.765552	0.0230979
Macc1	-0.7614	0.0451555
Phf11d	3.69475	0.00041098
Gm29453	-0.756058	0.00168141
Gm50115	-0.754963	0.0142987
Pcdhga8	-0.752444	5.25e-05
Gm42825	-0.752382	0.0459305
Gm29055	-0.751891	3.21e-08
Hs3st3a1	-0.751701	0.01609
Mlip	-0.750184	0.000267922
Tmem114	-0.746581	0.0290174
Trim71	-0.743099	0.0285466
Olfr560	-0.7331	0.00921788
Chrnb3	-0.718209	0.000859424
Nectin3	-0.71579	0.00117531
1700041M19Rik	-0.715432	0.0117291
Tmem35a	-0.7117	0.0143323
Ccl12	3.46674	0.000858731
Marchf10	-0.709617	1.7e-07
Gad1	-0.704061	0.0212706
Itgb8	-0.703887	0.000603137
Kbtbd12	-0.702862	0.000888751
Zar1l	-0.702333	0.000942278
Sox2ot	-0.69823	0.00384659
Gm14546	-0.695948	0.0144503
Gm44698	-0.691607	4.26e-05
Ism1	-0.688345	0.00935042
Bhlha9	-0.687156	0.0219274
Oas1a	3.42306	0.0176135
Ddx60	3.19627	3.23e-06
Bloc1s5	-0.686703	0.000557222
C7	-0.685105	0.00583966
Kcns1	-0.682953	0.0185063
Gad2	-0.679045	0.000926196
Nptxr	-0.674056	0.0038028
Gm39185	-0.663943	0.0118401
Bst2	3.18439	0.00102397
Tmem74b	-0.663243	0.000468266
Nrep	-0.662386	0.000557222
9030624G23Rik	-0.657593	0.00175493
Gm12371	-0.655163	0.00085509
Stard4	-0.655016	0.0164627
Vgll4	-0.654503	0.00118561
Lrp4	-0.653588	0.0132323
Gm34788	-0.651632	0.00711524
Myhas	-0.648475	0.00263985
Allc	-0.648362	0.000713066
Syde2	-0.644584	5.94e-08
Aldh1a1	-0.644495	0.030573
Gm15942	-0.642957	0.0451415
Mas1	-0.640524	0.00356598
Gm38575	-0.639758	0.0249726
Ptchd4	-0.639217	0.0394368
Gm15997	-0.63557	0.00555741
Trim34a	3.09851	0.00102723
Gm35394	-0.635241	0.00307652
Fap	-0.63442	0.000557222
Gm19585	-0.631157	0.00512035
Gpc4	-0.630954	0.00793248
Neu2	-0.629432	0.00832511
AI593442	-0.625279	0.00413063
Gm14344	-0.624942	0.00793248
C530025M09Rik	-0.624836	0.0368635
Slitrk4	-0.622854	0.000693771
Naf1	-0.622197	0.00030294
Kcng2	-0.621981	0.000394334
Gm5784	-0.621358	0.00732751
Gm42775	-0.620653	0.00146219
2410018L13Rik	-0.62024	0.0172875
Gm50410	-0.619374	0.0143277
Hmgcs1	-0.615759	0.0423178
9330188P03Rik	-0.614756	0.00231695
Kcnv1	-0.614524	4.54e-07
Gm12930	-0.613249	0.0195962
Efemp1	-0.61191	0.00780364
Gm31946	-0.611386	2e-06
E2f7	-0.611127	0.0146675
Heg1	-0.610028	0.00186237
Kcnj4	-0.609179	0.00553576
4930405D11Rik	-0.608105	0.0219274
Rsad2	3.09145	0.00220896
Pcdhga10	-0.60707	0.000156917
Gbp6	2.84437	0.00282065
Gucy1a1	-0.604143	0.00366755
Ifit1	2.83648	0.00583966
Gm3510	-0.603557	0.00024867
Irf7	2.77541	0.000830441
H2-Q7	2.75088	0.00598238
Smco4	-0.59844	0.0387579
Siae	-0.594915	0.000410829
Hs3st1	-0.593446	0.0373478
Usp43	-0.591808	0.00856537
Marchf2	-0.591045	0.000351985
2310067P03Rik	-0.591033	0.00302297
Qpct	-0.590085	0.00495723
Gm30835	-0.588796	0.0413904
Vim	2.59684	0.00583966
Slitrk2	-0.588611	0.0361065
Cftr	-0.588295	0.0194547
Gm28055	-0.587171	0.0313916
Tnxb	-0.585955	0.0322872
Rnf144b	-0.58484	0.0373365
Ccl28	-0.581601	0.00276693
Ntf3	-0.581208	0.044628
Gm12992	-0.578526	0.00034847
Gm13990	-0.576156	0.0480277
Gm42700	-0.575541	0.000977733
Gm29676	-0.574317	0.0362789
Gm49912	-0.5729	0.0212518
Gm9754	-0.568276	0.0407129
Ogfod3	-0.566698	0.0140032
Gm29069	-0.563278	0.0344911
Gm15902	-0.561248	0.0173277
A830036E02Rik	-0.557486	0.000778289
Dcdc2c	-0.557009	0.0208744
Rnf144a	-0.55628	0.00583966
Scd4	-0.554006	0.033474
Slc13a5	-0.553541	0.0245228
C4b	2.52722	1.84e-08
Gm20559	2.49251	0.00598238
Col5a3	2.45856	0.012039
Gm31592	-0.553085	0.0115456
4930519K11Rik	-0.548626	0.00414381
Gm32817	-0.548324	0.0313802
Grm3	-0.547394	0.00413063
Oprk1	-0.547171	0.0234689
Sgtb	-0.544248	0.00160467
Gm50304	-0.544025	0.00777057
Sowaha	-0.542978	0.00210506
Rbm20	-0.542973	0.000197623
Atp1a1	-0.540095	0.0200411
Pcdhga5	-0.53826	0.00307652
2610307P16Rik	-0.535291	0.0409347
Gm15663	-0.534486	0.0220811
Trim7	-0.53335	0.00660127
A230083G16Rik	-0.532871	0.00946483
Myo1b	-0.532411	0.007642
Itprid1	-0.531403	0.0434789
Rasgef1c	-0.530787	0.00291062
Shisa6	-0.53067	2.51e-06
Gm31513	-0.530249	0.0364972
Gbp7	2.42669	0.00169442
Gfap	2.40756	1.16e-07
Col24a1	-0.528417	0.0311425
Gm29340	-0.527624	0.0395183
Gm13814	-0.527109	0.0318346
Itga4	-0.525352	0.00384659
Hmcn2	2.38954	0.012612
9630001P10Rik	-0.524512	0.0263068
Gm26974	-0.524273	0.000937987
Uba7	2.32993	0.00208961
Gpr26	-0.524025	0.0011091
Gm49932	-0.523984	0.0292418
Gm36287	-0.523984	0.0425729
Alg10b	-0.52173	0.0132286
Tcfl5	-0.520727	0.0212706
Tap1	2.28039	0.00200382
Gm32027	-0.520392	0.007642
Pcdha9	-0.519813	0.000963937
Ifit3	2.2791	0.00790667
Nlrc5	2.27777	0.0115632
Slco2a1	-0.5172	0.0219814
Acsl3	-0.516285	0.0270901
Prickle3	-0.515811	0.00160467
Hecw2	-0.515066	0.00832511
Apobec1	2.21044	0.0158276
Tekt5	-0.514971	0.0378879
Gm26621	-0.513679	0.000609871
Gm15246	-0.513254	0.000557222
Gm15411	-0.513222	0.00727044
Cyp39a1	-0.51287	0.0122977
Serpina3n	2.13616	0.00498043
Map3k21	-0.507792	0.000250856
Glra2	-0.506111	0.0232779
Gm14317	-0.506083	0.0318346
Pcdhga11	-0.505962	0.0220811
9430041J12Rik	-0.505821	0.00288309
Kcnk4	-0.50392	0.00303079
Gm8098	-0.503904	0.0429035
Gm11867	-0.503691	0.0313802
9530036O11Rik	-0.502022	0.000224359
Mypn	-0.501711	0.00583966
Dcx	-0.500111	0.00192088
A830052D11Rik	-0.499789	0.00144875
Eva1c	-0.499666	0.0311146
Ptpn21	-0.498654	0.0051409
Ppef1	-0.49787	0.0146446
Gm10754	-0.495696	0.00390649
Lgals3bp	2.08486	0.000197623
Stard8	-0.493576	0.00512035
Wdr95	-0.493298	0.00216173
Gm47664	-0.49305	8.88e-06
Ocln	-0.49061	0.0400622
2600014E21Rik	-0.489947	0.00102397
Ppm1k	-0.487804	2.51e-06
H2-K1	2.05937	0.00248105
Tbc1d30	-0.486763	0.0236066
Sypl2	-0.485707	0.0225826
Enpp2	-0.484844	0.0043626
Nova1	-0.48368	2.26e-05
Cdk5r1	-0.482963	0.0043626
Rad54l	-0.482346	0.0364972
Pcdha1	-0.482115	0.0313802
Myh7b	-0.479659	1.32e-06
Plag1	-0.478416	0.0172875
Slc27a2	-0.477993	0.00205594
Efcc1	-0.477811	0.00413063
Ptpn20	-0.477732	0.0284798
Slc17a6	-0.476923	0.0440908
Arhgap10	-0.476566	0.0457324
Stxbp6	-0.476236	0.01609
Coch	-0.476231	0.0358702
Rgs12	-0.474931	0.0198699
Gm20692	-0.474206	0.0471042
9530097N15Rik	-0.473399	0.000267922
Akap5	-0.472221	0.00793248
Gm47760	-0.469246	0.0349828
Wdr17	-0.469039	0.00210506
Arap2	-0.468273	0.0238447
Pank1	-0.468273	0.007642
Ccnb1	-0.468216	0.0454293
Clca3a1	-0.46758	0.00144875
Sp4	-0.466754	0.01609
Ndrg3	-0.465898	0.00583966
Plppr1	-0.464519	0.0400622
Zfp951	-0.464059	0.000609871
Rabl3	-0.463909	0.00371291
Prcp	-0.463594	0.0235947
Gm28140	-0.463476	0.0219274
Fcgr2b	2.0392	0.01609
Gm4876	-0.463315	0.0258931
4921539H07Rik	-0.462281	0.000339604
Chml	-0.462167	0.0317164
Gm34983	-0.461531	0.0335175
Tnfrsf11a	-0.461318	0.0200836
Mkx	-0.460483	0.0234689
Abcc8	-0.460455	0.0227176
Gm15155	-0.458051	0.0140032
Scn4b	-0.457824	0.0159088
Frrs1l	-0.457725	0.00116723
Ppp1r3d	-0.455827	0.0011091
Gm2824	-0.454935	0.000977426
Ntn4	-0.45439	0.00355332
Gm11973	-0.45408	0.0383043
Gm38563	-0.453925	0.030573
Ankrd31	-0.453213	0.0219274
Oas2	2.02102	0.00841872
2900045O20Rik	-0.452924	0.01609
Gpr12	-0.452243	0.00322793
Slc14a1	1.94066	0.01609
Zfp879	-0.451246	0.0234689
Gm12296	-0.45057	0.0453974
Gm3279	-0.449736	8.26e-06
Trim25	1.91947	0.00321708
Serping1	1.86386	0.0301442
Lrrc55	-0.4484	0.0391009
Eif2ak2	1.83211	0.0245032
Tmem196	-0.447485	0.000977426
Phldb2	-0.446573	0.00144875
Daglb	-0.444399	0.0482598
Diras2	-0.443561	0.0133895
Slc4a4	-0.443434	0.0409347
Gabra2	-0.44218	0.00355332
Mfsd4a	-0.441974	0.0363059
Synm	-0.440665	0.00118382
Kcnj11	-0.440306	4.03e-05
Usp3	-0.440276	0.00306268
Trim30d	1.74629	0.0364494
Gm26861	-0.439783	0.0227176
4930592A05Rik	-0.439476	0.0476174
Ckap4	-0.43853	0.0313916
Dleu2	-0.438233	0.0285466
Kcnj9	-0.437153	0.0364494
Six4	-0.436364	0.00240804
Yap1	-0.435949	0.0314555
Mars2	-0.4348	0.0463931
Rasd2	-0.434775	0.0200411
Gabra4	-0.433958	0.0012125
Gabrg2	-0.433247	0.00102723
Col19a1	-0.432662	0.0309232
Jcad	-0.432425	0.0246973
2310026I22Rik	-0.432366	0.0336034
Adam23	-0.431771	0.0247227
9130227L01Rik	-0.430812	0.00763674
Cep70	-0.429348	0.00562375
Cemip2	-0.428142	0.0138109
Mal2	-0.427533	0.0313916
Pld4	1.67286	0.00273989
Cd74	1.66267	0.0368635
Igfbp2	1.61977	0.0364494
Slc35g1	-0.427343	0.0357017
Fam184b	-0.42696	0.0375721
R3hdm1	-0.425845	0.0225826
Kcnj3	-0.425553	0.0344911
Man2a1	-0.424841	0.0409347
D6Ertd474e	-0.423962	0.025959
Gm20063	-0.423377	0.00698855
Gm43573	-0.422728	0.00524734
Gm20125	-0.422699	0.0220811
Elmo1	-0.421822	0.0459195
Ttl	-0.42035	0.025156
Ppme1	-0.418997	0.0262225
Gm36251	-0.418634	0.000737462
Nxf7	-0.418464	0.0043626
Cdkl5	-0.417021	0.00414381
Gm49685	-0.416414	0.000351985
Fgf9	-0.416412	0.00233577
Rtkn2	-0.416081	0.0350374
Gm48420	-0.415527	0.0315351
Gda	-0.414545	0.0200836
Rab40b	-0.413011	0.0219274
Gm26801	-0.412413	0.00291062
Vwa3a	-0.411748	0.0156023
Cttnbp2	-0.410121	0.0395183
Rasa2	-0.408714	0.0315351
Ifi35	1.60226	0.0192972
Slc26a8	-0.408707	0.0240504
Lin7a	-0.408408	0.00478238
Plaat1	-0.408396	0.0204976
Gm48693	-0.408053	0.0415266
Hace1	-0.406513	0.0142048
4930414F18Rik	-0.406482	0.0387579
Gabra1	-0.40597	0.0111102
Iqcm	-0.405863	0.00956113
Nbn	-0.405577	0.0299446
Spcs3	-0.403426	0.0249224
9330158H04Rik	-0.403048	3.98e-05
Stat1	1.51642	0.0153733
Lrrc6	-0.402301	0.0200675
Fancm	-0.401877	0.0308413
Gm16998	-0.401726	0.0323983
Pkib	-0.401658	0.00307652
Aldh1l1	-0.400243	0.000486697
Spdya	-0.399523	0.0144503
Acr	-0.399276	0.00024584
Gm29443	-0.398603	0.0146446
Tmod1	-0.397942	0.0412454
Gm49602	-0.397725	0.0272795
Asph	-0.397332	0.0318906
Ppm1l	-0.39684	0.0313802
Tjp2	-0.396394	0.00737672
Htr7	-0.394895	0.0156023
Fancb	-0.393673	0.0402265
Nwd2	-0.393483	0.0378879
4930447C04Rik	-0.393193	0.011394
Dmrtc1a	-0.39196	0.00219593
Ifih1	1.51494	0.0485953
Gucy1b1	-0.390108	0.0441456
Syk	-0.389509	0.00159802
Gm36640	-0.388424	0.0025607
Sept6	-0.387755	0.00102723
Kcnip1	-0.387676	0.000737462
L3mbtl3	-0.387167	0.00956113
Gpm6a	-0.386728	0.00640909
Chrna4	-0.386524	0.0114538
Sytl2	-0.386057	0.00105789
Rtp4	1.43121	0.0294744
Naip5	1.35666	0.0451415
Ttll7	-0.38557	0.0485953
Ccdc172	-0.384866	0.0467605
Cd83	-0.384238	0.00478238
Cpeb2	-0.383118	0.0166936
Cdc42se2	-0.38165	0.01609
D1Ertd622e	-0.381405	0.0472361
Fbxl4	-0.380095	0.0237166
Rras2	-0.379652	0.0294744
Golim4	-0.379101	0.0292418
Ccdc177	-0.375069	0.0348909
Cep63	-0.374417	0.0151537
Adss	-0.374321	0.0150743
Megf9	-0.373952	0.0223261
Gm15581	-0.372358	0.0160402
Fbxl5	-0.372136	0.0292453
Vstm2l	-0.372095	0.0448224
Ifnlr1	1.28154	0.0318346
Acaa1b	1.25763	0.0402265
Gatm	-0.371897	0.0295623
Ifi30	1.00291	0.033474
Pbxip1	0.857155	0.0388669
Lmtk2	-0.370575	0.0423178
Lancl2	-0.368318	0.00030294
Spint2	-0.366889	0.033038
Kcnt2	-0.366532	0.0453865
Gm42161	-0.366189	0.0409347
BC005561	-0.365224	0.0441665
Scn1a	-0.363961	0.0202315
Arhgef9	-0.361591	0.0313916
Osbpl1a	-0.361513	0.0142987
4930447F24Rik	-0.360891	0.0167632
Fcho1	-0.360492	0.0197178
Naprt	0.784965	0.0345015
Emx1	-0.360206	0.0318346
Ankrd28	-0.359662	0.0487391
Cntln	-0.359577	0.0402265
Cd2ap	-0.358805	0.0208205
Kdm4d	-0.358338	0.0308413
Gm17066	-0.35815	0.00442185
Gtdc1	-0.357645	0.0385626
4930417H01Rik	-0.357278	0.00727044
Mcc	-0.357046	0.0316687
2310002D06Rik	-0.356242	0.00169368
Myo5c	-0.356002	0.0368635
Tmlhe	-0.355936	0.0240504
Tlk1	-0.35151	0.0111102
Scn2a	-0.351051	0.0149534
1700001L05Rik	-0.350358	0.0204976
Zbtb14	-0.350353	0.00498043
Slitrk3	-0.350098	0.0351418
Elavl2	-0.348622	0.0290174
Fam3c	-0.347244	0.0208205
Zfp518a	-0.347174	0.0163933
Guf1	-0.34573	0.00647718
Fgfrl1	0.729336	0.00989266
B230312C02Rik	0.690059	0.0315351
Alkal1	0.603732	0.0320972
Tbx6	0.597116	0.0375721
Pcdhga7	-0.345272	0.00219593
Masp1	0.559502	0.0409347
Actr3b	-0.345083	0.0397971
Tmem62	-0.343433	0.0301553
Scg5	-0.340862	0.0298916
Dph6	-0.340229	0.0363444
Fbxw7	-0.338411	0.00418463
Gm47591	-0.335529	0.0482598
Gm16145	-0.335149	0.0143681
Pde8b	-0.332968	0.0397971
9330182L06Rik	-0.332262	0.007642
4930534D22Rik	-0.331028	0.031731
Pla2g4b	0.52797	0.0263068
Adamts2	0.509023	0.0362332
Gm38413	-0.331022	0.0129189
9330162012Rik	-0.327071	0.01609
Dpy19l1	-0.326907	0.0236066
Dtwd2	-0.326764	0.00422715
Akap7	-0.32506	0.0140032
Ofd1	-0.321307	0.0488078
Fam228b	-0.321288	0.0416893
Zfp281	-0.319596	0.00371881
St6gal2	-0.316165	0.038382
Ing2	-0.316054	0.0423178
Susd5	-0.31592	0.00793248
Lgr4	-0.315103	0.0183084
Nptn	-0.314525	0.0467373
Lrrn3	-0.311553	0.0133705
Gm21691	-0.311128	0.0446575
AC142100.1	-0.308854	0.0026423
Tcf12	-0.306019	0.0492054
A630089N07Rik	-0.304863	0.044428
Lix1	-0.304489	0.00418923
Mtf2	-0.302932	0.0378879
Nsun3	-0.302673	0.0323008
Cyp7b1	-0.30013	0.000859424
Slc12a5	-0.298103	0.0314238
Pcsk2	-0.294924	0.0423178
Gatb	-0.294555	0.0212551
Mblac2	-0.293519	0.0276935
Zfp81	-0.290212	0.0294744
Unc13c	-0.288331	0.0295623
Ppa2	-0.283353	0.0387579
Shroom1	-0.277063	0.0309147
Flrt1	-0.27643	0.0258931
Gm21781	-0.274138	0.00643304
Mex3b	-0.272703	0.0225826
Gm48957	-0.271701	0.0488816
Kazn	-0.268889	0.00803097
Elmod1	-0.266619	0.0380428
Slc35b4	-0.238733	0.0285466
Wdr54	-0.231425	0.0412454
Dazl	-0.230658	0.00583966
Mospd3	-0.208718	0.0315351
Nxt2	-0.201306	0.0451555

## Sheet: mPFC_ExcitatoryNeuron_ATvAC
gene	logFC_groupAged_Tumor	FDR_groupAged_Tumor
Gm1992	-1.03962	0.0340747
Gm19938	-0.439687	0.0175887
Gm16041	-1.44254	0.0101781
Atp6v1h	-0.476522	0.0139936
Oprk1	-0.469378	0.0131321
Rb1cc1	-0.414741	0.00678785
St18	-1.15684	9.11e-05
Pcmtd1	-0.484416	0.00478493
Sntg1	-0.349038	0.00818615
Adhfe1	-0.525009	0.0401585
2610203C22Rik	-1.31681	0.00248089
Vxn	-0.51013	0.000737967
Mybl1	-0.538465	0.0153603
Vcpip1	-0.402535	0.0203035
Sgk3	-0.3748	0.00465048
Ppp1r42	-0.600362	0.00022888
Cspp1	-0.492365	0.000213844
Arfgef1	-0.497158	0.000797454
Cpa6	-0.43484	0.00875383
Prex2	-0.44646	0.0137288
Slco5a1	-0.355023	0.0425091
Ncoa2	-0.394768	0.00365449
Gm29570	-0.570591	0.00952571
Tram1	-0.461648	0.00251671
Lactb2	-0.338689	0.027767
Gm9947	-0.398095	0.00797346
Kcnb2	-0.347644	0.016289
Terf1	-0.412558	0.0179124
Sbspon	-1.27669	0.0076724
Gm28095	-0.896733	0.035282
Stau2	-0.36952	0.0129192
Gm7568	-0.922429	0.0307817
Ube2w	-0.421185	0.00436966
Tmem70	-0.581034	0.0246496
Gm28376	-1.08436	0.045296
Jph1	-0.381162	0.0101081
Gdap1	-0.402081	0.00671872
Gm28756	-0.35229	0.0113789
4930486I03Rik	-0.974359	0.00301559
Paqr8	-0.521051	0.0147888
Efhc1	-0.651445	0.0100087
Gsta3	-0.544533	0.003473
Kcnq5	-0.433195	0.00193438
Rims1	-0.456144	0.00291845
Gm29506	-0.726555	0.019787
Ogfrl1	-0.504286	0.00219855
B3gat2	-0.903577	0.0238477
Smap1	-0.469998	0.00089135
Fam135a	-0.512692	0.00607906
Col9a1	-1.32559	0.00167173
Col19a1	-0.489365	0.00154815
Lmbrd1	-0.492196	6.43e-05
Adgrb3	-0.403876	0.00260197
Phf3	-0.501323	0.00446173
Khdrbs2	-0.284169	0.0192174
Prim2	-0.359041	0.0281445
Rab23	-0.421908	0.0479593
Zfp451	-0.50489	0.0017253
Bend6	-0.439843	5.34e-05
Dst	-0.33195	0.0142913
Ccdc115	-0.477953	0.0485225
Gm38336	-0.879147	0.0137182
Fam168b	-0.56163	0.0276443
Plekhb2	-0.519624	0.0183897
Uggt1	-0.348225	0.0184109
Kansl3	-0.308722	0.0161206
Cnnm4	-0.45472	0.0109629
Gm38033	-0.950218	0.0159111
D430040D24Rik	-0.679015	0.00710623
4933424G06Rik	-0.870147	0.00844116
Tmem131	-0.371695	0.0037581
Gm38115	-0.545148	0.00119408
Vwa3b	-0.640327	0.0103731
Inpp4a	-0.334394	0.0377354
4930439A04Rik	-1.68743	0.000783724
Mgat4a	-0.337686	0.0260096
2010300C02Rik	-0.44986	0.0155789
4930556I23Rik	-1.08504	0.000136162
Tsga10	-0.346908	0.0258637
Gm26805	-0.673816	0.000243135
Lipt1	-0.440902	0.0153787
Eif5b	-0.288228	0.0355829
Rev1	-0.311646	0.0415148
Gm16150	-1.09266	0.0194679
Gm16151	-1.2815	0.0103465
Lonrf2	-0.521249	0.0035299
Pdcl3	-0.525774	0.0260027
Npas2	-0.468303	0.0060209
Tbc1d8	-0.35428	0.0181229
Creg2	-0.540548	0.00578129
D930019O06Rik	-0.360733	0.0289626
Map4k4	-0.307519	0.0335367
Il1r2	-0.938342	0.0216025
Gm29260	-1.17542	0.00606128
Gm28175	-0.381444	0.00301652
Gm28140	-0.699141	0.0019147
Pantr1	-0.290246	0.0235279
Gm20646	-0.489498	0.00169861
Pou3f3	-0.51621	0.00204183
Pantr2	-1.10392	0.00340369
Dalir	-0.457347	0.0107268
Mrps9	-0.406073	0.00364627
Gpr45	-0.323458	0.0356392
Tgfbrap1	-0.376333	0.0174855
AI597479	-0.488867	0.00853538
Gm29155	-0.510224	0.00554578
Uxs1	-0.553866	0.000290493
Tpp2	-0.411498	0.00963469
Poglut2	-0.403567	0.0181327
Bivm	-0.484152	0.00731038
Ercc5	-0.408304	0.0205548
Gulp1	-0.796036	0.00021481
Wdr75	-0.418288	0.0179557
Dnah7c	-0.364164	0.00631265
Slc39a10	-0.418889	0.0107909
Gm28319	-1.1064	0.0274414
9330175M20Rik	-0.783013	0.00740605
Gm28055	-0.700714	0.000514349
Myo1b	-0.677287	3.91e-05
Gm29453	-0.449645	0.0102013
Stat4	-0.362467	0.0491109
Gm31812	-0.919356	0.0246586
Stat1	1.76149	0.000425938
Gls	-0.594326	5.08e-05
Nab1	-0.588427	2.77e-05
Gm553	-0.849631	0.000228895
Mfsd6	-0.42456	0.00281184
Gm29670	-0.601617	0.00416876
Inpp1	-0.448818	0.00701194
Hibch	-0.588855	0.0101561
Pms1	-0.414351	0.0136015
Ormdl1	-0.676525	0.0141146
Osgepl1	-0.470533	0.0153603
Asnsd1	-0.445185	0.0261497
Hecw2	-0.656673	4.33e-05
Gtf3c3	-0.4027	0.00453467
Pgap1	-0.568208	5.07e-05
Ankrd44	-0.539182	0.000948864
4930444A19Rik	-1.36704	0.00324527
Sf3b1	-0.433005	0.00033551
Hspd1	-0.420376	0.034621
Rftn2	-1.00107	0.00861525
Mars2	-0.641518	0.000126814
9130227L01Rik	-0.695669	1.19e-06
Satb2	-0.409446	0.00919189
9130024F11Rik	-0.563551	1.23e-05
1700066M21Rik	-0.342689	0.0122059
Spats2l	-0.324698	0.0277164
Kctd18	-0.473626	0.0422683
Bzw1	-0.485847	0.0458846
Orc2	-0.480961	0.00321744
Gm15834	-0.515997	0.0192562
Fam126b	-0.460119	0.0116009
Stradb	-0.486356	0.000315529
Als2	-0.331866	0.0401585
Gm973	-0.801297	0.0318243
Sumo1	-0.349529	0.0345309
Nop58	-0.399677	0.0062951
Bmpr2	-0.302251	0.0441411
Fam117b	-0.418477	0.0171813
Ica1l	-0.410478	0.00309615
Carf	-0.415012	0.0033623
Nbeal1	-0.434193	0.00367424
Abi2	-0.476263	0.00204183
Raph1	-0.416724	0.00937416
Ctla4	-0.663397	0.000402719
Nrp2	-0.405782	0.020165
Ino80d	-0.393038	0.00194903
Ndufs1	-0.381883	0.0228523
Zdbf2	-0.710891	0.00245336
Adam23	-0.692444	3.43e-06
4933402D24Rik	-0.986477	0.0372497
Klf7	-0.315382	0.0240272
Gm13748	-1.33892	0.0092709
Creb1	-0.371036	0.0136189
Mettl21a	-0.4806	0.0217635
Ccnyl1	-0.599655	0.0011302
Plekhm3	-0.380733	0.0134215
Pikfyve	-0.44752	0.00189706
Pth2r	-0.748695	0.00621579
Map2	-0.436341	0.00495179
Gm10558	-1.46444	0.0136398
Unc80	-0.469256	0.00028605
Rpe	-0.424065	0.00537038
Kansl1l	-0.670248	0.0261689
Lancl1	-0.416822	0.000148568
Vwc2l	-0.34194	0.0451704
Atic	-0.349432	0.0249887
Mreg	-0.344174	0.0351453
Xrcc5	-0.462647	0.00107353
Arpc2	-0.473511	0.020577
Pnkd	-0.389255	0.00260197
Tmbim1	-0.940574	0.0147865
Gm29358	-0.858767	0.00010529
Usp37	-0.419008	0.0275559
Glb1l	-0.335542	0.0113879
Ptprn	-0.407084	0.0092217
Gm28294	-0.589022	0.0364805
Gm15178	-1.50305	0.00132429
Obsl1	-0.394374	0.0362612
Gm29069	-0.658385	0.00129928
Gm17751	-0.721536	0.0010273
Gm816	-1.78208	2.35e-06
Epha4	-0.319366	0.0251783
Farsb	-0.500629	0.000942251
Acsl3	-0.700634	0.000117692
Utp14b	-0.679983	0.00572914
Cul3	-0.457071	0.00451234
Dock10	-0.358182	0.0286352
Nyap2	-0.444809	0.000512164
Irs1	-0.488379	2.72e-05
Rhbdd1	-0.48229	0.00468046
Col4a4	-0.888797	0.0428046
Col4a3	-0.893233	0.00588439
Mff	-0.532566	0.000660592
Gm28941	-0.558384	0.0216557
Agfg1	-0.403052	0.00843312
Sphkap	-0.324407	0.0404662
Trip12	-0.364824	0.0075969
Fbxo36	-0.337963	0.0245601
Sp100	1.80668	0.00531216
Cab39	-0.567595	0.000409584
Gpr55	-0.923261	0.0188328
Psmd1	-0.419929	0.0168694
Htr2b	-1.23057	0.0203191
Ncl	-0.391875	0.00693125
Dis3l2	-0.408621	0.0016717
Gm28375	-0.983744	0.0183316
Ecel1	2.19965	0.00103445
Gigyf2	-0.441896	0.0020403
Kcnj13	-1.75419	0.0017253
Snorc	-0.975458	0.00785482
Ngef	-0.372788	0.0127612
Neu2	-0.664615	0.000734472
Atg16l1	-0.428844	0.00133096
Dgkd	-0.424486	0.00390391
Usp40	-0.306839	0.0357575
Sh3bp4	-0.591611	0.0177503
4933400F21Rik	-1.19664	0.00490458
Lrrfip1	-0.41673	0.00440043
Ramp1	-0.359657	0.0127035
Ube2f	-0.511336	0.00340339
Scly	-0.504476	0.00250471
Gm17090	-1.00715	0.0449676
Erfe	-1.52608	1.68e-06
Ilkap	-0.428114	0.00691747
Traf3ip1	-0.545478	0.000215509
Twist2	-0.463063	0.00546026
Gm29481	-0.834142	0.0345053
Ankmy1	-0.539179	0.0350874
Sned1	-1.01865	0.0061324
Ppp1r7	-0.449421	0.00326896
Hdlbp	-0.396842	0.00307784
Thap4	-0.373039	0.0259888
Gm10550	-1.01317	0.0200882
Atg4b	-0.33246	0.0127764
Ing5	-0.346449	0.0259966
Fam174a	-0.590737	0.000466922
St8sia4	-0.496983	0.000540514
Slco4c1	-0.434964	0.00425743
Panct2	-0.340314	0.0140676
Slco6c1	-0.784966	0.0414054
D1Ertd622e	-0.515043	0.000388776
Ppip5k2	-0.344085	0.00916383
Pam	-0.409071	0.0105266
B230216N24Rik	-0.676989	0.0437686
Cntnap5b	-0.364941	0.00425269
Cdh20	-0.720098	0.000107412
Rnf152	-0.506704	2.94e-06
Pign	-0.301567	0.024914
Relch	-0.441301	0.00134962
Tnfrsf11a	-0.572616	0.000248002
Gm7160	-0.450029	0.013897
Zcchc2	-0.510006	0.00116104
Gm20753	-0.655598	0.00270528
Phlpp1	-0.589527	3.99e-05
D630008O14Rik	-1.36803	0.00203658
Kdsr	-0.425047	0.011145
Vps4b	-0.429212	0.00216177
Serpinb8	-0.624518	0.00192291
Cntnap5a	-0.300405	0.0483923
Nifk	-0.572127	0.0334656
Clasp1	-0.406119	0.00503062
Gli2	-0.894877	0.00263988
Inhbb	-0.717164	0.0203932
Gm27184	-0.749849	0.00607163
Epb41l5	-0.402998	0.00710293
Ptpn4	-0.409	0.00465016
Cfap221	-0.744195	0.00344062
Dbi	1.01579	0.0254066
3110009E18Rik	-0.36208	0.0211867
Celrr	-0.822068	0.0258637
Ccdc93	-0.460872	0.0142913
Dpp10	-0.319374	0.0269425
Actr3	-0.487432	0.00294473
Slc35f5	-0.490154	0.00717154
Nckap5	-0.324692	0.0430835
Acmsd	-1.23646	0.0128838
2900009J06Rik	-0.415094	0.00985464
Ccnt2	-0.37194	0.0256282
Rab3gap1	-0.358118	0.0142913
Zranb3	-0.478243	0.0069423
Gm28800	-1.11147	0.00511029
R3hdm1	-0.565143	0.000112904
Mcm6	1.23576	0.0263493
Thsd7b	-0.625049	0.000268283
Pfkfb2	-0.400143	0.0022554
Rab29	0.947906	0.0407083
Elk4	-0.479142	0.0226762
Mfsd4a	-0.621356	0.000124159
Lemd1	-0.799835	0.0168341
Gm29695	-0.748791	0.00453878
Dstyk	-0.438477	0.00503062
Rbbp5	-0.427171	0.00139314
Nfasc	-0.320784	0.0391925
Gm10538	-1.12296	0.0082761
Mdm4	-0.294133	0.0104094
Pik3c2b	-0.343484	0.0413189
Gm28609	-0.88865	0.044194
Gm19461	-0.89032	0.0207297
Etnk2	-0.695107	0.0019352
Adora1	-0.346141	0.0401585
Ppfia4	-0.439693	0.0219536
Tmem183a	-0.318437	0.0127721
Kdm5b	-0.341369	0.043668
Syt2	-0.823293	6.2e-07
Ppp1r12b	-0.334433	0.0144389
Lmod1	-1.00849	0.00265314
Gm4793	-0.357545	0.0420969
Tnnt2	-0.416614	0.00752731
Tmem9	-0.706823	0.0144647
Kif21b	-0.383663	0.029088
Gm26781	-0.507992	0.0141488
Camsap2	-0.42468	0.007576
Ddx59	-0.417241	0.0369265
Zfp281	-0.467893	8.52e-07
Platr22	-0.416334	0.0427305
Gm4258	-0.465187	0.00232025
Gm26979	-1.39213	0.0126724
Gm26936	-1.41022	0.0123707
Gm26930	-0.426968	0.00882929
A430106G13Rik	-0.542465	0.000608796
Dennd1b	-0.37222	0.0108046
Zbtb41	-0.489044	0.00999686
Kcnt2	-0.573301	3.17e-05
4930590L20Rik	-1.13577	0.0302473
Cdc73	-0.434853	0.00458439
Glrx2	-0.426754	0.00316213
Ro60	-0.453994	0.0108388
Uchl5	-0.534421	0.00814944
Gm29170	-0.528246	0.0113697
Rgs2	-0.490678	0.0300788
Gm29514	-0.465381	0.00024721
Brinp3	-0.690289	1.37e-07
A230059L01Rik	-0.730615	0.044096
Gm15584	-1.55314	0.00616422
Ptgs2os	-0.881505	0.000629281
Ptgs2	-0.781683	4.59e-05
Tpr	-0.469744	0.0160268
Hmcn1	-0.614563	0.00638529
Gm10138	-0.665711	0.0371207
Ivns1abp	-0.351104	0.00849851
Swt1	-0.432232	0.0279551
Edem3	-0.442513	0.0147375
1700025G04Rik	-0.325592	0.0481921
Gm28610	-0.983548	0.043585
Tsen15	-0.582447	0.00132769
Colgalt2	-0.372219	0.0332408
Smg7	-0.397002	0.0133301
Gm28960	-0.72167	0.0046069
Lamc2	-0.449353	0.000458407
Shcbp1l	-0.444527	0.0136461
Teddm2	-0.300036	0.0474952
Cacna1e	-0.30557	0.0445289
Gm29282	-0.323042	0.0115174
Stx6	-0.428032	0.00395279
Xpr1	-0.420933	0.00382145
Acbd6	-0.435356	0.00182005
Gm37571	-1.03048	0.00815334
Cep350	-0.424042	0.0104559
Tdrd5	-0.510464	0.00195381
Fam20b	-0.365008	0.013873
Ralgps2	-0.362791	0.0052657
Angptl1	-1.2889	0.00908099
Rasal2	-0.499419	0.00032368
Sec16b	-0.644521	0.000127576
Astn1	-0.353807	0.0208334
Gm37679	-1.04107	0.0302843
Cop1	-0.484527	0.00260197
Rabgap1l	-0.426348	0.0018751
Gm36975	-0.988835	0.0321791
Gm37328	-0.887293	0.0013896
Zbtb37	-0.425091	0.0133393
Klhl20	-0.369226	0.00856903
Ankrd45	-0.380624	0.0300009
Tex50	-1.00668	0.0482158
Suco	-0.537181	0.00122351
Gm38304	-0.777818	0.026752
Dnm3	-0.426484	0.0030857
Dnm3os	-1.32247	0.0247807
Vamp4	-0.566477	0.00316801
Myoc	-1.29317	0.0444396
Prrc2c	-0.386289	0.00560177
Gorab	-0.519985	5.12e-05
Kifap3	-0.406791	0.00288958
Scyl3	-0.45242	0.00414433
Slc19a2	-0.593494	0.0166463
Ccdc181	-0.444693	0.0108786
Blzf1	-0.414156	0.00888632
Nme7	-0.488795	0.00244442
4930568G15Rik	-0.602006	0.00658948
Dcaf6	-0.381816	0.00503062
Mpc2	-0.331545	0.00616422
Mpzl1	-0.340693	0.014032
Cd247	-0.930697	0.00910751
Pou2f1	-0.524452	0.000300206
Ildr2	-0.410882	0.0120999
Tada1	-0.323805	0.0353052
Pogk	-0.505366	0.00520422
Fam78b	-0.392104	0.00205764
Gm20711	-0.832076	0.00949606
Pbx1	-0.317892	0.0417569
Rgs4	-0.500424	0.026761
Hsd17b7	-0.586082	0.00507394
Uap1	-0.427924	0.00270472
Uhmk1	-0.326522	0.0154241
Spata46	-1.12559	0.0292515
Atf6	-0.415403	0.0023427
Gm26620	-0.810864	0.0221623
Sdhc	-0.273617	0.0255095
Nr1i3	-1.20959	0.00256919
Usp21	-0.402238	0.00352522
Gm20045	-0.462082	0.00389825
Dedd	-0.320684	0.0394837
Vangl2	-0.390864	0.0138076
Copa	-0.381302	0.0260466
Dcaf8	-0.310201	0.0484014
Casq1	-0.995796	0.0123814
Atp1a4	-1.3108	0.00260376
Kcnj9	-0.559647	0.000486372
Pigm	-0.331109	0.0380995
Tagln2	1.18854	0.0431996
Cadm3	-0.469579	0.00174741
Ifi213	3.80793	0.000432418
Ifi207	3.53181	0.00107447
Ifi204	3.59889	0.000108997
Mndal	1.08808	0.0135098
Fmn2	-0.506217	0.000932031
Grem2	-0.422276	0.00313585
Rgs7	-0.420815	0.0122108
Fh1	-0.392336	0.0143881
Opn3	-0.750946	1.94e-06
Chml	-0.687429	4.2e-05
Pld5	-0.594061	0.00815744
Cep170	-0.46916	0.00240473
Gm36992	-1.52823	0.0270163
Sdccag8	-0.331809	0.0121246
Akt3	-0.526925	0.000273027
Gm26801	-0.365326	0.00301647
Zbtb18	-0.315139	2.81e-06
Gm37306	-0.615845	0.00722363
Adss	-0.613043	5.15e-07
Catspere1	-0.435581	0.0367932
Catspere2	-0.498636	0.00731038
Desi2	-0.428663	0.0160209
Hnrnpu	-0.491372	5.47e-05
Efcab2	-0.356803	0.00219855
Cnst	-0.35788	0.0313932
Cdc42bpa	-0.506731	0.000589117
Psen2	-0.477072	0.00390391
Gm31728	-0.566388	0.00706899
Stum	-0.377502	0.0499504
Parp1	-0.40478	0.00749527
Lin9	-0.332531	0.0369558
Sde2	-0.462281	0.00492547
Tmem63a	-0.7795	0.00516108
Nvl	-0.406926	0.040587
Wdr26	-0.499264	0.00250604
A430110L20Rik	-0.389342	0.0366319
Cnih3	-0.366472	0.0191069
Dnah14	-0.435341	0.00789219
Lbr	-0.378868	0.00320216
Enah	-0.529457	0.000226285
1700047M11Rik	-0.987841	0.0102013
Fbxo28	-0.433875	0.0306508
Trp53bp2	-0.508198	0.00174854
Capn2	-0.460271	0.00289395
Susd4	-0.395374	0.00597561
Disp1	-0.451793	3.16e-06
Brox	-0.41389	0.0293218
Mia3	-0.490647	0.00503062
Dusp10	-0.507198	0.0455089
Marchf2	-0.527833	0.000314454
Mark1	-0.509485	0.0014317
Gm38251	-0.977393	0.0438997
Rab3gap2	-0.46167	0.00734977
Gm34882	-1.31419	0.00864716
Iars2	-0.41942	0.0155033
Eprs	-0.423707	0.0128346
Gm2061	-0.721245	0.00319826
Slc30a10	-0.585837	0.000319926
Rrp15	-0.494415	0.00592331
1700007P06Rik	-0.909326	0.00872426
Gpatch2	-0.449829	0.00171281
Esrrg	-0.293368	0.0207651
Gm36388	-0.382532	0.0255176
Ush2a	-0.787645	7.39e-08
Kctd3	-0.379797	0.00711061
Kcnk2	-0.415441	0.0069736
2900042K21Rik	-0.475514	0.000889068
Gm37422	-1.31804	0.00338999
Smyd2	-0.524678	0.00187795
Prox1	-0.561796	0.0100313
Angel2	-0.431112	0.0268972
Flvcr1	-0.430789	0.03922
Ppp2r5a	-0.524569	0.000263672
Gm32200	-0.717784	1.62e-05
Lpgat1	-0.340555	0.0180251
1700034H15Rik	-0.530489	0.00325262
Traf5	-0.313423	0.0436757
Rcor3	-0.432727	0.00484161
Gm10516	-0.463248	0.00808356
Kcnh1	-0.425246	0.00283387
Hhat	-0.458106	0.00453467
Syt14	-0.318856	0.0420453
Utp25	-0.343188	0.0144583
Hsd11b1	-0.582991	0.00308576
Camk1g	-0.729576	0.0305839
4930503O07Rik	-0.941613	0.000340491
Plxna2	-0.429489	0.00195584
Cd34	-0.57239	0.0324348
Gm37027	-1.29913	0.0418084
Cd46	-0.424629	0.0015418
Cr1l	-0.361897	0.0147412
Cr2	-1.1181	0.0310778
Fam171a1	-0.528519	0.00933717
Nmt2	-0.517878	0.000302868
Meig1	-0.719765	0.0164949
Suv39h2	-0.590397	0.0203035
Hspa14	-0.632689	0.00305841
Gm45902	-0.6508	0.00310363
1700080N15Rik	-0.971666	0.0179307
Gm13187	-1.209	0.00234598
Prpf18	-0.436142	0.001669
Bend7	-0.458296	0.0147932
4930551O13Rik	-1.55077	0.0132809
Cdc123	-0.38915	0.0102758
Nudt5	-0.743417	0.0324812
Gm13199	-0.537326	0.00893173
Upf2	-0.338914	0.00765194
Proser2	-0.609286	0.0106114
Usp6nl	-0.360521	0.0222463
Gm13391	-0.737922	0.0155953
Celf2	-0.365781	0.0168362
Gm13389	-0.972648	0.0168435
Gm10115	-0.458102	0.00933717
Atp5c1	-0.480355	0.00155156
Kin	-0.43911	0.000155386
Prkcq	-0.854008	0.00129928
Gm10851	-0.678636	0.0139972
Rbm17	-0.382017	0.00264019
Fbh1	-0.472414	0.00150449
Ankrd16	-0.561781	0.000242543
Mindy3	-0.398025	0.0100194
Gm13270	-0.455857	0.0161794
Cubn	-1.24318	0.00719661
Trdmt1	-0.37238	0.0101662
Vim	2.43793	0.00274042
Hacd1	-0.338459	0.0175581
Stam	-0.370228	0.00503961
Nsun6	-0.543408	0.0117613
Arl5b	-0.570392	0.0326606
Malrd1	-0.64352	0.0134215
Nebl	-0.387157	0.00955364
Skida1	-0.685634	0.0402302
Mllt10	-0.358889	0.00423462
Bmi1	-0.293184	0.0225791
Spag6	-0.568598	0.00011499
Gm20539	-0.325288	0.011211
Pip4k2a	-0.541266	9.15e-06
Armc3	-0.687962	0.0207372
4930447M23Rik	-0.516266	0.00451234
Msrb2	-0.362369	0.026577
Gm33940	-0.327936	0.0349641
Etl4	-0.598171	0.000248002
Gm17171	-1.26673	0.00154838
Gm13335	-2.1069	1.97e-05
Gm13362	-1.45324	0.0301439
Arhgap21	-0.456651	0.00239067
Gm13375	-0.878693	0.0158107
Enkur	-0.560086	0.00121342
Gm13327	-0.442315	0.0282923
Gpr158	-0.39478	0.00511783
Gad2	-0.578017	0.00163196
Pdss1	-0.420208	0.00942513
Abi1	-0.417977	0.0142057
Acbd5	-0.360673	0.0306866
Yme1l1	-0.324168	0.00956345
4931423N10Rik	-0.603519	0.000223454
Nxph2	-0.305401	0.0279927
Spopl	-0.526786	0.00118766
Hnmt	-0.45752	0.00270528
Cacna1b	-0.330908	0.0373074
Ehmt1	-0.337398	0.0107154
Grin1	-0.446414	0.00314482
Grin1os	-1.03416	0.000532894
Dpp7	-0.34251	0.0095405
Fcnaos	-0.358312	0.0437732
A230005M16Rik	-1.17381	0.0179555
Camsap1	-0.417965	0.0183307
Ubac1	-0.385484	0.0427702
Qsox2	-0.408067	0.0061961
Gpsm1	-0.39588	0.0105285
Gm13562	-0.586744	0.0102495
0610009E02Rik	-0.609425	0.0121932
Fam163b	-0.352374	0.0161794
Brd3	-0.364908	0.00577968
Olfm1	-0.504603	0.00184104
Mrps2	-0.398666	0.0317253
Tsc1	-0.383591	0.00364248
Spaca9	-0.938333	0.047942
Ak8	-0.423074	0.00359042
Gtf3c4	-0.496415	0.00389212
Setx	-0.282132	0.0388755
Ntng2	-0.550335	0.00424975
Gm13402	-1.10926	0.0278182
Sptan1	-0.361292	0.0401766
Set	-0.353257	0.024472
Gm14471	-0.968309	0.0407213
Gm16323	-1.06273	0.0211565
Cstad	-0.777451	4.59e-05
Fnbp1	-0.340871	0.0115901
Fubp3	-0.345882	0.00240901
Nup214	-0.370517	0.0141121
Swi5	-0.304626	0.037853
Ciz1	-0.293015	0.0120304
Naif1	-0.69088	0.0395891
Sh2d3c	-0.533119	0.0274618
Tor2a	-0.398011	0.00205057
Ptrh1	-0.574339	0.0391386
Cfap157	-0.972295	0.00937919
Stxbp1	-0.420478	0.00171686
Gm13524	-0.687855	0.00116934
Garnl3	-0.305396	0.024472
Gm13528	-0.952334	0.0109508
Angptl2	-0.924281	0.0259283
Zbtb43	-0.43236	0.0243541
Gm13530	-0.281613	0.00581198
Lmx1b	-0.421854	0.0184021
Nron	-1.22659	0.00310363
Pbx3	-0.459015	0.00545644
Mapkap1	-0.390524	0.00570924
Gapvd1	-0.295343	0.0346316
Cntrl	-0.350673	0.0428046
Rab14	-0.513023	0.00503062
Dab2ip	-0.449164	0.000315985
Ttll11	-0.407522	0.0103701
Rbm18	-0.440044	0.0455611
Mrrf	-0.357887	0.021118
Rc3h2	-0.247294	0.0492527
Zbtb6	-0.357458	0.0214732
Zbtb26	-0.641843	0.00503961
Rabgap1	-0.423949	0.001497
Strbp	-0.47172	0.00010141
Gpr21	-0.441889	0.00948946
Dennd1a	-0.342976	0.00744106
Lhx2	-0.358733	0.0180811
Gm13584	-1.00458	0.00764335
Psmb7	-0.406421	0.00516108
Nr6a1	-0.315477	0.0415311
Nr6a1os	-0.858667	0.0435473
Scai	-0.431868	0.0016158
Ppp6c	-0.414643	0.00275846
Lrp1b	-0.376413	0.0115237
Arhgap15	-0.320859	0.0139461
Gtdc1	-0.555777	2.3e-05
Zeb2os	-0.626626	0.0179557
Gm13481	-0.430775	0.0435818
Acvr2a	-0.295934	0.0393529
Orc4	-0.446453	0.00121449
Mbd5	-0.38643	0.0076258
Epc2	-0.452087	0.00497601
Kif5c	-0.521422	0.00133778
Lypd6	-0.440252	0.0182257
Mmadhc	-0.485469	0.00494826
Rnd3	-0.722788	0.000454122
Nmi	1.99903	0.00169861
Neb	-0.618501	0.000389287
A430018G15Rik	-0.98475	0.0389996
Cacnb4	-0.452548	0.0176888
Stam2	-0.377718	0.00656717
Prpf40a	-0.404668	0.00465016
Arl6ip6	-0.381	0.0209524
Galnt13	-0.310853	0.0343154
Gm14033	-0.308723	0.00405654
Kcnj3	-0.57471	0.000201504
Nr4a2	-1.28141	0.0158107
BB557941	-0.557648	0.0182775
Gpd2	-0.440372	0.00361196
Acvr1c	-0.556229	0.000184841
Gm13544	-1.37493	0.00579609
Ccdc148	-0.380927	0.0199574
Gm11099	-1.16596	0.0348174
Baz2b	-0.356241	0.00411817
Marchf7	-0.517304	0.00239267
Rbms1	-0.306347	0.0298299
Tank	-0.485446	0.00434077
Psmd14	-0.516091	0.000115591
Tbr1	-0.313978	0.00853538
Slc4a10	-0.496027	0.00212111
Dpp4	-0.710745	0.000444332
Fap	-0.716145	8.42e-06
Ifih1	2.17	0.000164357
Gca	-0.407809	0.0104017
Kcnh7	-0.528294	0.000557497
Gm13569	-1.19081	0.0225423
Cobll1	-1.05353	0.00173167
Slc38a11	-1.35447	0.00116081
Scn3a	-0.344582	0.026782
Scn2a	-0.470989	4.32e-05
Csrnp3	-0.285742	0.0316416
Gm13619	-1.0527	0.036502
Galnt3	-0.496185	0.0118142
Ttc21b	-0.484046	0.00196203
Scn1a	-0.559532	5.31e-06
Gm13630	-0.822326	0.0119877
Gm13629	-0.500028	0.00942541
Xirp2	-1.47484	0.00291502
Gm13601	-0.578122	0.000221046
B3galt1	-0.331299	0.0281995
Gm26743	-1.32897	0.0098173
Stk39	-0.370685	0.0106805
Fastkd1	-0.321573	0.0402044
Ppig	-0.41358	0.00104963
Ccdc173	-0.472178	0.00122109
Phospho2	-0.379994	0.0126085
Klhl23	-0.344845	0.0346995
Ssb	-0.508118	0.00254544
Gm13625	-0.858483	0.0274618
Ubr3	-0.416709	0.00407252
Gorasp2	-0.325705	0.0476061
Tlk1	-0.497765	8.9e-06
Mettl8	-0.493548	0.000264203
Dcaf17	-0.446519	0.0318946
Dync1i2	-0.416895	0.00188566
Slc25a12	-0.371052	0.00618799
Itga6	-0.595465	0.000281967
Rapgef4	-0.376085	0.0202952
Rapgef4os1	-1.0635	0.0458679
Rapgef4os3	-1.8353	0.00776551
Map3k20	-0.450078	0.0061724
Sp3	-0.428865	0.00690437
Ola1	-0.446967	0.000931912
Cir1	-0.331482	0.0108046
Gpr155	-0.386079	0.0123577
Gm13709	-1.14904	0.0255292
Gm13708	-1.14761	0.0262022
Chn1os3	-0.861031	0.000803135
Chn1	-0.375862	0.0362336
Atf2	-0.4588	0.000422723
Lnpk	-0.587942	0.000517758
Mtx2	-0.525784	0.000551006
2600014E21Rik	-0.500908	0.000215509
Hnrnpa3	-0.431285	0.0250981
Agps	-0.410207	0.00060197
Rbm45	-0.419072	0.0380025
Osbpl6	-0.333129	0.0113591
Plekha3	-0.476475	0.00223448
Sestd1	-0.461159	0.00213103
Zfp385b	-0.382774	0.0169509
Cwc22	-0.400582	0.00446173
4930440I19Rik	-0.653926	0.00743732
Ube2e3	-0.344563	0.0340719
Itga4	-0.456277	0.00287539
Cerkl	-0.459535	0.0041076
Pde1a	-0.367833	0.0331172
Dnajc10	-0.413987	0.0255422
Nckap1	-0.483073	0.0015418
Dusp19	-0.367871	0.0443366
Nup35	-0.356381	0.0309483
Zfp804a	-0.547868	0.000779293
Zc3h15	-0.490399	0.0159201
Itgav	-0.521772	0.0126085
Gm13684	-1.23082	0.0207965
Fam171b	-0.407078	0.00347256
Tfpi	-0.528848	0.004942
Ctnnd1	-0.424846	0.0135151
Med19	-0.437987	0.0366213
Zdhhc5	-0.459595	0.0371982
Serping1	2.02448	0.00253827
Ube2l6	0.884335	0.0139846
Rtn4rl2	-0.531295	0.0298759
Lrrc55	-0.652894	0.000103358
4933423P22Rik	-1.1168	0.000299916
Nup160	-0.359115	0.047942
Mtch2	-0.430568	0.0161794
Ndufs3	-0.243119	0.0258123
Celf1	-0.356069	0.00303805
Pacsin3	-0.405558	0.0265854
Lrp4	-0.599963	0.00459628
Ckap5	-0.36719	0.00627148
Arhgap1	-0.504931	0.0152908
Ambra1	-0.305197	0.0103143
Gm9821	-1.47145	4.68e-05
Gm13780	-1.3314	0.0141911
Cry2	-0.480505	0.0177256
D930015M05Rik	-1.18689	0.00607551
Gm13814	-0.508666	0.0277164
Prdm11	-0.378302	0.0246023
4631405J19Rik	-1.17836	0.00361953
Ext2	-0.40118	0.004057
Alkbh3	-0.350887	0.00511783
Hsd17b12	-0.569345	0.00572811
Mir670hg	-0.994911	5.2e-12
Ttc17	-0.394081	0.00475622
Api5	-0.44028	0.0492358
Lrrc4c	-0.54828	1.75e-05
4930445B16Rik	-1.44374	0.0101781
B230118H07Rik	-0.387669	0.00149562
Prr5l	-0.818421	0.00511994
Gm13919	-0.731976	0.0240762
Trim44	-0.392316	0.00320216
Pamr1	-0.598615	7.13e-06
Slc1a2	-0.58241	0.000100374
Gm13872	-1.90881	1.83e-05
Pdhx	-0.481318	0.000543509
Cat	-0.408806	0.037912
Caprin1	-0.415279	0.0178917
4931422A03Rik	-1.0186	0.0013228
Fbxo3	-0.443721	0.00620291
Cd59b	-0.579916	0.0104393
Hipk3	-0.484282	0.00621579
Cstf3	-0.484338	0.0136759
Tcp11l1	-0.286773	0.0306316
Qser1	-0.363442	0.0101316
Ccdc73	-1.08382	0.0310027
Eif3m	-0.454321	0.00275943
Elp4	-0.367879	0.00466487
Immp1l	-0.584303	0.0204695
Dnajc24	-0.379069	0.0104152
Mpped2	-0.380324	0.000658262
Arl14ep	-0.425541	0.0182824
Kcna4	-0.585064	0.00151673
Mettl15	-0.46093	0.00129154
Kif18a	-0.423317	0.0310406
Bdnf	-1.02395	0.00185162
Lgr4	-0.478213	5.93e-06
Ccdc34	-0.298354	0.0300732
Ccdc34os	-1.678	0.00204645
Slc5a12	-1.58723	0.0135775
Ano3	-0.420935	0.000243217
Muc15	-1.36671	0.0117537
Lpcat4	-0.275536	0.0224604
Slc12a6	-0.29846	0.00865321
Katnbl1	-0.359679	0.0260412
Ryr3	-0.386836	0.00341676
Fmn1	-0.451032	0.0022326
Gm13963	-1.43483	0.012045
4930533B01Rik	-1.21956	0.0361025
Grem1	-0.423281	0.00714296
Scg5	-0.448949	0.000216693
A530058N18Rik	-0.82594	9.94e-07
Aqr	-0.443436	0.00398325
Dph6	-0.612973	6.39e-07
BC052040	-0.385953	0.0176408
G630016G05Rik	-0.302419	0.0222889
D330050G23Rik	-0.654971	0.00621538
Gm29340	-0.520736	0.00882092
Spred1	-0.674658	0.0216163
Fam98b	-0.425405	0.00573914
Rasgrp1	-0.548525	9.08e-06
Gpr176	-0.477221	0.000400831
Eif2ak4	-0.420829	0.00255818
Pak6	-0.582605	0.0158569
Knstrn	0.408652	0.0338737
Bahd1	-0.42181	0.0400086
Ccdc32	-0.579146	0.0105214
Rmdn3	-0.35143	0.013543
Zfyve19	-0.344503	0.0354985
Vps18	-0.49011	0.0163072
Dll4	-0.38659	0.0352432
Rtf1	-0.385127	0.00439208
Itpka	-0.487952	0.0178495
Mga	-0.38938	0.00363711
Pla2g4b	0.444544	0.0112889
Pla2g4e	-0.339733	0.00264926
Tmem87a	-0.379656	0.0262966
Ganc	-0.515426	0.00776187
Zfp106	-0.359713	0.0364661
Haus2	-0.467108	0.00340704
Ttbk2	-0.3729	0.00504506
Ubr1	-0.416815	0.00516222
Tmem62	-0.429738	0.000477527
Tgm7	-0.508719	0.0428504
Lcmt2	-0.407006	0.0494321
Adal	-0.360581	0.0247645
Zscan29	-0.729624	0.00445167
Tubgcp4	-0.525191	0.00102458
Trp53bp1	-0.517291	5.6e-05
Ppip5k1	-0.359687	0.0123033
Serinc4	-0.677911	0.025328
Frmd5	-0.340987	0.0136461
Casc4	-0.461907	0.00119208
Ctdspl2	-0.435071	0.00355365
Eif3j1	-0.307211	0.0394837
Spg11	-0.356899	0.00814944
Gatm	-0.641713	1.32e-06
Slc30a4	-0.406761	0.0176808
4930417H01Rik	-0.287341	0.00799978
Bloc1s6	-0.494146	0.00996525
Sema6d	-0.459573	0.00723458
4930583P06Rik	-1.73326	0.00920955
Slc24a5	-1.51268	0.0127811
Myef2	-0.469131	2.38e-05
Dut	-0.450252	0.0341949
Fbn1	-0.492551	0.00621538
Secisbp2l	-0.361134	0.0187041
Cops2	-0.442047	0.00641475
Galk2	-0.470746	0.00219855
Slc27a2	-0.466997	5.12e-05
Gabpb1	-0.33816	0.0107208
Gm27003	-0.425602	0.024055
Usp8	-0.360838	0.0214734
Usp50	-0.898799	0.0470467
Trpm7	-0.354299	0.030655
Sppl2a	-0.429847	0.00736982
Tmem127	-0.47207	0.0278764
Stard7	-0.30373	0.0177436
Zfp661	-0.374432	0.0475456
Nphp1	-0.414287	0.00136173
Anapc1	-0.35578	0.00779234
Tmem87b	-0.298811	0.0316416
Fbln7	-0.617623	0.032513
Zc3h8	-0.57884	0.00533763
Zc3h6	-0.396967	0.00269806
Gm14022	-0.692607	0.0231768
Ttl	-0.47659	0.00123818
9830144P21Rik	-0.980462	0.0180811
Sirpa	-0.453136	0.00209887
Tgm6	-0.778988	0.00232055
Tmc2	-1.159	0.0318187
Pced1a	-0.451184	0.00525993
Ptpra	-0.333142	0.0231861
4930473A02Rik	-0.779273	0.0371207
Ubox5	-0.376778	0.0265488
Lzts3	-0.276676	0.0153036
Ddrgk1	-0.319434	0.0466218
Slc4a11	0.736814	0.0017658
4930402H24Rik	-0.305008	0.0302473
A730017L22Rik	-0.498712	0.00403597
Atrn	-0.461104	0.000811437
Adam33	-0.554179	0.0487099
1700037H04Rik	-0.526604	0.0394837
Pank2	-0.380862	0.0170801
Rnf24	-0.454666	0.0201375
Adra1d	-0.637562	0.000890162
5330413P13Rik	-0.587407	0.0221516
Cds2	-0.445413	0.0022326
Gpcpd1	-0.472502	0.00024721
Shld1	-0.334388	0.0109105
Chgb	-0.637694	0.0474472
Trmt6	-0.495129	0.0269425
Mcm8	-0.886454	0.00764557
Crls1	-0.326028	0.0142589
Fermt1	-1.00686	0.00524434
Bmp2	-0.621472	0.0394837
Hao1	-0.694632	0.00436652
Tmx4	-0.472046	0.0132986
Plcb1	-0.464682	0.0122756
4930545L23Rik	-1.21805	0.0116938
9630028H03Rik	-1.28854	0.0218561
Plcb4	-0.429993	0.00135815
Pak7	-0.505972	0.000619905
Ankef1	-0.915319	0.0233882
Snap25	-0.555075	2.17e-05
Btbd3	-0.302585	0.0358484
Gm14066	-0.406724	0.0275559
Ism1	-0.569568	0.00752163
Tasp1	-0.42118	0.00338243
Esf1	-0.380258	0.0349641
Ndufaf5	-0.328504	0.0316516
Macrod2	-0.357462	0.0157617
Macrod2os2	-1.09121	0.0223487
Macrod2os1	-1.33709	0.0112633
Kif16b	-0.439603	0.00491986
Snrpb2	-0.525054	0.00105348
Pcsk2os1	-0.503538	0.0339998
Pcsk2	-0.391296	0.000388646
Pcsk2os2	-1.48445	0.00258045
Dstn	-0.401557	0.0474834
Snx5	-0.331153	0.0227246
Ovol2	-0.462508	0.0181062
Kat14	-0.421568	0.0046069
Dzank1	-0.380106	0.01804
Polr3f	-0.257628	0.0371284
Dtd1	-0.375818	0.00574787
Slc24a3	-0.361825	0.011656
Gm14092	-1.0264	0.0413296
Crnkl1	-0.542222	0.00698556
Ralgapa2	-0.405236	0.00294473
A930019D19Rik	-1.64585	0.00703943
Kiz	-0.34742	0.0491132
Xrn2	-0.376083	0.00848698
Cd93	-1.06869	0.0110058
Gm14120	-0.494451	1.72e-05
Napb	-0.378954	0.0289571
Cst3	1.39027	0.0359615
Gm14133	-1.15361	2.78e-05
C530025M09Rik	-0.707547	0.00409104
Syndig1	-0.67096	2.7e-07
Zfp120	-0.389013	0.00337754
Zfp937	-0.414508	0.00365994
Gm10130	-0.885147	0.0213004
Zfp442	-0.440506	0.00101907
Apmap	-0.482515	0.0194002
Entpd6	-0.502213	0.0308518
Pygb	-0.508313	0.0108094
Ninl	-0.454844	0.000721921
Nsfl1c	-0.360961	0.0216163
Rad21l	-0.719543	5.38e-05
Tmem74b	-0.817625	2.69e-06
Psmf1	-0.447592	0.00309345
Csnk2a1	-0.426743	0.00365994
Bcl2l1	-0.41197	0.00325407
Dusp15	-0.362855	0.018025
Tm9sf4	-0.390659	0.00503773
Plagl2	-0.490942	0.00441069
Pofut1	-0.314361	0.0167771
2500004C02Rik	-0.395314	0.0444333
Asxl1	-0.331475	0.0118733
Commd7	-0.421965	0.0143994
Mapre1	-0.382385	0.0189532
1700003F12Rik	-0.748398	0.00959887
E2f1	-0.469054	0.0110228
Zfp341	-0.388428	0.0104851
Gm45609	-0.578549	0.00288958
Itch	-0.392967	0.0252743
Pigu	-0.366882	0.00779684
Ncoa6	-0.420469	0.00495655
Acss2os	-1.24482	0.01194
Myh7b	-0.465897	1.58e-08
Uqcc1	-0.320938	0.0188328
6430550D23Rik	-0.629195	0.0488866
Spag4	-0.365708	0.0358484
Cpne1	-0.437996	0.0173271
Epb41l1	-0.473275	0.00860654
Gm14169	-0.597513	0.00147559
Dlgap4	-0.398761	0.0419896
4930405A21Rik	-0.845905	0.000630475
Sla2	-0.437088	0.0159111
Ndrg3	-0.475457	0.0007622
Dsn1	-1.01405	0.000246021
Mroh8	-0.399145	0.00442011
Rpn2	-0.329851	0.0339998
Gm14286	-0.475141	0.0110214
Blcap	-0.297804	0.0142913
Ctnnbl1	-0.250517	0.0428078
Vstm2l	-0.570257	5.47e-05
Tti1	-0.37309	0.00991682
Rprd1b	-0.319469	0.0267417
2010009K17Rik	-1.35594	0.00495457
Snhg17	-0.448566	0.0162651
Ralgapb	-0.345288	0.013341
Ppp1r16b	-0.49678	0.00446173
Top1	-0.436263	0.00314883
Gm27206	-1.02698	0.00552955
Zhx3	-0.354822	0.0214728
Chd6	-0.452319	0.00133013
Ptprt	-0.348396	0.0411516
Srsf6	-0.362527	0.00908409
L3mbtl1	-0.481999	0.0018478
Tox2	-0.282698	0.00734977
Oser1	-0.551835	0.0254895
Pkig	-0.299371	0.0426531
Gm16316	-1.23694	0.00218778
Ada	-0.901166	0.019881
Rims4	-0.444336	0.0420969
Tomm34	-0.428064	0.00313472
Kcns1	-0.732741	0.00191411
Gm14317	-0.794456	4e-05
Gm11457	-1.11957	0.0196141
Slc12a5	-0.354584	0.000927338
Ncoa5	-0.414459	0.00825336
Gm14397	-0.91397	0.00640803
Zfp334	-0.346949	0.0287214
Eya2	-0.545443	0.00991682
BC046401	-0.953675	0.000198391
Ncoa3	-0.371083	0.0372715
Cse1l	-0.362289	0.0216163
Ddx27	-0.362437	0.00317899
Kcnb1	-0.38265	0.0152758
Ptgis	-1.04419	0.0116204
Spata2	-0.701821	0.0127586
Nfatc2	-0.377609	0.00955911
Zfp64	-0.347812	0.0349641
Tshz2	-0.285757	0.0102013
Dok5	-0.515688	0.00275943
Pmepa1	-0.33566	0.0275877
Vapb	-0.348543	0.0157606
Stx16	-0.442255	0.00705911
Gnas	-0.467104	0.00175592
Gm20721	-1.15322	0.00714705
Gm14399	-0.346075	0.0171017
Gm14443	-0.411418	0.0214734
Gm14391	-0.390139	0.0127982
Gm6710	-0.37245	0.00163196
Zfp973	-0.46571	0.000517758
Gm14305	-0.468326	0.000966209
Zfp970	-0.35572	0.0226514
Gm14406	-0.348533	0.0391417
Gm14326	-0.315183	0.0277164
Phactr3	-0.365241	0.00999483
Ppp1r3d	-0.523113	8.97e-05
Fam217b	-0.329564	0.0398622
Taf4	-0.413208	0.00910861
Ss18l1	-0.336201	0.016316
Hrh3	0.378923	0.00778646
Cables2	-0.258439	0.0283815
Slco4a1	-0.325967	0.00446719
Ntsr1	-0.622819	0.000302868
Dido1	-0.333435	0.0475693
Gm14342	-0.62489	0.00688832
Gm14344	-0.785496	0.000569222
Ythdf1	-0.470081	0.00706899
Nkain4	-0.629152	0.00312009
Chrna4	-0.290169	0.0184109
Gmeb2	-0.342085	0.033044
Stmn3	-0.480686	0.024385
Zbtb46	-0.48295	0.0153948
Dnajc5	-0.369116	0.00537084
Pcmtd2	-0.37276	0.00193585
Pex2	-0.451658	0.000221046
Pkia	-0.522457	0.000124984
Zc2hc1a	-0.57779	0.00142868
Mrps28	-0.368263	0.00288958
Tpd52	-0.395654	0.00417912
Zbtb10	-0.727371	1.37e-05
C030034L19Rik	-1.11316	0.00511994
Zfp704	-0.412136	0.00503062
Pag1	-0.403641	0.0192791
Gm16337	-1.16337	0.0287845
Gm9833	-0.308858	0.0437548
Impa1	-0.47191	0.0130789
Zfand1	-0.418909	0.00374179
Chmp4c	-1.15645	0.0246658
Snx16	-0.465926	0.0108046
Ralyl	-0.48497	0.000609231
Lrrcc1	-0.661399	1.07e-05
E2f5	-0.590955	0.0011302
Ythdf3	-0.495422	0.000276237
Gm30340	-0.503461	0.00349261
Mir124-2hg	-0.467313	1.41e-05
Cyp7b1	-0.334854	2.02e-05
Armc1	-0.487949	0.00217684
Pde7a	-0.414306	0.00415153
Gm16093	-1.30254	0.0096075
Dnajc5b	-1.06107	0.00410799
1700064H15Rik	-0.674841	0.0335923
Hps3	-0.303354	0.0379251
Hltf	-0.374959	0.00298835
Gyg	-0.466054	0.00215397
Gm43674	-0.70242	0.00860654
Tbl1xr1	-0.446328	0.000198492
Naaladl2	-0.448079	0.000515242
Nlgn1	-0.312679	0.0490284
Gm37573	-0.444907	0.0131826
Spata16	-0.72696	0.0312602
Nceh1	-0.303957	0.0499297
Fndc3b	-0.499565	0.00263518
Tnik	-0.387942	0.00721354
1700112D23Rik	-0.396434	0.00441069
Eif5a2	-0.488914	0.00813459
Sec62	-0.472695	0.0134479
Phc3	-0.37002	0.00469682
Prkci	-0.484329	0.000124307
Gm15496	-1.13185	0.0206305
Kcnmb2	-0.413594	0.00971257
Zmat3	-0.439806	0.00814045
Pik3ca	-0.436311	0.00506837
Zfp639	-0.378928	0.0310544
Mfn1	-0.412145	0.00626185
Gnb4	-0.487301	0.0141146
Mrpl47	-0.402408	0.04153
Gm37459	-1.24145	0.0103914
4930419G24Rik	-1.14834	0.0132804
Gm43666	-0.45554	0.0219059
Ttc14	-0.488418	0.000984192
Ccdc39	-0.532403	3.5e-05
Fxr1	-0.438207	0.00711998
Dnajc19	-0.750304	0.0487877
Sox2ot	-0.789119	0.000117692
Gm38505	-1.55302	0.0179055
Atp11b	-0.471866	0.00203574
Dcun1d1	-0.517782	0.00429315
Mccc1	-0.465442	0.00876386
Zfp267	-0.556827	7.14e-05
Anxa5	-0.422444	0.025624
Bbs7	-0.458074	0.0126421
Trpc3	-0.564698	2.69e-06
4932438A13Rik	-0.389532	0.00557925
Bbs12	-0.373844	0.0316537
Fgf2os	-1.30557	0.00954725
Nudt6	-0.687271	0.00116934
Spata5	-0.487667	0.000459071
Ankrd50	-0.47472	0.00121776
Hspa4l	-0.487691	0.000838821
Abhd18	-0.442292	0.0161625
1700034I23Rik	-1.31504	0.0207914
Larp1b	-0.560799	0.00433951
Pgrmc2	-0.42724	0.0324286
Jade1	-0.449956	0.0093831
Sclt1	-0.561465	0.000171088
D3Ertd751e	-0.456016	0.00988473
2610316D01Rik	-0.671021	2.52e-06
Pcdh10	-0.466413	0.00581359
Gm6209	-0.417016	0.0357575
Elf2	-0.424177	0.000923442
Naa15	-0.366985	0.00542242
Setd7	-0.414392	0.0203159
Gm37229	-1.77789	0.00396571
Gm20089	-1.42451	0.00322417
Foxo1	-0.437643	0.0320681
Nhlrc3	-0.272902	0.0429946
Exosc8	-0.519986	0.0453012
Rfxap	-0.527335	0.0420969
Sertm1	-0.597788	0.0121122
Ccna1	-0.532533	0.0439746
4931419H13Rik	-0.622977	0.000525383
Spg20	-0.376067	0.020449
Dclk1	-0.438782	0.00212389
Gm42609	-1.49696	0.00251524
Gm21954	-1.32144	0.0387434
Nbea	-0.51194	0.000756017
Gm43376	-1.35594	0.0207199
Wwtr1	-0.445452	0.0125243
Commd2	-0.390623	0.011656
Ankub1	-1.34976	0.00160183
Rnf13	-0.464885	0.000339582
4921539H07Rik	-0.443088	0.000126936
1700007F19Rik	-0.929944	0.00219855
Tsc22d2	-0.597336	0.00166007
Siah2	-0.543183	0.0322788
4930593A02Rik	-0.417896	0.00357803
Gm43570	-0.519601	0.0214521
Med12l	-0.35955	0.0219872
Gpr171	-1.2762	0.0372135
Gpr87	-1.27904	0.00882929
Mbnl1	-0.444836	0.00607551
Dhx36	-0.505578	0.00417912
E130311K13Rik	-0.31721	0.0277607
Slc33a1	-0.462252	0.00500819
Gmps	-0.390389	0.0231562
Kcnab1	-0.457275	0.00307151
A330015K06Rik	-1.45545	0.0036917
A730090N16Rik	-1.24578	0.00302726
Lekr1	-0.495092	6.51e-05
Ccnl1	-0.465991	0.0066933
Rsrc1	-0.484649	5.12e-05
Gfm1	-0.466035	0.00326896
Schip1	-0.327955	0.0418881
Ift80	-0.2597	0.0270158
Smc4	-0.405094	0.0299916
Trim59	-0.615615	0.00827191
Kpna4	-0.442842	0.0321811
Ppm1l	-0.553123	9.77e-05
B3galnt1	-0.439057	0.000833413
Nmd3	-0.440992	0.00933717
Sptssb	-0.748639	5.73e-05
Slitrk3	-0.358351	0.00467636
Gm20754	-0.297618	0.036727
4930509J09Rik	-1.09129	0.04207
Bche	-1.06661	0.02128
Pdcd10	-0.468382	0.00933717
Golim4	-0.550493	5.03e-05
Fstl5	-0.372068	0.0279358
Gm17359	-1.01365	0.0267072
Fnip2	-0.346329	0.0384978
Ppid	-0.565392	0.000255906
Gask1b	-0.812282	1.32e-05
A330069K06Rik	-0.779497	0.00377198
Gm37971	-0.390294	0.0139651
Gria2	-0.514557	0.000160681
Glrb	-0.505174	0.00815334
Gucy1b1	-0.415021	0.00433964
Gucy1a1	-0.364136	0.0330682
Map9	-0.408619	0.00813459
Plrg1	-0.278531	0.0414775
Dchs2	-0.505728	0.0170445
Tmem131l	-0.329558	0.0287845
Gm37240	-0.981305	0.0170203
Fbxw7	-0.408811	4.09e-05
Gm15535	-0.669862	0.0204075
Gatb	-0.488821	9.94e-07
Fam160a1	-0.852006	0.00160528
Sh3d19	-0.489583	0.000215509
Prss48	-1.50743	0.00446719
Lrba	-0.440085	0.00121136
Gm37876	-0.736361	0.00319826
Etv3	-0.423515	0.0468834
Arhgef11	-0.332371	0.0415573
Hdgf	-0.467436	0.00512085
Bcan	-0.347164	0.0332363
Gpatch4	-0.335744	0.0188328
AI849053	-0.907528	0.0169509
Gm3764	-0.537992	0.0046069
Slc25a44	-0.620882	0.000665541
Gm37584	-0.492256	0.000419752
Mex3a	-0.488017	0.00302759
Ubqln4	-0.244506	0.0335593
Khdc4	-0.372264	0.0283163
Ash1l	-0.375519	0.00533626
Gm16069	-0.700162	0.00985231
Gm15998	-0.942575	0.0469219
4731419I09Rik	-1.0262	0.0224397
Dcst1	-1.69234	9.29e-06
Pmvk	-0.407506	0.0276739
Chrnb2	-0.409529	0.00503062
4632404H12Rik	-0.441105	0.013123
Atp8b2	-0.337001	0.0142913
Gm19710	-1.22619	0.0309449
Ubap2l	-0.319965	0.0259583
4933434E20Rik	-0.336219	0.0443402
Tpm3	-0.433306	0.00483874
Gatad2b	-0.296829	0.0299795
Chtop	-0.441185	0.000550965
S100a1	1.70361	0.00229357
S100a13	1.39333	0.00579862
S100a16	1.52027	0.0087471
S100a11	1.34281	0.0334375
Them4	-0.364474	0.0269425
Gm42463	-0.527422	0.00628121
Snx27	-0.321086	0.0145746
Gm43773	-0.541858	0.00255818
Tuft1	-0.426331	0.0307893
Pogz	-0.411917	0.00433964
Gabpb2	-0.259223	0.0409294
Gm16740	-1.00249	0.040543
Cers2	-0.304774	0.0334613
Arnt	-0.328155	0.0263012
Rprd2	-0.354939	0.0269682
Prpf3	-0.349312	0.0239098
Aph1a	-0.368916	0.0232738
Anp32e	-0.440127	0.0368824
Vps45	-0.362703	0.0161303
Otud7b	-0.471521	0.00187658
Sv2a	-0.337654	0.0176793
Hist2h2be	-0.455181	0.00281735
Nudt17	-0.526459	0.0106319
Rnf115	-0.391872	0.0108882
Pdzk1	-1.34926	0.00525702
Gpr89	-0.383473	0.0184899
Bcl9	-0.299107	0.0434582
Chd1l	-0.52302	0.00545919
Prkab2	-0.36407	0.0289384
Pde4dip	-0.376901	0.0104692
Gm31305	-1.0603	0.0233089
Sec22b	-0.509049	0.014853
Zfp697	-0.403844	0.0126158
Gm4450	-1.43506	0.020185
Gm43190	-0.971137	0.0310544
Gm10681	-1.06959	0.0389729
Hsd3b5	-1.62232	0.00381573
Hsd3b2	-1.23213	0.019781
Hsd3b6	-1.21114	0.0255648
Hao2	-1.52362	0.0119928
Wars2	-0.387528	0.00444651
Gm42717	-0.478294	0.0328996
Gdap2	-0.430098	0.0369265
Man1a2	-0.445495	0.0021528
Gm43466	-0.536052	0.00221346
Gm42869	-0.48859	0.0176808
Gm43462	-0.476413	0.000199007
Trim45	-0.569344	0.000736388
Ptgfrn	-0.361548	0.00839851
Gm43465	-0.75588	0.0165924
Igsf3	-0.531026	0.00321023
Atp1a1	-0.607664	0.000923932
Gm42937	-0.696399	0.0147412
Gm42941	-0.662407	0.030379
Slc22a15	-0.367993	0.0170978
A230001M10Rik	-1.58932	1.05e-11
Sike1	-0.495186	0.00330412
Csde1	-0.347262	0.00862747
Trim33	-0.473367	0.00135047
Hipk1	-0.442185	0.00284388
Gm43149	-0.848678	0.000464213
Gm15886	-1.14102	0.033044
Gm43387	-0.641074	0.00302311
Dclre1b	-0.441778	0.040543
Bcl2l15	-0.491719	0.0156605
Rsbn1	-0.38061	0.0143174
Phtf1os	-0.614404	0.0145076
Phtf1	-0.462121	0.0066933
Magi3	-0.339238	0.0147595
Gm42696	-0.458138	0.0143283
9530097N15Rik	-0.349496	0.00375757
Gm42699	-0.325653	0.00759309
Gm42702	-0.281938	0.0491132
Gm42701	-0.475008	0.034621
Lrig2	-0.333058	0.0343154
Gm43696	-0.403302	0.0209904
Capza1	-0.327597	0.0415729
St7l	-0.410843	0.00338512
Wnt2b	-1.31366	0.0051341
Kcnd3os	-0.420059	0.0190699
Gm43848	-0.461844	0.0341139
Rap1a	-0.478612	0.00751568
Gm43328	-0.463204	0.00494281
Gm43329	-0.518712	0.0391971
Gm43330	-0.622107	0.000307007
Gm43331	-0.644576	0.00362029
Wdr77	-0.294867	0.0301102
Cept1	-0.472791	0.000144851
Dram2	-0.393053	0.010777
Lrif1	-0.441212	0.00661193
Gm27008	-0.777126	0.00932133
Kcna2	-0.332136	0.0140059
Slc16a4	-1.20306	0.0149769
Rbm15	-0.45926	0.000886713
Kcnc4	-0.45295	0.0491132
Slc6a17	-0.376802	0.035282
Ahcyl1	-0.44613	0.0173418
Eps8l3	-1.08386	0.0382075
4933431E20Rik	-0.352357	0.00254167
Gnai3	-0.576479	0.00819942
Atxn7l2	-0.397081	0.000977938
Sypl2	-0.649135	0.00093561
Gm40123	-0.401014	0.0127088
Psma5	-0.491097	0.0310406
Sort1	-0.449736	0.00442582
5330417C22Rik	-0.33261	0.0183232
1700013F07Rik	-0.786138	0.0246295
Wdr47	-0.457618	0.0119726
Prpf38b	-0.310945	0.0306328
Fam102b	-0.579649	0.000360974
Ntng1	-0.487984	0.000551006
Prmt6	-0.405276	0.0290786
Amy1	-0.526946	0.000191188
Dph5	-0.35867	0.0125072
Extl2	-0.459454	0.0151304
Rtca	-0.360617	0.0382382
Trmt13	-0.455262	0.032766
Sass6	-0.345034	0.0248783
Mfsd14a	-0.430867	0.0206611
Slc35a3	-0.38562	0.00907306
Palmd	-0.369471	0.0307056
Plppr4	-0.601322	4.3e-05
Plppr5	-0.545382	0.00170174
Snx7	-0.453839	0.00607551
Ptbp2	-0.538215	0.000587057
Rwdd3	-0.398444	0.0355216
Tmem56	-0.457922	0.00203392
Abcd3	-0.411641	0.0247035
Arhgap29	-0.4501	0.0276443
Abca4	-0.569234	0.0113591
Gclm	-0.403567	0.00695477
Gm17494	-0.348868	0.00485492
Fnbp1l	-0.435477	0.00191668
Gm43569	-1.25529	0.0339207
Pde5a	-0.583378	0.0064712
4933405D12Rik	-0.49645	0.00920955
Usp53	-0.483513	0.0196451
Mettl14	-0.375842	0.00204183
Gm42825	-1.00264	0.00742884
Ugt8a	-0.628205	0.00964832
Camk2d	-0.368885	0.00771455
Ank2	-0.335859	0.0180043
Gm16958	-1.15602	0.00688498
Larp7	-0.326851	0.036502
Zgrf1	-0.326742	0.0125322
Tifa	-1.04883	0.0113697
Ap1ar	-0.514612	0.000157551
Fam241a	-0.427456	0.00957383
Elovl6	-0.593514	0.00234598
Egf	-0.559196	0.00655607
Rrh	-0.451636	0.00910702
Gar1	-0.534207	2.33e-05
Pla2g12a	-0.394883	0.0117613
Sec24b	-0.404263	0.010528
Gm42997	-0.48638	0.00478493
Cyp2u1	-0.491216	0.00707765
4930534D22Rik	-0.462967	0.000221046
Sgms2	-0.564335	0.0127847
Papss1	-0.514368	0.000153994
Gm29865	-0.457502	0.0277462
Aimp1	-0.423493	0.0387955
Tbck	-0.421579	0.00672808
Gstcd	-0.597301	9.48e-05
Ints12	-0.481637	0.0393529
Ppa2	-0.536922	2.31e-07
Tet2	-0.337949	0.0127959
Gm26691	-0.411225	0.00610392
Gm43192	-1.22194	0.0314825
Slc9b2	-0.421414	0.0110059
Cisd2	-0.545979	0.0028125
4930539J05Rik	-0.704039	0.0264322
Ube2d3	-0.426763	0.0160161
Manba	-0.343975	0.0262162
Nfkb1	-0.462113	0.000808546
Gm31243	-0.922674	0.0428078
Bank1	-0.334779	0.0436887
Ppp3ca	-0.469701	0.000625524
Emcn	-1.17946	0.0160323
Dnajb14	-0.434536	0.00360549
Gm5105	-0.421682	0.0217823
1110002E22Rik	-0.388423	0.0348151
Mttp	-0.546957	0.0391207
Gm43691	-1.33957	0.00932731
Eif4e	-0.504066	0.00191337
Rap1gds1	-0.43295	0.00193186
Stpg2	-0.447055	0.00249226
Unc5c	-0.516201	0.00149631
Bmpr1b	-0.625352	0.000715616
Gbp5	1.22312	0.0277164
Gbp7	3.15898	1.61e-06
Gbp3	4.26695	1.94e-06
Kyat3	-0.348824	0.00959887
Gtf2b	-0.561905	0.00938491
Pkn2	-0.487452	0.0011526
Gm33758	-0.522049	0.0265854
Gm42705	-1.02649	0.0291688
Lmo4	-0.365464	0.0395242
Hs2st1	-0.547875	0.000273686
Gm43707	-0.693301	0.000292636
Selenof	-0.426961	0.0475693
Sh3glb1	-0.394472	0.0210448
Clca3a1	-0.622376	4.59e-05
Clca3a2	-0.937023	0.00215865
Gm43240	-0.866028	0.00731038
Clca4b	-1.4921	0.0173469
Odf2l	-0.502097	0.000614297
Znhit6	-0.543999	0.006371
Syde2	-0.72134	4.08e-07
Ssx2ip	-0.463629	0.00226448
Gng5	1.48758	0.0103736
Rpf1	-0.42821	0.00204707
Samd13	-0.868082	0.00814045
Prkacb	-0.485206	0.00370555
Ttll7	-0.552585	0.00017023
Adgrl2	-0.402932	0.00253923
Gm43573	-0.72839	5.04e-08
Gm5149	-1.02127	0.0117826
Ifi44	6.75913	9.2e-06
Dnajb4	-0.554891	0.00155551
Fubp1	-0.487195	0.0129986
Nexn	-0.880971	0.033297
Miga1	-0.487726	0.00393398
Usp33	-0.381477	0.0138076
Zzz3	-0.539123	0.000122929
AI115009	-0.705382	0.006371
Pigk	-0.650979	0.0111345
St6galnac3	-0.361057	0.0311317
Acadm	-0.383919	0.0251763
Slc44a5	-0.309226	0.0422062
Tyw3	-0.499904	0.0108999
Erich3	-0.322823	0.043668
Lrriq3	-0.699911	0.000298019
4930570G19Rik	-0.378217	0.00488289
Gm15577	-1.31567	0.0218343
Zranb2	-0.508469	0.00958631
Ankrd13c	-0.43177	0.0337961
Srsf11	-0.298434	0.0366999
Lrrc40	-0.492095	0.040587
B230334C09Rik	-0.496498	0.000610558
Lrrc7	-0.416152	0.00288958
Gm20752	-1.10088	0.00244559
Wls	-0.503189	0.00509832
Tmem68	-0.458549	0.00880337
Plag1	-0.49893	0.0018142
Chchd7	-0.591979	0.00320033
A830012C17Rik	-0.557023	0.0370753
Impad1	-0.414839	0.01665
Fam110b	-0.370882	0.00669426
Ubxn2b	-0.471668	0.00799978
Sdcbp	-0.701186	0.00592331
Tox	-0.607684	0.000107412
Gm11802	-1.00046	0.0189542
Rab2a	-0.482437	0.00183041
Chd7	-0.45588	0.0259957
Clvs1	-0.31967	0.0420969
Asph	-0.563971	7.86e-05
4930412C18Rik	-0.61386	0.0430253
2610301B20Rik	-0.456987	0.00199812
Plekhf2	-0.422899	0.0247986
Ndufaf6	-0.388652	0.00890703
Dpy19l4	-0.417363	0.00402868
Virma	-0.369095	0.0106749
Pdp1	-0.59896	0.0372474
Tmem67	-0.326059	0.0413869
Rbm12b2	-0.544023	5.6e-06
Rbm12b1	-0.544052	0.00416275
Fam92a	-0.45506	0.0108046
Triqk	-0.450712	0.00578166
Runx1t1	-0.403396	0.00698513
Slc26a7	-0.839941	7.98e-05
Otud6b	-0.492221	0.00924027
Pip4p2	-0.427131	0.0267162
Necab1	-0.382946	0.0271511
Tmem64	-0.558299	0.0244122
Nbn	-0.49884	0.000589025
Osgin2	-0.415212	0.0374545
Ripk2	-0.434972	0.018787
A530072M11Rik	-0.602945	0.000273027
Gm11861	-1.12763	2.28e-05
Mmp16	-0.385519	0.0195956
Gm11867	-0.819563	8.9e-06
Wwp1	-0.451983	0.00609735
Ccnc	-0.373877	0.0283285
Usp45	-0.443221	0.0121343
Pnisr	-0.608141	1.37e-05
Faxc	-0.316739	0.0286592
Fbxl4	-0.575139	1.14e-05
Pou3f2	-0.299626	0.00503062
Gm30731	-0.539092	0.000168615
Mms22l	-0.599657	0.00129928
Klhl32	-0.421767	0.00678785
C230012O17Rik	-0.595073	0.010803
Gm11906	-0.598068	2.34e-06
Ufl1	-0.622832	1.19e-06
Fut9	-0.347133	0.0179508
Manea	-0.518594	0.0257449
4930548K13Rik	-1.08818	4.45e-05
Epha7	-0.499676	0.00409381
Map3k7	-0.372787	0.00237019
Bach2	-0.4557	0.0130976
Bach2os	-1.3431	0.0456487
Casp8ap2	-0.398287	0.0357344
Mdn1	-0.361122	0.019878
Lyrm2	-0.704323	0.0472658
Rragd	-0.302371	0.0374159
Srsf12	-0.508283	0.00135411
Rngtt	-0.410623	0.0029667
Akirin2	-0.568656	0.00062333
Orc3	-0.46446	0.000838821
Rars2	-0.441751	0.0107432
Slc35a1	-0.465603	0.00620745
Cfap206	-0.660287	0.0020403
Zfp292	-0.351313	0.0171
Mob3b	-0.631425	0.00292804
C9orf72	-0.489174	0.00962547
Gm12367	-0.579203	0.00051833
Lingo2	-0.39984	0.00676113
Gm12371	-0.364749	0.0290855
Aco1	-0.528461	9.97e-05
Ddx58	2.14106	0.000610558
Topors	-0.556455	0.0189098
4933428C19Rik	-1.10345	0.00237019
Aptx	-0.291292	0.0499935
Dnaja1	-0.436899	0.0383241
Nfx1	-0.426359	0.0260372
Ubap2	-0.280008	0.0492466
Fam219a	-0.414986	0.00498555
Gm12404	-1.37859	0.00365994
Dnaic1	-0.438193	0.00328327
Arid3c	0.446201	0.0258637
Ccl27a	-0.397027	0.00768474
Gm13307	-1.0335	0.0216525
Gm12394	-0.861686	0.0355974
Fam205c	-1.31988	0.00751491
Fancg	-0.337261	0.00707781
Stoml2	-0.293135	0.036502
Unc13b	-0.362987	0.00650621
Fam166b	-1.25019	0.000273027
Tesk1	-0.338936	0.0100362
Gm12473	-0.950261	0.0132519
Npr2	-0.28646	0.00942513
Fam221b	-0.485961	0.0215923
Tmem8b	-0.462394	0.00251422
Reck	-0.475039	0.00272646
Gne	-0.477923	0.0113879
Rnf38	-0.41512	0.00895181
Melk	-0.673027	0.00721648
Zcchc7	-0.416294	0.000820806
Frmpd1	-0.36105	0.0471536
Trmt10b	-0.575407	0.0397053
Dcaf10	-0.371821	0.0118824
Slc25a51	-0.479431	0.00243195
Shb	-0.324893	0.0365841
Tmod1	-0.555449	0.000183233
Tstd2	-0.453065	0.00316213
Ncbp1	-0.372136	0.0168646
Xpa	-0.573435	0.0358874
Gm12446	-1.21009	0.0145487
Anp32b	-0.221076	0.0206117
Gabbr2	-0.377961	0.0281449
Galnt12	-0.493746	0.0276143
Nr4a3	-1.21729	0.0313968
Stx17	-0.467218	0.00172888
Erp44	-0.42539	0.00178164
Invs	-0.48246	0.00281184
Tex10	-0.401356	0.0334215
Msantd3	-0.404015	0.00699803
Tmeff1	-0.545228	0.00034098
Cavin4	-0.604602	0.000546121
Plppr1	-0.759592	1.05e-05
Aldob	-0.551442	0.020783
Grin3a	-0.47005	0.0123577
Smc2	-0.537159	0.000178322
Slc44a1	-0.464623	0.00260376
Fsd1l	-0.537405	0.00019433
Fktn	-0.459654	0.000570475
Tmem38b	-0.433991	0.0104245
Rad23b	-0.484169	0.00053849
Elp1	-0.291074	0.0241863
Abitram	-0.432759	0.0475693
Ctnnal1	-0.450158	0.00615576
Tmem245	-0.383242	0.00540884
Frrs1l	-0.504318	3.99e-05
Epb41l4b	-0.400155	0.0255476
Ptpn3	-0.461872	0.00188017
Gm12536	-0.570955	0.0118676
Pakap.1	-0.351391	0.000785938
Gm12526	-1.24398	0.0065641
Ecpas	-0.425274	0.00233079
Zkscan16	-0.69121	0.000124307
Dnajc25	-0.412384	0.0392965
Ugcg	-0.472886	0.000543423
Susd1	-0.543066	1.86e-05
Ptbp3	-0.416848	0.0247048
E130308A19Rik	-0.425821	0.0123476
Inip	-0.378503	0.0419485
Gm12542	-1.30446	0.0134075
Fkbp15	-0.389422	0.00456362
Slc31a1	-0.396618	0.0229877
Prpf4	-0.359598	0.0348311
Alad	-0.470188	0.00924211
Whrn	-0.401546	0.00964091
Astn2	-0.540793	2.02e-05
Trim32	-0.707378	0.000937274
Brinp1	-0.508144	0.000885609
Cdk5rap2	-0.33924	0.0320246
Megf9	-0.315515	0.0122059
Tle1	-0.536736	0.00144108
C630043F03Rik	-0.651443	0.0168003
Frmd3	-0.555859	9.15e-06
Kdm4c	-0.468556	0.000238369
Ptprd	-0.397086	0.00425601
Gm42303	-1.30196	0.0104851
Lurap1l	-0.342108	0.0240272
Mpdz	-0.492137	0.00316308
Nfib	-0.419901	0.00501622
Gm11266	-0.778176	2.38e-05
Zdhhc21	-0.55634	3.26e-05
Frem1	-0.428308	0.0301665
Ttc39b	-0.507685	8.11e-05
Snapc3	-0.34306	0.00822693
Psip1	-0.45631	0.00487396
Cntln	-0.597882	7.07e-06
Sh3gl2	-0.312937	0.0284277
Saxo1	-0.845654	0.00696412
Haus6	-0.520201	0.000986342
Dennd4c	-0.467305	0.0161334
Slc24a2	-0.406012	0.00504913
Gm12631	-0.944269	0.000162904
Focad	-0.331831	0.0217671
Hacd4	-1.21987	0.0356522
Gm49890	-0.538355	0.00888905
Elavl2	-0.634355	1.73e-07
Gm12655	-0.54775	8.21e-06
Caap1	-0.477253	0.00173146
Plaa	-0.530922	0.000540514
Ift74	-0.329802	0.0155883
Tek	-1.29218	0.0222767
Eqtn	-0.338308	0.0204695
Mysm1	-0.524969	0.0051267
Fggy	-0.460146	0.00399983
Hook1	-0.392282	0.00319826
Cyp2j6	-0.420056	0.0194978
E130114P18Rik	-0.5299	0.0458846
Nfia	-0.468902	0.00194891
Tm2d1	-0.47161	0.0483923
Patj	-0.496424	0.000983798
Usp1	-0.578931	0.0304729
Dock7	-0.393297	0.0109442
Angptl3	-1.34833	0.00815744
Gm12681	-1.47215	0.00253501
Atg4c	-0.548854	0.000210652
Alg6	-0.552274	0.0010373
Efcab7	-0.459248	0.000430554
Pgm1	-0.351044	0.0152852
Ror1	-0.495232	0.0328873
Jak1	-0.321435	0.036395
0610043K17Rik	-0.559387	0.0272116
Ak4	-0.61098	0.00621538
Dnajc6	-0.378116	0.00962814
Lepr	-0.6842	0.00287539
Pde4b	-0.537229	0.00030389
Sgip1	-0.331621	0.0162245
Gm12709	-0.996391	0.0385838
Wdr78	-0.429438	0.00829051
Mier1	-0.433119	0.0126085
Slc35d1	-0.485305	0.030985
Gm44037	-0.439234	0.00294473
Oma1	-0.333863	0.0344348
Fyb2	-0.584481	0.0384585
Prkaa2	-0.387939	0.00962888
Usp24	-0.392993	0.0106699
Pcsk9	-1.24273	4.55e-06
Dhcr24	-0.550672	0.00482168
Ttc4	-0.335815	0.0296196
Gm12786	-1.19382	0.00621538
Tceanc2	-0.387218	0.0187039
Lrrc42	-0.301905	0.0331677
Hspb11	-0.430654	0.00418898
Ndc1	-0.222539	0.0466064
1700047F07Rik	-0.551207	0.00267539
Magoh	-0.501581	0.0450188
Czib	-0.268368	0.0384807
Zyg11b	-0.334634	0.0417569
Tut4	-0.418187	0.00235861
Prpf38a	-0.515908	0.0168694
Zfyve9	-0.317489	0.0181825
Btf3l4	-0.527129	0.0310448
Rab3b	-0.489342	0.0119993
Nrd1	-0.510825	0.00270528
Osbpl9	-0.391711	0.00103445
Eps15	-0.446578	0.0413259
Rnf11	-0.497413	0.0024864
Gm12811	-0.832013	0.00243195
Faf1	-0.44949	0.000459071
Elavl4	-0.551743	2.56e-06
Agbl4	-0.487876	0.000459071
Bend5	-0.475313	0.000574794
Skint5	-0.393341	0.0140348
Skint11	-1.17224	0.0063033
Cmpk1	-0.512016	0.00455715
Stil	-0.57479	0.00402703
Cyp4x1	-0.545826	0.00124309
Cyp4b1	-0.556421	0.0441981
Efcab14	-0.473924	0.00880741
Atpaf1	-0.408837	0.020699
Rad54l	-0.813255	1.38e-05
Pomgnt1	-0.301286	0.0429465
Lurap1	-0.735346	0.0398325
Pik3r3	-0.393551	0.0231272
Mast2	-0.405472	0.00452248
Ipp	-0.345825	0.0247179
Gpbp1l1	-0.331451	0.037208
C530005A16Rik	-0.844156	0.00844116
Nasp	-0.410146	0.00288958
Gm12996	-0.974179	0.0103369
Zswim5	-0.442598	0.000625524
Hectd3	-0.41346	0.00502333
Armh1	-0.601045	0.0171349
Tmem53	-0.515696	0.0297582
Rnf220	-0.526863	0.00423927
Eri3	-0.341496	0.0337242
Gm17114	-1.37544	0.00432112
Gm12841	-0.834604	0.0176408
9530034E10Rik	-1.07573	0.0104608
Ybx1	-0.457791	0.0058812
Ccdc30	-0.36128	0.0216463
BX470216.1	-1.59544	0.00751568
Zmynd12	-0.608071	0.00621483
Rimkla	-0.358611	0.0230115
Frg2f1	-0.56428	0.0114258
Foxj3	-0.506833	0.00100112
Scmh1	-0.385921	0.00452301
Ctps	-0.426288	0.0124721
Gm45579	-0.484299	0.0182775
Nfyc	-0.430355	0.00161233
Rims3	-0.420976	0.0302365
Smap2	-0.397975	0.0242283
Zmpste24	-0.292228	0.0225528
Rlf	-0.412776	0.00685966
Ppt1	-0.543545	0.016972
Hpcal4	-0.42067	0.0371982
Bmp8a	-0.533777	0.00713146
Gm12925	-1.07437	0.0103914
Gm12905	-0.486762	0.0172381
Rragc	-0.529638	0.000519909
Utp11	-0.522069	0.0108786
Gm12915	-0.801158	0.000427122
Mtf1	-0.48626	0.0348888
Maneal	-0.354535	0.045565
1700125G02Rik	-0.886439	0.00425269
Gm12930	-0.62939	0.00211576
Rspo1	-0.774616	0.00155156
Gnl2	-0.336519	0.0142535
Meaf6	-0.350869	0.026068
2610028E06Rik	0.746176	0.00105997
Oscp1	-0.440461	0.0054203
Thrap3	-0.292166	0.0279524
Tekt2	0.540917	0.0483765
Ago3	-0.354089	0.0217823
Ago1	-0.33102	0.00799978
Ago4	-0.380235	0.00336594
5730409E04Rik	-0.371994	0.0116252
Psmb2	-0.429582	0.0309483
Tfap2e	-1.17741	0.0364661
Zmym4	-0.308868	0.0139936
Sfpq	-0.464464	0.00382418
Zmym6	-0.294724	0.0434115
Tmem35b	-0.311528	0.0273918
Csmd2os	-1.22295	0.00323323
Hmgb4	-1.22193	0.00949682
Phc2	-0.34227	0.0246828
Zfp362	-0.409713	0.00295497
Gm15904	-1.46922	0.00375931
Ak2	-0.488823	0.0412465
1700086P04Rik	-0.595342	0.00511994
Rnf19b	-0.416038	0.024274
S100pbp	-0.390262	0.00146126
C77080	-0.424317	0.047797
Gm12976	-0.909945	0.0145582
Rbbp4	-0.343937	0.00478807
Zbtb8a	-0.58648	1.32e-05
Iqcc	-0.507625	0.0430253
Khdrbs1	-0.367564	0.0208299
Ptp4a2	-0.451051	0.0172035
Gm12963	-0.435036	0.00726585
Pum1	-0.313765	0.0317158
Srsf4	-0.453027	0.00150439
Gm12992	-0.820662	4.15e-09
Epb41	-0.407118	0.00621538
Rab42	-1.07549	0.0478546
Eya3	-0.405002	0.00779234
Fam76a	-0.417922	0.0395606
Gpn2	-0.580851	0.00220221
Dhdds	-0.363337	0.0255176
Pdik1l	-0.496071	0.00575369
Pafah2	-0.343389	0.0152106
Paqr7	-0.352515	0.0154602
Aunip	-0.457925	0.00678785
Mtfr1l	-0.394946	0.0424659
Maco1	-0.369397	0.00856903
Rsrp1	-0.416685	0.00022556
Srrm1	-0.313093	0.0117146
Stpg1	-0.487824	0.0211053
Ifnlr1	0.921014	0.038674
Srsf10	-0.440173	0.00911288
Hnrnpr	-0.442987	0.00127622
Luzp1	-0.496313	0.0108777
C1qb	1.46337	0.0356869
Wnt4	-0.402171	0.0372457
Cdc42	-0.450688	0.0304625
Usp48	-0.435603	0.00300868
Rap1gapos	-1.74525	0.00258278
Ece1	-0.392445	0.0213411
Eif4g3	-0.311158	0.0267162
Hp1bp3	-0.307062	0.0152132
Otud3	-0.530034	0.00319826
Micos10	-0.267715	0.0431553
Emc1	-0.344254	0.0155789
Arhgef10l	-0.347209	0.040587
Rcc2	-0.426304	0.0246582
Padi2	-0.566622	0.00539469
Gm13031	-0.602895	0.0458846
Spata21	-0.508998	0.00644769
Gm13075	-1.34899	0.000360075
Ddi2	-0.539602	0.000743597
Agmat	-0.540661	0.0465484
Casp9	-0.392604	0.00702325
Efhd2	-0.599138	0.0255422
Gm29367	-0.905929	0.0216077
Kazn	-0.338103	5.01e-05
Prdm2	-0.423785	0.00587246
Vps13d	-0.337424	0.0260372
Zfp991	-0.499206	0.0100504
Zfp982	-0.670112	0.00308371
Zfp933	-0.355002	0.0447696
Clcn6	-0.377448	0.0325717
Ubiad1	-0.47433	0.000658262
Mtor	-0.318679	0.0417896
Angptl7	-0.96169	0.0123285
Exosc10	-0.379864	0.0313932
Masp2	-0.710217	0.0307893
Tardbp	-0.44515	0.00092088
Casz1	-0.579726	0.0259346
Gm13205	-0.503876	0.0120999
Gm17029	-1.0285	0.0491132
Pex14	-0.310686	0.0279358
Kif1b	-0.414232	0.00540884
Lzic	-0.432088	0.0309528
Ctnnbip1	-0.344874	0.0212705
Clstn1	-0.34967	0.00609735
Gm13067	-0.596247	0.000554068
Rere	-0.305767	0.017977
Camta1	-0.374101	0.0194002
4930589P08Rik	-1.44676	0.00529872
Phf13	-0.704758	0.0146796
Klhl21	-0.496719	0.0470244
Plekhg5	-0.438553	0.0235358
Icmt	-0.473493	0.00622815
Nphp4	-0.355637	0.00900256
Dffb	-0.466219	0.00671154
Cep104	-0.417257	0.025013
Smim1	-0.794296	0.00591958
Ccdc27	-0.886718	0.00589818
Prdm16	-0.676327	0.00862633
5830444B04Rik	-0.995331	0.0147412
Gnb1	-0.248359	0.0488139
Mmp23	0.535101	0.0291016
Sdf4	-0.356005	0.0209633
Tnfrsf4	-0.3555	0.0398364
Tnfrsf18	-1.31025	0.0203932
Isg15	3.10935	0.000178322
AW011738	0.71995	0.0100684
Fam133b	-0.282406	0.0230176
[truncated: 5,838 more rows]

## Sheet: mPFC_InhibitoryNeuron_YTvYC
gene	logFC_groupYoung_Tumor	FDR_groupYoung_Tumor
Ncl	-0.393869	0.0136308
D630008O14Rik	-1.21749	0.0174685
Fibcd1	-1.25868	0.0136424
Tor2a	-0.538636	0.023806
Bdnf	-1.30635	0.0242643
Ltk	-0.749184	0.0174685
Amigo1	-0.489277	0.00809028
Npnt	-0.806089	0.0174685
A2m	3.11773	0.00809028
C030029H02Rik	-1.64453	0.000871396
Mef2b	-0.660128	0.0389845
Adamts8	-1.02333	0.00183712
Sumo3	-0.461123	0.00114294
Slc35e4	-0.946657	0.020226
Cdk5r1	-0.559599	0.000106977
Neurod2	-1.08207	0.00551122
Igfbp4	-0.522034	0.0242643
Gfap	2.78899	4.06e-06
Evpl	-1.29896	0.0152237
Egr3	-1.32127	0.00593879
C4b	2.65874	0.000871396
Casp7	-0.689522	0.0152237
Slc7a3	-0.645727	0.00793781
Asb11	-1.60332	0.0242984

## Sheet: mPFC_InhibitoryNeuron_ATvAC
gene	logFC_groupAged_Tumor	FDR_groupAged_Tumor
St18	-1.85023	0.002034
Gm973	-1.76846	0.0497179
Syt2	-0.804054	0.0400177
Tmem63a	-1.9613	0.002034
Cerkl	-1.33753	0.0497179
Prr5l	-1.752	0.00871465
Gatm	-0.958128	0.0147519
A230001M10Rik	-2.31164	0.00871465
Ugt8a	-1.44899	0.00891786
Col24a1	-0.890746	0.0245264
Pde4b	-0.867847	0.00871465
Antxr1	-0.56428	0.0479538
Lig1	-0.649466	0.00752916
Pde8a	-1.15769	0.00185583
D7Ertd443e	-1.54854	0.000513782
Dock1	-0.90966	0.0167511
C030029H02Rik	-3.05835	4.56932e-07
Ddx60	2.90604	0.00871465
Usp2	-0.622543	0.0400177
Gm42756	-2.36859	0.0211639
Mypn	-0.74271	0.0400177
Stat2	1.50838	0.00195773
Gfap	3.51677	0.000350974
Abca8a	-1.4027	0.0357647
Rnf213	2.29821	0.0167511
Arhgdia	0.83709	0.0400177
9330111N05Rik	-1.09999	0.00871465
Mir124a-1hg	-0.416652	0.0400177
Kcnv1	-1.53563	0.00168205
4930420G21Rik	-2.29627	0.00112354
Dagla	-0.581159	0.0479538
Ifit1	3.48581	0.00891786
Opalin	-2.12146	0.00752916
Rbm20	-0.837276	0.0304846
Cdr1	-1.0678	0.0104753
Plp1	-1.30087	0.0349795
Gm47283	-1.12908	0.0243708

## Sheet: mPFC_Astrocyte_YTvYC
gene	logFC_groupYoung_Tumor	FDR_groupYoung_Tumor
Cxcl10	6.26872	0.000119512
Gm4951	5.767	1.26e-09
Iigp1	5.74233	1.63e-05
4930578G10Rik	-2.41554	0.000547416
Usp18	5.33501	1.17e-06
Ifi44	5.31851	5.11e-05
Gm48972	5.27051	0.0194625
Slfn8	5.23611	0.00251367
D030055H07Rik	-2.0369	0.00621475
Oasl2	5.23306	3.97e-08
Abca8a	-1.83664	0.0229157
C3	5.12151	0.00199463
Gm50237	5.05918	0.00536398
Nox4	4.97214	1.84e-07
F830016B08Rik	4.70097	0.000119512
Mlkl	4.64841	0.0231195
Ckap2	4.49345	0.00733087
Hmmr	4.47634	0.0298651
Mfge8	-1.73119	7.99e-05
Isg15	4.42266	0.00142723
Gm20559	4.38249	1.24e-06
Casp12	4.3571	0.0011397
4931423N10Rik	-1.59796	0.00579761
Ifit1	4.31712	3.05e-06
Shisa2	-1.53089	0.0470946
Ddx60	4.24009	6.09e-11
Oas2	4.21231	0.00318656
Bcl3	4.2038	1.29e-05
Trim30a	4.09345	4.19e-08
Timp1	4.092	0.00647517
Plscr2	4.03705	8.58e-07
Socs3	3.94037	1.63e-05
Gm36372	-1.44615	0.0445322
Top2a	3.89621	0.0468341
Styk1	3.79065	0.0080719
Cebpd	3.7578	2.86e-05
Ifit3	3.63194	0.000232771
Bbox1	-1.38099	0.0326096
C1qtnf1	3.61853	0.00822506
Irf7	3.61616	7.62e-05
Samd9l	3.59911	7.29e-05
Parp14	3.57903	2.85e-05
Icam1	3.54791	0.00392446
Dhrs3	-1.23454	0.0190501
Nlrc5	3.50784	1.95e-06
A2m	3.48996	3.19e-08
Cyp1b1	3.48895	0.0222197
Slco1a5	3.48851	0.0011397
Arhgap11a	3.48739	0.0326096
Serpina3n	3.487	1.9e-05
Bst2	3.42178	0.000819041
Lpo	3.42091	0.0237146
Slco1a6	3.41982	0.020912
Slfn9	3.38477	0.00448512
Cp	3.37118	1.16e-06
Ccl12	3.34447	0.0186581
Slc43a3	3.34179	0.00141636
Aspg	3.33566	2.05e-14
Rsad2	3.33463	0.00126772
Flrt1	-0.991561	0.013209
Gbp8	3.31698	0.0293759
Hhip	-0.977589	0.0304101
Gbp6	3.31636	0.000277971
Trim30d	3.26134	6.2e-05
Cd52	3.22589	0.0366244
Gbp5	3.20253	0.00662683
Gm45740	3.18516	0.00100562
H2-Q7	3.16112	0.0474631
Gbp3	3.12423	7.74e-05
Melk	3.12258	0.0200869
Fam184b	-0.95324	0.0151498
Sned1	-0.944214	0.00478837
Acss2	-0.939266	0.012926
Cenph	3.09272	0.0298651
Lgals9	3.0747	0.00505555
Gm45708	-0.929837	0.000786209
Uhrf1	3.03749	0.0470106
Gm43154	3.03483	0.000109694
Alpl	-0.926162	0.0178663
Osmr	3.02809	1.5e-07
Ifitm3	3.00981	0.00100562
Irgm1	3.00816	1.56e-05
H2-Q4	3.00631	0.00939515
Ifitm10	2.99256	1.95e-06
Tgm1	2.97763	0.00573361
Map3k8	2.88884	0.000540917
Gbp2	2.8692	0.0422782
Flnc	2.85383	0.0169339
Sulf1	2.84181	8.54e-08
Irgm2	2.84155	0.00989311
Parp10	2.81669	0.00140179
Ifit3b	2.8145	0.0142562
Spp1	2.81324	0.0326096
Uba7	2.81089	0.0104585
Adam12	2.75249	0.000174384
Ifi35	2.75226	0.00488352
Morrbid	2.71824	0.01955
Atf7ip2	2.69511	0.0312595
Psmb8	2.68178	0.0118001
Gm42047	2.65259	0.0255989
Avil	2.60304	0.0106139
Sbno2	2.59952	8.58e-07
Ifit2	2.59594	0.0222197
Thbs2	2.59342	0.012926
Ier3	2.58827	0.0323362
Clec2d	2.58734	0.0134696
Gldn	2.58201	0.00017544
Chl1	2.57814	2.81e-08
Anxa3	2.57738	0.00478837
Serping1	2.56468	0.0232475
Helz2	2.55612	0.0366244
Rad51ap1	2.5082	0.0326096
Gm30606	-0.907274	0.00219674
Col11a2	-0.885237	0.0189607
Casp8	2.49771	0.00108372
Xaf1	2.49084	0.00478837
Vim	2.48455	0.00737499
Tent5a	2.47247	0.0447826
Trim34a	2.4327	0.00157495
Tagln2	2.42615	0.0325065
Gm28151	-0.885138	0.00300626
Gm44148	2.417	0.0299539
Il1r1	2.40738	0.000174384
Hmox1	2.40721	0.02744
C530044C16Rik	2.40573	0.0112204
Fkbp5	2.39474	0.00109927
Junb	2.391	0.0200869
Olfr1033	2.38481	0.0442261
Traf1	2.37775	0.00122509
Gm48623	-0.875503	0.041696
Il6ra	2.34272	0.0169515
Dhx58	2.29636	0.028924
Adgrg6	2.29094	2.86e-05
Kif11	2.28588	0.0493342
Zc3hav1	2.27842	0.0112204
Ccn1	2.27826	0.0383435
Adgrv1	2.27804	0.0329068
Gad1	-0.855073	0.00785349
C130073E24Rik	-0.853026	0.00144319
Tap1	2.26769	0.0255989
Mill2	2.2505	0.0191131
Shisa6	2.23728	0.000277971
9530052E02Rik	2.21375	0.000174384
Emx2os	-0.808139	0.00536172
Gm49518	2.21108	0.000448548
Ddx58	2.19372	0.00717494
Trmt9b	-0.802387	0.0299539
Shisal1	-0.77437	0.0023995
Cd44	2.18342	0.000461923
Gfap	2.17717	7.74e-05
Fas	2.1762	0.00132514
Mboat1	2.16571	0.0356414
Tmem82	-0.703344	0.0470946
S1pr3	2.16059	0.0118001
Gm16310	2.13326	0.0105247
Net1	2.11393	0.000547416
Gm13052	2.11117	0.0022219
Ifi27	2.11109	0.000388747
Plce1	2.09929	2.07e-05
Syne3	2.09818	0.0244644
Ifih1	2.0963	0.00865322
Parp9	2.08523	0.00737499
S100a11	2.08219	0.0418304
Hist2h3c1	2.06601	0.0470946
Cpeb4	-0.701689	0.021175
Parp3	2.06235	0.0325065
Ssc5d	2.05709	0.0142562
Esr1	2.01187	0.0386448
Plekha4	1.99637	0.0263493
Gbp7	1.99061	0.0185982
Stat1	1.98203	0.0151498
Ggta1	1.98197	0.000174384
Gm12296	1.9762	0.000772389
Ifitm7	1.97164	0.0469615
Ctss	1.95924	0.0299539
Fos	1.95913	0.0218205
Bace2	1.95158	0.0151498
B230312C02Rik	1.95003	0.0119031
Kif21b	-0.667934	0.012926
P4ha3	1.93566	0.0418304
Dnah9	1.912	0.000789748
Pappa	1.90511	0.0297445
Psrc1	1.90501	0.0257616
Ttc39c	-0.641073	0.0222711
Il3ra	1.89956	0.0221891
Gadl1	1.89169	0.00321806
Col4a6	1.88327	0.0170445
Cchcr1	1.88052	0.000109694
Atp10a	1.83111	0.0155528
Trim25	1.82726	0.0212447
Slc5a3	1.82319	0.00108372
Stat2	1.79226	0.0080719
Alk	1.79068	0.000737677
Irf9	1.78348	0.0164922
Adamtsl3	1.77562	0.00414844
Met	1.76259	0.0030395
Aebp1	1.75058	0.00785349
Slc16a6	1.73889	0.00318656
Tmem108	1.73603	2.07e-05
Cpne8	1.7332	2.85e-05
Nhs	1.69327	2.25e-05
Herc6	1.67055	0.0218205
Fgd3	1.66139	0.00768529
Asap3	1.65748	0.000750759
Mrps6	1.64902	0.00525634
Usp43	1.63553	0.0181619
Klf5	1.57927	0.00792996
C4b	1.57126	0.000119512
Dysf	1.57064	0.0185681
Peg3	-0.623338	6.09e-11
Grm5	1.56963	0.000252506
Gm46210	1.55646	0.0150486
Vmn2r29	-0.614153	0.0366244
Dock10	1.55009	0.0177403
Ctps	1.53059	0.0309989
Adamtsl1	1.47811	0.00478837
Spsb1	1.47645	0.0148996
Cdc7	1.44917	0.00974037
Kazn	1.4417	0.0172248
Sec16b	1.43974	0.0329068
Slc39a14	1.42075	0.00118762
Lypla2	1.42041	0.0206716
Shc4	1.40443	0.0430184
Angpt1	1.3921	0.0458535
Rhobtb1	1.38741	0.00223077
Neto2	1.34509	0.000421184
Arntl	-0.6052	0.0474305
Tcirg1	1.33491	0.0325065
Ephb2	1.32086	0.0339209
Sorbs1	1.3204	0.00827923
Prr5l	1.31288	0.0148996
Afap1l2	1.29664	0.0298651
Sorcs1	1.28882	1.31e-05
Shisa9	-0.550262	4.14e-07
Slc22a4	1.26994	0.0151498
Sgcd	1.26916	0.00240634
Slc7a8	1.25868	0.00226508
Lama4	1.24621	0.0474305
Gabbr2	-0.548016	0.00219674
Dennd3	1.24344	0.0229094
Cacnb2	1.23226	0.00525634
Col12a1	1.22768	0.00702671
Apbb1ip	1.22386	0.0469615
Add3	1.21176	0.012926
Nfasc	1.2106	0.00470666
Dpysl4	1.19435	0.0118025
Sntg2	1.18571	0.00034353
Ntng1	1.17751	0.00240634
Igsf21	-0.533393	0.0221891
Iqgap2	1.17315	3.84e-05
Syt6	1.15071	0.0474264
Slc9a5	1.13503	0.0266706
Rgl1	1.1297	0.00747193
Dcc	-0.516799	0.0118001
Stat3	1.12952	0.0469615
Noct	1.12148	0.0227306
Rbp1	1.1201	0.048852
Sel1l3	1.11506	0.00213665
Ncam2	1.11505	0.00908689
Tmem200a	1.10826	0.00509315
Tmeff1	1.10405	0.0470946
Man1a	1.07623	0.00318656
Lrriq1	1.06959	0.0418304
Zdhhc23	1.05291	0.00141636
Abca8b	1.04588	0.0317767
Cacna2d3	1.03017	0.00447037
Ak5	1.01691	0.000777332
Msrb3	1.01181	0.0105247
Dyrk2	-0.512395	0.00579761
Jag2	1.00568	0.0137578
Shfl	1.00265	0.0299539
Tmeff2	0.97465	0.0254548
Tmem132c	0.96337	0.0348641
Arid5b	0.939713	0.0230453
Pcgf2	0.935316	0.0274817
Rapgef4	0.933788	0.0080719
Bmerb1	0.932105	0.00218173
Skap2	0.923141	0.0410732
1110018N20Rik	0.910605	0.042154
Rtn2	0.903986	0.00318656
Camkk2	0.896665	0.033929
Ptprj	0.876925	0.0325112
Slc35f3	-0.496419	7.74e-05
Kcnj3	-0.481029	0.0333695
Nalcn	0.85187	0.0035652
Sytl2	0.769302	0.0385337
Shank3	0.745114	0.00599779
Gm10635	0.741702	0.00544284
Nol4	-0.448612	0.0178656
Myo1d	0.737786	0.00051976
Gucy1a1	-0.396815	0.0299539
Slc8a1	0.710366	0.00106729
Trpm4	0.696469	0.0184931
Cadps	0.693065	0.0114861
Gm10862	0.688984	0.0316878
Pdlim7	0.683284	0.0080719
Aff3	0.677212	0.00227965
Grik4	0.675515	0.0326096
Pdzrn3	0.66967	0.0114469
Trim8	-0.278899	0.0218387
Lrp1b	0.570074	0.0433485
Unc79	0.568633	0.01955
Adcy9	0.559039	0.0375222
Kcnma1	-0.241972	0.0297024
Oxr1	0.551062	0.0144658
Fmn1	0.538068	6.57e-05
Prickle2	0.532872	0.0365548
Enox1	0.526738	0.0147073
Smarca1	0.291617	0.0448135

## Sheet: mPFC_Astrocyte_ATvAC
gene	logFC_groupAged_Tumor	FDR_groupAged_Tumor
Lsamp	-0.829154	0.000976509
Cadm2	-0.554701	0.0346866
Pcdh9	-0.563808	0.00512044
Fth1	1.16611	0.0080438
Adgrb3	-0.501794	0.0426398
Ntm	-0.91869	0.000753862
Il1rapl1	-0.514153	0.0183461
Mt3	1.23218	0.000741163
Gpc5	-1.08076	0.000918588
Dmd	-0.534766	0.0183985
Mt1	1.48017	0.0172807
Plcb1	-0.582629	0.00580759
Pcdh7	-0.6308	0.0130204
Negr1	-0.574778	0.0288604
Auts2	-0.731863	0.0037192
Cadm1	-0.752484	0.00509871
Pbx1	-0.637981	0.0493066
Gfap	1.98551	0.000339931
Tmsb4x	1.47255	0.0239814
Dgkb	-0.903037	0.00326926
Kcnd2	-0.543302	0.0057051
Dbi	1.57095	1.66e-05
Msi2	-0.91164	0.000941926
Grik2	-0.529199	3.5e-09
Dtna	-0.851077	0.0321568
Gpc6	-0.56985	0.0285863
Chl1	1.83543	0.000193612
Tspan7	-0.999438	0.0127683
Akt3	-0.568753	0.0152974
Cox8a	1.30025	0.0104719
Dennd1a	-0.708371	0.00915592
Dab1	-0.601555	1.66e-05
Gnao1	-0.763152	0.0101909
Ppp2r2b	-0.583263	0.0467273
Fmn2	-0.882709	0.00201615
Pnisr	-0.942628	0.0417437
Selenow	1.04893	0.00192695
Dcc	-0.957688	2.48e-09
4930402H24Rik	-0.81675	0.0424553
Actb	0.908752	0.00912084
Adcy2	-0.864393	0.00354591
Hdac9	-0.577569	0.000731334
Arhgap5	-1.08665	0.00798432
Fut9	-0.680603	0.0130886
Ccdc88a	-0.746007	0.0424553
Plce1	1.47977	0.00512809
Phlpp1	-0.858393	0.0423097
Robo2	-0.643363	9.08e-05
Zeb1	-0.93802	0.00798857
Mast4	-0.647997	0.00201615
Prkn	-0.645609	0.0186509
Clasp2	-0.805157	0.00526442
Trim9	-0.665808	0.0457554
Cox4i1	1.1169	0.0332916
Ppia	1.2841	0.0404627
Fau	1.21048	0.00200413
Fbxl17	-0.626389	0.0104719
Tox	-0.742512	0.00421953
Cpeb4	-1.06933	1.23e-05
Rfx3	-0.670858	0.0238858
Sparcl1	-1.06886	0.0424553
Luc7l3	-0.86864	0.00717863
Hdac8	-0.822408	0.0430935
Kmt2c	-0.695768	0.047143
Bmpr1b	-0.825126	0.0415985
Ubb	1.65416	0.0165434
Klf12	-0.636736	0.0426955
Nol4	-0.860506	2.75e-09
Ssbp2	-0.734386	0.0013653
Lama2	-0.931666	0.0315459
C4b	0.926058	0.0427854
Gapdh	1.42361	0.000339931
Pcsk1n	1.29359	0.0018254
Alcam	-0.740109	0.000961717
Fat3	-0.665698	3.59e-09
Ralgapa1	-0.570188	0.0493123
Pde8b	-0.662639	0.0247112
Kcnj3	-0.806946	3.03e-06
Lrba	-0.685061	0.00746349
Kmt2e	-0.670966	0.0465251
Arhgap26	-0.624832	0.00751282
Glud1	-1.00053	0.0242959
Adam23	-0.928792	0.000647623
Acsl3	-1.06001	0.0422371
Mgll	-1.0391	0.00265804
Grid1	-0.532482	0.0305631
Bcan	-1.11541	0.00163515
Fars2	-0.790554	0.0404627
Ftl1	1.51216	0.00415098
Myl6	0.770659	0.0352256
Kif5a	0.802561	0.00607823
Tuba1a	1.91458	0.000491999
Smyd3	-0.521175	0.000731334
Pou2f1	-0.934094	0.0198751
Unc5c	-0.658122	0.0169465
Bicd1	-0.531455	0.0050338
Stat2	1.64489	0.0107034
Cttnbp2	-0.521702	0.00281821
Cep85l	-0.774991	0.0356451
Csgalnact1	-0.694587	0.0419701
Otud7a	-0.671952	8.41e-07
Rnf213	1.71158	0.0344723
Shank1	0.611639	0.00562357
Gm6145	-1.25884	0.00955286
Fgf13	-1.00108	0.00199748
Fam49b	-0.661603	0.00521716
Appl2	-1.41205	0.00421953
Kcnn2	-0.896476	0.0200713
Rfx7	-0.648421	0.0285311
Jarid2	-0.687592	0.00292418
Nwd1	-0.850206	0.0448311
Eps15	-1.10591	0.00817096
Ephb1	-0.898531	0.0321568
Sfpq	-0.646878	0.00137795
Mical2	-0.696249	0.0201912
Ube3a	-0.797479	0.0466834
Fam13c	-0.944325	0.0108402
Slco1c1	-1.23592	0.0165849
Cdh11	-0.611466	4.76e-11
Ddx60	2.96184	1.07e-05
Cdk13	-0.563266	0.0493123
Slc39a14	1.06558	0.0189958
Phactr3	-1.06278	5.77e-05
Prr16	-0.550913	1.21e-06
Gtdc1	-0.539132	6.93e-07
Cfl1	1.3626	0.00825733
Cpsf6	-0.638522	0.0198751
Pcmtd1	-0.800453	0.0153906
Tut4	-0.664979	0.0418878
Vegfa	-0.910186	0.0216752
Pcdh11x	-0.883755	0.00616738
Tmem164	-0.87339	0.0245942
Gpx4	0.800444	0.0442848
Fabp7	1.6892	0.0145834
Rsf1	-0.656322	0.0493123
Wnk2	-0.759916	0.0233094
Grk3	-0.812956	0.00616738
Vim	3.114	0.000233071
Ylpm1	-0.594393	0.00983749
Dach1	-0.880891	0.0142845
Mib1	-0.68683	0.0268466
4930488L21Rik	-1.50177	3.87e-06
Cnot2	-0.589905	0.0414021
Gm5089	-0.922856	0.0247573
Abl2	-0.640908	0.0183985
Gabbr2	-0.89574	2.48e-09
Sulf1	1.93576	0.000731334
Slc7a10	-0.704855	0.0421947
Cox6b1	0.914696	0.021652
Acss1	-0.725784	0.0418878
Med12l	-0.509195	0.034194
Rab30	-0.845423	0.0270204
Ythdf3	-0.55272	0.0330795
Ppargc1a	-0.879632	0.0390637
Cox6a1	1.35194	0.00450416
Atf2	-0.594325	0.0368805
Ntsr2	-1.24481	0.00945303
Fam135a	-0.672756	0.0211563
Cox5b	1.32938	0.000632008
Pea15a	1.12208	0.0285863
Sbno2	1.87948	0.000910103
Eef2	0.611492	0.0475458
Calm3	0.935779	0.0435633
A2m	3.07751	2.56e-06
Tle5	0.89348	0.0166755
Slmap	-0.585942	0.0424553
Acsl6	-0.936696	0.0352256
Gldc	-1.07395	0.000961717
E130307A14Rik	-0.596263	0.0474888
Arhgef9	-0.550211	0.00922694
S100a1	1.24516	0.00176309
Pygb	-1.09893	0.0493731
Hnrnpr	-0.657107	0.0127683
Eda	-1.04209	0.00498147
Pantr1	-1.03092	0.00331906
Matk	0.771753	0.00912084
Nova1	-0.641964	0.0411629
Dpf3	-0.789129	0.0135418
Upp2	-0.536855	0.0437874
Fam228b	-1.15306	0.034377
Igfbp2	1.66331	0.0356511
Tmsb10	1.60231	0.00373426
Tubb2b	1.4427	0.0159257
S100a6	2.43981	9.57e-06
Ifi27	1.43786	0.0260262
Lmtk3	0.685939	0.000836254
Atl2	-0.880027	0.037102
Gli2	-0.750448	0.00562357
Atp5e	1.44003	0.00025254
Fam20a	-0.82094	0.0426398
Caskin1	-0.905106	0.00928316
Megf10	-0.88003	0.0207611
Peg3	-0.538306	9.2e-09
Gramd1b	-0.78	0.00515318
Il18	-1.12635	0.0312427
Uri1	-0.69686	2.48e-09
Gm10076	1.32381	0.000444469
1810013L24Rik	-0.713214	0.0158112
S100a16	1.18058	0.0280681
Fbrsl1	-0.727055	0.0198751
Sclt1	-0.636207	0.0321568
Slc6a11	-0.96324	0.0439681
Acss2	-1.0611	0.00190373
Micu3	-0.668497	0.0285974
Tprkb	-1.34702	0.0222245
Usp54	-1.01947	0.00746439
Cap2	-0.622606	0.028704
Gm26512	-1.58483	0.00204291
Slc20a1	-0.706094	0.0159782
Kdm5b	-0.758979	0.0437874
Shisa9	-0.644601	7.42e-10
Lgi1	-0.753175	0.0268998
Map2k6	-1.05419	0.0204026
Adgrl1	-0.818665	0.0057143
Lama3	-1.23974	0.000731334
Gm20732	-0.924759	0.0142984
Armc8	-0.58243	0.0263996
Mir124-2hg	-1.02628	0.00271793
Map3k2	-0.665729	0.00273418
Ifitm3	4.80969	4.45e-07
Tspan9	-1.05835	0.00523992
Eno2	0.538901	0.037154
Psd2	-0.998452	0.00099151
Uqcr11	1.33439	0.00635073
Slc24a3	-0.610718	0.0153906
Rbm33	-0.607042	0.0427854
Gm40578	-1.12575	0.00498147
Pcnx	-0.528067	0.0376134
Emx2os	-1.08711	1.65e-05
Agfg1	-0.503009	0.029462
Elob	1.34821	0.0128553
Nectin3	-0.686902	0.0240372
Rmnd5a	-0.924285	0.00404802
Chchd10	1.11093	0.0224595
D130040H23Rik	-1.0519	0.0231458
Cc2d2a	-1.03396	0.0141223
Fbxl5	-0.637086	0.00607823
Mapre2	-0.994007	0.00706356
Epc2	-0.647042	0.0307094
Slc15a2	-1.11626	0.0237302
Tdrd3	-0.792308	0.00744303
Ngef	-0.826866	0.00265804
B930095G15Rik	-0.594668	0.00607823
Ranbp3l	-1.12435	0.00177717
Hlf	-0.822577	0.0198751
Celrr	-1.24641	0.000939481
Uqcrq	1.30692	0.00698751
Mrps6	1.69759	0.00204291
Ifit3	3.08192	0.00195532
Ncan	-0.89737	0.041018
Kif16b	-0.630304	0.0168882
Gm35552	-1.30055	0.0356511
Arrb1	-0.793941	0.00717863
Glrb	-0.761168	0.0352256
Col4a3bp	-0.690394	0.0132447
Purg	-0.746034	0.00521716
Chic2	-0.73189	0.0357152
Fggy	-0.768422	0.0232835
Glcci1	-0.71914	0.0124919
Arntl	-0.741368	0.0037192
Acvr2a	-0.540978	0.0255729
Rnf20	-0.575279	0.0309347
Pcsk6	-0.782964	0.0165849
Inpp4b	-0.757127	3.87e-06
Ddx3y	-1.01397	0.0357152
Atp5k	0.995781	0.0207518
Ddo	-1.08389	0.0138918
Id4	-1.31036	0.0424553
Ndufa13	1.16589	0.0391362
Trim30a	2.62044	0.000954647
Afap1l2	1.18167	0.0314287
Hdgfl3	-0.64026	0.0405437
Gm14964	-1.86696	0.012124
Nme2	1.57155	0.0039158
Foxn2	-0.896821	0.0422139
Gm12239	-1.15318	0.000149053
Ddx58	1.82815	0.0233094
Oasl2	3.54421	0.000189472
Aspg	2.22653	1.04e-07
Tbc1d12	-0.66965	0.0357152
1810037I17Rik	1.80469	0.00075002
Pfn1	1.29233	0.00958162
9430041J12Rik	-1.34838	0.000231413
Trp53bp2	-1.11101	0.0138854
Zfp451	-0.587106	0.0238858
Enpp2	-0.519357	0.0233486
Tuba1b	1.46296	0.000447357
Kcnk2	-1.19726	0.0137905
Gabrg1	-1.2668	0.0171869
Fbxl3	-0.815983	0.0012555
S100a13	1.03061	0.0130886
Apod	1.6068	0.0357152
Sema4d	-0.720054	0.0360329
Cep83	-0.587386	0.00155027
Gm26618	-1.07957	0.00616738
Ythdc2	-0.554285	0.00198001
Cebpd	2.70283	0.00817096
3110039M20Rik	-0.770055	0.000301996
Adra1a	-1.08882	0.00040666
Zfp438	-1.01135	0.0174494
Cd44	2.21971	0.000247385
Pdlim7	0.571543	0.00912084
Parp9	1.61737	0.0380242
Prodh	-1.08322	0.00709688
Smad4	-0.70678	0.0467116
Mfge8	-1.69339	0.00014903
Tbcel	-0.812965	0.0389837
Gm16759	-1.16154	0.0048035
Flna	1.464	0.0122669
Sept8	-0.5365	0.0413959
Sycp2	-1.69494	0.0285974
Fdft1	-0.808511	0.0282752
Slc5a3	1.56966	0.00475836
Gtf2a1	-0.650512	0.0415985
Fbxo3	-0.599397	0.0392509
Gm29514	-1.25534	0.00025254
Sp4	-0.625718	0.0201912
Tubb5	1.40773	0.0210199
Cacul1	-0.595097	0.0221692
Gigyf1	-0.534841	3.03e-06
Foxp2	-0.777471	9.16e-17
Gm4951	3.09395	0.0010474
Cntfr	-0.881443	0.00677582
Gm20646	-1.36496	0.00839074
Utp14b	-1.18774	0.000530174
Amy1	-0.998659	0.00134162
Pdzph1	-1.41496	8.59e-05
Cops9	1.2653	0.0104719
Nhs	1.24111	0.00234229
Mrfap1	1.07385	0.046285
Gng5	2.02633	0.000412373
Ube2q2	-0.584847	0.0446787
Myrip	-0.642215	0.000375828
Coro2b	-0.71977	0.000731334
Agap2	0.563828	0.0207518
B2m	1.94454	0.0245942
Sgk3	-0.544389	0.00607823
Ric1	-0.694724	0.0202068
Bst2	4.68839	7.65e-05
Ccnd1	1.81148	0.00706356
Snx12	-0.795787	0.0133836
Ndufc1	1.1933	0.023581
Zfhx4	-0.57542	0.00281821
Grin3a	-1.30356	0.000117
Gm10125	-1.18625	0.000691098
Ide	-0.584673	0.0415985
Fbxo8	-0.561078	0.0032644
Podxl2	0.571263	0.02444
Lypla2	1.19667	0.0418878
Cryab	1.42367	0.0130625
Uqcrb	1.14193	0.0497018
Tcirg1	1.14803	0.0438239
Pou3f2	-1.05679	0.0356511
Zc3h6	-0.518097	0.0263996
1110008P14Rik	1.01687	0.0233486
Trim30d	2.06225	0.0179083
9530026P05Rik	-1.13505	0.00265804
Abca5	-0.774219	0.00172771
Zfp800	-0.736659	0.037056
Mtx2	-0.546445	0.0493731
Maml3	-0.569892	0.0352256
Spock3	-0.639134	0.0422597
Uba52	1.55084	0.00701834
Mif	1.31032	0.0397118
Cp	3.7448	7.84e-08
Osmr	1.95435	0.00201615
Jmy	-0.902532	0.000573546
Sema4a	-0.744238	0.0481044
Gbp7	1.67039	0.0395699
Mro	-1.24754	0.00367555
Dio2	-0.788575	0.0142984
Gm37494	-0.994004	0.0207611
Mblac2	-0.762942	0.0207921
Man2a1	-0.558423	0.0033448
Gramd4	-0.783331	0.0179324
Tspan14	-0.725489	0.0016019
Cyp2j6	-1.18296	0.0110258
Tomm6	1.10316	0.00885581
Slc6a6	-0.579519	0.00263556
Mipol1	-0.87591	0.0210283
Hs3st3a1	-0.861553	0.0429966
Cchcr1	1.6321	0.000772267
Irgm1	2.62274	0.000253483
Rhoj	1.59957	0.00584758
D3Ertd751e	-1.04261	0.0455702
Pank1	-0.770555	0.00655528
2610316D01Rik	-0.868511	0.0157084
Tox2	-0.804325	0.0198751
Fam184b	-1.41252	2.38e-05
Adamts9	-1.33911	0.000939481
Insig1	-0.917036	0.00887166
Tet1	-0.91649	0.0272561
Trim34a	1.79294	0.0280874
Sned1	-1.53664	9.27e-08
Gbp3	2.31019	0.00592977
Uqcc2	1.08934	0.0235703
Tubb4b	1.59758	0.0187821
Gm20559	2.72636	0.00415098
Ddn	1.1265	0.0217679
C030005K06Rik	-1.56603	0.0239814
Mir670hg	-1.35641	9.08e-05
Lhx2	-0.887683	0.034194
Pdzd8	-0.6258	0.0198751
Cyp2j9	-0.996593	0.0485503
Epm2a	-0.916911	0.00736696
Zfp318	-0.652798	0.0414555
Lrch2	-0.657587	0.00562357
Col11a2	-1.51532	5.98e-07
Kazn	1.18709	0.0413152
Hlcs	-0.903125	0.0427854
Nat8f3	-1.72972	0.00150389
Gm26691	-0.897822	0.000731334
Gopc	-0.752351	0.0260715
Timm8b	1.2323	0.0438248
Gm26843	-1.82726	5.25e-07
Nr2e1	-1.12965	0.0437874
Ifit1	3.86912	6.82e-05
Nlrc5	2.88825	0.000136537
C130073E24Rik	-1.33329	5.07e-16
Ifitm10	2.39813	0.000193612
Gm46218	-0.956321	0.0177453
Tmem170b	-0.771672	0.044686
Hes5	-1.88378	0.00242782
Ttc39c	-0.953224	6.26e-05
Nkx2-2os	-1.14704	0.000731334
Btbd3	-0.608208	0.0416494
Adcy8	-0.572309	0.0132309
Gm20342	-0.645453	0.0424553
Slc8b1	-0.817165	0.0229512
Fam228a	-0.943948	0.0114293
Itga1	1.53586	0.0309843
Pde3a	1.99862	0.0012408
Msn	1.4191	0.0400096
Fam163a	-0.538734	0.0224463
Chst10	-0.957479	0.0137226
Adam12	2.99928	9.6e-06
D1Ertd622e	-0.525221	0.0165849
Tspan17	0.801456	0.0415985
Rsad2	3.22211	0.00140151
Csdc2	-0.793553	0.0207518
Naa30	-0.732085	0.00140071
Amer2	-1.05554	0.00278994
Ifit3b	3.50026	0.00196485
Gm45847	-1.38572	9.45e-05
Mios	-0.664875	0.0424553
Lair1	-1.08856	1.53e-05
S100a10	1.94395	0.00196485
Kcna2	-0.912497	0.0201902
Kif21b	-0.661077	0.00955286
Jakmip1	-1.09966	1.5e-07
Fam234b	-0.943936	0.0352256
Plxnc1	-0.602391	0.0358472
Gbp6	2.43119	0.0109153
Lpin1	-0.847108	0.0348595
C030018K13Rik	-1.71864	0.0198751
Parp14	2.2407	0.0135358
Slc35f3	-0.768017	1.08e-11
Rassf2	-0.712858	0.0280681
Romo1	1.31591	0.0252964
Rasl10b	0.802301	0.0233486
Lrp12	-0.672497	0.0318551
Ndufa1	1.6827	0.00799036
Gm10561	-1.34243	0.0454735
A330093E20Rik	-1.7594	0.00074424
1190005I06Rik	-1.30956	0.0012408
Hrh1	-0.949428	0.00444213
Trmt9b	-1.32994	1.07e-05
Syt17	-0.804606	0.0493066
Mtx3	-0.985664	0.0128553
4933431E20Rik	-1.16547	0.0143906
Wscd1	-1.08168	0.00130716
Emx2	-1.24789	0.0464848
Iigp1	4.65837	0.000731334
Nlgn3	-0.855955	0.0475458
Hectd2os	-1.57826	0.0049464
Mettl25	-1.0208	0.0198507
Gm13872	-1.87146	0.039396
Zbtb4	-0.721362	0.0473759
Xaf1	2.32927	0.00738988
Mapk11	0.569643	0.0390637
Ice2	-0.692591	0.0467273
Cep97	-0.804545	0.0457294
B3galnt2	-0.778387	0.0430935
Epb41l4b	-0.559217	0.0104719
Cxxc4	-0.503135	0.043434
Cacnb3	0.685194	0.039396
Cald1	1.46045	0.0450282
Pcdh19	-0.632489	0.0276497
BC006965	-0.904838	0.0263996
Macrod1	-1.4425	0.0237302
Fig4	-0.814824	0.00859249
Padi2	-1.7558	0.000662778
Map3k13	-0.92029	0.000754064
Igsf21	-0.764722	0.000138279
Ak4	-0.870542	0.0140337
Crbn	-0.700157	0.0180542
Mettl24	-1.1406	4.63e-05
Tab3	-0.735787	0.00138759
Zfp467	-1.11856	0.00523992
C030037D09Rik	-1.0519	0.000447357
D030055H07Rik	-3.21875	8.65e-07
Col27a1	-0.922238	0.0117785
Gm45708	-2.01374	8.73e-15
Gas2	-0.58311	0.00201615
Gcnt4	-0.758643	0.00797371
Irf7	3.82911	1.07e-05
Gm33680	-1.0424	0.00662501
Gm2115	-0.953873	0.021251
Tob2	-0.89118	0.0424553
Samd9l	2.29503	0.018522
Nox4	3.36811	0.000204786
Gm47644	-0.914954	2.02e-06
Pik3cd	0.720276	0.0250886
Plscr2	3.04458	0.000400608
S1pr3	1.84119	0.0277478
Celsr1	-1.4483	0.00220002
Dpysl3	1.12483	0.0496366
Glipr2	1.38003	0.0276497
Snrpd2	1.51292	0.00886332
Robo3	1.44534	8.86e-06
Nox1	-1.17259	0.00205715
Zfp788	-0.641272	0.0427854
4932438H23Rik	-1.19911	0.0104719
Entpd1	-0.826282	0.0260715
Elmod3	-1.03214	0.0233486
Hacl1	-1.16008	0.0221692
Cdon	-0.72507	0.0356511
Heca	-0.701059	0.0142984
Sept6	-0.762622	0.0131051
Vamp1	-1.03469	0.01105
Jdp2	-0.656915	0.0398768
Vldlr	-0.863576	0.0150466
Olig1	1.64665	0.030745
Ifi27l2a	4.77277	5.29e-05
Gucy1a1	-0.593019	0.000129727
Col4a6	1.65231	0.0291601
Serpina3n	3.32994	0.000731334
Arrb2	0.503534	0.025564
Ost4	1.51454	0.0475458
Usp18	3.83582	0.000467969
Odc1	1.60384	0.0474888
Psmb5	1.31875	0.0309347
Pde8a	-1.14316	0.00527247
Bcl7a	-0.804246	0.0424553
Eci1	-1.19577	0.0356511
Tcte2	-0.787276	0.00746439
Gm30524	2.13067	0.00140896
Il1r1	2.13777	0.0015061
Lyrm4	-1.0648	0.0222426
Gm1604a	-1.27697	1.23e-05
Lmo3	-0.600721	0.0198751
Zmiz1os1	-0.655578	0.0290373
Hrh3	0.784816	4.95e-05
Camk2n2	1.09846	0.00738889
Katnal1	-0.527012	0.0235703
Gm20642	-0.713988	0.0142235
Ccn1	2.84492	0.00616518
Gm266	-1.39561	0.0253863
Tspo	2.34473	0.00930705
Gpx1	3.18965	5.03e-05
Lonrf2	-0.602449	0.00243191
Pgr	-0.500997	0.0356611
Serac1	-0.669966	0.0437874
Ppdpf	1.38976	0.0260262
Atp10a	1.51046	0.0341215
Gm29260	-1.74408	0.0314287
Tmem151b	0.655853	0.00731771
Akap12	2.40746	0.000992778
C1qb	1.98531	0.0430354
S100a11	3.91032	0.000247385
St18	-0.779093	0.010987
Myoc	-2.13833	0.011984
Naf1	-0.63285	0.0239814
Stac2	0.908031	0.0016296
Tmem51	-0.818267	0.0452422
Ifi35	2.85266	0.00203559
Gbp5	3.26748	0.00607823
Tceal3	0.880628	0.0457294
Irgm2	2.48517	0.0356383
Ypel4	0.568696	0.0172807
H2-Q4	2.55954	0.0204938
Serping1	2.68512	0.0198751
Gm29642	-1.11047	0.0245885
Fas	2.16767	0.00340306
Parp10	3.12233	0.00025254
Hist1h2be	-1.42851	0.00113641
Paqr6	-1.16447	0.00107574
Gm36037	-1.23115	0.0174121
Gm41836	-1.656	3.47e-07
Anxa3	2.29332	0.0110526
Lgals3bp	1.94708	0.0131345
Psmb8	2.79445	0.00302918
Lss	-0.940903	0.0104719
2310022B05Rik	-1.15659	0.0120632
Map3k19	-1.25838	0.0411629
Gm30606	-1.59476	1.1e-09
Sox13	-1.04406	0.0174121
Nat8f6	-1.29853	0.000336671
Aebp1	1.28082	0.0481285
Socs3	2.95903	0.00444213
Dipk1c	-1.11671	0.0311507
D630003M21Rik	-1.06438	0.0168588
Gm10649	-0.859242	0.00823098
Rad51d	-0.783289	0.0424553
Slc8a3	-0.596028	0.000744784
Flrt1	-1.53509	6.99e-05
Acvr1c	-0.661275	0.0414021
Kcnmb2	-0.510654	0.0232404
Dyrk2	-0.878706	4.35e-07
F830016B08Rik	3.76564	0.00150296
4930432B10Rik	-0.933155	0.0239452
Gm20045	-0.751338	0.0398911
Mvd	-1.0193	0.00404802
Gm14634	-0.8884	0.0485279
Dhrs3	-1.08746	0.0315852
Ebf4	-0.794645	0.011909
Tmprss7	-1.29039	0.000889449
Mroh7	-0.887582	0.00566667
Rpe65	-1.92414	0.000754064
Gm42047	2.45328	0.0315852
Arhgap22	1.49262	0.00140071
Oas1a	4.63174	0.00150389
Rtn2	0.763977	0.0131302
Mdga1	-1.30723	0.00186434
Hnmt	-0.783173	0.0438239
Top2a	3.89698	0.0311507
Rhoc	1.64075	0.0275431
Cfap300	-0.800765	0.0475458
Pax6os1	-0.916346	0.0239814
Jag1	-1.09439	0.00281821
Ctdp1	-0.675026	0.0329452
Gm12224	-2.21853	0.0424553
9330179D12Rik	-1.17706	0.00204044
Tap1	1.98001	0.049312
Adamts16	-1.18245	0.00955659
Gm27239	-1.57555	0.0435236
Vegfd	-1.04022	0.00415098
Ly86	1.44946	0.0203105
Slc26a8	-0.838651	0.0167102
F630040K05Rik	-1.21158	0.0352256
Gm43597	-0.535501	0.0305631
Cox7b2	-0.86631	0.0104421
Hhatl	-1.20066	0.0260262
Gm4631	-0.673645	0.0363111
Nphs1	-1.398	0.0276213
Garem2	-1.13702	0.0237995
Oas2	5.23246	0.00142518
Plppr1	-0.821552	0.00359902
Pdlim2	1.38749	0.010965
Gm43154	2.20417	0.00746349
Rbm12b1	-0.804787	0.00623505
Adamts1	1.71075	0.0457294
Ppargc1b	-0.606019	0.0033448
Acaa2	-1.12405	0.0233486
Zkscan16	-0.804593	0.000124917
Gm48770	-1.77725	0.00264096
Gm46123	-1.30986	7.48e-07
Gpr176	-0.617808	0.00425091
Vmn2r29	-0.668731	0.0227599
Pcdhb14	-0.798076	0.0468174
Gask1a	-1.35535	0.000304061
Vmn2r57	-1.21966	0.017657
Tspan18	-1.68101	0.0037192
4932441J04Rik	-1.172	0.00957934
Acvr2b	-1.08317	0.00909927
Bcl3	2.9331	0.00263202
Tagln	2.98533	0.00562357
B230216N24Rik	-0.906025	0.00040666
Rims3	-0.619202	0.0169465
Gm45323	-1.43375	9.16e-17
Asb5	-1.23994	0.00698751
Atp23	-1.03195	0.0186197
Naa38	2.03529	0.00570715
Ube2ql1	-0.722374	0.0276057
Spdya	-0.994039	0.03873
Morrbid	4.42699	2.23e-05
Gm19967	-1.07894	0.000731334
Dlx6os1	-0.688279	0.0245942
Adck2	-0.871317	0.0420007
Alpl	-1.47478	0.000229613
Fn3k	-0.716626	0.0306947
Gm42869	-0.574943	0.0296237
Fam217b	-0.904741	0.000136537
Cacng5	2.06345	0.0315493
Tm4sf1	3.2664	0.0130336
Il3ra	1.73585	0.00616738
Cyp2j8	-1.59989	0.0239814
Kcnv1	-0.795539	0.0252964
9630001P10Rik	-1.50141	0.0390255
Neu2	-0.899457	0.000266685
Cstb	2.3525	0.0425825
Hmox1	2.93126	0.00233848
Txlnb	-1.43462	0.0207921
Gpr21	-0.575588	0.0198751
Vit	-1.95466	0.0135358
Car7	-0.585039	0.0451041
Gm1604b	-1.76377	7.81e-06
Zfp239	-0.936997	0.0414021
Slc46a3	-1.33284	0.0210389
Mef2b	-1.10758	0.0201507
Hsd17b10	1.8194	0.0117132
Gm31592	-1.50541	0.00201615
Shisal1	-0.933238	0.000647623
Kirrel2	-1.27385	0.0349796
Pcdhb19	-0.94974	0.000530174
Gm17660	-1.43232	0.0473759
Gltp	1.16964	0.00466191
Myo3b	-1.57703	0.00928316
Phf2os1	-1.23749	0.0153906
Gm28403	-0.829171	0.023581
Rab3b	-1.07069	0.00404802
4930419G24Rik	-1.63477	0.00243928
Gm17066	-1.10931	0.00374612
Pcdhb16	-0.811724	0.0207516
Gli1	-1.55359	0.00798432
Gm13387	-1.26681	0.0174121
Acsm5	-2.09516	0.00888168
C030047K22Rik	-0.752365	0.0467273
Clec2d	2.68591	0.0173838
Icmt	-1.00671	0.0154948
Lrig3	-1.2647	0.0321568
Slfn8	3.73825	0.00238967
A330033J07Rik	-1.66213	4.05e-05
Ces5a	-1.49086	0.0242959
Gm14393	-0.585683	0.0430346
Ankrd35	-0.654388	0.0252823
Gm42701	-1.12481	0.0252964
Gbp2	3.92572	0.00915592
Pxylp1	-0.889876	0.0108126
Sypl2	-1.62775	0.029462
Phf11d	4.78313	0.00717863
Uba7	2.37254	0.00749931
Tgm1	3.8364	0.000554227
Slco1a5	2.93402	0.0140337
Gm30655	-1.21487	0.00317792
Dnajc12	-1.23019	0.0185602
Olfml2a	-1.55161	0.0198751
Casp8	1.7926	0.0121361
Gm50431	-0.935913	0.0356451
Slc43a3	3.31983	0.00752959
Gm45341	-1.53971	6.06e-06
Hhip	-1.27658	0.00281821
Tpx2	3.20752	0.00344876
Lgals9	4.22448	0.0135418
Eno3	-0.820503	0.0025859
Selenoh	2.18912	0.0465251
Ighm	1.16258	0.00798432
Gm26935	-1.09	0.00621798
Clcn1	-0.726523	0.0263996
Bbox1	-2.15567	0.00223998
1700047M11Rik	-0.860939	0.0415985
Gm39526	-1.01038	0.00690342
Gm28050	-0.951005	0.0498183
Gm42699	-0.687123	0.0432584
Efhc2	-1.13828	0.0033448
Gm45338	-1.78276	0.0466991
Sp100	2.36114	0.00703814
1700027A15Rik	-1.38046	0.00211621
Ccr5	2.52819	0.000836254
Gldn	1.86103	0.00738988
Limd2	1.1195	0.0217679
Gm11808	2.04336	0.034194
Brip1	2.55072	0.0451041
BC016579	-1.18379	0.0424553
Pou5f2	-0.942517	0.00265804
Gucy2e	-2.25535	0.000731334
Phex	-0.851187	0.0275431
Ppef2	-1.23287	0.0137076
E330013P04Rik	-1.41767	0.0356511
Gm2000	2.12017	0.00832977
Zfp984	-1.08616	0.0454509
Gm14391	-1.12114	0.0255729
Ifi204	4.69976	0.00397754
Syne3	2.31862	0.0181662
4933427I22Rik	-1.42159	0.00912084
Aif1	1.57869	0.0238858
Hr	-1.17816	0.0437874
Pcdhb21	-1.07006	0.00410318
Il6ra	1.92456	0.0208277
Gm49518	1.4553	0.00607823
Igfbp3	2.75209	0.0358472
Slfn9	2.79021	0.0176987
Gm41496	2.60087	0.0275431
Flnc	2.68438	0.00698751
Ckap2	4.56959	0.016129
Lif	2.10263	0.00281821
Zfp57	0.944345	0.0427854
D630024D03Rik	-1.42396	0.0106288
Fosl2	1.13377	0.0154971
Gm38593	-2.3525	0.00340306
Setmar	-1.03494	0.0103118
Gm14061	-0.947522	0.0424553
Csf3r	1.41134	0.00156754
Gm29666	-1.08848	0.0475458
Stab1	0.999034	0.0198751
Efna2	-1.604	0.0284557
Gm12089	-1.68995	0.0357152
Shisa2	-2.00959	0.0111064
Lrrc69	-1.28125	0.0447961
Adgrf2	-1.25023	0.0014088
Pcdhb20	-1.12464	0.03753
Gucy2f	-2.05835	0.00513284
C030029H02Rik	-1.53511	0.0345086
Gm44763	-1.55632	0.0257887
Gm17203	-1.48546	0.0237107
4931423N10Rik	-1.26387	0.0103118
Colq	-2.0131	0.000731334
Esrrb	-1.10393	0.0424553
Pwwp3b	-1.63729	0.0174494
Gm29367	-2.51643	0.0455702
Tfap4	-1.51315	0.0161924
Pcdhb11	-0.791979	0.0391816
Gm49519	-1.04104	0.0290373
Gm43666	-1.97076	0.00406092
Gm45321	-2.23964	0.0357152
Lrrc4c	-0.499335	0.00738988
Kalrn	-0.499152	0.00012855
Macrod2	-0.497571	0.00218903
Chrna7	-0.495869	0.00182506
Arhgap32	-0.494552	0.00752959
Sox12	-0.494177	0.0107034
Mapk8	-0.491321	0.00341554
Gfod1	-0.491139	0.000558051
Satb1	-0.48919	0.000903409
Gls	-0.488838	0.0154971
Fgf14	-0.488227	0.0201951
Cav1	1.96141	0.0405437
Adgrl3	-0.487084	0.0485503
Cop1	-0.485928	0.0493123
Herc1	-0.48375	0.0103118
Hace1	-0.478014	0.0207611
Kcnma1	-0.477201	4.55e-09
Efna5	-0.470344	0.00885581
Cdkn1a	2.16598	0.0440818
Gadd45a	1.83097	0.0446787
Sgo2a	2.39343	0.0180542
Map7d2	-0.469419	0.0048035
Hspb6	1.98367	0.00485621
Tmem178b	-0.466292	0.00114262
Egfem1	-0.466277	0.00912084
Gm1043	-0.464474	0.0121189
Lnpk	-0.464167	0.0394301
Stk39	-0.46069	4.78e-14
Pclo	-0.460356	0.000117
Btbd10	-0.457114	0.046285
Timp1	3.75159	0.0426535
Gbp8	3.30516	0.0388455
Dhx58	2.69244	0.0222755
Nlgn1	-0.455017	0.018869
Thrb	-0.45421	0.0448311
Prickle1	-0.451888	0.0356383
Uhrf1	2.86087	0.0424242
Icam1	2.28617	0.0479865
Dock3	-0.451037	0.00616738
Gprasp1	-0.44871	0.0236425
Gm1976	-0.448619	0.0423598
Cntn1	-0.447168	0.0186665
Styk1	2.24175	0.0451424
Nacad	1.20681	0.0272141
Nuak2	3.31347	0.033267
Nes	4.21092	0.0104719
Ppp1r16b	-0.446087	0.0193296
Reln	-0.444588	0.00506243
Ptk2	-0.444333	0.0215672
Myo9a	-0.442236	0.0192166
Fam169a	-0.440181	0.00706356
Rpia	-0.438777	0.0451424
BC030867	2.53654	0.0480671
Gm10115	-0.438037	0.0173339
Osbpl8	-0.435688	0.0182075
Epha5	-0.434535	0.025634
Mtcl1	-0.431213	0.000122385
Gm16310	1.75003	0.0254146
Rabgap1l	-0.42818	0.0158393
Exoc6	-0.424303	0.0253802
Mfsd6	-0.422575	0.0206072
Ddx10	-0.417032	0.0173339
Vopp1	-0.413395	0.0498183
Elavl4	-0.413124	0.00431575
Mpped1	-0.410559	0.00230061
Gbp9	3.39271	0.0355381
Gabrg3	-0.407728	0.00746439
Map7	-0.402979	0.00616738
Gm43462	-0.40147	0.034194
Casp4	2.69265	0.0475458
Adam22	-0.40095	8.58e-05
Tubb6	3.46712	0.0475458
Sema3e	-0.397838	0.00717863
Mlkl	3.96032	0.0414021
Esyt2	-0.39716	0.00629417
Faxc	-0.388136	0.0130336
Brdt	-0.385565	0.0256411
Far1	-0.383418	0.00672346
Nptn	-0.383031	0.0392164
Mndal	2.30583	0.00746349
Rtl4	-0.374673	0.0413959
Rims2	-0.368343	0.0182075
Gpr158	-0.362956	0.020693
Dmxl2	-0.361926	0.00172771
Tanc2	-0.359087	0.0233486
Phtf2	-0.352091	0.0291601
Tmem132b	-0.348799	0.0131646
Mgat4c	-0.343284	7.05e-07
Dtnb	-0.341525	0.0430935
Fbxw7	-0.339791	0.0493173
Psors1c2	2.72614	0.00588584
Mark1	-0.330127	0.046285
Kcnt1	0.469246	0.0295428
Trim8	-0.329908	0.000865655
Amph	-0.32731	0.0214635
Celf2	-0.318374	0.020607
Ncald	-0.316492	0.0198751
Ppfia3	0.457105	0.00562357
Ftx	-0.314573	0.00281821
Cstf2	-0.285234	0.0233486
Rhot2	0.453503	0.0373315
Dpy19l1	-0.283883	0.041018
Cntnap1	0.420929	0.0233486
Ttc39b	-0.261305	0.046285

## Sheet: vHPC_ExcitatoryNeuron_ATvAC
gene	logFC_groupAged_Tumor	FDR_groupAged_Tumor
Vxn	-0.264208	0.000536707
A830018L16Rik	-0.090563	0.00243721
Pkhd1	-0.513678	0.00582068
Npas2	-0.273932	0.0046763
Tmeff2	-0.394164	0.029117
Pgap1	-0.339205	2.71948e-08
Ankrd44	-0.469011	3.36276e-12
Hspd1	-0.18163	0.00835867
Ncl	-0.1589	9.86236e-05
Hes6	0.672069	0.00772119
Bcl2	-0.472729	0.0180287
Lgr6	0.579567	0.00582068
Kif21b	-0.502369	0.000937286
Lhx9	-0.198903	0.0428166
Fam163a	-0.948333	6.71765e-06
Ildr2	-0.252182	0.0202475
Mndal	-0.660375	3.97964e-10
Ifi203	-0.743296	1.81795e-05
Grem2	-0.361023	0.0325167
Chml	-0.612191	0.0164971
Pld5	-0.774279	0.00582068
Dnah14	-0.298151	0.0292868
Ptpn14	-0.613107	0.000535119
Cd34	-0.311422	0.0011878
Usp6nl	-0.351854	0.0146309
Gm10115	-0.40792	0.0034232
Surf2	0.237669	0.0229855
Gm13481	-0.369558	0.000337884
Lypd6b	-0.689842	0.0174935
Galnt5	-0.788716	0.0353223
Acvr1c	-0.171229	0.0270494
Scn2a	-0.199414	0.00416613
Gm28638	-0.440758	0.00582068
Myo3b	-0.360147	0.00016875
Itga6	-0.29446	5.33804e-10
6430710C18Rik	0.725391	0.0181724
2600014E21Rik	-0.327413	2.07006e-10
Ccdc141	-0.306342	0.0344636
Zfp804a	-0.485154	0.0085735
Mir670hg	-0.561955	7.52222e-34
Pamr1	-0.659205	0.0165258
Slc1a2	-0.349602	0.0364596
Cd44	-0.788435	0.0326718
Ccdc34	-0.112336	0.0123329
Grem1	-0.352067	0.0297825
A530058N18Rik	-0.250562	0.00582068
Spint1	0.631392	0.03539
Tgm3	-0.735644	0.0132754
Nanp	0.536566	0.00023577
Zfp965	-0.647918	0.0435096
Zbtb46	-0.458308	0.0101556
Naaladl2	-0.349328	0.00209494
Gm37573	-0.416032	0.0428166
Pld1	-0.455533	0.00595168
Lekr1	-0.21037	0.0235699
Gm20627	0.753876	0.0181724
Dpyd	-0.313255	1.14585e-05
Tmem56	-0.251622	0.0185918
Ttll7	-0.252501	0.03539
AI115009	-0.403364	0.00582068
Gm11867	-0.818353	0.0181724
Cnr1	-0.17113	0.0246466
Tgfbr1	0.432762	0.0115126
Nr4a3	-0.701579	0.015743
Lpar1	-0.528131	8.46462e-05
Frmd3	-0.447096	2.85598e-12
Agbl4	-0.180525	0.0127116
Bend5	-0.2585	0.0065854
Hpcal4	-0.142164	0.0022884
Maneal	0.208881	0.0057636
Col16a1	-0.409628	0.000912246
AB041806	0.710035	7.45415e-05
9330182L06Rik	-0.180495	0.00260822
Sema3d	-0.367747	0.00402729
Gsap	-0.543458	5.56556e-17
9530036O11Rik	-0.653356	0.0453951
Kcnk3	-0.211178	0.0319519
Cenpa	0.715501	0.0201589
Dpysl5	0.237849	8.46462e-05
Ppargc1a	-0.197677	0.0133281
4932441J04Rik	-0.294514	0.0006923
Pcdh7	-0.218303	0.0175177
Nwd2	-0.409617	0.0329557
Gm15477	-0.457691	0.03539
Lnx1	-0.20312	0.0101556
Kit	-0.273369	0.00598952
Rasgef1b	-0.579517	0.00543736
Gm42595	-0.212673	0.0428166
E130006D01Rik	-0.505368	0.00233524
Myo18b	-0.477805	0.00682246
Oas1c	0.793657	0.0102346
Gm15627	0.654136	1.25948e-05
B3glct	-0.410276	0.00501662
1700028E10Rik	-0.407288	1.11979e-07
Gm4876	-0.688758	0.00368964
Tspan12	-0.146011	0.0164971
Smo	0.367905	0.000415146
Tsga13	-0.551824	0.000705081
Adcyap1r1	0.248939	3.74564e-06
Fbln2	-0.505182	1.90838e-06
Gm19757	-0.81005	6.5887e-05
Gm34933	-0.33028	0.0085735
Slc6a11	-0.440255	0.000368712
A2m	0.891797	0.00119065
C1s1	-0.370593	0.00598952
Gm15862	0.38897	0.00248777
Nrip2	0.290157	2.71882e-08
Gm36640	-0.808225	3.59834e-05
Pde6h	-0.369675	0.0165258
Eps8	-0.514955	0.0393072
Pde3a	-0.525418	0.0255615
Sox5	-0.398725	0.0339961
Peg3	-0.238955	0.00443663
Irgq	-0.45929	0.004699
Selenov	-0.721811	0.0229525
Gabrb3	-0.315376	0.0441029
Atp10a	-0.486574	0.0107853
A230006K03Rik	-0.226795	0.00424763
Magel2	-1.01762	0.0233968
Gm44813	-1.07074	0.0112638
Agbl1	-0.261016	0.00023577
2610206C17Rik	-0.567436	0.0229525
Gm44947	-1.28654	0.0182796
Crym	-0.181154	0.0085735
Gm26974	-0.688674	0.0326718
Ctbp2	-0.157333	0.0211068
Fank1	-0.354664	0.0459966
Insyn2a	-0.583733	0.00424763
Tspan32os	-0.863123	0.0232434
Gm31135	-0.599233	0.0415215
Efnb2	-0.295474	9.50102e-07
Myo16	-0.289781	3.13399e-06
Unc5d	-0.732392	1.23803e-06
Nrg1	-0.516254	0.000158661
Fam149a	-0.747322	6.33568e-06
Gm39185	-0.307095	0.00348273
Hmox1	0.774615	0.0011878
Neto2	-0.166612	0.00029166
Hsf4	-0.241482	0.0368632
Gm5914	-0.318289	0.0235699
Thap11	0.518792	0.00832069
Vps4a	-0.198771	0.00832069
Mtss2	-0.245867	0.0490196
Cntnap4	-0.728873	4.80208e-10
Piezo1	-0.585422	0.0263271
Ccdc82	-0.178589	0.0333884
Sesn3	-0.245044	0.0343871
Kdm4d	-0.267899	0.00209494
Slc36a4	-0.167423	0.0204855
Dock6	-0.532162	0.0235699
Epor	0.561522	5.23881e-06
Gm47153	-0.685937	0.000705081
Gm31698	-0.496267	0.0246597
Megf11	-0.238946	0.0132309
Gnb5	-0.282466	0.00582068
Hmgcll1	-0.347201	0.00582068
Pcolce2	-0.280912	0.0131038
Amotl2	-0.71724	0.00632036
Col6a5	-0.783106	4.77111e-05
Arpp21	-0.367811	0.0004546
Gm4657	-0.765714	0.00622941
Gm39436	-1.11598	0.0112638
Gm36485	-1.20002	0.00178397
AU023762	-0.43655	0.000832857
Scn5a	-0.733117	0.0192528
Plekhg1	-0.66963	0.0292868
Esr1	-0.308033	0.000468597
Tnfaip3	-0.629499	0.00543736
Lama2	-0.355662	0.0150572
Gm47823	-0.706246	0.00632036
Ccdc162	-0.297071	0.0302074
Bves	-0.230362	1.23803e-06
Col13a1	-0.485359	0.0263271
Cabcoco1	-0.610045	0.000415146
Zwint	-0.21468	3.97964e-10
Col6a2	-0.885643	0.027647
Col6a1	-0.985052	0.0190598
Lrriq1	-0.19662	0.0235699
Lin7a	-0.382267	0.0409707
Pawr	-0.345144	0.0010219
Gm5136	-0.187915	0.0109485
Tph2	-0.760217	0.0124757
Lgr5	-0.649722	4.76663e-08
Rassf3	-0.752198	0.000908901
Vmn2r87	0.157266	0.00159198
Upp1	0.966721	0.00923545
Gm12068	-0.342278	0.00598952
Gpr75	-0.323616	0.0146413
Lcp2	-0.417879	0.00948107
Tenm2	-0.408873	0.0428166
Adam19	-0.373363	0.00348273
Col23a1	-0.320818	0.0178516
Gm12212	0.807402	0.0220644
Zkscan17	-0.386407	6.32841e-08
Gas7	-0.406988	0.0198577
Trp53i13	0.429927	0.020222
Gm12576	-0.319069	1.35865e-10
Ankfn1	-0.881536	1.31592e-08
Med24	-0.215414	0.0307445
Sdk2	-0.374308	0.0349634
4932435O22Rik	-0.70543	0.0384056
Wbp2	0.275477	0.0292868
Gm32828	-0.67173	1.9644e-05
Rhob	0.287156	0.000313116
Gm34237	-0.784414	0.0198858
Dgkb	-0.343533	0.00239176
Gm33680	-0.744235	0.00836619
9630002D21Rik	-0.400096	1.13492e-05
2310015A10Rik	-0.567472	0.000474239
Slc8a3	-0.455745	0.0471678
4930544I03Rik	-0.564397	0.0333063
4930408O17Rik	-0.401461	0.0107716
Actn2	-0.288661	0.0242711
Gng4	-0.68806	0.0325167
Gm47882	-0.681745	0.0103186
Sugct	-0.229645	0.0085735
Hist1h3d	0.950103	0.037595
G630018N14Rik	-0.827899	1.12712e-08
Nedd9	-0.236442	0.0198858
Gm29676	-0.8731	0.0165258
Shc3	-0.409921	0.0310957
A530065N20Rik	-0.592583	0.000664067
Pcsk1	-0.628737	5.70756e-08
Mctp1	-0.24511	0.0353223
2210408I21Rik	-0.255717	0.0225821
2810049E08Rik	-0.457022	0.0232409
Tmem171	1.04579	5.7654e-05
Gm29502	-0.296716	0.0459966
Adamts6	-0.237691	0.0433615
Htr1a	0.450422	0.0154394
Rab3c	-0.250427	1.00834e-32
Ccl28	-0.620416	2.6719e-18
Gm35823	-0.537522	0.0168965
Ldb3	-0.196673	0.000680837
Lrp10	0.319083	0.0423886
Gja3	-0.669278	0.000146733
Fbxo16	-0.259799	0.00598952
Egr3	-0.574494	0.0006923
Gm6999	-0.550498	0.0491451
Gm49046	-0.489446	0.00300413
Gm33203	-0.60158	0.0120658
Dab2	-0.870594	0.00116778
C030047K22Rik	-0.34707	0.0355341
9230109A22Rik	-0.505654	0.00527848
4930445E18Rik	-0.506855	0.000155624
Dnah5	-0.268645	5.17658e-05
Sdc2	-0.157363	7.01825e-05
Gm35248	-0.712619	0.0235407
Gm10373	-0.326525	0.00209494
Mtss1	-0.45597	0.000196214
Lrrc6	-0.492706	0.0410684
Acr	-0.381417	3.96691e-05
Ppl	-0.337359	0.0446744
Masp1	-0.281692	0.0263932
Atp13a4	-0.384318	0.0466035
Mylk	-0.491649	0.00430654
Gpr156	-0.59503	0.0187354
Ift57	-0.209613	0.045463
4930420G21Rik	-0.640277	0.00576872
Synj2	-0.392544	0.0191215
Airn	-0.191018	0.00576872
Rgmb	-0.146188	0.00554072
Cpne5	-0.585922	0.0235699
Zbtb22	0.604881	0.00543736
A730006G06Rik	-0.749227	0.0170903
Efhb	-0.303401	0.0343355
Trip10	-0.583654	0.0132817
L3mbtl4	-1.31424	0.00766105
Vit	-0.848635	0.00126912
Eif2ak2	-0.475619	1.53294e-07
Gm10125	-0.281143	0.0349634
Osbpl1a	-0.180246	0.0263932
Chst9	0.121517	0.0202475
A830052D11Rik	-0.534196	0.0229855
2310026I22Rik	-0.318611	6.94858e-05
Camk4	-0.488648	0.00582068
Egr1	-0.945824	0.000116638
Sema6a	-0.583206	5.55524e-15
Ppic	0.68966	1.12712e-08
Marchf3	-0.259538	0.0167255
Atp8b1	-0.791083	4.65857e-07
Lipg	-0.52531	0.000188182
Socs6	-0.28079	4.61105e-07
Syt12	-0.541942	0.00716985
Npas4	-0.984754	1.57342e-16
Gm4952	-0.602647	0.0233609
Cntf	-0.44565	0.0349634
Mamdc2	-0.565252	0.000612286
1700028P14Rik	-0.403853	0.0428166
Ak3	-0.254641	0.0133281
A830019P07Rik	-0.58128	0.0235699
Htr7	-0.846838	3.14128e-05
Kif11	0.499442	0.0401727
Plce1	-0.203517	7.19263e-05
Cc2d2b	-0.404198	0.000226172
Gucy2g	-0.636824	1.13492e-05
Clcn5	-0.16366	0.0271615
Tenm1	-0.185517	0.00128663
Hs6st2	-0.307381	1.44778e-05
Xlr3a	1.80837	0.0235699
Amer1	-0.243975	0.0415215
Ar	-0.207196	0.0140456
Slc16a2	-0.287464	0.0011878
Pbdc1	-0.181275	0.0253387
Dach2	-0.350897	0.00157663
Rnf128	-0.230077	0.000634499
Htr2c	-0.450891	4.65857e-07
Gm15246	-0.259198	0.0415215
Mid1	-0.955809	3.88712e-05
Gm47283	-0.919275	0.00830393

## Sheet: vHPC_InhibitoryNeuron_ATvAC
gene	logFC_groupAged_Tumor	FDR_groupAged_Tumor
Zdbf2	-0.437794	0.0153553
Spag16	-1.68375	0.00106774
Usp37	-0.209863	0.00774826
Mfsd4a	-0.38555	0.000191241
Pogk	-0.521383	0.00192448
Mndal	-1.50448	0.0480085
Tgfb2	-0.623033	0.0459679
Prkcq	-1.07202	0.00774826
BC005624	0.413437	0.00174553
Grb14	-0.661477	4.17098e-08
Myo3b	-0.950891	0.0200925
Dnajc10	-0.281387	0.00395228
Snx21	0.297337	0.0397734
Trp53rkb	0.58965	0.00523929
Cebpb	0.81704	0.0192464
Qrfpr	-0.960635	0.00318806
Gm29865	-1.44058	0.00295101
Gm11867	-1.20044	0.0459679
Zbtb17	-0.490494	0.014082
Abcb1b	-0.499481	0.00551345
2700038G22Rik	1.07654	0.00551345
Rnf32	-0.447191	0.0337262
Nop14	-0.59958	0.0339174
Qdpr	-0.572761	0.000361097
Dhx37	-0.935328	0.0428118
Hip1	-0.829946	0.0192464
Gm42456	-1.16003	0.0118958
Gm45051	1.00073	0.00192448
Tex261	0.556078	0.00357541
Bms1	-0.327006	0.0177708
Gm36371	0.838662	0.00357541
Clcn4	-0.267174	0.0337262
A930016O22Rik	0.687258	0.0176556
1110035H17Rik	1.02621	0.0168202
Bax	0.390338	0.000617046
Oca2	-1.09382	0.0197656
Zfp710	-0.450079	0.00399233
Rab38	-1.02735	4.73793e-06
Zfp553	0.527162	0.0153553
Lhpp	-0.949723	0.00164932
Bet1l	0.533135	0.00376162
Tssc4	0.544635	0.0399076
Sfrp1	-1.16275	0.0493575
Frg1	-0.238732	0.0399076
Glra3	0.84163	0.0121402
Rab8a	-0.708118	0.0280413
Larp6	-0.662424	0.0493575
Bmp5	-1.17167	0.00774826
Hcrtr2	-0.664603	0.000126312
Mlip	-0.830088	0.000835569
Gm17477	0.670994	0.0444474
Rnf7	0.48266	0.00624802
Ephb1	-0.880075	0.0372261
Col6a5	-1.61541	0.00399233
5830454E08Rik	0.886478	0.0448727
Vip	1.74726	0.0472981
Mrpl54	0.659469	0.00821982
Mybpc1	1.10649	0.00757846
Hnrnpab	-0.549639	0.0337262
Hist3h2a	0.728319	0.000230372
Slc16a11	0.559279	0.0371332
Gfap	0.896705	0.00384635
Mrc2	-0.782779	0.0401975
Snhg16	0.64613	0.00351549
Frmd6	-0.486446	0.0493575
Akap5	-0.543866	0.00357541
Macc1	-1.85328	0.0453901
Sptlc1	-0.308992	0.0453901
Hapln1	-0.631691	0.00886681
Srek1ip1	-0.496322	9.66721e-06
Ccl28	-0.953509	0.0197656
Zmiz1os1	-0.795494	0.00088121
Dph3	0.48359	0.00357541
Styx	-0.346824	0.00599885
Gmpr2	0.433968	0.0168051
Gm49685	-0.84767	0.00384635
Trhr	-1.1184	0.0480085
Baiap2l2	-1.17631	0.00164932
Efcab6	-0.564479	0.0280413
Pim3	0.821532	0.0192464
Cpne8	-0.649171	0.0399076
Naa60	-0.603149	0.00357541
Spag6l	-0.634224	0.00088121
Abcf3	-0.493446	0.00357541
Paxbp1	-0.339056	0.018197
B230307C23Rik	-0.292558	0.000184507
Tagap1	-0.671249	0.0209711
Zfp414	0.492096	0.00970339
1110038B12Rik	0.620152	0.00774826
Trmt61b	-0.304507	0.00732143
Gm31645	0.656092	0.0134
Prkd3	-0.563287	0.0407362
Npc1	-0.308817	0.00182405
Chst9	-0.911958	0.0290809
Tpgs2	-0.46415	0.0176556
Pcdhb16	-0.548162	0.00380938
Npas4	-1.35498	0.03548
Htr7	-0.950362	0.0168051
Mrpl43	0.509823	0.00398559
Rtl8a	0.671433	0.0285068
Nox1	-0.558498	3.29153e-05
BC065397	0.490265	0.000830962
Mid1	-0.939713	0.0121402
Gm47283	-0.883259	0.000361097

## Sheet: vHPC_Astrocyte_ATvAC
gene	logFC_groupAged_Tumor	FDR_groupAged_Tumor
Spag16	-0.447416	0.015231
Stk16	0.433961	0.00409515
Cdh19	0.336248	0.00294125
Tfcp2l1	0.539518	0.0100196
Gm7694	-0.93888	0.0250322
Aim2	-1.59551	0.0444335
Gm37885	0.41423	0.0191991
Abca2	0.256325	0.0296251
Ralgds	0.357223	0.0123466
Phyhd1	1.02674	0.00801116
Prrx2	1.01695	0.0047432
Ggta1	0.533814	0.025717
Ptgs1	0.723335	0.025717
Zbtb6	0.530444	0.0444335
Slc1a2	0.145058	0.000128898
1810024B03Rik	0.414053	0.027482
E2f1	1.29761	0.0139863
Sdc4	0.827311	0.0335293
Dbndd2	0.471951	0.0410316
Kcnb1	-0.570745	0.0218814
Cebpb	1.2428	1.6854e-06
Wdr49	-1.24891	0.015855
Gucy1b1	-0.313767	0.0386898
Tmem79	0.753741	0.0342821
Hist2h2be	0.645079	0.00914772
Hist2h3c1	0.877435	0.042677
Plppr5	-1.18588	0.0372419
A730020M07Rik	1.61986	0.000799862
Etnppl	1.05943	0.00701918
St6galnac5	-0.456078	0.0340275
Grin3a	-0.408052	3.00038e-05
Ift74	-0.226856	0.018444
Lrp8	0.404144	0.0122711
Lsm10	1.08788	0.000391441
Reln	-0.720518	0.0154422
Tmem129	0.894646	0.0444335
Nsd2	-0.296388	0.000525014
Atp8a1	-0.272119	0.000391441
Lnx1	-0.416202	0.00701918
Vamp9	-0.623682	0.0332303
Tmem150c	-0.599	0.000854165
Atp6v0a2	0.275209	0.0289003
Sumf2	0.365245	0.0155912
Dnajc30	0.6359	0.0123466
Ttyh3	0.331382	0.0394993
Rasl11a	0.894465	0.0437064
Dync1i1	-1.64142	0.025717
Rbm28	0.406201	0.0396165
1810058I24Rik	0.395331	0.0432479
Eva1a	0.316615	0.00914772
Nat8f4	0.498439	0.025717
Klf15	0.502979	0.025717
Adamts9	-0.445514	0.025717
Rpusd3	0.712765	0.025717
Zfp637	0.477552	0.0462565
Gpr162	0.437103	0.0202024
Dact3	0.477455	0.0335293
Hif3a	0.945208	0.025903
Zfp36	1.30707	0.0190524
Kirrel2	0.54634	0.025903
Lgi4	0.302669	0.00145352
Ptpn5	-0.500599	0.027482
Chrna7	-1.40988	0.00914772
Tarsl2	-0.424912	0.0267756
Aen	0.80719	0.025717
Pex11a	0.541037	0.025717
Idh2	0.368213	0.0485486
Tlnrd1	0.910757	0.0289003
Ctsc	0.849394	0.00942536
Sytl2	-0.987784	0.00919095
Lamtor1	0.423472	0.00404525
Nrip3	-0.576103	0.00816976
Spns1	0.421662	0.00409515
Sult1a1	1.1122	0.00145603
Zfp688	0.811425	0.0291214
Tssc4	0.505963	0.000221495
Ing1	0.633721	0.00914772
Gas6	0.545735	0.0279594
Zfp703	0.779877	0.0100196
Gm1698	0.831847	2.7205e-06
Gsr	0.287181	0.00942536
Mtmr7	-0.645785	0.00550724
Ddx39	0.593448	0.0408668
Trir	0.383752	0.0335185
Gm19935	0.79671	0.0100196
Nlrc5	0.758499	0.0171616
Cmtm3	0.720122	0.0047432
Fat3	-0.558503	0.0147362
Ccdc159	0.652733	0.0462565
H2afx	0.78632	0.0374197
Chst2	0.699301	4.59974e-06
Ccdc51	0.569726	0.0190524
Ppp1r14c	-0.633792	3.37895e-05
Ncoa7	-0.245867	0.0202024
Slc25a16	0.381932	0.0250322
Rnf126	0.728389	0.0147362
Sbno2	0.607647	0.0250748
Btg1	0.671996	0.00459654
Dusp6	0.701155	0.0047432
Mettl1	0.577565	0.00816976
Rnf215	0.633569	0.041443
Cobl	-1.00405	0.025717
Irgm1	0.902275	0.00107639
P4ha2	0.543081	3.00038e-05
Cops3	0.263646	0.0127369
Rap1gap2	-0.521092	0.0270507
Mir22hg	0.432582	0.0136058
Aldoc	0.781406	0.00550724
Gfap	0.947257	0.00914772
Rgs9	-0.714903	0.00914772
Jmjd6	0.45753	0.0190524
Lgals3bp	1.22704	0.0449736
Rfng	0.420968	0.0462565
Rhob	0.534773	0.0139863
Gm33680	-0.568745	0.025717
Irf2bpl	0.830715	0.0396165
Ifi27	0.788592	5.15021e-14
Bag5	0.68472	0.0114217
Gm48530	-0.59311	0.0449736
Dcdc2a	-0.614059	0.0307109
Gm36839	0.831312	0.00409515
Gm30655	-0.748298	0.00914772
Adcy2	-0.35209	0.0191991
2810049E08Rik	-0.44733	0.0468072
3830408C21Rik	-0.474165	0.0457219
Mocs2	0.324184	0.00600693
Tkt	0.37865	0.00329038
Prkcd	0.514076	0.000826666
Gm49303	1.2086	0.0047432
Irf9	0.630471	0.00919095
Gjb6	0.450681	0.0372145
Bin3	-0.521314	0.0432479
Slain1	-0.509084	0.0109809
Nalcn	-0.886391	0.017296
Itgbl1	-0.766105	3.00038e-05
Trib1	0.675932	0.00652323
Adcy8	-0.348231	0.0134631
Tst	0.331929	0.0194863
Pdzrn4	-1.13803	0.0139863
Endou	0.967687	0.0192387
Eef2kmt	0.618823	0.023566
Cxadr	-1.21154	0.025717
Ncam2	-0.149812	0.0206927
N6amt1	0.510179	0.0145921
Tiam1	-1.07275	0.0396165
Tekt4	1.86494	0.0161984
Haghl	0.67951	0.0147362
Atp6v0e	0.433405	0.0458149
Lemd2	0.489121	0.00469116
E230001N04Rik	2.47466	0.0167887
Ier3	1.06446	0.0462565
Ptchd4	-0.202062	0.00329038
L3mbtl4	-1.27195	0.0218814
Alk	-0.755023	0.0406826
Ttc39c	-0.449917	0.00409515
Kctd1	-0.242931	0.0039933
Zfp24	0.461888	0.000859537
Epb41l4a	-0.773095	0.0372419
1700066B19Rik	0.782942	0.0342821
Apbb3	0.43905	0.0462565
Efemp2	0.534892	0.00600693
Htr7	-2.81677	0.0380084
Cask	-0.264619	0.0115897
Msn	0.440675	0.0144218
Phka1	0.356571	0.0279594
Gm15246	-0.621558	0.00942536
